# Supplementary material
Source: HighWire-hosted journal article supplement (https://gut.bmj.com/content/71/3/534)
Supplement: inline-supplementary-material-3 [file inline-supplementary-material-3.pdf]

**Supplementary Table S2:** Expression fold change of the genes detected in the RNAseq analysis in pools of RNA extracted from the interscapular brown adipose tissue of mice treated by daily oral gavage with live *D. welbionis* J115<sup>T</sup> frozen in trehalose and fed a high fat-diet (HFD Live J115) and mice fed a high-fat diet (HFD) and treated by daily oral gavage with an equivalent volume of vehicle (experiment 3).

| Refseq number  | Fold-change (HFD-J115 / HFD) |
|----------------|------------------------------|
| NM_001001130.2 | 1,349785249                  |
| NM_001001186.3 | 1,160551824                  |
| NM_001001187.3 | 0,868505066                  |
| NM_001001445.2 | 0,866660533                  |
| NM_001001488.3 | 0,422541469                  |
| NM_001001491.1 | 0,658981714                  |
| NM_001001493.2 | 0,927191959                  |
| NM_001001495.2 | 0,23278905                   |
| NM_001001737.2 | 0,611183607                  |
| NM_001001806.2 | 0,850825363                  |
| NM_001001881.2 | 0,77101815                   |
| NM_001001979.2 | 2,17672878                   |
| NM_001001984.2 | 0,820197683                  |
| NM_001001985.3 | 1,110607893                  |
| NM_001002005.2 | 0,997667358                  |
| NM_001002267.2 | 1,113186736                  |
| NM_001002897.3 | 0,875146805                  |
| NM_001003666.2 | 1,08836439                   |
| NM_001003672.1 | 0,598600415                  |
| NM_001003817.1 | 0,953274665                  |
| NM_001003955.2 | 1,496501037                  |
| NM_001004139.2 | 0,832835359                  |
| NM_001004143.4 | 0,94869096                   |
| NM_001004144.1 | 0,581972625                  |
| NM_001004149.1 | 0,917059574                  |
| NM_001004178.1 | 0,956289449                  |
| NM_001004180.1 | 0,712619541                  |
| NM_001004190.3 | 0,848410036                  |
| NM_001004191.3 | 1,090265226                  |
| NM_001004363.1 | 0,906970325                  |
| NM_001004367.4 | 0,758227192                  |
| NM_001005341.3 | 1,032496707                  |
| NM_001005358.2 | 1,179061423                  |
| NM_001005419.2 | 0,846908735                  |
| NM_001005422.1 | 1,89556798                   |
| NM_001005424.2 | 1,097434093                  |
| NM_001005506.3 | 0,798133886                  |
| NM_001005508.2 | 0,434668351                  |
| NM_001005510.2 | 0,981521601                  |
| NM_001005865.3 | 0,967886243                  |
| NM_001005916.2 | 1,061832686                  |
| NM_001007567.2 | 0,798133886                  |
| NM_001007568.2 | 1,189026274                  |
| NM_001007570.2 | 1,067869351                  |

|                |             |
|----------------|-------------|
| NM_001007574.2 | 0,88577943  |
| NM_001007575.2 | 1,171368371 |
| NM_001007577.2 | 0,997667358 |
| NM_001007581.1 | 1,068282652 |
| NM_001008233.3 | 0,769215992 |
| NM_001008421.1 | 1,247084197 |
| NM_001008427.1 | 0,9827768   |
| NM_001008498.2 | 0,979798689 |
| NM_001008501.2 | 1,035281387 |
| NM_001008533.3 | 0,997667358 |
| NM_001008547.1 | 1,377731113 |
| NM_001008700.3 | 0,809608654 |
| NM_001009546.1 | 0,399066943 |
| NM_001009575.5 | 1,152745185 |
| NM_001009927.2 | 1,154328532 |
| NM_001010834.2 | 1,511617209 |
| NM_001011780.1 | 1,330223144 |
| NM_001012236.1 | 1,425239082 |
| NM_001012273.1 | 0,149650104 |
| NM_001012309.2 | 0,872822046 |
| NM_001012324.2 | 0,931080962 |
| NM_001012401.2 | 0,801157121 |
| NM_001012477.2 | 0,764268996 |
| NM_001012765.4 | 0,743603    |
| NM_001013012.1 | 1,304641929 |
| NM_001013013.2 | 0,659173076 |
| NM_001013028.2 | 0,75172578  |
| NM_001013365.2 | 0,309620904 |
| NM_001013367.3 | 1,662778929 |
| NM_001013371.2 | 0,842019547 |
| NM_001013372.2 | 0,942241393 |
| NM_001013375.1 | 1,013833264 |
| NM_001013379.2 | 0,983689531 |
| NM_001013382.2 | 1,282715174 |
| NM_001013389.2 | 2,257878757 |
| NM_001013390.2 | 1,154461721 |
| NM_001013577.1 | 1,03017281  |
| NM_001013741.1 | 1,995334715 |
| NM_001013769.1 | 0,975978937 |
| NM_001013806.1 | 0,973189901 |
| NM_001013813.3 | 0,906331614 |
| NM_001013814.1 | 0,902651419 |
| NM_001014390.2 | 0,748250518 |
| NM_001014397.4 | 0,613949143 |
| NM_001017429.2 | 0,82307557  |
| NM_001017966.2 | 0,917921838 |
| NM_001017968.2 | 0,911307034 |
| NM_001017985.2 | 0,922086497 |
| NM_001018042.3 | 0,731622729 |
| NM_001018063.1 | 0,729435708 |
| NM_001024135.2 | 0,906970325 |
| NM_001024139.1 | 0,325768933 |
| NM_001024206.2 | 0,997667358 |
| NM_001024230.2 | 0,410804206 |
| NM_001024539.1 | 0,697233437 |
| NM_001024624.2 | 0,673425466 |

|                |             |
|----------------|-------------|
| NM_001024726.2 | 1,213379219 |
| NM_001024728.2 | 0,688865556 |
| NM_001024731.2 | 0,665111572 |
| NM_001024806.2 | 1,050961554 |
| NM_001024849.3 | 1,042400525 |
| NM_001024911.2 | 0,893336131 |
| NM_001024919.1 | 0,960433839 |
| NM_001024926.3 | 1,089681704 |
| NM_001024945.1 | 0,685896308 |
| NM_001024950.2 | 1,496501037 |
| NM_001024952.2 | 0,904861092 |
| NM_001025245.1 | 0,892196148 |
| NM_001025296.2 | 1,621209456 |
| NM_001025373.2 | 1,012988356 |
| NM_001025388.1 | 1,027010515 |
| NM_001025570.1 | 0,629812354 |
| NM_001025575.2 | 0,867536833 |
| NM_001025577.2 | 0,562990033 |
| NM_001025605.1 | 0,884296067 |
| NM_001025612.2 | 0,803676483 |
| NM_001026211.2 | 0,905574986 |
| NM_001026212.1 | 0,884569889 |
| NM_001029867.1 | 0,480358357 |
| NM_001029873.2 | 0,748250518 |
| NM_001029877.3 | 0,80830343  |
| NM_001029890.2 | 0,406457072 |
| NM_001029912.2 | 1,286529683 |
| NM_001029938.2 | 1,074378218 |
| NM_001029982.2 | 0,73927869  |
| NM_001029990.1 | 1,01633473  |
| NM_001030274.1 | 1,037255325 |
| NM_001030293.2 | 1,282715174 |
| NM_001031664.1 | 0,613949143 |
| NM_001031808.2 | 0,948748585 |
| NM_001033039.2 | 0,946711229 |
| NM_001033041.2 | 0,997667358 |
| NM_001033042.3 | 1,114635255 |
| NM_001033131.3 | 0,648483782 |
| NM_001033140.3 | 1,098946707 |
| NM_001033145.2 | 0,931510612 |
| NM_001033148.3 | 0,647135583 |
| NM_001033149.3 | 0,675839178 |
| NM_001033156.4 | 0,765090127 |
| NM_001033161.2 | 0,850021026 |
| NM_001033164.2 | 0,959228335 |
| NM_001033165.3 | 1,155193783 |
| NM_001033171.2 | 1,179061423 |
| NM_001033172.3 | 0,7759635   |
| NM_001033173.1 | 0,89468234  |
| NM_001033174.1 | 0,99272841  |
| NM_001033175.2 | 0,762795345 |
| NM_001033181.1 | 0,893837723 |
| NM_001033189.3 | 0,997667358 |
| NM_001033192.2 | 0,306974572 |
| NM_001033194.3 | 0,997078068 |
| NM_001033208.4 | 0,944824807 |

|                |             |
|----------------|-------------|
| NM_001033212.2 | 0,878897434 |
| NM_001033215.3 | 1,080806304 |
| NM_001033222.3 | 0,923914298 |
| NM_001033225.2 | 0,995826077 |
| NM_001033228.3 | 0,884744978 |
| NM_001033242.1 | 0,873680909 |
| NM_001033248.3 | 1,282715174 |
| NM_001033256.3 | 0,903382311 |
| NM_001033262.2 | 1,295048974 |
| NM_001033266.2 | 0,4655781   |
| NM_001033273.2 | 0,865917282 |
| NM_001033279.3 | 1,112782822 |
| NM_001033288.3 | 1,496501037 |
| NM_001033289.2 | 0,892649741 |
| NM_001033297.2 | 1,166503372 |
| NM_001033301.4 | 0,923766072 |
| NM_001033305.3 | 1,162702471 |
| NM_001033306.1 | 1,078239068 |
| NM_001033313.3 | 0,891849353 |
| NM_001033322.2 | 0,763672881 |
| NM_001033326.2 | 0,886815429 |
| NM_001033340.3 | 1,097434093 |
| NM_001033341.2 | 0,923331358 |
| NM_001033343.1 | 0,987282716 |
| NM_001033352.3 | 1,032624384 |
| NM_001033374.3 | 0,789819991 |
| NM_001033378.3 | 0,674099566 |
| NM_001033380.3 | 0,677976619 |
| NM_001033385.3 | 0,971047463 |
| NM_001033393.2 | 0,929351634 |
| NM_001033394.3 | 1,16465889  |
| NM_001033399.4 | 0,78885326  |
| NM_001033430.4 | 0,857150828 |
| NM_001033432.3 | 1,134602093 |
| NM_001033437.2 | 1,197200829 |
| NM_001033441.3 | 0,908324012 |
| NM_001033445.2 | 0,96548454  |
| NM_001033457.2 | 1,039236831 |
| NM_001033466.3 | 1,108519286 |
| NM_001033474.2 | 0,996531709 |
| NM_001033484.1 | 0,249416839 |
| NM_001033496.3 | 0,946983722 |
| NM_001033525.3 | 0,636325422 |
| NM_001033530.3 | 0,692732484 |
| NM_001033540.2 | 1,134430194 |
| NM_001033543.3 | 0,938105127 |
| NM_001033630.1 | 0,997667358 |
| NM_001033632.1 | 0,374125259 |
| NM_001033633.3 | 0,809428234 |
| NM_001033634.3 | 1,066869718 |
| NM_001033775.3 | 1,071568643 |
| NM_001033813.4 | 0,959295536 |
| NM_001033851.1 | 0,544182195 |
| NM_001033960.1 | 1,567762991 |
| NM_001034851.2 | 0,230230929 |
| NM_001034859.3 | 0,221703857 |

|                |             |
|----------------|-------------|
| NM_001034862.2 | 1,219371215 |
| NM_001034868.3 | 0,997667358 |
| NM_001034881.3 | 0,997667358 |
| NM_001034882.3 | 0,427571725 |
| NM_001034895.3 | 1,190764266 |
| NM_001034903.3 | 1,148829079 |
| NM_001034909.3 | 1,074411001 |
| NM_001034910.3 | 5,18787026  |
| NM_001035123.3 | 1,330223144 |
| NM_001035231.3 | 0,799354274 |
| NM_001037166.2 | 1,731246297 |
| NM_001037170.2 | 0,72557626  |
| NM_001037294.1 | 0,581972625 |
| NM_001037717.3 | 0,80792694  |
| NM_001037725.3 | 0,927473922 |
| NM_001037741.3 | 0,941062118 |
| NM_001037746.3 | 0,884456877 |
| NM_001037841.3 | 1,247084197 |
| NM_001037916.3 | 0,98972836  |
| NM_001037917.2 | 0,66966713  |
| NM_001037923.4 | 0,904664468 |
| NM_001037928.3 | 0,954290516 |
| NM_001037933.2 | 2,194868187 |
| NM_001037941.3 | 1,318346151 |
| NM_001037999.2 | 0,9683242   |
| NM_001038230.2 | 0,311771049 |
| NM_001038499.1 | 0,922371708 |
| NM_001038625.1 | 3,192535545 |
| NM_001038643.1 | 0,786892564 |
| NM_001038651.3 | 0,914063948 |
| NM_001038663.1 | 0,840140933 |
| NM_001038699.2 | 1,107502296 |
| NM_001038703.2 | 0,584839486 |
| NM_001038995.2 | 0,972086143 |
| NM_001039000.4 | 0,831389465 |
| NM_001039048.2 | 0,671506875 |
| NM_001039088.1 | 1,015859687 |
| NM_001039093.1 | 0,7329801   |
| NM_001039094.3 | 1,104560289 |
| NM_001039115.2 | 1,296967565 |
| NM_001039153.3 | 0,415694732 |
| NM_001039173.1 | 0,544182195 |
| NM_001039202.1 | 1,496501037 |
| NM_001039209.2 | 1,121281844 |
| NM_001039214.4 | 0,905730116 |
| NM_001039220.3 | 1,164874177 |
| NM_001039223.3 | 0,69311627  |
| NM_001039231.3 | 1,064178515 |
| NM_001039244.3 | 1,122375777 |
| NM_001039347.1 | 0,930408884 |
| NM_001039371.2 | 1,035079884 |
| NM_001039373.5 | 0,762320186 |
| NM_001039389.2 | 1,116910468 |
| NM_001039394.1 | 0,735123316 |
| NM_001039472.1 | 0,567301047 |
| NM_001039482.1 | 1,097434093 |

|                |             |
|----------------|-------------|
| NM_001039483.1 | 0,944948194 |
| NM_001039494.2 | 1,090907298 |
| NM_001039507.2 | 1,382184985 |
| NM_001039511.1 | 1,074411001 |
| NM_001039521.1 | 0,964946005 |
| NM_001039532.2 | 0,942563637 |
| NM_001039536.2 | 0,924667307 |
| NM_001039545.2 | 0,347267218 |
| NM_001039551.1 | 1,852810807 |
| NM_001039556.3 | 0,488220196 |
| NM_001039562.1 | 0,399066943 |
| NM_001039646.2 | 1,011149349 |
| NM_001039676.2 | 1,066472003 |
| NM_001039684.2 | 1,078403444 |
| NM_001039723.2 | 1,135276648 |
| NM_001039951.2 | 1,011919749 |
| NM_001040072.1 | 0,771685658 |
| NM_001040396.2 | 0,986254927 |
| NM_001040689.1 | 0,490233098 |
| NM_001040695.1 | 0,880294727 |
| NM_001042407.1 | 1,061695018 |
| NM_001042501.1 | 0,919945396 |
| NM_001042556.1 | 1,360455488 |
| NM_001042565.3 | 0,886815429 |
| NM_001042592.2 | 0,758023239 |
| NM_001042605.1 | 0,767436429 |
| NM_001042615.2 | 0,594304239 |
| NM_001042620.2 | 1,434146827 |
| NM_001042653.1 | 0,458387705 |
| NM_001042660.1 | 0,802205998 |
| NM_001042672.1 | 1,058132046 |
| NM_001042727.2 | 1,131500784 |
| NM_001044380.1 | 0,831389465 |
| NM_001045526.2 | 0,478880332 |
| NM_001045530.2 | 1,710286899 |
| NM_001045540.2 | 0,914528411 |
| NM_001047159.2 | 0,415694732 |
| NM_001048061.1 | 1,458129215 |
| NM_001048146.2 | 1,113186736 |
| NM_001048148.1 | 0,436479469 |
| NM_001048167.1 | 1,120532796 |
| NM_001048204.1 | 1,015170294 |
| NM_001076681.2 | 1,055648026 |
| NM_001077189.1 | 0,561187889 |
| NM_001077348.1 | 0,598600415 |
| NM_001077495.2 | 0,969472411 |
| NM_001077688.1 | 0,561187889 |
| NM_001077713.1 | 0,949000657 |
| NM_001078649.1 | 2,272464537 |
| NM_001080557.1 | 1,385649108 |
| NM_001080706.1 | 1,187699235 |
| NM_001080743.1 | 0,997667358 |
| NM_001080769.1 | 1,009023371 |
| NM_001080774.1 | 0,36278813  |
| NM_001080775.1 | 0,896941326 |
| NM_001080780.1 | 0,926405404 |

|                |             |
|----------------|-------------|
| NM_001080813.2 | 1,596267772 |
| NM_001080819.1 | 0,941853799 |
| NM_001080924.2 | 0,748250518 |
| NM_001080929.1 | 0,609685607 |
| NM_001080931.1 | 0,951746767 |
| NM_001080935.1 | 1,082215439 |
| NM_001080940.1 | 0,857854114 |
| NM_001080941.1 | 0,766914363 |
| NM_001080949.2 | 0,712619541 |
| NM_001080971.2 | 0,665111572 |
| NM_001081011.2 | 0,554259643 |
| NM_001081016.1 | 0,290986313 |
| NM_001081019.1 | 0,5372055   |
| NM_001081021.1 | 1,016807259 |
| NM_001081029.1 | 0,998713131 |
| NM_001081040.1 | 1,735073666 |
| NM_001081041.1 | 1,040925413 |
| NM_001081043.1 | 0,873989586 |
| NM_001081049.1 | 0,844677331 |
| NM_001081054.2 | 1,441075072 |
| NM_001081055.1 | 1,010000636 |
| NM_001081059.3 | 1,018251447 |
| NM_001081062.1 | 2,280382532 |
| NM_001081064.1 | 0,712619541 |
| NM_001081067.1 | 1,760589455 |
| NM_001081072.1 | 0,634879228 |
| NM_001081084.2 | 0,737406308 |
| NM_001081087.1 | 0,576686334 |
| NM_001081092.1 | 1,805302838 |
| NM_001081094.1 | 0,997667358 |
| NM_001081098.1 | 0,95460258  |
| NM_001081099.1 | 0,249416839 |
| NM_001081103.2 | 1,068929312 |
| NM_001081106.1 | 1,160208669 |
| NM_001081108.2 | 1,001401941 |
| NM_001081111.2 | 0,847185865 |
| NM_001081116.1 | 0,907228599 |
| NM_001081120.1 | 0,981222291 |
| NM_001081127.1 | 0,53340631  |
| NM_001081141.1 | 1,030377763 |
| NM_001081143.1 | 1,033298335 |
| NM_001081145.1 | 0,99673146  |
| NM_001081150.1 | 1,077010564 |
| NM_001081151.1 | 0,903087272 |
| NM_001081152.1 | 0,6207708   |
| NM_001081154.2 | 1,052435447 |
| NM_001081163.1 | 0,767436429 |
| NM_001081168.1 | 0,968982672 |
| NM_001081169.1 | 0,712619541 |
| NM_001081176.1 | 1,013125851 |
| NM_001081178.1 | 0,975593591 |
| NM_001081179.1 | 0,921450176 |
| NM_001081181.2 | 0,995440422 |
| NM_001081183.1 | 0,945705516 |
| NM_001081187.3 | 0,712619541 |
| NM_001081188.1 | 1,08836439  |

|                |             |
|----------------|-------------|
| NM_001081189.1 | 0,716506557 |
| NM_001081191.1 | 1,225947177 |
| NM_001081192.1 | 0,997667358 |
| NM_001081196.1 | 0,996259549 |
| NM_001081203.1 | 0,984679972 |
| NM_001081210.1 | 1,014390498 |
| NM_001081211.2 | 0,45765637  |
| NM_001081212.1 | 0,89526129  |
| NM_001081217.1 | 1,027385109 |
| NM_001081224.2 | 0,563199315 |
| NM_001081226.1 | 1,161284804 |
| NM_001081228.1 | 1,140191266 |
| NM_001081235.1 | 0,795133383 |
| NM_001081236.1 | 1,167740812 |
| NM_001081237.1 | 0,903547796 |
| NM_001081250.1 | 0,153487286 |
| NM_001081256.1 | 0,940759416 |
| NM_001081265.1 | 0,976018156 |
| NM_001081266.1 | 0,909129778 |
| NM_001081267.2 | 0,932227727 |
| NM_001081279.1 | 1,08569683  |
| NM_001081283.1 | 2,693701866 |
| NM_001081295.1 | 0,675692892 |
| NM_001081300.1 | 1,000083017 |
| NM_001081309.1 | 0,864721449 |
| NM_001081319.1 | 0,992274561 |
| NM_001081326.1 | 0,738273845 |
| NM_001081328.1 | 0,648483782 |
| NM_001081344.2 | 0,539721685 |
| NM_001081345.2 | 0,921721417 |
| NM_001081365.1 | 0,659874473 |
| NM_001081371.2 | 0,41902029  |
| NM_001081381.1 | 1,534872858 |
| NM_001081387.2 | 1,077608652 |
| NM_001081390.1 | 0,399066943 |
| NM_001081400.3 | 0,99419654  |
| NM_001081412.2 | 0,764446417 |
| NM_001081415.1 | 0,826914817 |
| NM_001081420.1 | 0,972369929 |
| NM_001081473.1 | 1,038616391 |
| NM_001081490.2 | 2,743585234 |
| NM_001081549.2 | 1,251974723 |
| NM_001081557.3 | 0,997667358 |
| NM_001081655.1 | 0,750821826 |
| NM_001081656.2 | 0,777684804 |
| NM_001081667.2 | 0,418376634 |
| NM_001081750.1 | 0,922299597 |
| NM_001081957.1 | 0,470809315 |
| NM_001081975.3 | 0,970900672 |
| NM_001082412.2 | 0,845848412 |
| NM_001082414.2 | 0,816273293 |
| NM_001082532.1 | 1,043188302 |
| NM_001082536.1 | 0,756851099 |
| NM_001082974.2 | 0,876329436 |
| NM_001083118.2 | 0,965995378 |
| NM_001083918.1 | 0,578893405 |



|                |             |
|----------------|-------------|
| NM_001083937.1 | 0,779518519 |
| NM_001083945.1 | 0,924239798 |
| NM_001083955.1 | 0,705542155 |
| NM_001083958.1 | 0,855143449 |
| NM_001085355.1 | 0,898841818 |
| NM_001085385.1 | 0,831389465 |
| NM_001085390.1 | 0,498833679 |
| NM_001085421.1 | 0,823762038 |
| NM_001085440.1 | 0,89378099  |
| NM_001085500.2 | 0,942241393 |
| NM_001085501.2 | 0,985339203 |
| NM_001085513.2 | 1,353183565 |
| NM_001085522.2 | 0,379113596 |
| NM_001085531.2 | 0,997667358 |
| NM_001085549.1 | 0,606972448 |
| NM_001093749.2 | 1,502369668 |
| NM_001093750.1 | 0,157526425 |
| NM_001098203.1 | 0,645549467 |
| NM_001098425.1 | 0,69836715  |
| NM_001098636.1 | 1,151154643 |
| NM_001098723.1 | 0,819512472 |
| NM_001099319.2 | 0,910741885 |
| NM_001099327.1 | 1,070282387 |
| NM_001099631.1 | 0,692824554 |
| NM_001099632.1 | 0,997667358 |
| NM_001099636.2 | 0,207847366 |
| NM_001099917.1 | 0,764170742 |
| NM_001100449.1 | 0,748250518 |
| NM_001100451.2 | 0,367561658 |
| NM_001100454.1 | 0,436479469 |
| NM_001100462.1 | 0,997667358 |
| NM_001100606.1 | 0,735123316 |
| NM_001101431.1 | 1,219371215 |
| NM_001101433.1 | 0,874331054 |
| NM_001101478.1 | 1,140880898 |
| NM_001101483.1 | 0,7759635   |
| NM_001101510.1 | 0,598600415 |
| NM_001101535.1 | 0,655609978 |
| NM_001101546.1 | 0,997667358 |
| NM_001101598.1 | 1,261505455 |
| NM_001102409.1 | 0,898520291 |
| NM_001102430.1 | 0,956206472 |
| NM_001102565.1 | 1,033404696 |
| NM_001102607.1 | 3,192535545 |
| NM_001103158.2 | 1,795801244 |
| NM_001103168.1 | 1,425239082 |
| NM_001103179.1 | 0,97974519  |
| NM_001105557.2 | 0,7759635   |
| NM_001105667.1 | 0,861964493 |
| NM_001109914.1 | 0,741170559 |
| NM_001109975.1 | 0,916225124 |
| NM_001110129.1 | 1,396734301 |
| NM_001110159.1 | 0,453485163 |
| NM_001110242.1 | 0,963372542 |
| NM_001110276.1 | 0,940109626 |
| NM_001110310.1 | 0,796138551 |

|                |             |
|----------------|-------------|
| NM_001110508.1 | 1,08569683  |
| NM_001110796.2 | 1,418558274 |
| NM_001110807.1 | 1,425239082 |
| NM_001111015.1 | 1,018237819 |
| NM_001111050.1 | 0,665111572 |
| NM_001111059.1 | 0,249416839 |
| NM_001111062.1 | 1,28731272  |
| NM_001111063.1 | 1,259350599 |
| NM_001111073.2 | 0,332555786 |
| NM_001111140.2 | 0,94778399  |
| NM_001111142.1 | 1,546384404 |
| NM_001111304.1 | 1,349785249 |
| NM_001111320.1 | 0,36278813  |
| NM_001112738.1 | 0,648483782 |
| NM_001113199.1 | 0,823681218 |
| NM_001113248.2 | 0,904861092 |
| NM_001113331.2 | 0,780433336 |
| NM_001113358.1 | 0,552280144 |
| NM_001113384.1 | 1,027104309 |
| NM_001113486.1 | 0,997667358 |
| NM_001113530.1 | 0,997667358 |
| NM_001113533.1 | 0,955660311 |
| NM_001113563.1 | 0,864645043 |
| NM_001113569.1 | 0,634879228 |
| NM_001114088.2 | 1,269758455 |
| NM_001114332.1 | 0,884767356 |
| NM_001114597.1 | 0,904374036 |
| NM_001114637.1 | 0,798133886 |
| NM_001114663.1 | 0,916040028 |
| NM_001114679.1 | 0,820304272 |
| NM_001115087.1 | 0,961055712 |
| NM_001122594.2 | 0,951467493 |
| NM_001122675.1 | 0,930750645 |
| NM_001122982.2 | 1,388058932 |
| NM_001127177.1 | 1,220774404 |
| NM_001127189.3 | 0,675930218 |
| NM_001127376.1 | 1,097434093 |
| NM_001128090.1 | 1,330223144 |
| NM_001130408.1 | 1,151154643 |
| NM_001134480.1 | 0,81226015  |
| NM_001134646.1 | 0,554259643 |
| NM_001134717.2 | 0,817366028 |
| NM_001135115.1 | 0,665111572 |
| NM_001135577.2 | 0,855602612 |
| NM_001136069.2 | 1,054139095 |
| NM_001136081.2 | 0,665111572 |
| NM_001136085.2 | 0,886815429 |
| NM_001136117.1 | 1,381385572 |
| NM_001136240.1 | 1,219371215 |
| NM_001136270.1 | 1,126885838 |
| NM_001139520.1 | 0,977306799 |
| NM_001141927.1 | 1,904637683 |
| NM_001142411.2 | 0,823211863 |
| NM_001142441.1 | 0,872958938 |
| NM_001142642.1 | 1,07643057  |
| NM_001142698.1 | 0,665111572 |

|                |             |
|----------------|-------------|
| NM_001142731.1 | 1,231688096 |
| NM_001142732.1 | 0,72557626  |
| NM_001142804.1 | 1,2355147   |
| NM_001142938.1 | 0,922725209 |
| NM_001142957.1 | 1,023308341 |
| NM_001142960.1 | 1,710286899 |
| NM_001142963.1 | 0,712619541 |
| NM_001142965.1 | 0,816273293 |
| NM_001142968.1 | 0,981831368 |
| NM_001143686.1 | 1,852810807 |
| NM_001143689.1 | 1,067279035 |
| NM_001143765.1 | 1,151154643 |
| NM_001145015.1 | 0,528176836 |
| NM_001145034.1 | 0,970519947 |
| NM_001145162.1 | 1,421334318 |
| NM_001145164.1 | 1,533112683 |
| NM_001145209.1 | 1,254210393 |
| NM_001145433.1 | 1,113222095 |
| NM_001145820.1 | 0,826350741 |
| NM_001145832.1 | 0,598600415 |
| NM_001145936.1 | 0,591210286 |
| NM_001145978.2 | 0,948514638 |
| NM_001146000.1 | 1,795801244 |
| NM_001146043.2 | 1,132944288 |
| NM_001146057.1 | 0,332555786 |
| NM_001146100.1 | 1,330223144 |
| NM_001146346.1 | 0,886815429 |
| NM_001146347.1 | 0,820661859 |
| NM_001146349.1 | 0,990109272 |
| NM_001146708.1 | 1,621209456 |
| NM_001146710.1 | 0,7759635   |
| NM_001159275.1 | 0,872958938 |
| NM_001159393.1 | 0,997667358 |
| NM_001159396.1 | 1,688360144 |
| NM_001159418.1 | 0,332555786 |
| NM_001159422.1 | 1,260211399 |
| NM_001159482.1 | 0,997667358 |
| NM_001159487.1 | 2,394401658 |
| NM_001159497.1 | 0,957760663 |
| NM_001159517.1 | 1,518189457 |
| NM_001159519.1 | 0,986869257 |
| NM_001159529.1 | 2,743585234 |
| NM_001159552.1 | 1,026172139 |
| NM_001159553.1 | 0,897900622 |
| NM_001159645.1 | 1,035122446 |
| NM_001159724.1 | 0,931377168 |
| NM_001159731.1 | 2,358122845 |
| NM_001159885.1 | 0,798133886 |
| NM_001159889.1 | 1,140403671 |
| NM_001159963.1 | 0,89872514  |
| NM_001160319.1 | 0,948929649 |
| NM_001160330.1 | 0,936369999 |
| NM_001160356.1 | 1,085966034 |
| NM_001160370.2 | 1,269758455 |
| NM_001160399.1 | 0,69836715  |
| NM_001161111.1 | 1,330223144 |

|                |             |
|----------------|-------------|
| NM_001161411.1 | 1,214551566 |
| NM_001161850.2 | 0,617603602 |
| NM_001162489.1 | 0,903769253 |
| NM_001162532.1 | 1,117387441 |
| NM_001162903.1 | 0,9609489   |
| NM_001162908.1 | 0,851667257 |
| NM_001162922.1 | 1,074411001 |
| NM_001162926.1 | 0,819072584 |
| NM_001162932.1 | 0,399066943 |
| NM_001162938.1 | 1,385649108 |
| NM_001162946.1 | 1,496501037 |
| NM_001162955.1 | 0,886815429 |
| NM_001162983.1 | 1,330223144 |
| NM_001162998.1 | 1,884482787 |
| NM_001163064.1 | 0,743160379 |
| NM_001163085.2 | 1,058660122 |
| NM_001163098.1 | 0,367561658 |
| NM_001163102.1 | 1,035416933 |
| NM_001163144.1 | 1,061348253 |
| NM_001163170.1 | 0,822777462 |
| NM_001163246.2 | 0,831977019 |
| NM_001163262.1 | 0,703117947 |
| NM_001163284.1 | 1,134602093 |
| NM_001163290.1 | 1,829056822 |
| NM_001163314.2 | 0,733710523 |
| NM_001163379.1 | 1,080806304 |
| NM_001163430.1 | 1,030922936 |
| NM_001163445.2 | 0,997973297 |
| NM_001163502.1 | 1,365229016 |
| NM_001163564.1 | 0,789482028 |
| NM_001163567.1 | 0,744742546 |
| NM_001163572.1 | 0,95742374  |
| NM_001163619.1 | 0,69836715  |
| NM_001163621.1 | 0,994783926 |
| NM_001163622.1 | 1,173726303 |
| NM_001163640.1 | 0,574414539 |
| NM_001163728.1 | 0,952318841 |
| NM_001163734.1 | 1,795801244 |
| NM_001163741.2 | 0,838188932 |
| NM_001163766.1 | 0,798133886 |
| NM_001163780.1 | 1,995334715 |
| NM_001164074.1 | 0,69836715  |
| NM_001164075.1 | 2,43874243  |
| NM_001164077.1 | 0,787632124 |
| NM_001164336.1 | 0,801696984 |
| NM_001164337.1 | 0,901561787 |
| NM_001164367.1 | 0,950159388 |
| NM_001164370.1 | 0,906214517 |
| NM_001164493.1 | 0,947664936 |
| NM_001164504.1 | 0,748250518 |
| NM_001164518.1 | 0,702704835 |
| NM_001164525.1 | 0,930257401 |
| NM_001164564.1 | 1,330223144 |
| NM_001164580.1 | 0,938771074 |
| NM_001164581.1 | 0,892649741 |
| NM_001164598.1 | 0,671872005 |

|                |             |
|----------------|-------------|
| NM_001164604.1 | 0,773891502 |
| NM_001164641.1 | 1,219371215 |
| NM_001164655.1 | 0,249416839 |
| NM_001164663.1 | 0,997667358 |
| NM_001164676.1 | 0,997667358 |
| NM_001164709.1 | 6,983671504 |
| NM_001164763.1 | 1,21145322  |
| NM_001164769.1 | 0,915891345 |
| NM_001164772.1 | 0,95138382  |
| NM_001164791.1 | 0,979608362 |
| NM_001164793.1 | 1,051170024 |
| NM_001164797.1 | 0,728792467 |
| NM_001164801.1 | 0,920923715 |
| NM_001164806.1 | 0,340666903 |
| NM_001165934.1 | 0,594355022 |
| NM_001165942.1 | 0,469490521 |
| NM_001166024.1 | 0,811661579 |
| NM_001166030.1 | 0,472440362 |
| NM_001166138.1 | 1,061620393 |
| NM_001166218.1 | 0,871835439 |
| NM_001166250.1 | 0,498833679 |
| NM_001166360.1 | 1,416043992 |
| NM_001166388.1 | 0,665111572 |
| NM_001166427.1 | 0,72557626  |
| NM_001166552.1 | 0,790459522 |
| NM_001166553.1 | 0,882551893 |
| NM_001166581.1 | 0,978724307 |
| NM_001166590.1 | 0,920923715 |
| NM_001166629.2 | 0,51308607  |
| NM_001166630.1 | 0,817238155 |
| NM_001166645.1 | 0,983874721 |
| NM_001167700.2 | 1,371792617 |
| NM_001167746.1 | 0,677660847 |
| NM_001167750.1 | 1,688360144 |
| NM_001167751.1 | 0,570095633 |
| NM_001167784.1 | 0,370562161 |
| NM_001167799.1 | 0,6301057   |
| NM_001167831.1 | 0,685896308 |
| NM_001167879.1 | 0,701063549 |
| NM_001167883.1 | 0,554259643 |
| NM_001167889.1 | 1,242995396 |
| NM_001167908.1 | 0,933508685 |
| NM_001167918.1 | 1,000663356 |
| NM_001167923.1 | 0,306974572 |
| NM_001168225.1 | 1,067272057 |
| NM_001168248.1 | 0,418376634 |
| NM_001168250.1 | 0,399066943 |
| NM_001168346.1 | 0,507288487 |
| NM_001168469.2 | 0,739012858 |
| NM_001168472.1 | 0,402045055 |
| NM_001168477.1 | 1,330223144 |
| NM_001168507.1 | 1,627773057 |
| NM_001168564.1 | 1,745917876 |
| NM_001168658.1 | 0,963265035 |
| NM_001170454.1 | 1,061954901 |
| NM_001170935.1 | 0,829386117 |

|                |             |
|----------------|-------------|
| NM_001170966.1 | 0,97961003  |
| NM_001170976.1 | 0,842474658 |
| NM_001171002.1 | 0,722237719 |
| NM_001171034.1 | 1,239526111 |
| NM_001171035.1 | 0,6301057   |
| NM_001171036.1 | 0,685896308 |
| NM_001171052.1 | 1,425239082 |
| NM_001171512.2 | 0,63082747  |
| NM_001172054.1 | 0,729064608 |
| NM_001172062.1 | 0,881659525 |
| NM_001172074.1 | 0,798133886 |
| NM_001172100.1 | 1,163945251 |
| NM_001172101.1 | 1,541849553 |
| NM_001173500.2 | 1,036465533 |
| NM_001176528.1 | 0,9749931   |
| NM_001177313.1 | 1,197200829 |
| NM_001177399.1 | 0,994244828 |
| NM_001177400.1 | 1,007545252 |
| NM_001177427.1 | 1,018894323 |
| NM_001177438.1 | 1,165785965 |
| NM_001177536.1 | 1,092683297 |
| NM_001177568.1 | 1,147022293 |
| NM_001177621.1 | 0,69836715  |
| NM_001177622.1 | 0,997667358 |
| NM_001177658.1 | 1,033852184 |
| NM_001177666.1 | 0,997667358 |
| NM_001177715.2 | 1,385649108 |
| NM_001177750.1 | 0,982474454 |
| NM_001177770.1 | 0,899856832 |
| NM_001177844.1 | 1,074411001 |
| NM_001177973.1 | 0,920923715 |
| NM_001177980.1 | 1,140191266 |
| NM_001190258.1 | 0,665111572 |
| NM_001190352.1 | 2,448819878 |
| NM_001190356.1 | 1,810581501 |
| NM_001190409.1 | 0,539721685 |
| NM_001190451.2 | 1,056353673 |
| NM_001190454.1 | 0,767436429 |
| NM_001190732.1 | 1,014576974 |
| NM_001190804.1 | 1,005844959 |
| NM_001190817.1 | 0,997667358 |
| NM_001190830.1 | 0,926405404 |
| NM_001191051.1 | 1,918591072 |
| NM_001195083.1 | 1,08836439  |
| NM_001195244.1 | 0,915933881 |
| NM_001195258.1 | 1,259064919 |
| NM_001195298.1 | 0,412827872 |
| NM_001195421.1 | 2,549594359 |
| NM_001195529.1 | 0,933156536 |
| NM_001195565.1 | 0,997667358 |
| NM_001195673.1 | 0,737406308 |
| NM_001199048.1 | 0,956362658 |
| NM_001199113.1 | 1,762545665 |
| NM_001199188.1 | 3,491835752 |
| NM_001199249.1 | 0,758227192 |
| NM_001199270.1 | 0,792265255 |

|                |             |
|----------------|-------------|
| NM_001199296.1 | 0,567301047 |
| NM_001199350.1 | 1,41336209  |
| NM_001199357.1 | 0,64365636  |
| NM_001199494.1 | 0,872958938 |
| NM_001200002.1 | 1,010716515 |
| NM_001200023.1 | 1,002307671 |
| NM_001201322.1 | 0,853145451 |
| NM_001201391.1 | 0,823969603 |
| NM_001204167.1 | 0,820304272 |
| NM_001204875.1 | 0,7746239   |
| NM_001204912.1 | 1,027478135 |
| NM_001204983.1 | 0,262544041 |
| NM_001205057.2 | 1,148829079 |
| NM_001205095.1 | 0,900069464 |
| NM_001205181.1 | 1,433268598 |
| NM_001205234.1 | 0,966490253 |
| NM_001205362.1 | 0,997667358 |
| NM_001206382.1 | 0,862390428 |
| NM_001206661.1 | 1,795801244 |
| NM_001206684.1 | 1,269758455 |
| NM_001220499.2 | 0,962036381 |
| NM_001242360.1 | 0,665111572 |
| NM_001243008.1 | 0,3310843   |
| NM_001243064.1 | 0,712619541 |
| NM_001243123.1 | 0,907946797 |
| NM_001243240.1 | 0,665111572 |
| NM_001243748.1 | 0,682614508 |
| NM_001243769.1 | 0,901737804 |
| NM_001243837.1 | 0,981149686 |
| NM_001251881.1 | 1,047179385 |
| NM_001252193.1 | 0,436479469 |
| NM_001252251.1 | 1,757794868 |
| NM_001252261.1 | 1,101591041 |
| NM_001252435.1 | 0,971412954 |
| NM_001252445.1 | 0,665111572 |
| NM_001252457.1 | 0,997667358 |
| NM_001252472.1 | 0,343734132 |
| NM_001252480.1 | 1,013049894 |
| NM_001252508.1 | 0,964411779 |
| NM_001252530.1 | 1,208712376 |
| NM_001252582.1 | 0,383718214 |
| NM_001252583.1 | 2,106186644 |
| NM_001252588.1 | 0,577596891 |
| NM_001252666.1 | 0,997667358 |
| NM_001253385.1 | 1,496501037 |
| NM_001253751.1 | 1,496501037 |
| NM_001253755.1 | 1,090553629 |
| NM_001253844.1 | 0,926405404 |
| NM_001253869.1 | 1,127797883 |
| NM_001254744.1 | 0,997667358 |
| NM_001254745.1 | 1,247084197 |
| NM_001254946.1 | 0,945158549 |
| NM_001254951.1 | 0,952318841 |
| NM_001255991.1 | 1,039236831 |
| NM_001256052.1 | 1,162419765 |
| NM_001256055.1 | 1,105523288 |

|                |             |
|----------------|-------------|
| NM_001256065.1 | 0,864645043 |
| NM_001256158.1 | 0,498833679 |
| NM_001256311.1 | 0,821608412 |
| NM_001256380.1 | 1,167857672 |
| NM_001256493.1 | 1,052584827 |
| NM_001256521.1 | 1,01464893  |
| NM_001256522.1 | 1,011919749 |
| NM_001267622.1 | 0,829310991 |
| NM_001267625.1 | 1,350500935 |
| NM_001267796.1 | 0,977430697 |
| NM_001270646.1 | 0,944280476 |
| NM_001270842.1 | 1,074411001 |
| NM_001271016.1 | 0,498833679 |
| NM_001271402.1 | 2,494168394 |
| NM_001271403.1 | 1,197200829 |
| NM_001271407.1 | 0,855143449 |
| NM_001271409.1 | 0,825655744 |
| NM_001271421.1 | 1,852810807 |
| NM_001271492.1 | 2,618876814 |
| NM_001271523.1 | 2,327890501 |
| NM_001271548.1 | 1,112782822 |
| NM_001271591.1 | 1,408471564 |
| NM_001271607.1 | 0,920923715 |
| NM_001271768.1 | 3,658113645 |
| NM_001271777.1 | 0,73043503  |
| NM_001271806.1 | 0,634879228 |
| NM_001272033.1 | 0,327592267 |
| NM_001276317.1 | 1,371792617 |
| NM_001276350.1 | 1,434146827 |
| NM_001276489.1 | 1,049569128 |
| NM_001276704.1 | 1,083580585 |
| NM_001277076.1 | 0,897390741 |
| NM_001277149.1 | 0,332555786 |
| NM_001277230.1 | 1,276086155 |
| NM_001277255.1 | 0,498833679 |
| NM_001277256.1 | 1,269758455 |
| NM_001277259.1 | 1,163945251 |
| NM_001277340.1 | 1,529756615 |
| NM_001277756.1 | 0,460461857 |
| NM_001278256.1 | 1,496501037 |
| NM_001278671.1 | 1,038388474 |
| NM_001281472.1 | 0,770634081 |
| NM_001282042.1 | 1,165948599 |
| NM_001282055.1 | 1,026172139 |
| NM_001282093.1 | 0,570095633 |
| NM_001282148.1 | 0,665111572 |
| NM_001282737.1 | 0,989222773 |
| NM_001283063.1 | 0,888232067 |
| NM_001284227.1 | 1,037574052 |
| NM_001284248.1 | 0,963265035 |
| NM_001284359.1 | 0,997667358 |
| NM_001284397.1 | 0,475079694 |
| NM_001285441.1 | 1,627773057 |
| NM_001285459.1 | 0,378425549 |
| NM_001285503.1 | 1,163945251 |
| NM_001285792.1 | 4,822058895 |



|                |             |
|----------------|-------------|
| NM_001285890.1 | 0,688046454 |
| NM_001285904.1 | 0,683716091 |
| NM_001285943.1 | 1,219371215 |
| NM_001285949.1 | 0,436479469 |
| NM_001285956.1 | 0,862847444 |
| NM_001286009.1 | 1,396734301 |
| NM_001286689.1 | 0,997667358 |
| NM_001286844.1 | 1,074411001 |
| NM_001286972.1 | 1,03267323  |
| NM_001287087.1 | 1,425239082 |
| NM_001288613.1 | 0,6301057   |
| NM_001289118.1 | 0,628964204 |
| NM_001289460.2 | 0,997667358 |
| NM_001289463.1 | 1,567762991 |
| NM_001289476.1 | 0,957760663 |
| NM_001289504.1 | 0,798133886 |
| NM_001289601.1 | 1,596267772 |
| NM_001289611.1 | 0,893433455 |
| NM_001289617.1 | 1,097434093 |
| NM_001289658.1 | 0,89620966  |
| NM_001289740.1 | 0,945550406 |
| NM_001289926.1 | 0,856404723 |
| NM_001290182.1 | 1,555187352 |
| NM_001290273.1 | 0,884379123 |
| NM_001290308.1 | 0,665111572 |
| NM_001290320.1 | 0,6301057   |
| NM_001290337.1 | 0,498833679 |
| NM_001290399.1 | 2,327890501 |
| NM_001290485.1 | 1,254210393 |
| NM_001290501.1 | 1,30204045  |
| NM_001290518.1 | 0,810604728 |
| NM_001290525.1 | 1,425239082 |
| NM_001290543.1 | 1,384517966 |
| NM_001290624.1 | 0,845848412 |
| NM_001290631.1 | 0,906970325 |
| NM_001290634.1 | 0,554259643 |
| NM_001290660.1 | 0,586863152 |
| NM_001290719.1 | 1,425239082 |
| NM_001290729.1 | 0,498833679 |
| NM_001290750.1 | 0,912153013 |
| NM_001290763.1 | 1,425239082 |
| NM_001290770.1 | 0,69836715  |
| NM_001290788.1 | 1,227898286 |
| NM_001290819.1 | 1,396734301 |
| NM_001290820.1 | 1,639024945 |
| NM_001291058.1 | 0,390391575 |
| NM_001291068.1 | 0,914542933 |
| NM_001291078.1 | 0,604646883 |
| NM_001291292.1 | 0,249416839 |
| NM_001291455.1 | 0,26026105  |
| NM_001291503.1 | 0,997667358 |
| NM_001291865.1 | 0,950567182 |
| NM_001293559.1 | 1,686532914 |
| NM_001293648.1 | 1,745917876 |
| NM_001293683.1 | 0,900300192 |
| NM_001293759.1 | 0,681739361 |

|                |             |
|----------------|-------------|
| NM_001294269.1 | 1,378594894 |
| NM_001294331.1 | 0,498833679 |
| NM_001301269.1 | 0,868350611 |
| NM_001301368.1 | 0,908766306 |
| NM_001301374.1 | 0,997667358 |
| NM_001301652.1 | 1,269758455 |
| NM_001301671.1 | 0,199533472 |
| NM_001301711.1 | 2,743585234 |
| NM_001301728.1 | 1,04042453  |
| NM_001302086.1 | 0,997667358 |
| NM_001302218.1 | 1,995334715 |
| NM_001302382.1 | 1,020159053 |
| NM_001302393.1 | 1,243247015 |
| NM_001302394.1 | 1,330223144 |
| NM_001302471.1 | 0,741006046 |
| NM_001302476.1 | 0,591210286 |
| NM_001302505.1 | 1,272885939 |
| NM_001302939.1 | 0,764567508 |
| NM_001302956.1 | 0,89507036  |
| NM_001302966.1 | 0,415694732 |
| NM_001303408.1 | 0,657553486 |
| NM_001304266.1 | 0,941012155 |
| NM_001304267.1 | 1,062450952 |
| NM_001304270.1 | 1,21145322  |
| NM_001304362.1 | 0,872958938 |
| NM_001304456.1 | 0,332555786 |
| NM_001304720.1 | 1,247084197 |
| NM_001305003.1 | 0,443407715 |
| NM_001305804.1 | 1,371792617 |
| NM_001305844.1 | 0,591210286 |
| NM_001305936.1 | 1,232412618 |
| NM_001306069.1 | 1,279616828 |
| NM_001306178.1 | 0,230230929 |
| NM_001306218.1 | 0,598600415 |
| NM_001308425.1 | 0,948426265 |
| NM_001308450.1 | 0,942241393 |
| NM_001308482.1 | 0,898520291 |
| NM_001308487.1 | 0,554259643 |
| NM_001308489.1 | 1,122375777 |
| NM_001308506.1 | 0,693657133 |
| NM_001309401.1 | 0,645549467 |
| NM_001309841.1 | 0,997667358 |
| NM_001310070.1 | 0,981312155 |
| NM_001310083.1 | 1,450579525 |
| NM_001310331.1 | 0,691240955 |
| NM_001310480.1 | 0,453485163 |
| NM_001310521.1 | 0,923766072 |
| NM_001310688.1 | 0,904861092 |
| NM_001310723.1 | 0,933301722 |
| NM_001310726.1 | 0,997667358 |
| NM_001310750.1 | 0,795016176 |
| NM_001310767.1 | 0,997667358 |
| NM_001311144.1 | 0,69836715  |
| NM_001311147.1 | 1,377731113 |
| NM_001311790.1 | 0,564548295 |
| NM_001313695.1 | 0,332555786 |

|                |             |
|----------------|-------------|
| NM_001313714.1 | 0,679262882 |
| NM_001313765.1 | 1,995334715 |
| NM_001313894.1 | 1,448993067 |
| NM_001313967.1 | 1,122375777 |
| NM_001313983.1 | 0,987128618 |
| NM_001313984.1 | 3,242418912 |
| NM_001316711.1 | 1,425239082 |
| NM_001316712.1 | 1,163945251 |
| NM_001316718.1 | 1,330223144 |
| NM_001316719.1 | 1,381385572 |
| NM_001316750.1 | 2,17672878  |
| NM_001317042.1 | 0,949504106 |
| NM_001317355.1 | 1,795801244 |
| NM_001317385.1 | 0,554259643 |
| NM_001317726.1 | 0,391940748 |
| NM_001324535.1 | 0,498833679 |
| NM_001324550.1 | 1,095569295 |
| NM_001326287.1 | 0,91766573  |
| NM_001326560.1 | 2,43874243  |
| NM_001326599.1 | 1,247084197 |
| NM_001327821.1 | 0,657553486 |
| NM_007376.4    | 0,860307359 |
| NM_007381.4    | 1,102659425 |
| NM_007382.5    | 1,071161284 |
| NM_007383.3    | 1,073328346 |
| NM_007386.2    | 1,044355866 |
| NM_007387.2    | 0,872958938 |
| NM_007392.3    | 0,700892891 |
| NM_007393.5    | 0,720882207 |
| NM_007395.3    | 0,796946187 |
| NM_007396.4    | 0,619241808 |
| NM_007400.2    | 0,936798844 |
| NM_007408.3    | 0,653644131 |
| NM_007409.2    | 1,052173869 |
| NM_007412.2    | 0,895976745 |
| NM_007413.4    | 0,320678794 |
| NM_007414.3    | 0,987290431 |
| NM_007415.2    | 1,007373382 |
| NM_007417.4    | 0,498833679 |
| NM_007418.3    | 0,886815429 |
| NM_007419.2    | 0,906658115 |
| NM_007420.3    | 1,300238606 |
| NM_007421.2    | 1,033939372 |
| NM_007422.3    | 0,609685607 |
| NM_007426.4    | 0,592876094 |
| NM_007428.3    | 0,801157121 |
| NM_007435.2    | 0,877993303 |
| NM_007438.4    | 0,762922097 |
| NM_007443.4    | 0,588367929 |
| NM_007444.3    | 0,748250518 |
| NM_007450.4    | 1,036441704 |
| NM_007451.4    | 1,015404358 |
| NM_007452.2    | 1,002556752 |
| NM_007468.2    | 0,997667358 |
| NM_007472.2    | 1,038825666 |
| NM_007473.4    | 0,957324734 |

|             |             |
|-------------|-------------|
| NM_007475.5 | 0,868436086 |
| NM_007479.3 | 0,932472598 |
| NM_007480.1 | 0,968464025 |
| NM_007481.3 | 0,835629034 |
| NM_007482.3 | 1,312720207 |
| NM_007483.2 | 0,926523344 |
| NM_007485.4 | 0,517309    |
| NM_007487.3 | 0,665111572 |
| NM_007494.3 | 0,842148623 |
| NM_007496.2 | 1,467157879 |
| NM_007497.3 | 0,648483782 |
| NM_007498.3 | 0,403506824 |
| NM_007500.4 | 1,184729987 |
| NM_007502.4 | 0,910733688 |
| NM_007505.2 | 1,063242317 |
| NM_007507.2 | 1,026980579 |
| NM_007508.5 | 0,498833679 |
| NM_007509.3 | 0,865318818 |
| NM_007510.2 | 0,926256969 |
| NM_007512.4 | 0,659475033 |
| NM_007523.2 | 0,88566925  |
| NM_007528.3 | 0,711354536 |
| NM_007534.3 | 0,443407715 |
| NM_007536.2 | 0,418376634 |
| NM_007545.2 | 1,710286899 |
| NM_007549.2 | 1,45115252  |
| NM_007551.2 | 0,498833679 |
| NM_007552.4 | 1,089759729 |
| NM_007555.4 | 0,621497698 |
| NM_007556.3 | 1,110577854 |
| NM_007557.3 | 0,586863152 |
| NM_007561.4 | 3,824391538 |
| NM_007564.5 | 0,864236772 |
| NM_007567.2 | 0,285047816 |
| NM_007568.5 | 1,245530198 |
| NM_007569.2 | 0,9126096   |
| NM_007570.2 | 1,036282655 |
| NM_007572.2 | 0,548093756 |
| NM_007573.2 | 0,983698544 |
| NM_007574.2 | 0,460461857 |
| NM_007582.2 | 0,64365636  |
| NM_007590.3 | 0,880616797 |
| NM_007591.3 | 0,776421348 |
| NM_007592.3 | 1,157740852 |
| NM_007596.2 | 0,928310803 |
| NM_007603.3 | 0,598600415 |
| NM_007604.2 | 0,866863477 |
| NM_007606.3 | 1,500355144 |
| NM_007618.3 | 0,570095633 |
| NM_007620.2 | 1,229379211 |
| NM_007625.2 | 1,070588361 |
| NM_007630.2 | 0,303637891 |
| NM_007633.2 | 0,652944897 |
| NM_007635.4 | 1,005415629 |
| NM_007637.2 | 0,453485163 |
| NM_007638.4 | 0,910859172 |

|             |             |
|-------------|-------------|
| NM_007639.3 | 0,408136646 |
| NM_007641.5 | 0,516649167 |
| NM_007642.4 | 0,57243209  |
| NM_007644.4 | 0,951541438 |
| NM_007646.5 | 0,913855221 |
| NM_007649.4 | 0,322774733 |
| NM_007651.3 | 0,372540499 |
| NM_007655.3 | 0,989489756 |
| NM_007657.3 | 0,586908399 |
| NM_007659.3 | 0,458926985 |
| NM_007662.2 | 1,41336209  |
| NM_007664.5 | 1,077027261 |
| NM_007669.5 | 0,748250518 |
| NM_007670.4 | 0,920923715 |
| NM_007672.2 | 1,060021568 |
| NM_007679.4 | 0,855143449 |
| NM_007682.3 | 0,965666465 |
| NM_007684.3 | 0,803676483 |
| NM_007687.5 | 0,751839799 |
| NM_007689.4 | 0,793017643 |
| NM_007690.3 | 0,995382274 |
| NM_007694.4 | 2,137858624 |
| NM_007696.2 | 0,935313148 |
| NM_007702.2 | 1,125180838 |
| NM_007703.2 | 1,202486484 |
| NM_007710.2 | 0,535426031 |
| NM_007713.4 | 0,682165715 |
| NM_007721.4 | 1,14918226  |
| NM_007725.2 | 0,698288159 |
| NM_007734.2 | 0,945840482 |
| NM_007737.2 | 0,38753712  |
| NM_007739.2 | 0,586338581 |
| NM_007742.4 | 0,309605892 |
| NM_007743.3 | 0,379072365 |
| NM_007747.2 | 1,128251347 |
| NM_007748.3 | 1,061098309 |
| NM_007749.3 | 1,082279435 |
| NM_007750.2 | 1,084126184 |
| NM_007751.3 | 1,080298503 |
| NM_007754.2 | 0,89552219  |
| NM_007756.3 | 1,662778929 |
| NM_007757.2 | 0,889181171 |
| NM_007759.2 | 1,330223144 |
| NM_007760.3 | 1,041985226 |
| NM_007761.2 | 0,997667358 |
| NM_007763.3 | 0,543218614 |
| NM_007764.5 | 0,681333805 |
| NM_007768.4 | 0,938981043 |
| NM_007771.3 | 1,358891746 |
| NM_007789.3 | 0,982078805 |
| NM_007790.3 | 0,975487114 |
| NM_007791.5 | 0,80189026  |
| NM_007792.4 | 1,214906442 |
| NM_007793.3 | 0,808376877 |
| NM_007798.3 | 0,754988949 |
| NM_007799.3 | 0,685896308 |

|             |             |
|-------------|-------------|
| NM_007808.4 | 1,081743399 |
| NM_007812.4 | 0,673425466 |
| NM_007817.2 | 0,936013757 |
| NM_007818.3 | 0,548717047 |
| NM_007819.4 | 0,598600415 |
| NM_007823.2 | 0,753964577 |
| NM_007832.4 | 0,717500497 |
| NM_007833.6 | 0,399066943 |
| NM_007834.3 | 0,822795326 |
| NM_007836.1 | 0,688865556 |
| NM_007838.2 | 0,790588503 |
| NM_007853.4 | 0,969278449 |
| NM_007855.3 | 0,842856906 |
| NM_007857.5 | 0,798133886 |
| NM_007861.5 | 1,012204123 |
| NM_007873.3 | 0,320006511 |
| NM_007874.3 | 1,022493672 |
| NM_007876.2 | 0,712619541 |
| NM_007881.4 | 0,860272337 |
| NM_007885.2 | 0,948953131 |
| NM_007888.3 | 0,843099176 |
| NM_007891.5 | 1,662778929 |
| NM_007895.2 | 0,427571725 |
| NM_007896.3 | 0,861892662 |
| NM_007898.3 | 1,000992916 |
| NM_007901.5 | 0,964321041 |
| NM_007906.2 | 0,500402338 |
| NM_007907.2 | 0,982453774 |
| NM_007909.3 | 0,997667358 |
| NM_007910.2 | 0,883648231 |
| NM_007911.5 | 0,872958938 |
| NM_007913.5 | 1,443733017 |
| NM_007916.2 | 1,058749033 |
| NM_007918.3 | 0,915194342 |
| NM_007922.5 | 1,045846818 |
| NM_007924.2 | 0,934554581 |
| NM_007926.2 | 0,916733344 |
| NM_007927.3 | 0,804242054 |
| NM_007929.2 | 0,698531511 |
| NM_007930.4 | 1,022320142 |
| NM_007933.3 | 1,080806304 |
| NM_007934.3 | 0,963988141 |
| NM_007948.2 | 0,756473051 |
| NM_007949.4 | 1,078148895 |
| NM_007952.2 | 0,748250518 |
| NM_007954.4 | 0,824738349 |
| NM_007955.3 | 0,997667358 |
| NM_007974.4 | 0,578647067 |
| NM_007976.3 | 0,573658731 |
| NM_007978.3 | 1,070955718 |
| NM_007981.4 | 0,665111572 |
| NM_007983.2 | 0,95348541  |
| NM_007984.2 | 0,619085105 |
| NM_007988.3 | 0,91463643  |
| NM_007991.3 | 0,983696727 |
| NM_007994.3 | 0,982466738 |

|             |             |
|-------------|-------------|
| NM_007996.2 | 0,951479054 |
| NM_008001.4 | 0,424932393 |
| NM_008002.4 | 0,993173361 |
| NM_008008.4 | 0,475079694 |
| NM_008012.1 | 0,752232928 |
| NM_008013.4 | 0,904685765 |
| NM_008014.3 | 0,98992461  |
| NM_008021.4 | 0,303457155 |
| NM_008026.5 | 0,977911568 |
| NM_008029.3 | 0,950300361 |
| NM_008033.3 | 0,982090824 |
| NM_008037.4 | 0,838267558 |
| NM_008043.3 | 1,040909906 |
| NM_008044.2 | 1,070201847 |
| NM_008047.5 | 0,498100747 |
| NM_008055.4 | 1,011759968 |
| NM_008057.3 | 0,978894047 |
| NM_008058.2 | 1,173203485 |
| NM_008059.3 | 0,890845362 |
| NM_008061.4 | 1,140191266 |
| NM_008062.2 | 0,916365323 |
| NM_008063.2 | 0,641357587 |
| NM_008081.3 | 0,702062215 |
| NM_008082.2 | 1,127797883 |
| NM_008085.2 | 1,184729987 |
| NM_008086.2 | 1,012369824 |
| NM_008096.2 | 0,917210313 |
| NM_008098.4 | 0,821709825 |
| NM_008102.3 | 0,819679754 |
| NM_008108.4 | 0,249416839 |
| NM_008109.2 | 1,150125908 |
| NM_008112.4 | 0,911140185 |
| NM_008113.3 | 0,890391298 |
| NM_008120.3 | 0,909711797 |
| NM_008122.3 | 2,59393513  |
| NM_008123.3 | 0,460461857 |
| NM_008125.3 | 1,296967565 |
| NM_008129.4 | 0,918285181 |
| NM_008131.4 | 1,432251901 |
| NM_008133.4 | 1,007144975 |
| NM_008136.2 | 0,849412593 |
| NM_008137.4 | 2,993002073 |
| NM_008138.4 | 0,789199552 |
| NM_008139.5 | 0,919751909 |
| NM_008143.3 | 0,847862216 |
| NM_008148.4 | 0,272091098 |
| NM_008149.3 | 2,660446287 |
| NM_008150.2 | 0,997667358 |
| NM_008152.3 | 0,618119993 |
| NM_008153.3 | 0,724720628 |
| NM_008155.4 | 0,882168206 |
| NM_008158.1 | 0,786040948 |
| NM_008160.6 | 0,917017467 |
| NM_008161.3 | 1,084987767 |
| NM_008168.2 | 0,813886529 |
| NM_008175.4 | 0,679911033 |

|             |             |
|-------------|-------------|
| NM_008176.3 | 0,693616353 |
| NM_008179.2 | 0,88542978  |
| NM_008183.3 | 0,895606596 |
| NM_008187.2 | 0,902581759 |
| NM_008197.3 | 1,065978506 |
| NM_008202.2 | 0,901118904 |
| NM_008205.1 | 1,190199655 |
| NM_008207.3 | 0,852174201 |
| NM_008210.5 | 0,901720418 |
| NM_008212.4 | 1,057556529 |
| NM_008214.4 | 0,924200932 |
| NM_008216.3 | 0,460461857 |
| NM_008218.2 | 0,844840933 |
| NM_008220.5 | 0,794313295 |
| NM_008225.2 | 0,61946666  |
| NM_008226.2 | 0,971865616 |
| NM_008228.2 | 0,88610818  |
| NM_008229.2 | 1,235207205 |
| NM_008231.4 | 0,948551426 |
| NM_008235.2 | 0,970408687 |
| NM_008239.4 | 1,163945251 |
| NM_008245.3 | 0,68107425  |
| NM_008248.2 | 1,023991035 |
| NM_008250.2 | 0,957123546 |
| NM_008251.3 | 0,939004678 |
| NM_008252.3 | 2,993002073 |
| NM_008256.4 | 0,869326654 |
| NM_008258.1 | 0,650869354 |
| NM_008265.3 | 1,087468371 |
| NM_008268.2 | 0,779689616 |
| NM_008270.2 | 1,330223144 |
| NM_008277.2 | 1,264285358 |
| NM_008278.2 | 0,785886307 |
| NM_008287.3 | 0,913886412 |
| NM_008289.2 | 0,415694732 |
| NM_008292.4 | 0,954454181 |
| NM_008299.3 | 1,082374964 |
| NM_008300.3 | 0,960927013 |
| NM_008302.3 | 0,979786531 |
| NM_008303.4 | 1,137861895 |
| NM_008304.2 | 0,898432239 |
| NM_008317.4 | 1,15576453  |
| NM_008321.2 | 0,860864371 |
| NM_008326.1 | 1,470246632 |
| NM_008331.3 | 0,771420389 |
| NM_008338.3 | 0,868412277 |
| NM_008344.3 | 0,734733918 |
| NM_008364.2 | 0,66251348  |
| NM_008367.3 | 1,13327263  |
| NM_008379.3 | 0,877721494 |
| NM_008381.3 | 0,571433886 |
| NM_008384.2 | 0,408136646 |
| NM_008388.2 | 0,939448042 |
| NM_008389.3 | 0,821608412 |
| NM_008396.2 | 1,127797883 |
| NM_008398.2 | 0,920923715 |



|             |             |
|-------------|-------------|
| NM_008399.2 | 0,861621809 |
| NM_008403.4 | 1,074411001 |
| NM_008409.2 | 0,737611885 |
| NM_008410.2 | 0,907330697 |
| NM_008415.6 | 1,048710804 |
| NM_008416.3 | 0,904212897 |
| NM_008421.3 | 0,783881495 |
| NM_008423.2 | 1,095477883 |
| NM_008425.4 | 0,438465272 |
| NM_008437.1 | 0,485351688 |
| NM_008445.2 | 0,837884695 |
| NM_008448.3 | 0,904704527 |
| NM_008449.2 | 0,665111572 |
| NM_008452.2 | 0,941826555 |
| NM_008455.3 | 1,054676921 |
| NM_008466.5 | 0,899889888 |
| NM_008467.4 | 0,905249511 |
| NM_008489.2 | 0,500667626 |
| NM_008490.2 | 0,558017336 |
| NM_008491.1 | 0,369180872 |
| NM_008494.3 | 0,662343157 |
| NM_008495.2 | 0,793685342 |
| NM_008498.2 | 0,498833679 |
| NM_008503.5 | 0,936503058 |
| NM_008508.2 | 1,163945251 |
| NM_008509.2 | 1,067156369 |
| NM_008512.2 | 0,763891001 |
| NM_008513.3 | 0,914292087 |
| NM_008514.4 | 0,994976414 |
| NM_008516.4 | 0,332555786 |
| NM_008517.2 | 0,718320498 |
| NM_008518.2 | 0,658460456 |
| NM_008520.2 | 1,168000809 |
| NM_008524.2 | 0,562856944 |
| NM_008528.4 | 0,490203338 |
| NM_008533.2 | 0,522587664 |
| NM_008536.3 | 0,900069464 |
| NM_008537.4 | 1,54061558  |
| NM_008538.2 | 0,797988797 |
| NM_008549.2 | 0,715498812 |
| NM_008550.2 | 0,892385878 |
| NM_008551.2 | 1,034971505 |
| NM_008553.4 | 1,156715777 |
| NM_008562.3 | 0,805797001 |
| NM_008563.2 | 0,516649167 |
| NM_008564.2 | 0,480169834 |
| NM_008565.3 | 0,698508263 |
| NM_008569.2 | 0,354010998 |
| NM_008580.4 | 0,69836715  |
| NM_008584.3 | 0,878608712 |
| NM_008592.2 | 1,160551824 |
| NM_008593.3 | 1,474812616 |
| NM_008594.2 | 0,831389465 |
| NM_008596.1 | 0,797131205 |
| NM_008597.3 | 0,983108464 |
| NM_008599.4 | 1,046713355 |

|             |             |
|-------------|-------------|
| NM_008607.2 | 0,311771049 |
| NM_008608.4 | 0,559155312 |
| NM_008609.4 | 0,986470855 |
| NM_008611.4 | 0,352117891 |
| NM_008615.2 | 0,813886529 |
| NM_008617.2 | 1,026433898 |
| NM_008621.3 | 0,83823592  |
| NM_008624.3 | 0,748250518 |
| NM_008625.2 | 0,361241641 |
| NM_008628.2 | 1,021392374 |
| NM_008630.2 | 0,7415675   |
| NM_008634.2 | 0,545547201 |
| NM_008636.4 | 0,941171394 |
| NM_008640.2 | 0,927379169 |
| NM_008650.3 | 1,046950092 |
| NM_008654.2 | 0,892067486 |
| NM_008655.1 | 0,843948218 |
| NM_008657.2 | 0,613949143 |
| NM_008667.3 | 0,831389465 |
| NM_008668.2 | 1,282715174 |
| NM_008672.3 | 1,514976358 |
| NM_008679.3 | 0,914126774 |
| NM_008681.2 | 0,899798681 |
| NM_008683.3 | 0,967025361 |
| NM_008695.2 | 0,558878474 |
| NM_008704.2 | 0,969369884 |
| NM_008705.5 | 0,64663625  |
| NM_008706.5 | 0,719471652 |
| NM_008709.3 | 0,479271574 |
| NM_008711.2 | 1,371792617 |
| NM_008714.3 | 0,856701403 |
| NM_008721.4 | 0,660954624 |
| NM_008723.1 | 0,997667358 |
| NM_008727.5 | 0,824046571 |
| NM_008730.2 | 0,742943777 |
| NM_008737.2 | 0,939574791 |
| NM_008738.2 | 1,079443371 |
| NM_008740.4 | 0,813674989 |
| NM_008744.2 | 0,577504878 |
| NM_008748.3 | 0,690692786 |
| NM_008750.5 | 1,022661112 |
| NM_008760.4 | 0,804534849 |
| NM_008764.3 | 0,498833679 |
| NM_008768.2 | 0,90375959  |
| NM_008772.5 | 0,808919479 |
| NM_008774.3 | 0,662736173 |
| NM_008777.3 | 1,101591041 |
| NM_008784.3 | 0,951879677 |
| NM_008799.2 | 0,94034796  |
| NM_008800.2 | 0,356309771 |
| NM_008803.2 | 1,113691031 |
| NM_008806.2 | 0,399066943 |
| NM_008808.3 | 0,598600415 |
| NM_008810.3 | 1,005337261 |
| NM_008820.2 | 0,879522539 |
| NM_008823.4 | 0,523366483 |

|             |             |
|-------------|-------------|
| NM_008825.4 | 0,849245908 |
| NM_008826.4 | 0,841284085 |
| NM_008828.3 | 1,002331877 |
| NM_008831.4 | 1,051733509 |
| NM_008839.2 | 0,997667358 |
| NM_008842.3 | 1,344949849 |
| NM_008850.2 | 0,871367957 |
| NM_008854.5 | 0,880656989 |
| NM_008857.3 | 1,039659162 |
| NM_008867.2 | 1,173726303 |
| NM_008871.2 | 0,513808673 |
| NM_008872.3 | 0,589925046 |
| NM_008877.3 | 0,658654178 |
| NM_008878.2 | 0,954290516 |
| NM_008881.2 | 0,945270782 |
| NM_008887.2 | 0,886815429 |
| NM_008889.2 | 1,019127479 |
| NM_008891.2 | 0,925160259 |
| NM_008898.2 | 0,383718214 |
| NM_008906.4 | 0,581972625 |
| NM_008907.1 | 0,860840658 |
| NM_008908.4 | 0,684702487 |
| NM_008909.2 | 0,69102501  |
| NM_008910.3 | 0,739125512 |
| NM_008919.4 | 0,410804206 |
| NM_008921.2 | 0,777751435 |
| NM_008924.2 | 0,899282201 |
| NM_008926.4 | 0,997667358 |
| NM_008927.3 | 0,795016176 |
| NM_008928.4 | 1,030922936 |
| NM_008929.3 | 0,901855831 |
| NM_008939.2 | 1,639024945 |
| NM_008944.2 | 0,999685293 |
| NM_008945.3 | 0,996194182 |
| NM_008946.4 | 0,939879832 |
| NM_008947.3 | 0,90260704  |
| NM_008948.2 | 0,952032462 |
| NM_008950.1 | 0,976975694 |
| NM_008954.2 | 0,831389465 |
| NM_008959.3 | 0,960487208 |
| NM_008960.2 | 0,932338345 |
| NM_008963.2 | 0,886815429 |
| NM_008964.4 | 0,505667017 |
| NM_008966.3 | 0,970703375 |
| NM_008967.3 | 0,453485163 |
| NM_008968.3 | 0,912959752 |
| NM_008970.4 | 0,561187889 |
| NM_008972.2 | 0,774391062 |
| NM_008981.3 | 0,832409575 |
| NM_008984.2 | 0,958077383 |
| NM_008986.2 | 0,86899143  |
| NM_008987.3 | 0,962455569 |
| NM_008989.3 | 1,043015874 |
| NM_008990.3 | 0,998816744 |
| NM_008991.2 | 1,058132046 |
| NM_008992.2 | 0,930597283 |

|             |             |
|-------------|-------------|
| NM_008993.2 | 1,688360144 |
| NM_008996.3 | 0,927429561 |
| NM_008997.3 | 0,796777669 |
| NM_009000.3 | 0,859102447 |
| NM_009008.3 | 0,482094294 |
| NM_009009.4 | 1,330223144 |
| NM_009011.4 | 0,883707792 |
| NM_009012.2 | 0,823402317 |
| NM_009022.4 | 0,332555786 |
| NM_009026.5 | 0,977908559 |
| NM_009027.3 | 0,81091598  |
| NM_009028.2 | 1,091974222 |
| NM_009029.2 | 0,90574311  |
| NM_009030.3 | 0,789819991 |
| NM_009031.3 | 0,909576196 |
| NM_009037.2 | 0,728048531 |
| NM_009044.2 | 0,827851637 |
| NM_009045.4 | 0,960716715 |
| NM_009047.5 | 0,712619541 |
| NM_009054.3 | 2,59393513  |
| NM_009057.3 | 0,770924776 |
| NM_009061.4 | 1,320400422 |
| NM_009062.3 | 0,971921103 |
| NM_009063.4 | 0,90565432  |
| NM_009066.3 | 0,950342111 |
| NM_009067.5 | 1,558855246 |
| NM_009068.3 | 0,71564125  |
| NM_009072.2 | 0,759485511 |
| NM_009073.4 | 1,2170618   |
| NM_009075.2 | 0,857139254 |
| NM_009076.3 | 0,820853205 |
| NM_009080.2 | 0,876388376 |
| NM_009084.4 | 0,850126996 |
| NM_009085.2 | 0,992970242 |
| NM_009087.2 | 0,968787513 |
| NM_009088.3 | 0,888610602 |
| NM_009090.5 | 1,122240372 |
| NM_009092.3 | 0,902743092 |
| NM_009093.2 | 0,897740995 |
| NM_009095.2 | 0,921728294 |
| NM_009096.3 | 0,84256781  |
| NM_009098.2 | 0,815467967 |
| NM_009101.2 | 0,675839178 |
| NM_009103.3 | 0,863988953 |
| NM_009104.2 | 0,415113341 |
| NM_009107.3 | 2,194868187 |
| NM_009115.3 | 1,119156081 |
| NM_009119.3 | 1,001509466 |
| NM_009127.4 | 0,786606066 |
| NM_009128.2 | 0,867849707 |
| NM_009131.3 | 0,545335123 |
| NM_009135.2 | 0,892605505 |
| NM_009137.2 | 0,684965649 |
| NM_009139.3 | 0,381521055 |
| NM_009140.2 | 0,816273293 |
| NM_009141.3 | 1,205514724 |

|             |             |
|-------------|-------------|
| NM_009142.3 | 0,756071952 |
| NM_009144.2 | 0,306974572 |
| NM_009148.3 | 0,969707253 |
| NM_009149.2 | 0,828153518 |
| NM_009150.3 | 1,156242281 |
| NM_009156.2 | 0,836996383 |
| NM_009169.2 | 0,89072785  |
| NM_009171.2 | 0,665111572 |
| NM_009174.3 | 0,818311428 |
| NM_009179.3 | 0,566576524 |
| NM_009189.3 | 0,866557068 |
| NM_009190.2 | 0,872958938 |
| NM_009196.4 | 1,044570243 |
| NM_009197.2 | 1,13224195  |
| NM_009199.2 | 1,199726569 |
| NM_009201.2 | 1,296403911 |
| NM_009202.5 | 1,81394065  |
| NM_009203.3 | 1,416043992 |
| NM_009204.2 | 0,427571725 |
| NM_009211.2 | 0,904136043 |
| NM_009219.3 | 0,904136043 |
| NM_009226.4 | 0,90924212  |
| NM_009227.3 | 0,876310367 |
| NM_009228.2 | 0,901492688 |
| NM_009229.4 | 0,870963603 |
| NM_009231.2 | 0,900928955 |
| NM_009234.6 | 0,412827872 |
| NM_009236.2 | 0,866938532 |
| NM_009238.2 | 0,861381233 |
| NM_009244.4 | 0,759645196 |
| NM_009245.2 | 1,004743013 |
| NM_009246.3 | 0,911330759 |
| NM_009247.2 | 0,786040948 |
| NM_009251.1 | 1,08836439  |
| NM_009256.3 | 0,855143449 |
| NM_009264.2 | 0,458387705 |
| NM_009266.3 | 1,079474591 |
| NM_009270.3 | 1,006429806 |
| NM_009272.4 | 0,966515214 |
| NM_009273.4 | 0,923431479 |
| NM_009275.4 | 0,968901663 |
| NM_009284.2 | 0,966490253 |
| NM_009285.3 | 0,596488949 |
| NM_009297.2 | 0,892649741 |
| NM_009298.3 | 0,851315328 |
| NM_009302.3 | 0,858861464 |
| NM_009303.2 | 0,850575375 |
| NM_009304.2 | 0,883116185 |
| NM_009305.2 | 1,077219918 |
| NM_009314.4 | 1,496501037 |
| NM_009317.3 | 3,791135959 |
| NM_009321.2 | 0,968166441 |
| NM_009324.2 | 0,883922316 |
| NM_009336.2 | 1,579639983 |
| NM_009338.3 | 1,124651802 |
| NM_009342.2 | 0,647969521 |

|             |             |
|-------------|-------------|
| NM_009344.3 | 0,752457549 |
| NM_009349.3 | 1,367391143 |
| NM_009351.2 | 0,962925985 |
| NM_009359.4 | 0,997667358 |
| NM_009360.4 | 1,071025252 |
| NM_009366.4 | 0,707529402 |
| NM_009368.3 | 0,805014351 |
| NM_009369.4 | 0,620427503 |
| NM_009372.3 | 0,498833679 |
| NM_009373.3 | 0,896101587 |
| NM_009378.3 | 0,846221765 |
| NM_009381.3 | 1,117897249 |
| NM_009382.3 | 0,508046966 |
| NM_009388.6 | 0,952904821 |
| NM_009393.2 | 0,985350477 |
| NM_009394.2 | 0,533552911 |
| NM_009396.2 | 0,633350626 |
| NM_009398.2 | 0,642941186 |
| NM_009399.3 | 0,342948154 |
| NM_009402.2 | 0,760127511 |
| NM_009404.3 | 0,498833679 |
| NM_009408.2 | 0,929000095 |
| NM_009409.2 | 0,939489566 |
| NM_009410.2 | 1,377731113 |
| NM_009415.2 | 0,949500303 |
| NM_009416.4 | 0,691155097 |
| NM_009423.4 | 0,810604728 |
| NM_009425.2 | 0,975802387 |
| NM_009426.3 | 1,08836439  |
| NM_009427.2 | 1,035572652 |
| NM_009429.3 | 0,912796496 |
| NM_009431.2 | 0,945210641 |
| NM_009433.3 | 0,904492264 |
| NM_009435.2 | 1,765103787 |
| NM_009437.4 | 1,246666413 |
| NM_009438.5 | 0,916897153 |
| NM_009439.1 | 0,98143818  |
| NM_009443.3 | 0,982861496 |
| NM_009448.4 | 0,530597976 |
| NM_009450.2 | 0,671367172 |
| NM_009451.3 | 0,691849725 |
| NM_009453.3 | 0,816273293 |
| NM_009454.2 | 1,02439059  |
| NM_009455.3 | 0,731622729 |
| NM_009458.4 | 0,889811427 |
| NM_009460.2 | 0,969564052 |
| NM_009463.3 | 1,117263515 |
| NM_009464.3 | 1,117540633 |
| NM_009466.2 | 0,997667358 |
| NM_009467.3 | 1,197200829 |
| NM_009474.5 | 1,124132234 |
| NM_009480.3 | 1,056353673 |
| NM_009497.3 | 1,045987429 |
| NM_009498.4 | 0,94826664  |
| NM_009503.4 | 0,955230165 |
| NM_009504.4 | 1,406547422 |

|             |             |
|-------------|-------------|
| NM_009506.2 | 0,754333856 |
| NM_009507.3 | 0,863638252 |
| NM_009509.2 | 1,32382784  |
| NM_009510.2 | 0,662901899 |
| NM_009512.2 | 1,137690846 |
| NM_009515.2 | 0,508296648 |
| NM_009520.3 | 0,929644583 |
| NM_009523.2 | 0,383718214 |
| NM_009524.3 | 0,997667358 |
| NM_009531.2 | 0,992486592 |
| NM_009536.4 | 0,908149573 |
| NM_009537.3 | 0,960579352 |
| NM_009538.2 | 0,750183982 |
| NM_009546.2 | 0,997667358 |
| NM_009547.2 | 1,160078323 |
| NM_009551.5 | 1,122748041 |
| NM_009564.2 | 1,01289892  |
| NM_009573.3 | 1,282715174 |
| NM_009577.3 | 0,984540156 |
| NM_009579.3 | 0,820592199 |
| NM_009592.1 | 0,912356135 |
| NM_009593.2 | 0,65606511  |
| NM_009602.4 | 0,8731101   |
| NM_009605.4 | 1,072879531 |
| NM_009608.4 | 0,598600415 |
| NM_009610.2 | 0,551342487 |
| NM_009620.2 | 0,554259643 |
| NM_009621.5 | 0,874766306 |
| NM_009622.1 | 0,621189109 |
| NM_009627.1 | 0,675839178 |
| NM_009633.3 | 0,963265035 |
| NM_009634.6 | 0,973334007 |
| NM_009637.4 | 1,810581501 |
| NM_009641.1 | 0,532089257 |
| NM_009650.2 | 0,844180072 |
| NM_009654.4 | 0,781183674 |
| NM_009656.4 | 1,067623316 |
| NM_009658.3 | 0,883138439 |
| NM_009662.2 | 0,563388626 |
| NM_009665.5 | 0,926691596 |
| NM_009671.5 | 0,976663834 |
| NM_009673.2 | 0,793749434 |
| NM_009675.2 | 0,858671905 |
| NM_009676.2 | 1,046710808 |
| NM_009679.3 | 1,852810807 |
| NM_009682.3 | 0,960782551 |
| NM_009687.2 | 0,969832292 |
| NM_009690.2 | 0,285047816 |
| NM_009692.4 | 0,977512462 |
| NM_009693.2 | 1,060021568 |
| NM_009694.3 | 0,70695634  |
| NM_009697.3 | 0,936013757 |
| NM_009698.2 | 0,652715533 |
| NM_009699.3 | 1,383861174 |
| NM_009701.4 | 0,532089257 |
| NM_009702.3 | 0,969162576 |

|             |             |
|-------------|-------------|
| NM_009708.1 | 0,6198525   |
| NM_009712.3 | 0,967634914 |
| NM_009713.4 | 0,932515733 |
| NM_009720.2 | 0,982887101 |
| NM_009721.6 | 1,086882667 |
| NM_009724.2 | 0,633518772 |
| NM_009729.3 | 0,883501691 |
| NM_009731.2 | 0,935313148 |
| NM_009735.3 | 0,827805657 |
| NM_009739.3 | 0,972948594 |
| NM_009740.2 | 0,884139693 |
| NM_009741.5 | 0,759231134 |
| NM_009742.3 | 0,7759635   |
| NM_009745.2 | 0,99855051  |
| NM_009748.2 | 1,070072552 |
| NM_009759.4 | 0,743359992 |
| NM_009760.4 | 0,989041019 |
| NM_009767.2 | 0,894013606 |
| NM_009769.4 | 0,453485163 |
| NM_009775.4 | 0,95310449  |
| NM_009777.2 | 0,473736063 |
| NM_009778.3 | 0,94358563  |
| NM_009779.2 | 0,36425472  |
| NM_009786.2 | 0,955898987 |
| NM_009787.2 | 0,714792162 |
| NM_009789.2 | 0,264687258 |
| NM_009790.5 | 0,74600352  |
| NM_009794.3 | 0,807286659 |
| NM_009797.2 | 0,306974572 |
| NM_009802.2 | 0,166277893 |
| NM_009804.2 | 0,947871025 |
| NM_009805.4 | 0,498833679 |
| NM_009807.2 | 0,607774367 |
| NM_009811.4 | 0,990286341 |
| NM_009813.2 | 0,535951974 |
| NM_009818.1 | 0,757353323 |
| NM_009831.2 | 0,903709418 |
| NM_009834.2 | 1,084963251 |
| NM_009836.1 | 0,911141674 |
| NM_009837.1 | 0,903162975 |
| NM_009838.2 | 0,914916911 |
| NM_009840.3 | 0,938755388 |
| NM_009841.4 | 0,800420803 |
| NM_009846.2 | 0,595530669 |
| NM_009849.2 | 0,895140277 |
| NM_009861.3 | 0,894383592 |
| NM_009864.3 | 1,662778929 |
| NM_009870.3 | 0,932602095 |
| NM_009871.2 | 0,943249138 |
| NM_009873.3 | 0,984836873 |
| NM_009874.3 | 1,001072366 |
| NM_009875.4 | 0,942703276 |
| NM_009884.3 | 0,937934573 |
| NM_009888.3 | 0,74465316  |
| NM_009890.1 | 0,506508043 |
| NM_009892.3 | 0,264088418 |



|             |             |
|-------------|-------------|
| NM_009902.4 | 0,581972625 |
| NM_009906.6 | 0,825402688 |
| NM_009908.2 | 0,830616079 |
| NM_009909.3 | 1,219371215 |
| NM_009910.3 | 0,199533472 |
| NM_009912.4 | 0,340666903 |
| NM_009917.5 | 0,406193138 |
| NM_009925.4 | 0,530010784 |
| NM_009930.2 | 0,406597251 |
| NM_009932.4 | 0,680255625 |
| NM_009933.4 | 0,444616985 |
| NM_009938.4 | 0,837648698 |
| NM_009940.3 | 1,465960199 |
| NM_009942.2 | 1,11377285  |
| NM_009943.2 | 0,477145258 |
| NM_009944.3 | 1,10978861  |
| NM_009945.3 | 1,047159994 |
| NM_009946.3 | 0,621922509 |
| NM_009948.2 | 0,99426235  |
| NM_009949.2 | 1,003894865 |
| NM_009955.3 | 0,157526425 |
| NM_009963.4 | 0,969318883 |
| NM_009974.3 | 1,060021568 |
| NM_009976.4 | 1,014663456 |
| NM_009977.3 | 0,665111572 |
| NM_009982.5 | 0,524063706 |
| NM_009983.2 | 0,82963793  |
| NM_009984.4 | 0,924155026 |
| NM_009987.4 | 0,685896308 |
| NM_009993.3 | 0,712619541 |
| NM_009994.1 | 0,487160504 |
| NM_009999.4 | 2,485213619 |
| NM_010001.2 | 0,272091098 |
| NM_010006.2 | 1,020868924 |
| NM_010008.4 | 1,095798573 |
| NM_010011.3 | 0,593849618 |
| NM_010012.3 | 0,824159991 |
| NM_010015.4 | 0,809701044 |
| NM_010019.3 | 1,9366484   |
| NM_010023.4 | 1,183115292 |
| NM_010027.1 | 1,158576226 |
| NM_010043.2 | 0,921279367 |
| NM_010044.3 | 0,827333906 |
| NM_010045.2 | 0,701656164 |
| NM_010049.3 | 0,782365284 |
| NM_010050.3 | 1,424983021 |
| NM_010062.3 | 0,744889105 |
| NM_010073.2 | 0,968838992 |
| NM_010074.3 | 0,427571725 |
| NM_010090.2 | 0,440829763 |
| NM_010094.3 | 0,926405404 |
| NM_010098.3 | 1,870626296 |
| NM_010101.4 | 0,718599565 |
| NM_010102.2 | 1,228532531 |
| NM_010104.4 | 0,723376063 |
| NM_010106.2 | 0,894048629 |

|             |             |
|-------------|-------------|
| NM_010110.5 | 0,972156003 |
| NM_010119.5 | 0,903634967 |
| NM_010123.3 | 0,872627869 |
| NM_010133.2 | 1,108519286 |
| NM_010134.3 | 1,317432536 |
| NM_010137.3 | 1,017314167 |
| NM_010139.3 | 1,182018935 |
| NM_010140.3 | 0,634879228 |
| NM_010146.2 | 0,964612114 |
| NM_010150.2 | 0,987008518 |
| NM_010153.1 | 1,39111364  |
| NM_010155.3 | 0,886815429 |
| NM_010162.2 | 0,960448178 |
| NM_010169.3 | 1,028992784 |
| NM_010170.4 | 0,249416839 |
| NM_010171.3 | 0,973259594 |
| NM_010172.4 | 0,300111319 |
| NM_010174.1 | 1,124087094 |
| NM_010175.5 | 0,890471184 |
| NM_010176.4 | 0,85590681  |
| NM_010180.2 | 0,762922097 |
| NM_010185.4 | 0,437149944 |
| NM_010186.5 | 0,41150078  |
| NM_010192.4 | 1,052001699 |
| NM_010193.4 | 0,966675708 |
| NM_010200.3 | 0,438973637 |
| NM_010208.4 | 0,332555786 |
| NM_010209.2 | 1,087206983 |
| NM_010213.3 | 0,399066943 |
| NM_010214.4 | 0,498833679 |
| NM_010217.2 | 0,818598858 |
| NM_010218.2 | 1,089759729 |
| NM_010219.3 | 1,034963334 |
| NM_010220.4 | 0,867536833 |
| NM_010226.2 | 0,6301057   |
| NM_010228.3 | 0,976846773 |
| NM_010229.2 | 0,367561658 |
| NM_010231.2 | 1,181238151 |
| NM_010234.2 | 0,748250518 |
| NM_010235.2 | 1,330223144 |
| NM_010240.2 | 0,68942418  |
| NM_010242.3 | 0,730057761 |
| NM_010244.3 | 1,061531877 |
| NM_010246.1 | 0,72557626  |
| NM_010260.1 | 0,939663442 |
| NM_010261.2 | 0,928020439 |
| NM_010271.2 | 1,035916407 |
| NM_010272.1 | 1,035315182 |
| NM_010273.4 | 1,001514009 |
| NM_010276.4 | 0,893837723 |
| NM_010280.4 | 1,015806764 |
| NM_010281.2 | 0,914528411 |
| NM_010288.3 | 0,975124774 |
| NM_010296.2 | 1,405804004 |
| NM_010299.3 | 0,874406066 |
| NM_010301.3 | 0,953024039 |

|             |             |
|-------------|-------------|
| NM_010302.2 | 0,958349593 |
| NM_010303.3 | 0,969569548 |
| NM_010305.1 | 0,918196306 |
| NM_010306.3 | 0,777762514 |
| NM_010308.3 | 1,008992787 |
| NM_010312.4 | 0,877947275 |
| NM_010316.3 | 0,897900622 |
| NM_010318.2 | 1,010080567 |
| NM_010322.3 | 1,073777351 |
| NM_010324.2 | 0,879860014 |
| NM_010325.2 | 0,668006266 |
| NM_010330.4 | 0,361588434 |
| NM_010331.2 | 1,222947084 |
| NM_010332.2 | 0,826056938 |
| NM_010344.4 | 0,886866726 |
| NM_010351.1 | 0,816273293 |
| NM_010353.2 | 0,491604205 |
| NM_010357.3 | 1,155193783 |
| NM_010360.2 | 0,968984421 |
| NM_010362.3 | 1,008811202 |
| NM_010369.3 | 1,291098933 |
| NM_010370.2 | 0,872958938 |
| NM_010378.2 | 0,715870674 |
| NM_010380.3 | 0,843963776 |
| NM_010382.2 | 0,80654059  |
| NM_010385.2 | 1,795801244 |
| NM_010387.3 | 0,648483782 |
| NM_010388.4 | 1,108519286 |
| NM_010391.4 | 0,798685894 |
| NM_010398.3 | 0,924776559 |
| NM_010401.4 | 0,607275783 |
| NM_010403.2 | 0,6301057   |
| NM_010414.3 | 0,886815429 |
| NM_010415.2 | 0,67518902  |
| NM_010422.2 | 0,806957763 |
| NM_010423.2 | 0,489763976 |
| NM_010425.3 | 0,96548454  |
| NM_010436.2 | 0,666612952 |
| NM_010439.4 | 0,906970325 |
| NM_010442.2 | 0,447593627 |
| NM_010451.2 | 1,041360819 |
| NM_010453.5 | 1,073313981 |
| NM_010454.1 | 1,323436291 |
| NM_010455.2 | 1,274640165 |
| NM_010459.7 | 0,874754739 |
| NM_010460.2 | 0,946504929 |
| NM_010466.2 | 1,16440842  |
| NM_010468.2 | 0,7759635   |
| NM_010469.2 | 0,68952706  |
| NM_010473.2 | 0,481632518 |
| NM_010477.4 | 0,748250518 |
| NM_010478.2 | 0,540337894 |
| NM_010479.2 | 0,501641373 |
| NM_010480.5 | 0,929329739 |
| NM_010481.2 | 0,988100976 |
| NM_010493.2 | 0,631343441 |

|             |             |
|-------------|-------------|
| NM_010496.3 | 1,131736458 |
| NM_010499.4 | 1,009532579 |
| NM_010500.2 | 0,717507821 |
| NM_010508.2 | 0,861314985 |
| NM_010511.2 | 0,961859112 |
| NM_010514.3 | 0,166277893 |
| NM_010515.2 | 0,84055675  |
| NM_010516.2 | 0,970529663 |
| NM_010517.3 | 0,786599821 |
| NM_010518.2 | 0,731636474 |
| NM_010531.1 | 1,048829786 |
| NM_010544.3 | 2,59393513  |
| NM_010546.2 | 1,163945251 |
| NM_010560.3 | 0,897862817 |
| NM_010564.4 | 3,242418912 |
| NM_010570.4 | 1,057724137 |
| NM_010571.3 | 1,163385863 |
| NM_010573.2 | 0,451325709 |
| NM_010574.3 | 0,378425549 |
| NM_010575.2 | 0,799749542 |
| NM_010576.3 | 0,747121935 |
| NM_010578.2 | 0,805333603 |
| NM_010579.2 | 0,956910847 |
| NM_010582.3 | 0,538740373 |
| NM_010590.5 | 0,924962854 |
| NM_010591.2 | 0,81086318  |
| NM_010593.2 | 0,997667358 |
| NM_010595.3 | 1,197200829 |
| NM_010596.2 | 0,748250518 |
| NM_010599.4 | 1,84184743  |
| NM_010602.3 | 1,140191266 |
| NM_010608.2 | 1,159242783 |
| NM_010612.2 | 0,879582932 |
| NM_010613.3 | 0,906906364 |
| NM_010615.1 | 0,278281103 |
| NM_010633.3 | 0,878329157 |
| NM_010635.2 | 1,745917876 |
| NM_010637.3 | 0,720587245 |
| NM_010638.4 | 1,103302725 |
| NM_010655.3 | 0,793526824 |
| NM_010656.2 | 1,463245458 |
| NM_010658.3 | 0,776278063 |
| NM_010681.4 | 0,733246468 |
| NM_010683.2 | 0,733263463 |
| NM_010685.4 | 0,882964679 |
| NM_010690.1 | 0,951592239 |
| NM_010692.3 | 0,722448776 |
| NM_010696.3 | 0,497165339 |
| NM_010697.1 | 1,042008129 |
| NM_010706.2 | 0,498833679 |
| NM_010708.2 | 1,425239082 |
| NM_010709.3 | 0,598600415 |
| NM_010720.3 | 1,995334715 |
| NM_010721.2 | 0,511328549 |
| NM_010722.5 | 0,665111572 |
| NM_010723.3 | 0,920071008 |

|             |             |
|-------------|-------------|
| NM_010724.2 | 0,936154149 |
| NM_010726.2 | 1,105427834 |
| NM_010728.3 | 0,704235782 |
| NM_010729.3 | 0,757957639 |
| NM_010730.2 | 0,456662221 |
| NM_010732.4 | 0,793017643 |
| NM_010734.2 | 0,41902029  |
| NM_010736.3 | 1,042922372 |
| NM_010740.3 | 0,701405731 |
| NM_010742.1 | 0,920923715 |
| NM_010745.2 | 0,591502386 |
| NM_010749.6 | 0,880361536 |
| NM_010750.3 | 0,634879228 |
| NM_010753.2 | 1,014487535 |
| NM_010756.3 | 1,263711986 |
| NM_010757.2 | 1,330223144 |
| NM_010763.2 | 0,875504008 |
| NM_010764.2 | 0,603851295 |
| NM_010765.2 | 0,996758735 |
| NM_010771.6 | 0,964696236 |
| NM_010779.2 | 0,828420217 |
| NM_010780.3 | 0,556692131 |
| NM_010791.3 | 0,654249197 |
| NM_010798.2 | 0,775455852 |
| NM_010799.2 | 0,920721935 |
| NM_010807.4 | 0,640778222 |
| NM_010809.2 | 0,81682745  |
| NM_010816.1 | 0,40381774  |
| NM_010817.2 | 0,948709924 |
| NM_010822.3 | 1,019534039 |
| NM_010828.3 | 0,940917224 |
| NM_010830.2 | 0,967317103 |
| NM_010831.2 | 0,82624     |
| NM_010833.2 | 0,712909206 |
| NM_010834.3 | 0,528176836 |
| NM_010835.2 | 0,638043078 |
| NM_010851.2 | 0,903243961 |
| NM_010855.3 | 0,606888764 |
| NM_010859.2 | 0,742707922 |
| NM_010865.3 | 0,447395194 |
| NM_010871.2 | 0,44767125  |
| NM_010879.3 | 0,8373957   |
| NM_010880.3 | 1,064704295 |
| NM_010882.3 | 1,153799743 |
| NM_010885.5 | 0,998760093 |
| NM_010886.2 | 1,106941759 |
| NM_010887.2 | 1,106914635 |
| NM_010890.3 | 0,862078338 |
| NM_010893.3 | 0,922805609 |
| NM_010897.2 | 0,685896308 |
| NM_010902.4 | 0,862257379 |
| NM_010903.1 | 0,940981712 |
| NM_010907.2 | 0,950159388 |
| NM_010917.2 | 0,646690256 |
| NM_010922.2 | 0,950394965 |
| NM_010926.5 | 1,008070937 |

|             |             |
|-------------|-------------|
| NM_010928.2 | 0,877729205 |
| NM_010930.4 | 0,529278927 |
| NM_010941.3 | 0,984776589 |
| NM_010947.3 | 1,21651052  |
| NM_010948.3 | 0,993780342 |
| NM_010959.2 | 0,860058067 |
| NM_011016.2 | 0,498833679 |
| NM_011018.3 | 0,906970325 |
| NM_011029.4 | 0,886128046 |
| NM_011032.2 | 0,668029841 |
| NM_011034.4 | 0,93189989  |
| NM_011044.2 | 1,127550815 |
| NM_011045.2 | 0,735293799 |
| NM_011053.2 | 0,986609468 |
| NM_011059.2 | 0,767436429 |
| NM_011072.4 | 0,745928931 |
| NM_011074.3 | 1,247084197 |
| NM_011075.2 | 0,878982422 |
| NM_011078.3 | 0,968394009 |
| NM_011082.3 | 1,08569683  |
| NM_011100.4 | 0,997667358 |
| NM_011101.3 | 0,780227036 |
| NM_011105.2 | 0,584491987 |
| NM_011109.2 | 0,697000483 |
| NM_011119.3 | 0,929239589 |
| NM_011121.4 | 0,255085404 |
| NM_011122.3 | 0,791584168 |
| NM_011125.2 | 0,721194683 |
| NM_011131.3 | 0,924491343 |
| NM_011136.2 | 0,740204814 |
| NM_011141.2 | 0,469490521 |
| NM_011144.6 | 1,109474906 |
| NM_011145.3 | 0,961008883 |
| NM_011149.2 | 0,747026687 |
| NM_011150.2 | 0,697312999 |
| NM_011151.2 | 1,111654239 |
| NM_011155.2 | 0,613949143 |
| NM_011156.2 | 0,756971387 |
| NM_011158.3 | 1,06367019  |
| NM_011161.5 | 0,759460264 |
| NM_011163.4 | 0,855143449 |
| NM_011171.2 | 0,487748486 |
| NM_011172.2 | 1,690899455 |
| NM_011173.3 | 0,718320498 |
| NM_011178.2 | 1,425239082 |
| NM_011185.3 | 0,999382668 |
| NM_011186.1 | 0,863386532 |
| NM_011187.1 | 0,96811276  |
| NM_011188.3 | 0,916215733 |
| NM_011189.1 | 0,985135384 |
| NM_011192.3 | 0,927409093 |
| NM_011198.4 | 0,36278813  |
| NM_011204.2 | 0,855986786 |
| NM_011215.2 | 1,296967565 |
| NM_011220.2 | 1,076685334 |
| NM_011221.3 | 0,925833207 |

|             |             |
|-------------|-------------|
| NM_011224.2 | 0,566478849 |
| NM_011234.4 | 0,529374516 |
| NM_011239.2 | 0,888626531 |
| NM_011240.3 | 0,9161504   |
| NM_011243.2 | 0,446324871 |
| NM_011246.2 | 0,997667358 |
| NM_011254.5 | 0,852552106 |
| NM_011263.2 | 0,742167181 |
| NM_011267.3 | 0,798133886 |
| NM_011270.3 | 0,234745261 |
| NM_011273.2 | 0,911893262 |
| NM_011274.5 | 0,846505637 |
| NM_011278.5 | 0,739012858 |
| NM_011284.3 | 0,794715754 |
| NM_011289.3 | 0,921171847 |
| NM_011291.5 | 0,860424792 |
| NM_011292.2 | 0,901351611 |
| NM_011293.2 | 1,014679956 |
| NM_011295.6 | 0,842336042 |
| NM_011296.2 | 0,845842271 |
| NM_011300.3 | 0,86885461  |
| NM_011309.3 | 1,030374941 |
| NM_011313.2 | 0,438213427 |
| NM_011315.3 | 0,448950311 |
| NM_011316.3 | 0,598600415 |
| NM_011317.4 | 0,885816763 |
| NM_011319.3 | 1,026172139 |
| NM_011324.2 | 2,494168394 |
| NM_011330.3 | 0,778343757 |
| NM_011331.2 | 0,580039161 |
| NM_011333.3 | 0,426580828 |
| NM_011336.1 | 1,458129215 |
| NM_011337.2 | 0,498833679 |
| NM_011338.2 | 0,353308693 |
| NM_011340.3 | 0,57083162  |
| NM_011342.4 | 0,930131708 |
| NM_011347.2 | 0,801404927 |
| NM_011348.2 | 0,660221046 |
| NM_011352.2 | 0,859831736 |
| NM_011353.2 | 0,777842347 |
| NM_011361.3 | 1,296967565 |
| NM_011369.2 | 0,346558135 |
| NM_011373.3 | 0,613949143 |
| NM_011377.2 | 1,029850176 |
| NM_011395.2 | 0,994303678 |
| NM_011397.4 | 0,332555786 |
| NM_011399.3 | 1,045113638 |
| NM_011403.2 | 1,587198069 |
| NM_011404.3 | 0,51054339  |
| NM_011407.1 | 0,491159315 |
| NM_011408.1 | 0,529410174 |
| NM_011409.1 | 0,76137772  |
| NM_011412.3 | 0,714201838 |
| NM_011413.2 | 0,846857176 |
| NM_011415.2 | 0,749252192 |
| NM_011421.2 | 1,077296278 |

|             |             |
|-------------|-------------|
| NM_011426.3 | 0,408136646 |
| NM_011427.3 | 0,478048942 |
| NM_011430.3 | 0,379540878 |
| NM_011432.2 | 0,973171061 |
| NM_011434.1 | 1,048905976 |
| NM_011435.3 | 0,932695158 |
| NM_011436.3 | 0,894877387 |
| NM_011437.1 | 1,453743864 |
| NM_011438.2 | 0,98533144  |
| NM_011439.2 | 0,665111572 |
| NM_011446.1 | 0,796788285 |
| NM_011447.3 | 1,884482787 |
| NM_011448.4 | 0,685896308 |
| NM_011452.2 | 0,230230929 |
| NM_011458.2 | 0,763432413 |
| NM_011461.3 | 0,51308607  |
| NM_011465.4 | 0,453485163 |
| NM_011467.2 | 1,02809288  |
| NM_011479.4 | 0,843058089 |
| NM_011481.3 | 1,365229016 |
| NM_011482.4 | 1,00191501  |
| NM_011484.2 | 1,0875473   |
| NM_011485.4 | 0,950656854 |
| NM_011489.3 | 0,617603602 |
| NM_011491.3 | 0,793017643 |
| NM_011498.4 | 0,830259284 |
| NM_011499.3 | 0,951004806 |
| NM_011503.4 | 0,876455436 |
| NM_011504.1 | 0,927996254 |
| NM_011505.2 | 0,719679549 |
| NM_011508.2 | 0,97081729  |
| NM_011512.3 | 0,861525117 |
| NM_011513.2 | 1,071596301 |
| NM_011517.2 | 0,88185191  |
| NM_011519.2 | 0,906970325 |
| NM_011520.3 | 0,864645043 |
| NM_011521.2 | 1,166040167 |
| NM_011522.3 | 0,864645043 |
| NM_011528.4 | 0,974585079 |
| NM_011530.3 | 1,046879649 |
| NM_011538.2 | 0,567733358 |
| NM_011540.2 | 0,605877717 |
| NM_011546.3 | 0,720537536 |
| NM_011571.3 | 0,964711994 |
| NM_011573.3 | 1,133712906 |
| NM_011577.2 | 0,604897125 |
| NM_011578.3 | 0,929296597 |
| NM_011579.3 | 1,565627801 |
| NM_011581.3 | 0,505016223 |
| NM_011582.3 | 0,358137    |
| NM_011584.4 | 0,952026732 |
| NM_011587.2 | 0,960034123 |
| NM_011588.3 | 0,881048767 |
| NM_011590.2 | 1,060787793 |
| NM_011592.2 | 1,057604299 |
| NM_011594.3 | 0,610644034 |



|             |             |
|-------------|-------------|
| NM_011595.2 | 0,835205637 |
| NM_011596.5 | 0,973687371 |
| NM_011605.3 | 0,84034289  |
| NM_011606.2 | 0,770733755 |
| NM_011609.4 | 0,862963283 |
| NM_011610.3 | 0,537032654 |
| NM_011614.3 | 0,863199149 |
| NM_011626.2 | 0,780148203 |
| NM_011630.3 | 1,247084197 |
| NM_011631.1 | 0,739297612 |
| NM_011633.2 | 0,663253718 |
| NM_011637.6 | 1,376092907 |
| NM_011638.4 | 1,123954365 |
| NM_011639.3 | 0,794751963 |
| NM_011648.5 | 0,940368895 |
| NM_011650.3 | 0,907535416 |
| NM_011653.2 | 0,645524865 |
| NM_011655.5 | 0,643463912 |
| NM_011657.2 | 0,861621809 |
| NM_011658.2 | 0,903051908 |
| NM_011660.3 | 0,870169932 |
| NM_011662.2 | 0,414060788 |
| NM_011663.3 | 0,947290095 |
| NM_011664.4 | 0,7759635   |
| NM_011670.2 | 0,51308607  |
| NM_011671.5 | 0,697556039 |
| NM_011677.2 | 0,722448776 |
| NM_011680.2 | 1,184729987 |
| NM_011690.3 | 1,496501037 |
| NM_011692.2 | 0,920301949 |
| NM_011693.3 | 0,642476885 |
| NM_011694.5 | 0,598600415 |
| NM_011695.2 | 1,01025399  |
| NM_011698.1 | 0,682614508 |
| NM_011699.3 | 0,944957195 |
| NM_011701.4 | 0,711759153 |
| NM_011704.3 | 2,494168394 |
| NM_011707.2 | 0,933245556 |
| NM_011712.2 | 0,761107056 |
| NM_011714.2 | 0,826638668 |
| NM_011715.2 | 0,855706785 |
| NM_011716.2 | 0,861333181 |
| NM_011723.3 | 0,924567142 |
| NM_011724.3 | 1,177247482 |
| NM_011732.2 | 0,701063549 |
| NM_011734.3 | 0,891940163 |
| NM_011738.2 | 0,777707174 |
| NM_011739.3 | 0,985403629 |
| NM_011743.2 | 0,995448676 |
| NM_011746.2 | 0,752626252 |
| NM_011752.2 | 0,982271256 |
| NM_011755.2 | 0,878403588 |
| NM_011756.4 | 0,949496101 |
| NM_011758.2 | 0,937463293 |
| NM_011760.2 | 0,952022446 |
| NM_011762.3 | 1,076534342 |

|             |             |
|-------------|-------------|
| NM_011765.5 | 1,071179689 |
| NM_011779.3 | 0,596700096 |
| NM_011782.2 | 0,721779391 |
| NM_011784.3 | 0,79604817  |
| NM_011787.2 | 0,782343468 |
| NM_011796.2 | 1,085393281 |
| NM_011798.4 | 0,581972625 |
| NM_011800.4 | 1,852810807 |
| NM_011801.1 | 0,980558902 |
| NM_011803.2 | 0,758814405 |
| NM_011804.2 | 0,967448285 |
| NM_011809.3 | 0,842482262 |
| NM_011812.4 | 0,453485163 |
| NM_011814.2 | 0,954882054 |
| NM_011817.2 | 1,013609897 |
| NM_011820.4 | 1,360455488 |
| NM_011827.3 | 0,563898941 |
| NM_011829.3 | 1,995334715 |
| NM_011835.2 | 0,896278399 |
| NM_011836.3 | 1,018914872 |
| NM_011838.4 | 0,92631043  |
| NM_011839.3 | 0,984320637 |
| NM_011842.3 | 0,952318841 |
| NM_011843.2 | 0,746192673 |
| NM_011851.4 | 1,03206968  |
| NM_011859.3 | 0,627105196 |
| NM_011865.3 | 0,870475141 |
| NM_011874.2 | 0,958221516 |
| NM_011875.4 | 0,887931297 |
| NM_011876.3 | 0,885701339 |
| NM_011879.2 | 0,909506596 |
| NM_011881.3 | 1,496501037 |
| NM_011883.4 | 0,897900622 |
| NM_011890.4 | 0,949504106 |
| NM_011894.2 | 1,154834133 |
| NM_011897.3 | 1,214551566 |
| NM_011898.2 | 0,834737342 |
| NM_011899.4 | 0,766766179 |
| NM_011909.2 | 0,96041007  |
| NM_011910.2 | 0,7759635   |
| NM_011913.2 | 0,997667358 |
| NM_011914.2 | 0,880294727 |
| NM_011919.5 | 0,69836715  |
| NM_011920.3 | 0,855143449 |
| NM_011921.2 | 0,942387636 |
| NM_011933.2 | 1,172602727 |
| NM_011936.2 | 1,036206533 |
| NM_011937.2 | 0,818110327 |
| NM_011942.1 | 0,748250518 |
| NM_011945.2 | 0,793724307 |
| NM_011946.3 | 0,994868852 |
| NM_011947.3 | 0,448950311 |
| NM_011949.3 | 0,944783869 |
| NM_011952.2 | 0,880794717 |
| NM_011955.2 | 0,959295536 |
| NM_011957.2 | 0,587756204 |

|             |             |
|-------------|-------------|
| NM_011962.3 | 1,064178515 |
| NM_011965.2 | 0,999690077 |
| NM_011967.3 | 0,929998869 |
| NM_011968.3 | 0,609685607 |
| NM_011971.4 | 1,050268835 |
| NM_011975.3 | 0,927999299 |
| NM_011978.2 | 1,327165846 |
| NM_011979.2 | 1,496501037 |
| NM_011982.3 | 0,607275783 |
| NM_011986.4 | 0,570095633 |
| NM_011989.4 | 0,938496032 |
| NM_011992.2 | 0,797679368 |
| NM_011996.2 | 1,011523849 |
| NM_012000.3 | 0,710964692 |
| NM_012002.3 | 0,999366318 |
| NM_012006.2 | 1,456844803 |
| NM_012009.4 | 0,332555786 |
| NM_012010.3 | 0,908949529 |
| NM_012021.2 | 1,090243397 |
| NM_012028.4 | 0,997667358 |
| NM_012030.2 | 0,905810517 |
| NM_012032.4 | 0,867461851 |
| NM_012037.2 | 0,585440272 |
| NM_012039.2 | 1,496501037 |
| NM_012052.2 | 0,859331177 |
| NM_012053.2 | 0,89157867  |
| NM_012054.4 | 0,344023227 |
| NM_012056.2 | 0,844505085 |
| NM_012058.3 | 0,959152757 |
| NM_013415.5 | 1,071874021 |
| NM_013456.2 | 0,51385879  |
| NM_013460.4 | 1,106689184 |
| NM_013462.3 | 0,828252146 |
| NM_013463.2 | 0,626442294 |
| NM_013467.3 | 0,819560299 |
| NM_013468.3 | 0,712619541 |
| NM_013470.2 | 0,676949538 |
| NM_013476.4 | 1,022520281 |
| NM_013477.3 | 0,890801495 |
| NM_013478.2 | 1,151154643 |
| NM_013481.1 | 0,920960593 |
| NM_013484.2 | 0,781771232 |
| NM_013485.1 | 0,821608412 |
| NM_013486.2 | 0,561187889 |
| NM_013494.4 | 0,778514486 |
| NM_013497.3 | 0,851940665 |
| NM_013507.3 | 0,621189109 |
| NM_013508.2 | 0,676988564 |
| NM_013515.2 | 1,00606539  |
| NM_013518.4 | 1,068929312 |
| NM_013519.2 | 0,783881495 |
| NM_013526.1 | 1,584530509 |
| NM_013528.3 | 0,917518327 |
| NM_013529.3 | 0,749726358 |
| NM_013534.4 | 0,559037744 |
| NM_013535.1 | 1,03470314  |

|             |             |
|-------------|-------------|
| NM_013536.2 | 1,020192986 |
| NM_013541.1 | 0,894284344 |
| NM_013542.2 | 0,149650104 |
| NM_013543.2 | 1,069364937 |
| NM_013546.3 | 1,662778929 |
| NM_013548.4 | 1,396734301 |
| NM_013549.2 | 0,534464656 |
| NM_013555.4 | 0,773701216 |
| NM_013556.2 | 0,84113848  |
| NM_013557.2 | 1,108519286 |
| NM_013558.2 | 1,037397474 |
| NM_013560.2 | 0,946719231 |
| NM_013562.2 | 0,913204543 |
| NM_013564.7 | 0,934256297 |
| NM_013584.2 | 0,979179356 |
| NM_013586.4 | 0,497849786 |
| NM_013587.2 | 0,920008819 |
| NM_013590.4 | 0,4655781   |
| NM_013603.2 | 0,554259643 |
| NM_013605.2 | 0,853268135 |
| NM_013610.2 | 0,925136645 |
| NM_013611.4 | 0,498833679 |
| NM_013625.4 | 0,932246547 |
| NM_013632.4 | 1,133891645 |
| NM_013636.3 | 0,885895496 |
| NM_013642.3 | 0,946747214 |
| NM_013645.3 | 0,655609978 |
| NM_013647.2 | 0,876129684 |
| NM_013648.6 | 1,023921762 |
| NM_013650.2 | 0,954290516 |
| NM_013653.3 | 0,933301722 |
| NM_013654.3 | 0,366330983 |
| NM_013657.5 | 0,586723422 |
| NM_013658.3 | 0,443407715 |
| NM_013662.2 | 0,997667358 |
| NM_013667.2 | 0,908985815 |
| NM_013671.3 | 1,038719413 |
| NM_013675.3 | 0,627902533 |
| NM_013684.3 | 1,000550789 |
| NM_013686.4 | 1,108519286 |
| NM_013697.5 | 0,717423718 |
| NM_013706.2 | 0,457414276 |
| NM_013711.3 | 0,914470539 |
| NM_013712.2 | 0,754333856 |
| NM_013718.2 | 0,939699876 |
| NM_013723.3 | 0,93963398  |
| NM_013725.4 | 0,959815764 |
| NM_013733.3 | 0,700609099 |
| NM_013736.4 | 0,894765529 |
| NM_013743.2 | 1,003929462 |
| NM_013744.3 | 0,985196516 |
| NM_013745.5 | 0,702902002 |
| NM_013747.4 | 1,995334715 |
| NM_013750.2 | 0,938924856 |
| NM_013754.1 | 0,950159388 |
| NM_013759.2 | 0,951496386 |

|             |             |
|-------------|-------------|
| NM_013760.4 | 1,063527154 |
| NM_013765.2 | 0,801731244 |
| NM_013770.2 | 0,525136657 |
| NM_013771.5 | 0,997667358 |
| NM_013777.2 | 0,816273293 |
| NM_013779.2 | 0,901118904 |
| NM_013782.4 | 0,665111572 |
| NM_013785.2 | 0,979983003 |
| NM_013788.2 | 0,593207618 |
| NM_013795.5 | 1,005635122 |
| NM_013797.5 | 0,997667358 |
| NM_013805.4 | 0,761294146 |
| NM_013812.2 | 0,958275784 |
| NM_013815.2 | 1,197200829 |
| NM_013819.2 | 0,810793109 |
| NM_013820.3 | 0,923546454 |
| NM_013822.5 | 0,927243779 |
| NM_013825.3 | 0,518787026 |
| NM_013831.4 | 0,665111572 |
| NM_013835.2 | 0,859250328 |
| NM_013839.4 | 0,963265035 |
| NM_013841.3 | 1,01128739  |
| NM_013843.3 | 1,160551824 |
| NM_013846.3 | 1,111686484 |
| NM_013847.4 | 0,621189109 |
| NM_013859.2 | 0,966401429 |
| NM_013860.2 | 0,962972303 |
| NM_013863.5 | 0,879488934 |
| NM_013867.2 | 1,011334034 |
| NM_013868.4 | 0,474966039 |
| NM_013875.5 | 1,151154643 |
| NM_013876.3 | 0,917828735 |
| NM_013879.2 | 0,798133886 |
| NM_013881.4 | 1,01426748  |
| NM_013885.2 | 0,872350346 |
| NM_013886.4 | 0,805135061 |
| NM_013895.4 | 1,094388763 |
| NM_013897.2 | 0,935848982 |
| NM_013898.3 | 1,134602093 |
| NM_013899.2 | 1,095939891 |
| NM_013902.4 | 0,954115185 |
| NM_013904.1 | 1,03555346  |
| NM_013905.3 | 1,066287144 |
| NM_013909.2 | 1,130325318 |
| NM_013912.3 | 0,680227744 |
| NM_013913.4 | 1,076690515 |
| NM_013915.3 | 0,862847444 |
| NM_013917.2 | 1,031601622 |
| NM_013919.4 | 1,038418176 |
| NM_013922.4 | 0,836140262 |
| NM_013923.2 | 0,918701409 |
| NM_013924.3 | 1,069962094 |
| NM_013929.2 | 0,374125259 |
| NM_013930.4 | 0,570095633 |
| NM_015731.3 | 0,712619541 |
| NM_015734.2 | 0,748250518 |

|             |             |
|-------------|-------------|
| NM_015737.4 | 0,777099611 |
| NM_015751.2 | 1,41460297  |
| NM_015754.2 | 0,983554544 |
| NM_015769.2 | 0,863365983 |
| NM_015771.2 | 0,944962743 |
| NM_015774.3 | 0,799763122 |
| NM_015776.2 | 0,589530711 |
| NM_015779.2 | 2,288766291 |
| NM_015786.3 | 1,00310918  |
| NM_015787.4 | 0,751763431 |
| NM_015790.3 | 0,631855993 |
| NM_015791.3 | 1,071341255 |
| NM_015794.1 | 1,108008448 |
| NM_015797.4 | 1,064178515 |
| NM_015802.3 | 0,98542604  |
| NM_015811.2 | 0,290986313 |
| NM_015816.4 | 2,743585234 |
| NM_015818.2 | 0,915491411 |
| NM_015821.2 | 0,801157121 |
| NM_015822.2 | 0,479647768 |
| NM_015827.2 | 0,886851119 |
| NM_015828.3 | 1,048760834 |
| NM_016658.3 | 1,117387441 |
| NM_016661.3 | 0,954390867 |
| NM_016668.3 | 0,640547792 |
| NM_016671.3 | 0,935313148 |
| NM_016674.4 | 1,634476309 |
| NM_016676.5 | 0,986155811 |
| NM_016678.2 | 0,816273293 |
| NM_016679.4 | 1,08745742  |
| NM_016682.2 | 0,952567326 |
| NM_016687.3 | 0,299300207 |
| NM_016688.2 | 0,878066875 |
| NM_016690.4 | 0,983067348 |
| NM_016696.4 | 0,922371708 |
| NM_016697.3 | 0,891120358 |
| NM_016701.3 | 0,761783816 |
| NM_016706.2 | 0,955112826 |
| NM_016710.2 | 0,959552081 |
| NM_016714.2 | 0,912034626 |
| NM_016719.1 | 0,760873709 |
| NM_016720.2 | 1,005523006 |
| NM_016737.2 | 0,990897252 |
| NM_016738.5 | 0,869670481 |
| NM_016740.3 | 0,713778272 |
| NM_016741.2 | 1,049629199 |
| NM_016742.4 | 0,798133886 |
| NM_016753.4 | 0,639808414 |
| NM_016763.2 | 1,197374639 |
| NM_016766.3 | 1,596267772 |
| NM_016767.2 | 0,358137    |
| NM_016769.4 | 0,71454554  |
| NM_016772.1 | 1,035546272 |
| NM_016774.3 | 1,087006104 |
| NM_016776.2 | 0,965067231 |
| NM_016778.3 | 0,660571561 |

|             |             |
|-------------|-------------|
| NM_016783.4 | 0,945951413 |
| NM_016784.3 | 0,861046243 |
| NM_016789.3 | 0,586863152 |
| NM_016792.4 | 0,897606325 |
| NM_016794.3 | 0,950681454 |
| NM_016802.5 | 0,484581288 |
| NM_016803.3 | 0,5372055   |
| NM_016804.4 | 1,096383917 |
| NM_016809.6 | 1,032308585 |
| NM_016810.3 | 0,982841565 |
| NM_016843.3 | 0,954511263 |
| NM_016845.2 | 0,739766952 |
| NM_016847.2 | 1,241541601 |
| NM_016854.2 | 0,964665086 |
| NM_016858.2 | 0,946469449 |
| NM_016859.3 | 0,905555027 |
| NM_016860.1 | 0,929203329 |
| NM_016861.4 | 0,778880656 |
| NM_016866.2 | 0,748250518 |
| NM_016873.2 | 0,383314301 |
| NM_016876.3 | 0,95403759  |
| NM_016881.2 | 1,015973181 |
| NM_016890.4 | 1,995334715 |
| NM_016891.3 | 0,976931808 |
| NM_016892.3 | 1,178096561 |
| NM_016894.3 | 1,496501037 |
| NM_016896.3 | 0,969520003 |
| NM_016897.3 | 1,107482358 |
| NM_016898.2 | 0,862471983 |
| NM_016900.4 | 0,861980609 |
| NM_016904.1 | 0,598600415 |
| NM_016905.2 | 0,856176231 |
| NM_016906.4 | 0,874381876 |
| NM_016909.2 | 0,951543289 |
| NM_016910.3 | 1,094215812 |
| NM_016911.4 | 0,745426931 |
| NM_016924.2 | 0,800848627 |
| NM_016933.3 | 0,570095633 |
| NM_016957.3 | 0,728970942 |
| NM_016959.4 | 0,868754245 |
| NM_016963.2 | 0,80457045  |
| NM_016966.3 | 0,854791539 |
| NM_016968.4 | 1,470919822 |
| NM_016972.2 | 0,877947275 |
| NM_016974.3 | 0,885045843 |
| NM_016978.2 | 0,887688279 |
| NM_017366.3 | 1,070591355 |
| NM_017370.2 | 0,788056838 |
| NM_017371.2 | 1,115039988 |
| NM_017372.3 | 0,414432574 |
| NM_017374.3 | 0,666274354 |
| NM_017375.3 | 0,936275645 |
| NM_017378.2 | 0,901595686 |
| NM_017379.2 | 1,267886805 |
| NM_017382.5 | 0,868163698 |
| NM_017391.3 | 0,687236272 |

|             |             |
|-------------|-------------|
| NM_017393.2 | 1,143155915 |
| NM_017395.2 | 1,995334715 |
| NM_017399.4 | 0,757843474 |
| NM_017404.4 | 0,997667358 |
| NM_017406.4 | 0,85383188  |
| NM_017463.2 | 0,959387555 |
| NM_017472.4 | 0,859897308 |
| NM_017475.2 | 0,982876359 |
| NM_017476.2 | 0,851667257 |
| NM_018729.2 | 0,897900622 |
| NM_018738.4 | 1,238830115 |
| NM_018739.2 | 1,013233799 |
| NM_018740.2 | 0,498833679 |
| NM_018742.5 | 1,005724529 |
| NM_018753.6 | 0,657553486 |
| NM_018754.2 | 1,103054755 |
| NM_018763.2 | 1,052484245 |
| NM_018764.3 | 0,498833679 |
| NM_018765.3 | 0,937275871 |
| NM_018768.2 | 0,997667358 |
| NM_018771.3 | 0,965594604 |
| NM_018773.2 | 0,882842789 |
| NM_018779.1 | 1,829056822 |
| NM_018780.3 | 0,563898941 |
| NM_018783.4 | 0,939160292 |
| NM_018787.1 | 1,186699068 |
| NM_018789.2 | 1,034542127 |
| NM_018796.3 | 0,909088669 |
| NM_018797.2 | 0,655330519 |
| NM_018798.2 | 0,837184673 |
| NM_018799.2 | 0,941276302 |
| NM_018805.2 | 0,520905966 |
| NM_018807.5 | 0,970044646 |
| NM_018808.3 | 1,140191266 |
| NM_018811.6 | 0,902190176 |
| NM_018814.3 | 1,079556817 |
| NM_018815.2 | 0,805456215 |
| NM_018816.1 | 1,140191266 |
| NM_018819.4 | 0,985196516 |
| NM_018822.3 | 0,903601578 |
| NM_018826.2 | 0,632848697 |
| NM_018828.2 | 0,911269546 |
| NM_018829.4 | 1,197200829 |
| NM_018853.3 | 0,870544606 |
| NM_018854.4 | 0,914896283 |
| NM_018858.2 | 1,006000483 |
| NM_018860.4 | 0,888033582 |
| NM_018861.3 | 1,00744841  |
| NM_018862.3 | 0,872958938 |
| NM_018866.2 | 1,298849956 |
| NM_018870.3 | 0,747309323 |
| NM_018871.3 | 1,017300808 |
| NM_018884.2 | 0,896454727 |
| NM_019393.2 | 0,866606498 |
| NM_019402.2 | 0,925763404 |
| NM_019403.3 | 1,060739894 |



|             |             |
|-------------|-------------|
| NM_019405.6 | 0,916029114 |
| NM_019406.3 | 0,748250518 |
| NM_019410.3 | 1,059320958 |
| NM_019411.4 | 0,960867485 |
| NM_019418.3 | 0,748250518 |
| NM_019419.2 | 0,960057379 |
| NM_019420.2 | 0,932031347 |
| NM_019427.2 | 1,15223554  |
| NM_019431.2 | 2,630213943 |
| NM_019434.2 | 0,914359085 |
| NM_019437.3 | 0,914020434 |
| NM_019440.3 | 1,080486785 |
| NM_019442.3 | 1,062450952 |
| NM_019443.2 | 1,085846456 |
| NM_019444.2 | 0,843373457 |
| NM_019445.2 | 0,872958938 |
| NM_019454.3 | 0,920087479 |
| NM_019455.4 | 0,430291647 |
| NM_019458.3 | 1,005676155 |
| NM_019461.4 | 1,131807507 |
| NM_019472.2 | 0,855928273 |
| NM_019482.2 | 0,625987362 |
| NM_019484.4 | 1,163945251 |
| NM_019487.3 | 0,850724103 |
| NM_019488.4 | 2,106186644 |
| NM_019491.5 | 0,94199575  |
| NM_019496.3 | 0,766863715 |
| NM_019499.4 | 0,332555786 |
| NM_019502.2 | 1,197200829 |
| NM_019507.2 | 0,438535102 |
| NM_019510.2 | 1,360455488 |
| NM_019516.3 | 0,5372055   |
| NM_019518.3 | 0,620171601 |
| NM_019519.2 | 0,685896308 |
| NM_019521.2 | 0,778327081 |
| NM_019536.1 | 0,932602095 |
| NM_019537.2 | 0,951924506 |
| NM_019549.2 | 0,469630751 |
| NM_019551.2 | 0,947460072 |
| NM_019552.2 | 0,985102278 |
| NM_019561.2 | 1,026070699 |
| NM_019563.2 | 0,920923715 |
| NM_019564.3 | 0,727528198 |
| NM_019566.3 | 0,801168616 |
| NM_019573.3 | 1,068631145 |
| NM_019575.4 | 0,73760126  |
| NM_019580.4 | 1,09943852  |
| NM_019583.3 | 1,007168952 |
| NM_019588.2 | 0,945840482 |
| NM_019637.3 | 0,977424832 |
| NM_019639.4 | 0,953983275 |
| NM_019641.4 | 0,386717966 |
| NM_019648.3 | 0,847076058 |
| NM_019649.2 | 0,902146015 |
| NM_019651.2 | 0,901401209 |
| NM_019653.3 | 0,591035165 |

|             |             |
|-------------|-------------|
| NM_019657.4 | 1,029048589 |
| NM_019660.3 | 0,962391721 |
| NM_019661.4 | 0,974110175 |
| NM_019667.2 | 1,009834033 |
| NM_019673.2 | 0,332555786 |
| NM_019674.3 | 0,4655781   |
| NM_019682.4 | 0,772679495 |
| NM_019685.2 | 0,929830656 |
| NM_019686.5 | 1,155092936 |
| NM_019693.3 | 0,598600415 |
| NM_019694.1 | 0,948772294 |
| NM_019696.2 | 0,5708773   |
| NM_019697.3 | 1,371792617 |
| NM_019699.1 | 1,011879143 |
| NM_019704.2 | 0,918044114 |
| NM_019707.5 | 0,498833679 |
| NM_019710.2 | 1,263711986 |
| NM_019712.3 | 1,017976108 |
| NM_019713.4 | 0,757488179 |
| NM_019715.2 | 1,071568643 |
| NM_019719.3 | 0,994941491 |
| NM_019722.3 | 1,009162135 |
| NM_019727.2 | 0,838081067 |
| NM_019730.2 | 0,911111742 |
| NM_019735.4 | 1,108519286 |
| NM_019737.2 | 0,420472833 |
| NM_019738.1 | 0,83966574  |
| NM_019739.3 | 1,062427831 |
| NM_019742.4 | 1,044101943 |
| NM_019743.3 | 0,854412558 |
| NM_019745.4 | 0,965644581 |
| NM_019746.4 | 1,852810807 |
| NM_019747.4 | 1,016920587 |
| NM_019748.3 | 0,740262079 |
| NM_019749.4 | 0,924489253 |
| NM_019750.3 | 1,170863556 |
| NM_019752.3 | 0,939296052 |
| NM_019754.3 | 0,971412954 |
| NM_019755.5 | 0,663902278 |
| NM_019757.1 | 0,881821465 |
| NM_019759.2 | 0,652197526 |
| NM_019760.3 | 0,955144226 |
| NM_019767.2 | 1,048396206 |
| NM_019769.3 | 0,978643065 |
| NM_019770.2 | 0,941930971 |
| NM_019771.2 | 0,886522663 |
| NM_019772.2 | 0,634879228 |
| NM_019773.2 | 0,816273293 |
| NM_019775.3 | 0,653644131 |
| NM_019776.2 | 0,781546456 |
| NM_019781.2 | 0,983014932 |
| NM_019785.2 | 0,952561002 |
| NM_019788.3 | 0,933048467 |
| NM_019790.4 | 0,662966051 |
| NM_019791.2 | 0,908739786 |
| NM_019793.3 | 1,125843929 |

|             |             |
|-------------|-------------|
| NM_019794.4 | 0,985728994 |
| NM_019798.5 | 2,095101451 |
| NM_019802.5 | 1,197200829 |
| NM_019803.3 | 0,947501097 |
| NM_019805.4 | 1,027169596 |
| NM_019806.5 | 0,978127571 |
| NM_019821.2 | 0,670808459 |
| NM_019824.4 | 0,817909695 |
| NM_019829.4 | 0,635610655 |
| NM_019833.3 | 1,171503337 |
| NM_019835.2 | 0,618486352 |
| NM_019837.2 | 0,790459522 |
| NM_019861.1 | 1,113280144 |
| NM_019865.5 | 0,859089658 |
| NM_019869.3 | 1,118056268 |
| NM_019871.2 | 0,821608412 |
| NM_019877.2 | 0,935995712 |
| NM_019879.3 | 1,093887036 |
| NM_019883.3 | 1,031762595 |
| NM_019911.2 | 0,674892624 |
| NM_019912.2 | 1,05696025  |
| NM_019913.5 | 1,092520587 |
| NM_019914.4 | 0,783881495 |
| NM_019920.2 | 0,985138512 |
| NM_019922.2 | 0,878091668 |
| NM_019924.2 | 0,882443804 |
| NM_019927.2 | 1,041424698 |
| NM_019932.4 | 0,392037309 |
| NM_019936.3 | 0,898479219 |
| NM_019940.2 | 0,5372055   |
| NM_019943.2 | 1,080806304 |
| NM_019946.4 | 0,926405404 |
| NM_019949.2 | 0,694731925 |
| NM_019951.1 | 0,958730884 |
| NM_019953.1 | 0,675839178 |
| NM_019965.2 | 0,850294829 |
| NM_019967.2 | 0,892649741 |
| NM_019973.2 | 1,138278193 |
| NM_019975.3 | 1,015305401 |
| NM_019979.2 | 0,946241205 |
| NM_019986.3 | 1,018689849 |
| NM_019987.2 | 1,89556798  |
| NM_019989.2 | 0,858000358 |
| NM_019993.3 | 0,98463812  |
| NM_020003.1 | 0,943739392 |
| NM_020009.2 | 0,970410481 |
| NM_020010.2 | 1,108193251 |
| NM_020011.5 | 1,579639983 |
| NM_020021.2 | 0,579290724 |
| NM_020022.2 | 0,937379467 |
| NM_020025.4 | 1,003743286 |
| NM_020028.3 | 0,598600415 |
| NM_020034.2 | 1,351678356 |
| NM_020046.3 | 0,821608412 |
| NM_020048.3 | 0,964411779 |
| NM_020050.1 | 1,032808562 |

|             |             |
|-------------|-------------|
| NM_020255.3 | 0,926767139 |
| NM_020260.2 | 0,88955906  |
| NM_020262.3 | 0,937202669 |
| NM_020267.2 | 0,972852798 |
| NM_020271.3 | 0,711669382 |
| NM_020275.4 | 0,946581981 |
| NM_020278.2 | 1,160922016 |
| NM_020332.4 | 0,970708579 |
| NM_020333.2 | 1,330223144 |
| NM_020486.2 | 0,858759278 |
| NM_020491.5 | 0,935983623 |
| NM_020497.2 | 0,914528411 |
| NM_020507.3 | 1,049945851 |
| NM_020509.3 | 0,620876123 |
| NM_020510.2 | 0,910913674 |
| NM_020517.4 | 0,992140115 |
| NM_020518.2 | 0,953850886 |
| NM_020520.4 | 1,120239382 |
| NM_020557.4 | 1,076911812 |
| NM_020558.3 | 1,033298335 |
| NM_020560.2 | 1,053093322 |
| NM_020561.2 | 0,992802219 |
| NM_020569.3 | 0,944743694 |
| NM_020570.2 | 0,777734298 |
| NM_020575.2 | 1,007965859 |
| NM_020578.3 | 0,960431382 |
| NM_020579.2 | 1,060738283 |
| NM_020581.2 | 1,089523673 |
| NM_020582.2 | 1,088843778 |
| NM_020584.2 | 0,966578573 |
| NM_020586.2 | 0,802683509 |
| NM_020590.4 | 1,023296096 |
| NM_020593.2 | 1,179061423 |
| NM_020600.4 | 0,861489949 |
| NM_020604.2 | 0,834115332 |
| NM_020619.2 | 0,728027531 |
| NM_020625.3 | 1,033391124 |
| NM_021273.4 | 1,159479837 |
| NM_021274.2 | 0,903213643 |
| NM_021280.3 | 0,971705754 |
| NM_021282.2 | 1,973879503 |
| NM_021294.2 | 0,997667358 |
| NM_021296.2 | 0,844586123 |
| NM_021297.3 | 0,678247871 |
| NM_021299.1 | 1,036592337 |
| NM_021303.2 | 0,648483782 |
| NM_021310.3 | 0,924195731 |
| NM_021317.2 | 1,074411001 |
| NM_021320.3 | 1,036498722 |
| NM_021325.3 | 0,331286489 |
| NM_021334.2 | 0,460947577 |
| NM_021335.3 | 0,793910956 |
| NM_021336.4 | 0,735123316 |
| NM_021342.1 | 0,848761782 |
| NM_021350.2 | 0,976930623 |
| NM_021355.3 | 0,697755085 |

|             |             |
|-------------|-------------|
| NM_021361.1 | 0,78662234  |
| NM_021366.3 | 0,99486019  |
| NM_021384.4 | 0,985038657 |
| NM_021391.3 | 0,858861464 |
| NM_021394.2 | 0,489421723 |
| NM_021396.2 | 0,570095633 |
| NM_021397.2 | 1,648319982 |
| NM_021409.2 | 1,140191266 |
| NM_021416.3 | 1,496501037 |
| NM_021419.2 | 0,744527879 |
| NM_021420.3 | 0,554259643 |
| NM_021424.2 | 0,756401395 |
| NM_021427.2 | 0,855604692 |
| NM_021428.4 | 1,074084432 |
| NM_021430.2 | 0,983615705 |
| NM_021431.2 | 0,410804206 |
| NM_021432.2 | 0,864150537 |
| NM_021434.5 | 0,460461857 |
| NM_021437.2 | 1,095922476 |
| NM_021443.3 | 0,293431576 |
| NM_021447.2 | 0,390753048 |
| NM_021451.2 | 0,489763976 |
| NM_021455.4 | 0,941308745 |
| NM_021456.4 | 0,532089257 |
| NM_021457.3 | 0,864915965 |
| NM_021458.2 | 0,98637301  |
| NM_021463.4 | 0,91835489  |
| NM_021473.3 | 0,831729665 |
| NM_021487.1 | 1,274797179 |
| NM_021489.3 | 0,872958938 |
| NM_021495.4 | 0,665111572 |
| NM_021498.2 | 0,896512218 |
| NM_021499.2 | 1,132487271 |
| NM_021501.4 | 0,978512144 |
| NM_021502.2 | 1,090834737 |
| NM_021504.3 | 1,003652818 |
| NM_021506.2 | 0,900609221 |
| NM_021508.3 | 0,51777673  |
| NM_021509.5 | 1,033298335 |
| NM_021511.2 | 0,972825841 |
| NM_021513.2 | 0,968052    |
| NM_021518.3 | 0,961055712 |
| NM_021519.1 | 1,097434093 |
| NM_021521.2 | 1,055228626 |
| NM_021523.4 | 1,247084197 |
| NM_021524.2 | 1,195229731 |
| NM_021525.2 | 1,135087104 |
| NM_021526.2 | 0,913327928 |
| NM_021531.6 | 0,748250518 |
| NM_021534.3 | 1,239526111 |
| NM_021535.4 | 0,943796864 |
| NM_021538.1 | 0,948867058 |
| NM_021539.4 | 0,87505697  |
| NM_021542.4 | 1,122375777 |
| NM_021550.3 | 1,06668837  |
| NM_021552.5 | 0,870523227 |

|             |             |
|-------------|-------------|
| NM_021556.3 | 0,954979879 |
| NM_021557.5 | 0,896668934 |
| NM_021605.4 | 0,634879228 |
| NM_021608.3 | 0,959393674 |
| NM_021704.3 | 1,006496272 |
| NM_021713.2 | 0,967592146 |
| NM_021718.2 | 0,584839486 |
| NM_021719.4 | 0,790872383 |
| NM_021788.2 | 0,815401206 |
| NM_021789.2 | 0,909137148 |
| NM_021791.3 | 0,285047816 |
| NM_021884.3 | 0,332555786 |
| NM_021885.4 | 0,731622729 |
| NM_021890.3 | 0,573897855 |
| NM_021893.3 | 1,201964714 |
| NM_021899.3 | 0,916525198 |
| NM_021921.3 | 1,219371215 |
| NM_022004.6 | 0,896985331 |
| NM_022007.1 | 1,157294135 |
| NM_022018.3 | 1,037178936 |
| NM_022023.2 | 0,887432754 |
| NM_022028.2 | 0,966617141 |
| NM_022029.2 | 1,079507258 |
| NM_022030.3 | 0,498833679 |
| NM_022032.4 | 1,027899702 |
| NM_022311.2 | 0,199533472 |
| NM_022313.2 | 1,012988678 |
| NM_022324.3 | 0,431699334 |
| NM_022325.5 | 1,017678507 |
| NM_022409.2 | 1,007644031 |
| NM_022410.3 | 0,756944521 |
| NM_022415.3 | 0,868598504 |
| NM_022419.3 | 1,02230112  |
| NM_022420.2 | 1,054976971 |
| NM_022423.2 | 1,00584599  |
| NM_022430.2 | 0,554259643 |
| NM_022653.4 | 0,966425165 |
| NM_022814.2 | 1,005743712 |
| NM_022816.2 | 0,665111572 |
| NM_022880.3 | 1,53694701  |
| NM_022884.2 | 1,108519286 |
| NM_022889.3 | 0,681949839 |
| NM_022891.3 | 0,8799522   |
| NM_022984.4 | 0,650652625 |
| NM_022988.2 | 0,926405404 |
| NM_022989.4 | 0,969552052 |
| NM_022992.2 | 0,882744717 |
| NM_022993.3 | 0,941502381 |
| NM_022995.3 | 0,695809029 |
| NM_022997.4 | 0,894594742 |
| NM_023042.3 | 1,247084197 |
| NM_023044.2 | 0,534575656 |
| NM_023045.2 | 0,728358378 |
| NM_023049.1 | 0,50710164  |
| NM_023053.3 | 0,882825258 |
| NM_023054.1 | 0,924722905 |

|             |             |
|-------------|-------------|
| NM_023060.3 | 2,120043135 |
| NM_023065.3 | 0,556669468 |
| NM_023126.2 | 0,922924894 |
| NM_023135.2 | 0,544182195 |
| NM_023136.2 | 1,011919749 |
| NM_023137.3 | 0,35595167  |
| NM_023140.4 | 0,532089257 |
| NM_023141.2 | 0,793676953 |
| NM_023142.2 | 0,646540275 |
| NM_023143.3 | 0,740143279 |
| NM_023158.6 | 0,729064608 |
| NM_023172.3 | 1,129447933 |
| NM_023175.1 | 1,185967288 |
| NM_023182.2 | 0,682614508 |
| NM_023197.3 | 0,832409575 |
| NM_023203.1 | 0,933611669 |
| NM_023211.4 | 1,102952965 |
| NM_023220.2 | 0,907411459 |
| NM_023223.2 | 0,319715794 |
| NM_023231.2 | 1,052709853 |
| NM_023232.3 | 1,077434054 |
| NM_023239.4 | 1,054881256 |
| NM_023243.5 | 0,831389465 |
| NM_023245.3 | 0,976259202 |
| NM_023247.1 | 1,007411667 |
| NM_023258.4 | 0,340436255 |
| NM_023260.1 | 1,077862906 |
| NM_023270.5 | 0,96548454  |
| NM_023275.2 | 0,671614059 |
| NM_023277.4 | 0,85427546  |
| NM_023279.2 | 0,51801959  |
| NM_023281.1 | 1,095106609 |
| NM_023290.2 | 0,970107486 |
| NM_023294.2 | 0,302110538 |
| NM_023311.3 | 0,861096889 |
| NM_023322.2 | 1,157294135 |
| NM_023326.2 | 1,035855582 |
| NM_023331.2 | 1,004512417 |
| NM_023348.4 | 0,893837723 |
| NM_023371.3 | 0,953275998 |
| NM_023377.4 | 0,96565987  |
| NM_023380.2 | 0,419309469 |
| NM_023383.1 | 0,864645043 |
| NM_023386.5 | 1,163945251 |
| NM_023395.2 | 0,861621809 |
| NM_023402.2 | 0,862779933 |
| NM_023403.3 | 1,031365922 |
| NM_023409.4 | 0,85710397  |
| NM_023418.2 | 0,965731834 |
| NM_023422.3 | 1,023139716 |
| NM_023423.3 | 0,966388819 |
| NM_023431.5 | 1,829056822 |
| NM_023434.3 | 0,870953318 |
| NM_023449.3 | 0,834782891 |
| NM_023464.2 | 0,827081747 |
| NM_023465.4 | 0,997667358 |

|             |             |
|-------------|-------------|
| NM_023480.2 | 1,119207665 |
| NM_023500.2 | 1,04994687  |
| NM_023503.3 | 1,097434093 |
| NM_023537.5 | 1,108519286 |
| NM_023547.1 | 0,980783756 |
| NM_023554.2 | 0,982657317 |
| NM_023566.3 | 0,707084632 |
| NM_023580.4 | 0,864645043 |
| NM_023587.2 | 1,124489479 |
| NM_023605.2 | 0,805569916 |
| NM_023625.4 | 0,891106018 |
| NM_023627.1 | 0,733242628 |
| NM_023633.3 | 0,906970325 |
| NM_023645.3 | 0,789363184 |
| NM_023646.4 | 1,102684974 |
| NM_023651.4 | 0,997540782 |
| NM_023665.3 | 0,968728459 |
| NM_023671.2 | 0,958959363 |
| NM_023684.2 | 0,927319018 |
| NM_023716.2 | 0,464881648 |
| NM_023721.2 | 0,990633911 |
| NM_023731.3 | 0,92841496  |
| NM_023733.3 | 1,039289384 |
| NM_023734.3 | 0,67830823  |
| NM_023737.3 | 1,371792617 |
| NM_023738.4 | 0,890335372 |
| NM_023739.3 | 0,94464173  |
| NM_023750.2 | 0,908703389 |
| NM_023781.5 | 0,657000455 |
| NM_023784.5 | 0,418376634 |
| NM_023785.3 | 0,374125259 |
| NM_023788.3 | 0,736663917 |
| NM_023792.2 | 1,154205123 |
| NM_023814.4 | 0,799433778 |
| NM_023815.4 | 0,720537536 |
| NM_023821.3 | 0,624439281 |
| NM_023824.3 | 1,081977275 |
| NM_023831.3 | 0,658836934 |
| NM_023844.5 | 1,070224984 |
| NM_023871.4 | 1,080232932 |
| NM_023876.4 | 1,001446401 |
| NM_023887.4 | 0,818087233 |
| NM_023892.2 | 0,190031878 |
| NM_023906.3 | 0,272091098 |
| NM_023908.2 | 0,654719203 |
| NM_023910.6 | 0,849954472 |
| NM_023913.2 | 0,850197247 |
| NM_024166.6 | 1,069186674 |
| NM_024169.3 | 0,36278813  |
| NM_024170.2 | 0,906970325 |
| NM_024171.2 | 0,818500695 |
| NM_024173.2 | 0,962130781 |
| NM_024175.3 | 0,880353877 |
| NM_024177.3 | 0,984712666 |
| NM_024179.5 | 1,044514347 |
| NM_024182.4 | 0,89446039  |



|             |             |
|-------------|-------------|
| NM_024184.2 | 0,671292906 |
| NM_024188.6 | 1,132509486 |
| NM_024190.2 | 0,922754173 |
| NM_024191.2 | 0,680227744 |
| NM_024197.1 | 1,072278922 |
| NM_024198.3 | 0,670075091 |
| NM_024200.4 | 0,855143449 |
| NM_024206.4 | 0,957267227 |
| NM_024207.4 | 0,978872542 |
| NM_024208.4 | 1,092568014 |
| NM_024209.2 | 1,621209456 |
| NM_024210.2 | 0,957171635 |
| NM_024211.3 | 0,827333906 |
| NM_024212.4 | 0,863090946 |
| NM_024213.2 | 0,851304422 |
| NM_024214.2 | 0,947496122 |
| NM_024215.2 | 0,798133886 |
| NM_024216.1 | 0,968459839 |
| NM_024218.4 | 0,919607084 |
| NM_024219.1 | 0,957895737 |
| NM_024220.2 | 1,128796465 |
| NM_024221.3 | 1,024136149 |
| NM_024222.2 | 0,952711809 |
| NM_024226.4 | 0,550437163 |
| NM_024227.3 | 1,007710102 |
| NM_024228.2 | 0,909378211 |
| NM_024236.2 | 1,016444242 |
| NM_024237.4 | 0,701330519 |
| NM_024240.6 | 0,947218616 |
| NM_024241.2 | 0,798133886 |
| NM_024243.4 | 0,932390526 |
| NM_024246.5 | 1,64615114  |
| NM_024253.4 | 1,463245458 |
| NM_024254.3 | 0,689375299 |
| NM_024256.2 | 1,103780048 |
| NM_024257.1 | 1,121897967 |
| NM_024262.1 | 0,978678081 |
| NM_024264.5 | 1,349785249 |
| NM_024266.3 | 0,925797653 |
| NM_024269.4 | 0,498833679 |
| NM_024270.3 | 0,818980667 |
| NM_024273.2 | 1,086948724 |
| NM_024282.3 | 1,757794868 |
| NM_024284.2 | 0,798133886 |
| NM_024288.2 | 0,991103757 |
| NM_024289.2 | 14,96501037 |
| NM_024406.2 | 1,016259279 |
| NM_024413.2 | 1,054991891 |
| NM_024433.2 | 0,899365984 |
| NM_024434.6 | 0,966288485 |
| NM_024438.4 | 0,875878533 |
| NM_024439.3 | 0,903653697 |
| NM_024450.2 | 0,461185854 |
| NM_024454.1 | 1,059382954 |
| NM_024457.2 | 0,74384319  |
| NM_024459.2 | 0,955862004 |

|             |             |
|-------------|-------------|
| NM_024461.2 | 0,953004693 |
| NM_024467.3 | 0,869677137 |
| NM_024472.4 | 0,995853417 |
| NM_024473.3 | 0,846905168 |
| NM_024478.2 | 1,08281593  |
| NM_024495.5 | 1,082729246 |
| NM_025272.2 | 0,94192632  |
| NM_025273.4 | 0,308801801 |
| NM_025277.3 | 0,861099059 |
| NM_025285.2 | 0,903360493 |
| NM_025289.3 | 0,815547716 |
| NM_025290.3 | 1,197200829 |
| NM_025294.5 | 0,934036145 |
| NM_025295.4 | 1,047550726 |
| NM_025296.4 | 1,021877688 |
| NM_025299.3 | 1,097434093 |
| NM_025301.2 | 1,043132119 |
| NM_025304.3 | 0,823831379 |
| NM_025305.2 | 0,999510718 |
| NM_025310.2 | 0,903019341 |
| NM_025312.3 | 0,798133886 |
| NM_025314.3 | 1,019482242 |
| NM_025315.3 | 0,894763303 |
| NM_025316.2 | 1,033298335 |
| NM_025317.2 | 1,011113009 |
| NM_025323.2 | 0,909581564 |
| NM_025329.3 | 1,441075072 |
| NM_025331.2 | 0,858475456 |
| NM_025333.4 | 1,031932867 |
| NM_025334.3 | 0,929634206 |
| NM_025335.3 | 0,856659661 |
| NM_025337.3 | 0,952318841 |
| NM_025344.2 | 0,932768078 |
| NM_025346.1 | 0,968762976 |
| NM_025348.2 | 1,03853021  |
| NM_025356.4 | 0,656360104 |
| NM_025358.3 | 1,0483194   |
| NM_025359.3 | 0,98755366  |
| NM_025360.2 | 0,770631785 |
| NM_025362.3 | 1,047550726 |
| NM_025363.3 | 1,039264562 |
| NM_025366.3 | 1,24266974  |
| NM_025370.2 | 1,026602725 |
| NM_025374.3 | 1,066673658 |
| NM_025377.3 | 0,595329374 |
| NM_025378.2 | 0,774992332 |
| NM_025379.2 | 1,071961216 |
| NM_025380.2 | 0,927687093 |
| NM_025381.2 | 0,964345889 |
| NM_025384.3 | 1,057351408 |
| NM_025385.3 | 1,036039179 |
| NM_025386.3 | 1,795801244 |
| NM_025388.2 | 0,955662867 |
| NM_025392.2 | 1,03527244  |
| NM_025394.3 | 1,032129097 |
| NM_025395.3 | 1,112692535 |

|             |             |
|-------------|-------------|
| NM_025397.2 | 0,851854436 |
| NM_025402.2 | 0,89966467  |
| NM_025403.4 | 1,041728377 |
| NM_025404.3 | 0,962036381 |
| NM_025407.2 | 1,043838355 |
| NM_025409.3 | 0,959325632 |
| NM_025410.2 | 0,910714698 |
| NM_025411.4 | 1,066009917 |
| NM_025415.3 | 0,540720476 |
| NM_025419.4 | 0,993367067 |
| NM_025421.2 | 0,778399807 |
| NM_025423.2 | 0,937405571 |
| NM_025424.2 | 0,944663608 |
| NM_025427.2 | 1,071883768 |
| NM_025429.2 | 0,249416839 |
| NM_025430.3 | 1,065887842 |
| NM_025433.3 | 0,878191217 |
| NM_025434.3 | 1,068320235 |
| NM_025436.2 | 0,876823143 |
| NM_025437.4 | 1,025194969 |
| NM_025440.2 | 1,031744984 |
| NM_025441.3 | 1,006671576 |
| NM_025442.3 | 0,987473209 |
| NM_025443.2 | 0,947886001 |
| NM_025444.2 | 0,972502863 |
| NM_025449.3 | 1,004449084 |
| NM_025451.2 | 1,067023912 |
| NM_025455.2 | 1,005069671 |
| NM_025456.3 | 0,910913674 |
| NM_025460.2 | 1,060818195 |
| NM_025462.2 | 0,798133886 |
| NM_025473.4 | 1,441075072 |
| NM_025474.3 | 0,7759635   |
| NM_025476.6 | 0,940805488 |
| NM_025478.3 | 1,012980998 |
| NM_025479.5 | 1,014934677 |
| NM_025480.3 | 0,954290516 |
| NM_025485.3 | 0,884296067 |
| NM_025494.3 | 0,84726637  |
| NM_025498.2 | 0,975242267 |
| NM_025499.2 | 1,41336209  |
| NM_025500.2 | 1,038036534 |
| NM_025504.4 | 1,193929789 |
| NM_025507.2 | 0,967862196 |
| NM_025508.5 | 1,042607329 |
| NM_025509.3 | 0,621790128 |
| NM_025510.3 | 0,926405404 |
| NM_025513.3 | 0,99039573  |
| NM_025519.2 | 0,5372055   |
| NM_025520.3 | 0,984821855 |
| NM_025521.3 | 0,97142734  |
| NM_025522.5 | 1,097607802 |
| NM_025523.1 | 1,055698432 |
| NM_025525.2 | 0,911552912 |
| NM_025526.4 | 1,005054849 |
| NM_025527.3 | 0,685896308 |

|             |             |
|-------------|-------------|
| NM_025529.3 | 1,194311366 |
| NM_025535.2 | 0,971899419 |
| NM_025536.2 | 0,948551426 |
| NM_025537.3 | 0,999811561 |
| NM_025538.3 | 1,330223144 |
| NM_025541.3 | 0,780783149 |
| NM_025542.2 | 0,962603151 |
| NM_025543.2 | 0,974548506 |
| NM_025544.2 | 0,977696389 |
| NM_025546.2 | 0,960913341 |
| NM_025548.3 | 0,812914143 |
| NM_025550.2 | 0,961939058 |
| NM_025551.3 | 1,07865406  |
| NM_025554.2 | 0,950696201 |
| NM_025557.1 | 1,066472003 |
| NM_025558.5 | 0,973597541 |
| NM_025559.2 | 0,930676375 |
| NM_025562.3 | 0,755808604 |
| NM_025563.3 | 1,009984239 |
| NM_025566.3 | 0,598600415 |
| NM_025567.2 | 1,086432395 |
| NM_025569.1 | 0,909568972 |
| NM_025574.3 | 1,039788222 |
| NM_025576.2 | 1,00610231  |
| NM_025577.2 | 0,399066943 |
| NM_025578.4 | 1,106295895 |
| NM_025580.2 | 0,960988411 |
| NM_025582.3 | 0,889149154 |
| NM_025584.2 | 0,684375474 |
| NM_025586.3 | 0,804401953 |
| NM_025589.4 | 0,873109129 |
| NM_025592.3 | 0,862432408 |
| NM_025593.1 | 0,993926773 |
| NM_025594.3 | 0,984220312 |
| NM_025595.3 | 1,111146109 |
| NM_025596.5 | 0,830461834 |
| NM_025597.3 | 1,068901044 |
| NM_025599.3 | 0,332555786 |
| NM_025602.3 | 0,952842765 |
| NM_025605.3 | 0,965101541 |
| NM_025606.3 | 1,025148015 |
| NM_025609.2 | 1,365229016 |
| NM_025610.3 | 1,152666006 |
| NM_025611.5 | 0,758257984 |
| NM_025613.3 | 0,816031176 |
| NM_025614.3 | 0,945044338 |
| NM_025615.2 | 0,867655836 |
| NM_025617.2 | 0,861477845 |
| NM_025619.1 | 0,763839071 |
| NM_025620.2 | 1,312720207 |
| NM_025622.3 | 0,816273293 |
| NM_025623.2 | 0,554259643 |
| NM_025624.2 | 0,94141805  |
| NM_025628.2 | 1,063061054 |
| NM_025630.3 | 0,932412445 |
| NM_025635.4 | 0,708021996 |

|             |             |
|-------------|-------------|
| NM_025638.2 | 0,644510771 |
| NM_025641.3 | 1,043835931 |
| NM_025642.1 | 0,646709275 |
| NM_025645.2 | 1,029507805 |
| NM_025647.3 | 0,92669786  |
| NM_025649.3 | 0,916225124 |
| NM_025650.2 | 1,075380246 |
| NM_025652.3 | 0,922842306 |
| NM_025653.2 | 1,118596734 |
| NM_025656.5 | 0,862181667 |
| NM_025658.4 | 0,668003361 |
| NM_025661.4 | 1,077399931 |
| NM_025664.5 | 1,061011317 |
| NM_025665.2 | 0,865817046 |
| NM_025666.2 | 0,977075668 |
| NM_025668.3 | 0,855143449 |
| NM_025670.4 | 0,800454043 |
| NM_025677.3 | 0,857411734 |
| NM_025679.3 | 0,999204596 |
| NM_025680.4 | 0,997667358 |
| NM_025682.3 | 1,019355778 |
| NM_025689.4 | 1,046848143 |
| NM_025691.1 | 0,955592173 |
| NM_025698.1 | 0,943153605 |
| NM_025701.4 | 0,989686019 |
| NM_025706.3 | 0,824159991 |
| NM_025708.4 | 1,138649425 |
| NM_025710.2 | 1,093966517 |
| NM_025716.2 | 1,10743516  |
| NM_025719.3 | 1,431435774 |
| NM_025725.2 | 0,625403418 |
| NM_025731.2 | 0,827333906 |
| NM_025736.2 | 1,006519957 |
| NM_025740.3 | 0,997667358 |
| NM_025745.3 | 0,826425946 |
| NM_025748.4 | 0,777029384 |
| NM_025752.2 | 0,942241393 |
| NM_025757.4 | 1,007009873 |
| NM_025760.4 | 0,6207708   |
| NM_025772.4 | 0,926896467 |
| NM_025774.3 | 0,977306799 |
| NM_025776.2 | 0,957090829 |
| NM_025780.3 | 0,890065538 |
| NM_025789.5 | 0,943193226 |
| NM_025790.2 | 1,112964351 |
| NM_025791.1 | 1,185706733 |
| NM_025794.2 | 1,019401276 |
| NM_025796.3 | 0,925372622 |
| NM_025797.3 | 0,889077713 |
| NM_025798.3 | 1,083181703 |
| NM_025799.4 | 0,610512861 |
| NM_025800.3 | 0,92241057  |
| NM_025806.2 | 1,050843651 |
| NM_025809.5 | 0,804592614 |
| NM_025812.2 | 0,994839102 |
| NM_025813.3 | 0,79657198  |

|             |             |
|-------------|-------------|
| NM_025817.4 | 0,775788655 |
| NM_025818.3 | 1,03194526  |
| NM_025819.4 | 0,970703375 |
| NM_025820.3 | 0,919330661 |
| NM_025823.4 | 0,767436429 |
| NM_025825.3 | 0,977149777 |
| NM_025826.4 | 1,138235311 |
| NM_025827.3 | 0,973868401 |
| NM_025828.3 | 0,966371124 |
| NM_025829.4 | 1,061467418 |
| NM_025833.3 | 1,148258657 |
| NM_025834.3 | 1,145469929 |
| NM_025836.3 | 0,966589642 |
| NM_025840.3 | 0,924896327 |
| NM_025841.4 | 0,812700061 |
| NM_025843.3 | 1,111484348 |
| NM_025844.2 | 0,854379656 |
| NM_025846.2 | 0,952022446 |
| NM_025848.3 | 1,122753554 |
| NM_025849.3 | 1,036353937 |
| NM_025852.3 | 0,456076506 |
| NM_025853.3 | 0,62031131  |
| NM_025854.3 | 0,879330901 |
| NM_025855.4 | 0,548717047 |
| NM_025859.3 | 0,92586554  |
| NM_025862.2 | 0,754333856 |
| NM_025864.3 | 0,804748255 |
| NM_025865.2 | 0,838618938 |
| NM_025866.3 | 0,748250518 |
| NM_025870.1 | 0,977496789 |
| NM_025872.4 | 0,887427871 |
| NM_025878.1 | 0,651172108 |
| NM_025882.3 | 0,936991676 |
| NM_025884.4 | 0,854673848 |
| NM_025885.3 | 0,698964556 |
| NM_025887.4 | 0,973841648 |
| NM_025892.2 | 0,915834259 |
| NM_025894.2 | 0,992176386 |
| NM_025895.4 | 0,969372764 |
| NM_025898.3 | 1,03956415  |
| NM_025899.2 | 1,035984135 |
| NM_025901.3 | 1,014476421 |
| NM_025903.2 | 1,044316118 |
| NM_025904.3 | 0,975939575 |
| NM_025912.4 | 0,92389618  |
| NM_025915.4 | 0,953711386 |
| NM_025918.3 | 1,579639983 |
| NM_025920.3 | 1,034476968 |
| NM_025921.3 | 0,879930216 |
| NM_025924.2 | 0,797105363 |
| NM_025926.4 | 1,247084197 |
| NM_025927.4 | 0,962036381 |
| NM_025929.2 | 0,356309771 |
| NM_025931.2 | 0,890479956 |
| NM_025932.2 | 0,893477925 |
| NM_025933.3 | 1,000201262 |

|             |             |
|-------------|-------------|
| NM_025934.2 | 0,879008227 |
| NM_025936.3 | 0,803539965 |
| NM_025937.4 | 0,886469017 |
| NM_025942.2 | 0,937202669 |
| NM_025944.3 | 0,447230195 |
| NM_025954.3 | 1,101535017 |
| NM_025958.2 | 0,963265035 |
| NM_025959.3 | 0,976886865 |
| NM_025960.3 | 0,991699258 |
| NM_025961.5 | 0,81304564  |
| NM_025962.3 | 0,972414108 |
| NM_025965.3 | 0,879012745 |
| NM_025966.3 | 1,031021035 |
| NM_025969.4 | 1,119252862 |
| NM_025974.2 | 0,852617339 |
| NM_025975.5 | 0,871280361 |
| NM_025976.5 | 0,9534358   |
| NM_025980.2 | 0,960401234 |
| NM_025982.4 | 0,965959792 |
| NM_025983.3 | 1,064335646 |
| NM_025985.4 | 0,974493079 |
| NM_025987.3 | 1,070158225 |
| NM_025988.2 | 0,943739392 |
| NM_025992.2 | 0,633439592 |
| NM_025993.2 | 1,184729987 |
| NM_025994.3 | 0,611593292 |
| NM_025995.2 | 0,755808604 |
| NM_025997.2 | 0,921941685 |
| NM_025998.3 | 0,68411476  |
| NM_026000.2 | 0,97363876  |
| NM_026001.2 | 0,7851465   |
| NM_026006.1 | 1,019514088 |
| NM_026007.4 | 0,879053449 |
| NM_026009.2 | 0,991136493 |
| NM_026010.2 | 1,14278261  |
| NM_026011.3 | 0,972189668 |
| NM_026012.2 | 0,600569495 |
| NM_026014.3 | 0,550712381 |
| NM_026017.2 | 0,980063009 |
| NM_026021.4 | 0,920923715 |
| NM_026027.3 | 1,037821152 |
| NM_026029.3 | 1,011547947 |
| NM_026030.2 | 0,905985311 |
| NM_026032.1 | 0,973033596 |
| NM_026033.2 | 0,978143856 |
| NM_026034.4 | 0,910529323 |
| NM_026038.2 | 0,955862497 |
| NM_026039.3 | 1,032411992 |
| NM_026041.2 | 1,004656271 |
| NM_026042.3 | 1,061662468 |
| NM_026046.3 | 0,824159991 |
| NM_026047.4 | 1,242856793 |
| NM_026050.2 | 1,783708306 |
| NM_026055.2 | 0,778914544 |
| NM_026056.4 | 1,829056822 |
| NM_026061.2 | 1,065305823 |

|             |             |
|-------------|-------------|
| NM_026062.4 | 1,208139861 |
| NM_026063.2 | 0,469490521 |
| NM_026064.2 | 0,538969722 |
| NM_026067.3 | 0,833052244 |
| NM_026068.2 | 1,093870996 |
| NM_026069.3 | 0,854423859 |
| NM_026079.3 | 0,970265757 |
| NM_026081.5 | 0,577596891 |
| NM_026095.4 | 1,056669191 |
| NM_026106.4 | 0,880730086 |
| NM_026111.3 | 0,955998673 |
| NM_026114.3 | 0,92628458  |
| NM_026115.4 | 0,760840454 |
| NM_026119.3 | 0,942601302 |
| NM_026121.3 | 1,041191382 |
| NM_026124.3 | 1,09417102  |
| NM_026125.3 | 1,145972171 |
| NM_026126.4 | 0,864880325 |
| NM_026129.2 | 0,780577961 |
| NM_026130.1 | 0,976057234 |
| NM_026140.3 | 0,932672742 |
| NM_026144.4 | 0,871424739 |
| NM_026147.6 | 0,862811178 |
| NM_026152.1 | 0,860373685 |
| NM_026154.1 | 1,177247482 |
| NM_026155.3 | 0,89978982  |
| NM_026159.4 | 1,028052383 |
| NM_026160.4 | 0,998125063 |
| NM_026163.2 | 0,942816984 |
| NM_026165.3 | 0,900091109 |
| NM_026172.3 | 0,998862794 |
| NM_026175.5 | 0,908917807 |
| NM_026177.3 | 0,890546951 |
| NM_026178.2 | 0,76357569  |
| NM_026181.1 | 0,950106719 |
| NM_026184.2 | 0,829310991 |
| NM_026185.4 | 1,160895399 |
| NM_026186.4 | 0,972223492 |
| NM_026189.3 | 0,930691088 |
| NM_026191.2 | 1,025195762 |
| NM_026192.3 | 0,976254783 |
| NM_026195.3 | 0,893596959 |
| NM_026198.2 | 0,952659808 |
| NM_026201.3 | 0,824738349 |
| NM_026209.1 | 0,584839486 |
| NM_026211.3 | 0,909901885 |
| NM_026212.2 | 1,376092907 |
| NM_026217.3 | 0,876477357 |
| NM_026218.2 | 0,712619541 |
| NM_026219.1 | 1,149034519 |
| NM_026220.4 | 0,889843451 |
| NM_026225.3 | 0,989547239 |
| NM_026231.2 | 0,849864786 |
| NM_026232.3 | 0,874732043 |
| NM_026234.4 | 0,980164422 |
| NM_026235.4 | 0,862847444 |



|             |             |
|-------------|-------------|
| NM_026239.2 | 1,321235149 |
| NM_026242.3 | 0,986485532 |
| NM_026246.3 | 0,99721735  |
| NM_026247.3 | 0,980613215 |
| NM_026267.2 | 0,905566796 |
| NM_026268.3 | 0,93276687  |
| NM_026271.1 | 1,351226667 |
| NM_026272.3 | 0,936838561 |
| NM_026274.4 | 0,665111572 |
| NM_026275.4 | 1,021983265 |
| NM_026277.3 | 0,945158549 |
| NM_026280.3 | 0,789039867 |
| NM_026281.2 | 0,929644583 |
| NM_026298.5 | 0,955556459 |
| NM_026305.2 | 0,927135815 |
| NM_026309.2 | 0,929885287 |
| NM_026312.5 | 0,5184728   |
| NM_026318.3 | 0,924014063 |
| NM_026321.4 | 0,969895033 |
| NM_026329.2 | 0,997667358 |
| NM_026344.3 | 0,894389163 |
| NM_026345.4 | 0,736497892 |
| NM_026346.3 | 0,917365173 |
| NM_026348.3 | 0,554259643 |
| NM_026353.4 | 0,856605869 |
| NM_026360.3 | 0,999348347 |
| NM_026366.2 | 1,184729987 |
| NM_026368.2 | 0,911164408 |
| NM_026369.2 | 0,823188295 |
| NM_026370.1 | 1,227898286 |
| NM_026371.3 | 0,613949143 |
| NM_026374.3 | 0,979888501 |
| NM_026376.3 | 0,86931655  |
| NM_026384.3 | 1,313958251 |
| NM_026385.4 | 0,833345675 |
| NM_026389.3 | 1,033088392 |
| NM_026396.3 | 0,994361086 |
| NM_026398.4 | 0,72557626  |
| NM_026399.2 | 0,970253534 |
| NM_026402.3 | 5,986004146 |
| NM_026403.3 | 0,983532755 |
| NM_026405.3 | 0,658680935 |
| NM_026406.3 | 0,997667358 |
| NM_026410.3 | 0,438000303 |
| NM_026412.3 | 0,195970374 |
| NM_026414.2 | 2,194868187 |
| NM_026417.4 | 1,000810442 |
| NM_026423.4 | 0,947391207 |
| NM_026432.3 | 1,040282195 |
| NM_026435.5 | 0,900458743 |
| NM_026436.3 | 0,886369793 |
| NM_026438.4 | 0,995211841 |
| NM_026439.2 | 0,528176836 |
| NM_026441.4 | 0,983268035 |
| NM_026443.4 | 1,094668528 |
| NM_026444.3 | 1,073290313 |

|             |             |
|-------------|-------------|
| NM_026445.2 | 1,662778929 |
| NM_026447.4 | 1,061471665 |
| NM_026452.2 | 1,067647552 |
| NM_026453.3 | 0,82808593  |
| NM_026455.4 | 0,985053863 |
| NM_026464.2 | 0,792265255 |
| NM_026468.2 | 1,041193396 |
| NM_026472.4 | 0,915473172 |
| NM_026473.2 | 0,66741459  |
| NM_026474.5 | 1,06455688  |
| NM_026479.4 | 0,854091612 |
| NM_026483.2 | 1,009349645 |
| NM_026484.3 | 0,923083872 |
| NM_026485.2 | 1,023648278 |
| NM_026486.3 | 0,991167896 |
| NM_026490.2 | 1,058976525 |
| NM_026494.3 | 0,942496813 |
| NM_026499.4 | 0,925235793 |
| NM_026502.2 | 0,963039129 |
| NM_026503.3 | 1,014702509 |
| NM_026505.2 | 0,701656164 |
| NM_026506.2 | 0,966926907 |
| NM_026509.3 | 1,084421041 |
| NM_026510.1 | 1,106627615 |
| NM_026511.2 | 0,959854892 |
| NM_026513.2 | 0,887700828 |
| NM_026515.2 | 0,300607195 |
| NM_026516.2 | 0,578647067 |
| NM_026519.3 | 1,008866162 |
| NM_026520.3 | 0,92811569  |
| NM_026521.4 | 0,985284961 |
| NM_026528.3 | 0,947607723 |
| NM_026529.4 | 0,979433228 |
| NM_026532.3 | 0,997667358 |
| NM_026533.3 | 0,885148483 |
| NM_026534.2 | 0,897529742 |
| NM_026538.3 | 1,109650428 |
| NM_026545.3 | 0,920617937 |
| NM_026547.1 | 0,98502087  |
| NM_026550.3 | 0,928191105 |
| NM_026553.4 | 1,031332195 |
| NM_026554.4 | 0,930848019 |
| NM_026556.4 | 1,059778944 |
| NM_026559.3 | 0,856679635 |
| NM_026560.4 | 0,262207447 |
| NM_026562.2 | 0,864645043 |
| NM_026566.2 | 1,145469929 |
| NM_026570.4 | 0,963915427 |
| NM_026572.3 | 1,105952028 |
| NM_026574.3 | 0,959722139 |
| NM_026576.3 | 1,074411001 |
| NM_026579.3 | 0,924392354 |
| NM_026585.3 | 0,588367929 |
| NM_026592.3 | 3,658113645 |
| NM_026597.3 | 1,08836439  |
| NM_026598.3 | 0,936335348 |

|             |             |
|-------------|-------------|
| NM_026602.3 | 0,458387705 |
| NM_026603.4 | 0,983102871 |
| NM_026609.2 | 0,961349702 |
| NM_026610.1 | 1,03670468  |
| NM_026611.2 | 0,903565034 |
| NM_026614.2 | 2,394401658 |
| NM_026615.4 | 0,984000682 |
| NM_026616.2 | 0,906618104 |
| NM_026617.3 | 1,110066057 |
| NM_026618.2 | 0,955359965 |
| NM_026620.3 | 1,496501037 |
| NM_026623.3 | 0,828129114 |
| NM_026626.2 | 1,047550726 |
| NM_026631.3 | 0,946765962 |
| NM_026632.4 | 0,926535681 |
| NM_026634.2 | 1,349785249 |
| NM_026637.3 | 0,690692786 |
| NM_026642.2 | 0,878639799 |
| NM_026664.3 | 0,723797887 |
| NM_026667.3 | 0,585658588 |
| NM_026670.4 | 0,798133886 |
| NM_026684.2 | 1,068884602 |
| NM_026686.2 | 1,136232268 |
| NM_026688.2 | 1,112734507 |
| NM_026690.1 | 1,269758455 |
| NM_026693.5 | 0,991353007 |
| NM_026697.3 | 0,988327493 |
| NM_026703.2 | 1,108103969 |
| NM_026720.2 | 0,480803546 |
| NM_026725.2 | 0,955807189 |
| NM_026730.1 | 0,901891291 |
| NM_026731.3 | 1,002307671 |
| NM_026734.1 | 1,00037841  |
| NM_026735.2 | 0,925412897 |
| NM_026737.3 | 0,992595701 |
| NM_026738.2 | 1,155193783 |
| NM_026740.2 | 0,993844877 |
| NM_026742.4 | 1,061896882 |
| NM_026743.3 | 1,030922936 |
| NM_026744.3 | 1,038560293 |
| NM_026751.1 | 0,374125259 |
| NM_026753.2 | 0,87067071  |
| NM_026759.3 | 0,959447204 |
| NM_026760.2 | 0,913002926 |
| NM_026768.3 | 1,099302384 |
| NM_026772.2 | 0,811726783 |
| NM_026774.2 | 1,014393536 |
| NM_026775.4 | 0,861669544 |
| NM_026780.3 | 0,953904019 |
| NM_026784.3 | 0,709452343 |
| NM_026785.2 | 0,438535102 |
| NM_026787.2 | 0,909684095 |
| NM_026792.3 | 0,988507982 |
| NM_026793.2 | 0,808620101 |
| NM_026794.2 | 0,950504901 |
| NM_026808.1 | 0,418773953 |

|             |             |
|-------------|-------------|
| NM_026814.3 | 0,374125259 |
| NM_026815.2 | 1,81394065  |
| NM_026816.3 | 1,017863053 |
| NM_026821.5 | 0,780433336 |
| NM_026823.2 | 0,835472181 |
| NM_026826.1 | 0,978935078 |
| NM_026829.2 | 0,844441996 |
| NM_026835.2 | 0,463915321 |
| NM_026840.3 | 0,834782891 |
| NM_026841.1 | 0,584160492 |
| NM_026842.4 | 0,950159388 |
| NM_026845.4 | 0,956616207 |
| NM_026850.4 | 0,899552555 |
| NM_026851.2 | 0,902966041 |
| NM_026860.1 | 2,494168394 |
| NM_026864.1 | 1,154164198 |
| NM_026873.2 | 0,945480573 |
| NM_026875.2 | 1,202317072 |
| NM_026878.1 | 1,592022379 |
| NM_026879.2 | 0,960459272 |
| NM_026880.2 | 1,102466571 |
| NM_026883.3 | 1,020239017 |
| NM_026887.3 | 0,631177308 |
| NM_026890.2 | 0,880857936 |
| NM_026891.2 | 0,944609198 |
| NM_026892.3 | 0,907232708 |
| NM_026893.3 | 0,812471621 |
| NM_026900.1 | 1,162330902 |
| NM_026908.3 | 1,075263708 |
| NM_026911.3 | 0,954242104 |
| NM_026914.1 | 1,070778542 |
| NM_026917.5 | 0,920923715 |
| NM_026921.4 | 1,035422866 |
| NM_026929.4 | 0,659874473 |
| NM_026931.2 | 1,147691084 |
| NM_026932.4 | 0,827944913 |
| NM_026933.2 | 0,898169535 |
| NM_026934.3 | 0,879596312 |
| NM_026936.3 | 1,05050395  |
| NM_026938.1 | 0,913893763 |
| NM_026943.1 | 0,880823433 |
| NM_026952.2 | 1,219371215 |
| NM_026954.1 | 0,953408547 |
| NM_026958.3 | 1,021707535 |
| NM_026963.5 | 1,396734301 |
| NM_026965.2 | 0,989066777 |
| NM_026976.2 | 0,526546661 |
| NM_026977.2 | 0,36278813  |
| NM_026979.5 | 0,669023993 |
| NM_026982.1 | 1,128592169 |
| NM_026985.1 | 0,199533472 |
| NM_026988.2 | 1,100808905 |
| NM_026993.3 | 0,872958938 |
| NM_027008.2 | 0,909447097 |
| NM_027009.2 | 0,804666232 |
| NM_027013.2 | 0,769035255 |

|             |             |
|-------------|-------------|
| NM_027014.1 | 1,182420572 |
| NM_027016.2 | 0,923766072 |
| NM_027026.2 | 1,083181703 |
| NM_027030.2 | 0,913142762 |
| NM_027040.1 | 0,787632124 |
| NM_027044.3 | 1,018490148 |
| NM_027052.3 | 2,217038573 |
| NM_027062.2 | 1,180167484 |
| NM_027081.3 | 1,072932792 |
| NM_027085.3 | 1,024060674 |
| NM_027088.2 | 0,755515086 |
| NM_027090.1 | 1,084523104 |
| NM_027093.4 | 1,710286899 |
| NM_027106.4 | 1,003750695 |
| NM_027107.1 | 0,648968087 |
| NM_027113.2 | 1,113227283 |
| NM_027117.3 | 0,99943106  |
| NM_027122.3 | 1,029668009 |
| NM_027127.2 | 1,381385572 |
| NM_027130.1 | 0,950533467 |
| NM_027134.3 | 1,063896688 |
| NM_027136.3 | 0,943880074 |
| NM_027144.2 | 0,921895153 |
| NM_027147.1 | 0,936585683 |
| NM_027152.1 | 1,16676352  |
| NM_027154.5 | 0,963346011 |
| NM_027156.3 | 0,948636697 |
| NM_027159.2 | 0,917519021 |
| NM_027166.5 | 1,179061423 |
| NM_027168.2 | 0,921412528 |
| NM_027181.1 | 0,830439305 |
| NM_027185.3 | 0,710837992 |
| NM_027187.3 | 0,731622729 |
| NM_027189.2 | 0,990822299 |
| NM_027192.2 | 0,909499212 |
| NM_027193.2 | 0,860307359 |
| NM_027194.3 | 1,046386871 |
| NM_027196.4 | 1,036039179 |
| NM_027198.1 | 1,171657583 |
| NM_027203.3 | 1,041874169 |
| NM_027204.2 | 1,080552739 |
| NM_027207.2 | 0,925720192 |
| NM_027209.3 | 0,470328897 |
| NM_027212.2 | 0,855813362 |
| NM_027215.2 | 1,059968948 |
| NM_027219.3 | 0,809755969 |
| NM_027223.1 | 0,665111572 |
| NM_027231.2 | 1,005199507 |
| NM_027236.2 | 0,995059759 |
| NM_027237.1 | 0,853674131 |
| NM_027241.4 | 1,295217271 |
| NM_027244.1 | 1,039260145 |
| NM_027250.4 | 0,965737183 |
| NM_027259.1 | 1,074175591 |
| NM_027263.2 | 0,431423722 |
| NM_027268.2 | 1,496501037 |

|             |             |
|-------------|-------------|
| NM_027283.1 | 0           |
| NM_027294.2 | 0,645549467 |
| NM_027297.3 | 0,857499217 |
| NM_027298.1 | 1,579639983 |
| NM_027314.3 | 1,090697433 |
| NM_027315.4 | 0,9571738   |
| NM_027320.4 | 0,960038721 |
| NM_027321.3 | 1,19115436  |
| NM_027327.1 | 0,954079949 |
| NM_027332.3 | 0,577596891 |
| NM_027335.1 | 0,94874124  |
| NM_027338.1 | 0,927387574 |
| NM_027342.1 | 0,994106572 |
| NM_027346.1 | 1,058260149 |
| NM_027348.1 | 0,730000506 |
| NM_027355.2 | 1,037309769 |
| NM_027356.2 | 0,929979012 |
| NM_027357.2 | 0,948120955 |
| NM_027363.1 | 0,997667358 |
| NM_027374.3 | 2,494168394 |
| NM_027381.2 | 0,955923954 |
| NM_027382.4 | 1,41336209  |
| NM_027395.2 | 0,335205633 |
| NM_027399.3 | 0,901118904 |
| NM_027400.3 | 0,978530986 |
| NM_027412.3 | 0,78442548  |
| NM_027413.1 | 0,758227192 |
| NM_027420.4 | 0,880141098 |
| NM_027423.1 | 1,036286739 |
| NM_027425.3 | 1,062604286 |
| NM_027430.2 | 1,100529208 |
| NM_027432.3 | 1,001739469 |
| NM_027438.3 | 1,02463134  |
| NM_027439.4 | 0,86652389  |
| NM_027442.5 | 0,946830804 |
| NM_027446.2 | 0,949077947 |
| NM_027450.3 | 0,423719727 |
| NM_027453.2 | 0,935313148 |
| NM_027457.4 | 1,064971663 |
| NM_027460.2 | 1,218378934 |
| NM_027468.1 | 0,748250518 |
| NM_027472.3 | 1,017066445 |
| NM_027475.3 | 0,937968045 |
| NM_027476.3 | 0,7759635   |
| NM_027482.3 | 1,107245126 |
| NM_027490.1 | 0,907870225 |
| NM_027491.2 | 0,871141031 |
| NM_027492.2 | 1,107334609 |
| NM_027494.3 | 1,022609042 |
| NM_027498.3 | 0,285047816 |
| NM_027511.1 | 0,869927129 |
| NM_027512.2 | 0,418376634 |
| NM_027514.2 | 0,850102411 |
| NM_027519.3 | 0,498833679 |
| NM_027521.3 | 0,302323442 |
| NM_027529.1 | 1,307288262 |

|             |             |
|-------------|-------------|
| NM_027534.2 | 0,893088721 |
| NM_027541.4 | 1,371792617 |
| NM_027544.2 | 1,055813615 |
| NM_027545.2 | 1,005963968 |
| NM_027551.2 | 0,36278813  |
| NM_027558.1 | 0,968723516 |
| NM_027570.3 | 1,193938094 |
| NM_027587.2 | 0,665111572 |
| NM_027592.3 | 0,948399834 |
| NM_027629.3 | 0,864076572 |
| NM_027641.2 | 0,970191239 |
| NM_027643.1 | 1,441075072 |
| NM_027652.2 | 0,94448536  |
| NM_027695.3 | 0,617603602 |
| NM_027715.1 | 1,092762741 |
| NM_027744.1 | 0,931156201 |
| NM_027748.3 | 1,033863906 |
| NM_027769.2 | 1,071874021 |
| NM_027782.3 | 1,08836439  |
| NM_027788.2 | 0,997667358 |
| NM_027799.2 | 0,864162078 |
| NM_027805.2 | 0,831389465 |
| NM_027816.3 | 0,895939605 |
| NM_027817.3 | 0,737366874 |
| NM_027828.2 | 1,282715174 |
| NM_027834.3 | 0,853426294 |
| NM_027853.2 | 0,581972625 |
| NM_027859.2 | 0,656360104 |
| NM_027873.2 | 1,013362535 |
| NM_027874.2 | 0,908985815 |
| NM_027879.2 | 0,997667358 |
| NM_027885.3 | 0,906970325 |
| NM_027886.3 | 0,88090978  |
| NM_027891.4 | 1,011334034 |
| NM_027901.2 | 1,025864644 |
| NM_027903.3 | 0,974735138 |
| NM_027905.2 | 1,055289515 |
| NM_027909.2 | 0,598600415 |
| NM_027911.3 | 0,911212002 |
| NM_027914.1 | 0,895566897 |
| NM_027919.4 | 0,760127511 |
| NM_027927.4 | 0,991764001 |
| NM_027945.3 | 1,255129902 |
| NM_027946.3 | 0,871942688 |
| NM_027948.1 | 0,810604728 |
| NM_027949.1 | 0,410804206 |
| NM_027959.3 | 0,791848922 |
| NM_027972.1 | 1,155193783 |
| NM_027977.2 | 1,177197264 |
| NM_027980.2 | 1,062401499 |
| NM_027994.1 | 0,956475691 |
| NM_027998.4 | 0,272091098 |
| NM_027999.1 | 0,768423939 |
| NM_028003.2 | 0,902651419 |
| NM_028005.3 | 0,967150474 |
| NM_028007.3 | 0,933382515 |

|             |             |
|-------------|-------------|
| NM_028015.2 | 0,892425618 |
| NM_028019.3 | 0,806062368 |
| NM_028028.2 | 0,798133886 |
| NM_028038.3 | 1,041583816 |
| NM_028039.2 | 0,311100574 |
| NM_028040.2 | 1,007016316 |
| NM_028041.2 | 0,997667358 |
| NM_028043.2 | 0,889429861 |
| NM_028044.2 | 0,834148426 |
| NM_028049.2 | 0,94258143  |
| NM_028053.2 | 1,496501037 |
| NM_028070.1 | 1,122375777 |
| NM_028071.3 | 0,354949521 |
| NM_028074.4 | 0,88854749  |
| NM_028094.3 | 0,997667358 |
| NM_028095.1 | 1,097434093 |
| NM_028099.4 | 0,818980667 |
| NM_028101.4 | 0,986520236 |
| NM_028112.2 | 1,582506843 |
| NM_028116.2 | 1,031834048 |
| NM_028117.3 | 0,849455134 |
| NM_028125.3 | 1,046934882 |
| NM_028128.1 | 0,899856832 |
| NM_028132.3 | 1,010341179 |
| NM_028133.2 | 0,911835652 |
| NM_028136.2 | 0,960716715 |
| NM_028139.5 | 0,858559055 |
| NM_028142.4 | 1,074945334 |
| NM_028149.1 | 1,102684974 |
| NM_028150.2 | 1,001819979 |
| NM_028151.2 | 0,929655469 |
| NM_028166.3 | 0,938981043 |
| NM_028173.5 | 0,736044148 |
| NM_028176.1 | 0,460461857 |
| NM_028177.3 | 1,02230112  |
| NM_028179.1 | 0,731622729 |
| NM_028180.3 | 0,760127511 |
| NM_028183.1 | 0,861930302 |
| NM_028185.2 | 0,852174201 |
| NM_028197.2 | 0,910152677 |
| NM_028198.2 | 0,898768159 |
| NM_028202.3 | 0,066511157 |
| NM_028203.1 | 0,760459734 |
| NM_028207.3 | 0,844522677 |
| NM_028211.1 | 1,084712161 |
| NM_028233.2 | 0,998437163 |
| NM_028235.1 | 1,02716138  |
| NM_028238.7 | 0,623542099 |
| NM_028242.2 | 0,383718214 |
| NM_028243.3 | 0,646023168 |
| NM_028247.4 | 1,175030443 |
| NM_028259.4 | 0,272091098 |
| NM_028260.2 | 1,03321227  |
| NM_028263.1 | 1,287897862 |
| NM_028264.4 | 0,851825854 |
| NM_028270.4 | 0,938981043 |



|             |             |
|-------------|-------------|
| NM_028274.4 | 0,947299685 |
| NM_028276.1 | 1,232412618 |
| NM_028284.2 | 1,104560289 |
| NM_028287.2 | 0,997667358 |
| NM_028292.2 | 0,96127949  |
| NM_028306.3 | 0,835830764 |
| NM_028310.3 | 2,17672878  |
| NM_028312.3 | 1,011445055 |
| NM_028333.2 | 0,682078704 |
| NM_028339.1 | 0,969915178 |
| NM_028341.4 | 0,675344058 |
| NM_028343.4 | 1,108519286 |
| NM_028351.3 | 0,408136646 |
| NM_028354.4 | 0,498833679 |
| NM_028372.1 | 1,06598874  |
| NM_028375.3 | 0,878897434 |
| NM_028387.1 | 0,952995685 |
| NM_028399.1 | 0,96885386  |
| NM_028402.2 | 0,640778222 |
| NM_028419.3 | 1,044390071 |
| NM_028420.2 | 0,997667358 |
| NM_028421.1 | 2,565430348 |
| NM_028428.2 | 0,776445465 |
| NM_028431.2 | 0,961470922 |
| NM_028443.2 | 1,360455488 |
| NM_028444.1 | 0,607425272 |
| NM_028451.1 | 0,816273293 |
| NM_028454.2 | 1,199634164 |
| NM_028459.2 | 0,895654824 |
| NM_028472.2 | 0,77172201  |
| NM_028491.1 | 1,360455488 |
| NM_028492.2 | 0,867536833 |
| NM_028516.1 | 0,908324012 |
| NM_028536.1 | 0,5372055   |
| NM_028538.1 | 1,075485412 |
| NM_028542.1 | 0,790604321 |
| NM_028543.3 | 1,046012472 |
| NM_028544.1 | 0,830147261 |
| NM_028546.1 | 0,84741625  |
| NM_028567.1 | 0,964411779 |
| NM_028593.2 | 0,498833679 |
| NM_028595.4 | 0,429846042 |
| NM_028596.2 | 1,08836439  |
| NM_028597.3 | 1,009140293 |
| NM_028603.4 | 1,036465533 |
| NM_028607.1 | 1,07249241  |
| NM_028611.3 | 0,613949143 |
| NM_028614.3 | 2,494168394 |
| NM_028623.5 | 0,688046454 |
| NM_028626.1 | 2,394401658 |
| NM_028632.2 | 0,989513626 |
| NM_028633.3 | 0,957760663 |
| NM_028658.4 | 0,7736628   |
| NM_028672.2 | 1,496501037 |
| NM_028677.4 | 2,743585234 |
| NM_028680.3 | 0,877947275 |

|             |             |
|-------------|-------------|
| NM_028708.2 | 0,461883036 |
| NM_028712.4 | 0,616498766 |
| NM_028721.3 | 0,914784223 |
| NM_028749.1 | 0,473469254 |
| NM_028753.2 | 1,043015874 |
| NM_028758.2 | 1,021673103 |
| NM_028761.3 | 0,977714011 |
| NM_028762.1 | 0,83850193  |
| NM_028763.3 | 0,88477342  |
| NM_028766.2 | 0,846698551 |
| NM_028769.5 | 0,997667358 |
| NM_028770.2 | 0,581972625 |
| NM_028772.3 | 0,942241393 |
| NM_028774.3 | 1,611616501 |
| NM_028775.3 | 0,877947275 |
| NM_028782.2 | 0,95856083  |
| NM_028787.4 | 0,5205221   |
| NM_028790.3 | 0,906970325 |
| NM_028791.6 | 1,256321858 |
| NM_028792.3 | 1,071084235 |
| NM_028803.4 | 0,975638222 |
| NM_028805.2 | 0,528176836 |
| NM_028808.3 | 0,80457045  |
| NM_028810.2 | 0,957145854 |
| NM_028815.4 | 0,987854236 |
| NM_028826.1 | 1,995334715 |
| NM_028839.4 | 0,933531599 |
| NM_028850.5 | 1,007138883 |
| NM_028862.3 | 0,681333805 |
| NM_028864.2 | 0,794061774 |
| NM_028866.3 | 0,90529075  |
| NM_028870.3 | 0,848892401 |
| NM_028873.4 | 1,097434093 |
| NM_028874.2 | 1,662778929 |
| NM_028875.3 | 0,748250518 |
| NM_028876.2 | 1,053093322 |
| NM_028877.1 | 0,356309771 |
| NM_028882.4 | 0,880294727 |
| NM_028883.2 | 0,876329436 |
| NM_028887.3 | 1,08836439  |
| NM_028900.4 | 0,993324954 |
| NM_028903.2 | 0,678968063 |
| NM_028908.3 | 0,801339243 |
| NM_028918.2 | 0,810604728 |
| NM_028922.3 | 1,037822434 |
| NM_028923.3 | 0,951684335 |
| NM_028932.4 | 0,900439094 |
| NM_028971.1 | 2,494168394 |
| NM_028973.2 | 1,349736748 |
| NM_028974.1 | 1,105788943 |
| NM_028976.2 | 0,929644583 |
| NM_028977.1 | 0,434566763 |
| NM_028979.2 | 0,72557626  |
| NM_028990.4 | 1,425239082 |
| NM_028994.2 | 0,877947275 |
| NM_029012.2 | 1,028844463 |

|             |             |
|-------------|-------------|
| NM_029017.2 | 1,024718377 |
| NM_029021.1 | 0,554259643 |
| NM_029023.3 | 0,892360134 |
| NM_029037.4 | 0,844180072 |
| NM_029074.3 | 0,842927114 |
| NM_029083.2 | 0,757825061 |
| NM_029084.3 | 0,561187889 |
| NM_029092.3 | 1,009246881 |
| NM_029100.2 | 0,613412943 |
| NM_029101.4 | 0,932809442 |
| NM_029103.3 | 0,851655102 |
| NM_029107.2 | 0,780783149 |
| NM_029115.3 | 0,891878812 |
| NM_029148.1 | 1,044160594 |
| NM_029157.3 | 0,771147802 |
| NM_029162.2 | 1,330223144 |
| NM_029182.1 | 0,771529423 |
| NM_029195.1 | 0,181394065 |
| NM_029231.4 | 0,842292933 |
| NM_029236.2 | 1,124009512 |
| NM_029238.2 | 1,097434093 |
| NM_029250.2 | 0,965085349 |
| NM_029271.2 | 1,074550155 |
| NM_029272.3 | 0,834115332 |
| NM_029281.2 | 1,036465533 |
| NM_029293.2 | 1,084112126 |
| NM_029307.1 | 0,665111572 |
| NM_029309.2 | 1,068929312 |
| NM_029315.1 | 2,394401658 |
| NM_029321.2 | 0,959660982 |
| NM_029327.3 | 0,786040948 |
| NM_029342.4 | 0,932921983 |
| NM_029344.3 | 0,977537878 |
| NM_029348.2 | 0,895944411 |
| NM_029354.2 | 0,652320965 |
| NM_029362.3 | 0,907180353 |
| NM_029363.1 | 1,795801244 |
| NM_029364.3 | 0,912711856 |
| NM_029366.2 | 1,024158525 |
| NM_029383.1 | 0,688046454 |
| NM_029384.1 | 1,187026318 |
| NM_029391.2 | 0,904526132 |
| NM_029394.3 | 1,023062527 |
| NM_029404.3 | 1,227898286 |
| NM_029407.1 | 0,369506429 |
| NM_029410.3 | 0,86788949  |
| NM_029418.4 | 0,814087822 |
| NM_029482.1 | 0,666262284 |
| NM_029497.1 | 0,831389465 |
| NM_029519.3 | 0,906970325 |
| NM_029537.1 | 0,612916717 |
| NM_029541.3 | 0,989860884 |
| NM_029545.2 | 0,955062346 |
| NM_029555.2 | 1,116923223 |
| NM_029556.3 | 0,818010784 |
| NM_029561.4 | 0,920923715 |

|             |             |
|-------------|-------------|
| NM_029564.2 | 0,972998647 |
| NM_029565.3 | 0,944785184 |
| NM_029571.2 | 0,853613925 |
| NM_029572.2 | 1,10485476  |
| NM_029573.2 | 1,068166588 |
| NM_029576.3 | 1,002126291 |
| NM_029578.3 | 0,997667358 |
| NM_029584.1 | 1,021421342 |
| NM_029602.1 | 1,870626296 |
| NM_029608.1 | 1,710286899 |
| NM_029614.3 | 0,511304521 |
| NM_029620.2 | 0,80148739  |
| NM_029627.2 | 1,140191266 |
| NM_029629.2 | 3,990669431 |
| NM_029632.3 | 0,911196655 |
| NM_029635.3 | 1,069178479 |
| NM_029639.2 | 2,743585234 |
| NM_029645.3 | 0,946121211 |
| NM_029653.3 | 0,94778399  |
| NM_029658.1 | 0,791236906 |
| NM_029686.4 | 0,598600415 |
| NM_029688.5 | 0,90083974  |
| NM_029705.3 | 0,85486206  |
| NM_029711.1 | 0,613949143 |
| NM_029720.2 | 0,626053006 |
| NM_029721.2 | 0,967617136 |
| NM_029726.2 | 0,587429622 |
| NM_029751.4 | 0,894237873 |
| NM_029752.2 | 1,044891003 |
| NM_029760.2 | 0,970208623 |
| NM_029762.1 | 0,644900999 |
| NM_029763.3 | 0,955062346 |
| NM_029774.2 | 0,897182876 |
| NM_029788.5 | 0,91870506  |
| NM_029789.2 | 4,323225217 |
| NM_029796.2 | 0,785475771 |
| NM_029803.3 | 1,114353598 |
| NM_029805.1 | 0,914528411 |
| NM_029809.2 | 0,617603602 |
| NM_029814.1 | 0,91158974  |
| NM_029823.2 | 1,030896976 |
| NM_029825.3 | 1,020868924 |
| NM_029835.1 | 0,302863305 |
| NM_029839.3 | 1,195785698 |
| NM_029840.1 | 1,119755205 |
| NM_029842.5 | 0,931156201 |
| NM_029843.2 | 1,152860058 |
| NM_029844.3 | 0,964326289 |
| NM_029850.3 | 1,150181259 |
| NM_029852.2 | 0,748250518 |
| NM_029858.2 | 0,812914143 |
| NM_029859.1 | 1,100874326 |
| NM_029861.2 | 0,897182876 |
| NM_029862.4 | 1,060844182 |
| NM_029865.2 | 1,041044199 |
| NM_029868.2 | 1,282715174 |

|             |             |
|-------------|-------------|
| NM_029872.1 | 0,849455936 |
| NM_029875.2 | 0,891651251 |
| NM_029884.1 | 0,88785298  |
| NM_029896.1 | 0,777403136 |
| NM_029909.1 | 0,865817046 |
| NM_029926.5 | 0,941865624 |
| NM_029928.2 | 1,567762991 |
| NM_029929.3 | 0,525088083 |
| NM_029930.2 | 0,584000404 |
| NM_029936.2 | 0,940330153 |
| NM_029942.1 | 0,758789258 |
| NM_029951.1 | 1,032740601 |
| NM_029956.3 | 0,783881495 |
| NM_029963.2 | 1,006066802 |
| NM_029975.2 | 0,27934686  |
| NM_029976.3 | 0,769099604 |
| NM_029978.1 | 1,003209954 |
| NM_029979.3 | 0,843591005 |
| NM_029981.1 | 0,498833679 |
| NM_029985.2 | 0,995399932 |
| NM_029999.4 | 0,849524899 |
| NM_030004.3 | 0,900299539 |
| NM_030018.3 | 1,128749556 |
| NM_030024.2 | 1,108519286 |
| NM_030026.2 | 1,15584948  |
| NM_030060.2 | 0,554259643 |
| NM_030075.2 | 1,078224349 |
| NM_030082.4 | 1,227898286 |
| NM_030083.2 | 1,029850176 |
| NM_030087.2 | 1,060065386 |
| NM_030093.3 | 1,050004006 |
| NM_030096.2 | 1,006724394 |
| NM_030109.2 | 1,065690132 |
| NM_030112.2 | 1,852810807 |
| NM_030116.2 | 0,453485163 |
| NM_030131.3 | 0,782988752 |
| NM_030132.5 | 0,876212201 |
| NM_030139.4 | 0,798133886 |
| NM_030143.4 | 0,589925046 |
| NM_030150.2 | 0,758947854 |
| NM_030152.4 | 0,953326586 |
| NM_030165.3 | 0,908133108 |
| NM_030185.3 | 1,057828203 |
| NM_030188.3 | 0,993233281 |
| NM_030198.3 | 0,697669481 |
| NM_030203.2 | 1,21638674  |
| NM_030205.4 | 0,989725727 |
| NM_030208.3 | 0,641357587 |
| NM_030210.1 | 1,175731429 |
| NM_030215.3 | 0,895418862 |
| NM_030224.1 | 0,997667358 |
| NM_030226.3 | 0,879930216 |
| NM_030229.4 | 0,997667358 |
| NM_030233.1 | 1,176735858 |
| NM_030235.1 | 1,202317072 |
| NM_030238.2 | 0,877428811 |

|             |             |
|-------------|-------------|
| NM_030240.1 | 0,977493937 |
| NM_030241.3 | 0,872958938 |
| NM_030244.3 | 0,836212793 |
| NM_030245.3 | 0,865899971 |
| NM_030250.2 | 0,865413324 |
| NM_030252.2 | 1,03184868  |
| NM_030256.2 | 0,472579275 |
| NM_030259.1 | 0,912835762 |
| NM_030260.3 | 0,843266457 |
| NM_030261.4 | 0,816273293 |
| NM_030561.3 | 1,061011317 |
| NM_030563.2 | 1,08836439  |
| NM_030614.2 | 2,31458827  |
| NM_030678.3 | 1,073130586 |
| NM_030685.3 | 0,99866825  |
| NM_030686.2 | 0,914528411 |
| NM_030689.4 | 0,872958938 |
| NM_030691.1 | 0,313097735 |
| NM_030694.1 | 0,797093875 |
| NM_030697.2 | 0,717073413 |
| NM_030701.3 | 1,096202405 |
| NM_030704.3 | 0,960756775 |
| NM_030705.4 | 0,968708317 |
| NM_030719.3 | 1,00445421  |
| NM_030726.1 | 0,72557626  |
| NM_030730.2 | 1,075813626 |
| NM_030743.5 | 0,325326312 |
| NM_030750.3 | 0,652547481 |
| NM_031156.3 | 0,994360401 |
| NM_031165.4 | 0,920059015 |
| NM_031166.2 | 0,726777545 |
| NM_031170.2 | 1,304641929 |
| NM_031178.2 | 0,721996114 |
| NM_031179.2 | 0,862934145 |
| NM_031180.2 | 1,026172139 |
| NM_031185.3 | 0,812756186 |
| NM_031195.2 | 0,497032835 |
| NM_031197.2 | 0,735123316 |
| NM_031199.4 | 1,287897862 |
| NM_031247.3 | 0,679262882 |
| NM_031248.3 | 0,928643382 |
| NM_031249.2 | 0,934371241 |
| NM_031258.3 | 0,420522155 |
| NM_031376.3 | 0,332555786 |
| NM_031380.2 | 0,394140191 |
| NM_031392.2 | 1,150872127 |
| NM_031842.2 | 1,038018499 |
| NM_031843.2 | 0,769629104 |
| NM_031863.3 | 0,677660847 |
| NM_031868.2 | 0,958389914 |
| NM_031871.1 | 1,131682376 |
| NM_031872.2 | 0,8953425   |
| NM_032002.2 | 0,97411366  |
| NM_032004.2 | 0,762922097 |
| NM_032394.3 | 0,886815429 |
| NM_032400.2 | 0,746317054 |

|             |             |
|-------------|-------------|
| NM_032541.1 | 1,425239082 |
| NM_032544.3 | 1,066055846 |
| NM_033037.3 | 1,071340256 |
| NM_033041.4 | 0,554259643 |
| NM_033073.3 | 0,665111572 |
| NM_033074.3 | 0,902910318 |
| NM_033144.2 | 0,744737605 |
| NM_033217.3 | 1,042607329 |
| NM_033218.1 | 0,758227192 |
| NM_033268.4 | 0,427571725 |
| NM_033314.3 | 0,879993772 |
| NM_033370.3 | 0,935005005 |
| NM_033444.2 | 0,501962564 |
| NM_033477.2 | 1,101257046 |
| NM_033509.4 | 0,835883462 |
| NM_033521.3 | 0,951617214 |
| NM_033523.4 | 0,779634094 |
| NM_033524.3 | 0,700782007 |
| NM_033526.2 | 1,058457125 |
| NM_033560.3 | 0,632806153 |
| NM_033561.2 | 1,057527399 |
| NM_033565.2 | 0,872958938 |
| NM_033570.2 | 0,850618881 |
| NM_033573.2 | 0,95281246  |
| NM_033574.3 | 1,299990799 |
| NM_033575.3 | 0,872958938 |
| NM_033576.1 | 1,183279889 |
| NM_033577.1 | 0,83310367  |
| NM_033578.3 | 1,032879147 |
| NM_033579.1 | 1,239338333 |
| NM_033580.2 | 0,665111572 |
| NM_033581.3 | 1,00012618  |
| NM_033582.2 | 1,188710043 |
| NM_033583.3 | 0,580920234 |
| NM_033584.1 | 0,808919479 |
| NM_033585.1 | 1,859289167 |
| NM_033586.2 | 1,208712376 |
| NM_033587.3 | 0,867131442 |
| NM_033588.4 | 0,707565502 |
| NM_033589.1 | 0,830059242 |
| NM_033590.3 | 1,048396206 |
| NM_033591.3 | 1,197200829 |
| NM_033592.3 | 0,665111572 |
| NM_033593.3 | 0,956779351 |
| NM_033594.2 | 0,581972625 |
| NM_033595.4 | 0,916225124 |
| NM_033596.3 | 0,682614508 |
| NM_033612.2 | 0,576882486 |
| NM_033617.3 | 0,951199125 |
| NM_033618.3 | 0,906970325 |
| NM_052835.3 | 0,816095803 |
| NM_052993.3 | 0,864855855 |
| NM_053009.3 | 0,949650846 |
| NM_053015.3 | 0,645549467 |
| NM_053068.3 | 1,013503347 |
| NM_053071.2 | 1,108489368 |

|             |             |
|-------------|-------------|
| NM_053072.3 | 0,74012997  |
| NM_053074.2 | 0,859867999 |
| NM_053075.3 | 0,965767022 |
| NM_053080.3 | 0,566052402 |
| NM_053082.3 | 0,619241808 |
| NM_053085.2 | 0,816273293 |
| NM_053088.2 | 0,824159991 |
| NM_053089.3 | 0,970523567 |
| NM_053096.3 | 0,702902002 |
| NM_053098.2 | 0,460461857 |
| NM_053099.2 | 0,984365126 |
| NM_053100.2 | 0,816860328 |
| NM_053102.2 | 0,898249457 |
| NM_053103.5 | 0,65375097  |
| NM_053106.2 | 0,85182894  |
| NM_053110.4 | 0,231489021 |
| NM_053119.2 | 1,101889873 |
| NM_053122.4 | 1,04815173  |
| NM_053124.2 | 0,9007511   |
| NM_053128.2 | 0,36278813  |
| NM_053129.3 | 0,665111572 |
| NM_053130.3 | 0,754333856 |
| NM_053132.3 | 1,558855246 |
| NM_053133.1 | 1,45115252  |
| NM_053134.3 | 0,345346393 |
| NM_053135.2 | 1,995334715 |
| NM_053136.3 | 1,266270108 |
| NM_053137.2 | 1,405804004 |
| NM_053138.2 | 2,793468602 |
| NM_053139.3 | 1,120667443 |
| NM_053140.3 | 1,304641929 |
| NM_053141.3 | 0,997667358 |
| NM_053142.3 | 0,885254134 |
| NM_053143.2 | 0,928062658 |
| NM_053144.2 | 1,070667408 |
| NM_053145.2 | 1,122375777 |
| NM_053146.2 | 0,36278813  |
| NM_053147.3 | 1,141908421 |
| NM_053157.2 | 0,962922723 |
| NM_053158.3 | 0,881809213 |
| NM_053159.3 | 1,081608684 |
| NM_053161.2 | 1,074411001 |
| NM_053162.2 | 1,064299665 |
| NM_053163.1 | 0,9551942   |
| NM_053164.3 | 1,129227888 |
| NM_053166.2 | 0,914528411 |
| NM_053173.2 | 0,602195612 |
| NM_053176.2 | 0,80763548  |
| NM_053177.1 | 0,856062959 |
| NM_053179.3 | 0,631988486 |
| NM_053181.3 | 1,177801742 |
| NM_053190.2 | 1,090562405 |
| NM_053191.2 | 0,285047816 |
| NM_053194.4 | 0,857086957 |
| NM_053196.3 | 1,168177779 |
| NM_053199.3 | 0,665111572 |



|             |             |
|-------------|-------------|
| NM_053200.2 | 1,195343615 |
| NM_053201.4 | 0,857004075 |
| NM_053207.2 | 0,868340108 |
| NM_053208.4 | 1,149596397 |
| NM_053214.2 | 0,376208693 |
| NM_053216.2 | 1,371792617 |
| NM_053247.4 | 0,415371235 |
| NM_053255.3 | 1,069225619 |
| NM_053261.2 | 0,876577837 |
| NM_053262.3 | 0,871106127 |
| NM_053267.2 | 0,762922097 |
| NM_053272.2 | 0,980407848 |
| NM_053273.2 | 0,832479812 |
| NM_054041.2 | 0,646131961 |
| NM_054042.2 | 0,514054679 |
| NM_054045.4 | 0,997667358 |
| NM_054051.1 | 0,86946244  |
| NM_054055.2 | 0,948399834 |
| NM_054056.2 | 0,779902401 |
| NM_054057.4 | 1,174672857 |
| NM_054077.4 | 0,826288916 |
| NM_054098.3 | 0,811671841 |
| NM_078477.2 | 1,052711074 |
| NM_080419.2 | 0,746948566 |
| NM_080445.4 | 0,860144288 |
| NM_080446.2 | 1,106745655 |
| NM_080450.4 | 2,161612608 |
| NM_080451.2 | 0,972374382 |
| NM_080455.2 | 0,972546237 |
| NM_080456.1 | 0,860690326 |
| NM_080463.3 | 1,018027916 |
| NM_080464.2 | 0,445927077 |
| NM_080466.2 | 0,997667358 |
| NM_080555.2 | 0,867585172 |
| NM_080556.3 | 0,945633845 |
| NM_080557.2 | 0,828982431 |
| NM_080559.1 | 0,52751042  |
| NM_080560.3 | 0,877176131 |
| NM_080575.2 | 1,22388399  |
| NM_080633.2 | 1,087475231 |
| NM_080635.1 | 0,976219585 |
| NM_080638.3 | 0,598600415 |
| NM_080639.3 | 1,533451679 |
| NM_080640.5 | 0,948399834 |
| NM_080643.2 | 0,959295536 |
| NM_080708.1 | 0,820495396 |
| NM_080793.5 | 0,881888677 |
| NM_080837.2 | 0,812679908 |
| NM_080843.2 | 1,028151638 |
| NM_080844.4 | 0,665111572 |
| NM_126165.1 | 0,950357751 |
| NM_130447.3 | 0,913705253 |
| NM_130449.2 | 0           |
| NM_130450.2 | 1,061087602 |
| NM_130451.3 | 0,697000483 |
| NM_130796.4 | 0,867659713 |

|             |             |
|-------------|-------------|
| NM_130860.3 | 0,685896308 |
| NM_130866.4 | 0,997667358 |
| NM_130878.2 | 0,266044629 |
| NM_130884.4 | 1,019742358 |
| NM_130889.2 | 0,817277319 |
| NM_130893.3 | 2,494168394 |
| NM_133167.3 | 0,733617197 |
| NM_133185.2 | 0,949744472 |
| NM_133198.2 | 0,999897237 |
| NM_133210.2 | 1,022200162 |
| NM_133218.2 | 0,997667358 |
| NM_133222.3 | 0,817217915 |
| NM_133223.4 | 0,997667358 |
| NM_133225.3 | 0,866395337 |
| NM_133227.3 | 0,936639833 |
| NM_133228.3 | 1,046970686 |
| NM_133229.2 | 0,949273046 |
| NM_133231.2 | 0,981599509 |
| NM_133236.3 | 0,63739859  |
| NM_133237.3 | 0,874473615 |
| NM_133238.5 | 0,603851295 |
| NM_133345.2 | 0,884519679 |
| NM_133346.2 | 1,058371985 |
| NM_133348.2 | 1,825919504 |
| NM_133352.2 | 0,89864308  |
| NM_133354.2 | 1,041375658 |
| NM_133358.3 | 1,082085365 |
| NM_133363.3 | 0,701063549 |
| NM_133501.2 | 0,606425257 |
| NM_133655.2 | 0,98883297  |
| NM_133657.1 | 0,69836715  |
| NM_133662.2 | 0,879522539 |
| NM_133666.3 | 1,134845685 |
| NM_133667.2 | 0,970334005 |
| NM_133668.3 | 0,774887268 |
| NM_133676.2 | 1,021433644 |
| NM_133678.3 | 1,150391784 |
| NM_133684.3 | 1,003864049 |
| NM_133685.2 | 0,527845007 |
| NM_133686.1 | 0,559298367 |
| NM_133693.2 | 0,944434773 |
| NM_133701.2 | 0,989498991 |
| NM_133704.4 | 0,695343916 |
| NM_133705.2 | 0,975695331 |
| NM_133706.2 | 0,992882382 |
| NM_133710.3 | 1,330223144 |
| NM_133712.2 | 0,997667358 |
| NM_133716.3 | 0,859026935 |
| NM_133718.4 | 0,923839973 |
| NM_133719.2 | 0,849225502 |
| NM_133721.2 | 1,050176166 |
| NM_133722.2 | 0,978718855 |
| NM_133724.3 | 0,980266183 |
| NM_133726.2 | 0,902567901 |
| NM_133727.2 | 0,985919463 |
| NM_133728.3 | 0,977834731 |

|             |             |
|-------------|-------------|
| NM_133735.2 | 0,94393303  |
| NM_133737.2 | 0,966766156 |
| NM_133738.1 | 0,848692055 |
| NM_133739.2 | 1,22629946  |
| NM_133740.2 | 0,905100283 |
| NM_133744.4 | 0,997667358 |
| NM_133746.5 | 0,578357889 |
| NM_133747.2 | 1,115039988 |
| NM_133757.2 | 1,108519286 |
| NM_133763.1 | 0,912523205 |
| NM_133777.2 | 0,838769946 |
| NM_133783.2 | 1,040413387 |
| NM_133787.2 | 0,977604577 |
| NM_133791.4 | 0,883512578 |
| NM_133794.2 | 0,914505689 |
| NM_133795.1 | 1,000299725 |
| NM_133800.3 | 0,712619541 |
| NM_133807.1 | 0,851847337 |
| NM_133809.1 | 0,997667358 |
| NM_133818.1 | 0,912673384 |
| NM_133819.3 | 1,00082761  |
| NM_133821.3 | 1,065042296 |
| NM_133831.3 | 0,962351699 |
| NM_133832.3 | 1,006737061 |
| NM_133835.2 | 1,030922936 |
| NM_133838.4 | 0,475079694 |
| NM_133840.2 | 1,014341464 |
| NM_133854.3 | 0,913975731 |
| NM_133859.2 | 0,476208393 |
| NM_133883.2 | 0,971887839 |
| NM_133887.4 | 0,936554735 |
| NM_133888.2 | 0,53136631  |
| NM_133891.3 | 0,827800733 |
| NM_133898.4 | 1,071859066 |
| NM_133907.3 | 0,958951908 |
| NM_133911.1 | 0,965807542 |
| NM_133916.2 | 0,937013153 |
| NM_133917.3 | 0,865404776 |
| NM_133923.6 | 0,676384649 |
| NM_133925.2 | 0,930247444 |
| NM_133926.2 | 0,867810907 |
| NM_133928.2 | 1,003301244 |
| NM_133933.4 | 0,845454486 |
| NM_133934.4 | 0,962951509 |
| NM_133937.1 | 0,946208979 |
| NM_133939.1 | 0,823739876 |
| NM_133940.3 | 0,85842741  |
| NM_133948.5 | 0,754012623 |
| NM_133950.2 | 0,91197508  |
| NM_133955.4 | 1,24320438  |
| NM_133964.2 | 1,077976368 |
| NM_133967.3 | 1,126676068 |
| NM_133969.2 | 1,12465921  |
| NM_133976.2 | 1,000410086 |
| NM_133977.2 | 0,976133208 |
| NM_133982.1 | 0,408136646 |

|             |             |
|-------------|-------------|
| NM_133983.4 | 0,434737731 |
| NM_133984.2 | 1,134602093 |
| NM_133990.5 | 0,635906956 |
| NM_133993.3 | 1,005003147 |
| NM_133994.3 | 0,79492208  |
| NM_133995.4 | 0,521507937 |
| NM_133996.3 | 0,712619541 |
| NM_133997.2 | 0,810604728 |
| NM_133999.1 | 0,956578456 |
| NM_134005.2 | 0,823211863 |
| NM_134007.4 | 1,092447134 |
| NM_134013.3 | 1,019015447 |
| NM_134020.1 | 0,971703341 |
| NM_134021.2 | 1,095824115 |
| NM_134023.1 | 0,665111572 |
| NM_134032.2 | 0,498833679 |
| NM_134033.2 | 0,878414138 |
| NM_134040.1 | 0,90420642  |
| NM_134041.3 | 0,450868902 |
| NM_134046.5 | 0,943739392 |
| NM_134052.2 | 0,923576227 |
| NM_134054.2 | 0,916024237 |
| NM_134058.3 | 0,958828726 |
| NM_134065.4 | 0,846455831 |
| NM_134072.1 | 0,589319788 |
| NM_134077.4 | 0,801348465 |
| NM_134078.4 | 0,979392419 |
| NM_134081.5 | 0,852230836 |
| NM_134082.3 | 1,330223144 |
| NM_134090.2 | 0,660221046 |
| NM_134093.2 | 0,69836715  |
| NM_134097.3 | 0,920597378 |
| NM_134099.2 | 0,9140587   |
| NM_134100.4 | 0,910380481 |
| NM_134116.5 | 0,623542099 |
| NM_134118.5 | 0,997667358 |
| NM_134122.2 | 0,677902179 |
| NM_134123.3 | 0,946976525 |
| NM_134138.1 | 0,849757372 |
| NM_134141.4 | 1,995334715 |
| NM_134150.2 | 0,896873108 |
| NM_134158.1 | 0,336661413 |
| NM_134164.5 | 1,289544819 |
| NM_134188.3 | 0,904893455 |
| NM_134247.3 | 0,947105724 |
| NM_134250.2 | 0,315501643 |
| NM_134420.4 | 0,982100917 |
| NM_134438.3 | 1,621209456 |
| NM_138302.1 | 0,885254134 |
| NM_138310.1 | 0,761997903 |
| NM_138584.2 | 0,901737804 |
| NM_138591.2 | 1,009002145 |
| NM_138593.2 | 0,856564812 |
| NM_138595.2 | 0,744527879 |
| NM_138597.2 | 1,065351294 |
| NM_138599.5 | 0,983629545 |

|             |             |
|-------------|-------------|
| NM_138601.2 | 1,10903923  |
| NM_138602.4 | 0,754935918 |
| NM_138603.3 | 0,877169872 |
| NM_138606.2 | 0,977580095 |
| NM_138607.3 | 0,855709395 |
| NM_138628.3 | 0,949486047 |
| NM_138654.3 | 0,997667358 |
| NM_138659.2 | 0,985026567 |
| NM_138660.2 | 1,009117632 |
| NM_138665.2 | 1,043431915 |
| NM_138669.1 | 0,96721306  |
| NM_138671.2 | 1,496501037 |
| NM_138672.2 | 0,493582798 |
| NM_138673.2 | 0,872958938 |
| NM_138675.3 | 0,965404483 |
| NM_138682.2 | 0,562786715 |
| NM_138741.1 | 0,903322037 |
| NM_138742.1 | 0,820304272 |
| NM_138743.2 | 0,957927987 |
| NM_138745.2 | 0,957760663 |
| NM_138748.5 | 1,330223144 |
| NM_138751.2 | 0,719300349 |
| NM_138753.2 | 1,049502976 |
| NM_138756.4 | 0,581972625 |
| NM_138757.2 | 2,244751555 |
| NM_138758.1 | 0,623542099 |
| NM_138951.1 | 1,376092907 |
| NM_138953.2 | 0,959035241 |
| NM_138956.3 | 0,923766072 |
| NM_139001.2 | 0,858976233 |
| NM_139063.1 | 0,943155636 |
| NM_139064.2 | 0,862390428 |
| NM_139117.2 | 0,872958938 |
| NM_139138.3 | 0,428903724 |
| NM_139139.2 | 1,330223144 |
| NM_139143.3 | 0,732865928 |
| NM_139147.3 | 1,107839213 |
| NM_139154.2 | 1,055055303 |
| NM_139200.4 | 0,748250518 |
| NM_139218.1 | 0,06235421  |
| NM_139229.4 | 1,018560915 |
| NM_139236.3 | 0,961356076 |
| NM_139269.2 | 1,021197248 |
| NM_139272.2 | 0,914064983 |
| NM_139291.3 | 0,72557626  |
| NM_139297.6 | 0,712336475 |
| NM_139307.3 | 0,713659862 |
| NM_144491.2 | 1,139271757 |
| NM_144509.2 | 1,025691722 |
| NM_144520.2 | 1,022000708 |
| NM_144522.5 | 0,815273417 |
| NM_144523.2 | 0,98149925  |
| NM_144525.3 | 0,816273293 |
| NM_144526.3 | 0,049883368 |
| NM_144531.3 | 0,949000657 |
| NM_144539.5 | 0,384926776 |

|             |             |
|-------------|-------------|
| NM_144545.4 | 0,936639833 |
| NM_144549.4 | 1,077790186 |
| NM_144559.2 | 0,634879228 |
| NM_144784.3 | 1,09743088  |
| NM_144789.2 | 0,598600415 |
| NM_144795.3 | 0,665111572 |
| NM_144797.3 | 0,556974766 |
| NM_144799.2 | 0,882617938 |
| NM_144804.1 | 1,036039179 |
| NM_144807.3 | 0,975937473 |
| NM_144812.2 | 1,263711986 |
| NM_144818.3 | 0,42542042  |
| NM_144820.3 | 0,784573359 |
| NM_144821.4 | 1,455420616 |
| NM_144826.3 | 0,907443527 |
| NM_144831.2 | 0,870882771 |
| NM_144835.4 | 0,869342857 |
| NM_144837.3 | 0,92350024  |
| NM_144846.5 | 0,761578136 |
| NM_144848.2 | 0,62739906  |
| NM_144854.2 | 0,581972625 |
| NM_144857.1 | 0,997667358 |
| NM_144858.2 | 1,496501037 |
| NM_144866.3 | 0,920214205 |
| NM_144872.1 | 1,140191266 |
| NM_144874.4 | 1,015865688 |
| NM_144875.2 | 0,795016176 |
| NM_144877.1 | 1,437814721 |
| NM_144880.4 | 0,99483837  |
| NM_144881.4 | 1,163945251 |
| NM_144884.2 | 0,975692306 |
| NM_144887.4 | 0,909337726 |
| NM_144888.2 | 1,330223144 |
| NM_144894.3 | 0,798133886 |
| NM_144897.3 | 1,419757394 |
| NM_144898.2 | 1,020307313 |
| NM_144900.2 | 0,81918085  |
| NM_144903.3 | 0,783881495 |
| NM_144907.1 | 0,941262136 |
| NM_144908.3 | 1,204081294 |
| NM_144910.2 | 0,544182195 |
| NM_144912.3 | 1,425239082 |
| NM_144916.3 | 1,054496511 |
| NM_144918.2 | 0,936723877 |
| NM_144920.3 | 0,920923715 |
| NM_144923.3 | 0,36278813  |
| NM_144931.3 | 1,696034508 |
| NM_144936.1 | 0,831690148 |
| NM_145079.3 | 0,656360104 |
| NM_145134.3 | 0,356309771 |
| NM_145135.3 | 1,026585252 |
| NM_145138.2 | 0,838288962 |
| NM_145139.2 | 0,987149261 |
| NM_145140.2 | 1,330223144 |
| NM_145144.1 | 0,79278924  |
| NM_145146.2 | 0,748250518 |

|             |             |
|-------------|-------------|
| NM_145151.3 | 1,022384342 |
| NM_145152.4 | 0,611902646 |
| NM_145216.3 | 0,415694732 |
| NM_145218.3 | 0,881659525 |
| NM_145219.4 | 0,544182195 |
| NM_145222.2 | 0,06235421  |
| NM_145226.2 | 0,688530993 |
| NM_145353.2 | 1,200582752 |
| NM_145354.5 | 0,917791321 |
| NM_145356.3 | 0,767436429 |
| NM_145359.2 | 0,961112968 |
| NM_145360.2 | 0,936449035 |
| NM_145362.2 | 1,330223144 |
| NM_145365.3 | 0,498833679 |
| NM_145367.4 | 0,730000506 |
| NM_145371.4 | 0,962493188 |
| NM_145378.4 | 1,312720207 |
| NM_145379.2 | 0,453485163 |
| NM_145380.2 | 1,005046554 |
| NM_145381.2 | 0,997667358 |
| NM_145393.4 | 0,907163915 |
| NM_145394.3 | 0,914356991 |
| NM_145396.4 | 1,012940893 |
| NM_145404.1 | 0,834696127 |
| NM_145410.4 | 0,931156201 |
| NM_145415.2 | 0,927655613 |
| NM_145416.3 | 1,050889186 |
| NM_145422.4 | 0,971549441 |
| NM_145427.2 | 1,041170295 |
| NM_145431.2 | 1,058749033 |
| NM_145432.3 | 1,049784309 |
| NM_145433.1 | 1,080029305 |
| NM_145434.4 | 0,966837216 |
| NM_145437.2 | 0,445608249 |
| NM_145440.1 | 1,662778929 |
| NM_145443.2 | 1,074550155 |
| NM_145445.4 | 0,954852483 |
| NM_145450.3 | 0,845480812 |
| NM_145452.3 | 0,831917331 |
| NM_145456.2 | 0,692023601 |
| NM_145459.3 | 0,962898699 |
| NM_145463.5 | 0,843266457 |
| NM_145465.2 | 1,037574052 |
| NM_145473.3 | 0,598600415 |
| NM_145478.2 | 1,058242182 |
| NM_145480.1 | 1,006074667 |
| NM_145483.2 | 1,035578717 |
| NM_145486.5 | 1,141167457 |
| NM_145488.1 | 1,172823126 |
| NM_145489.2 | 0,972725674 |
| NM_145491.2 | 0,971226039 |
| NM_145497.2 | 1,097434093 |
| NM_145500.3 | 1,077480746 |
| NM_145505.4 | 0,934707767 |
| NM_145510.1 | 0,997667358 |
| NM_145513.4 | 1,282715174 |

|             |             |
|-------------|-------------|
| NM_145517.4 | 1,020977343 |
| NM_145519.2 | 1,085985452 |
| NM_145523.3 | 0,551651362 |
| NM_145526.2 | 0,860058067 |
| NM_145529.3 | 0,920749693 |
| NM_145531.2 | 0,842292933 |
| NM_145532.3 | 0,740204814 |
| NM_145534.2 | 1,039236831 |
| NM_145538.2 | 0,831680669 |
| NM_145542.3 | 1,119923546 |
| NM_145546.1 | 0,936142527 |
| NM_145549.1 | 1,028844463 |
| NM_145562.2 | 1,026153212 |
| NM_145567.1 | 1,077019064 |
| NM_145568.3 | 1,179061423 |
| NM_145569.4 | 1,013185797 |
| NM_145572.2 | 4,323225217 |
| NM_145577.2 | 1,074043806 |
| NM_145578.3 | 0,753793115 |
| NM_145579.3 | 0,886815429 |
| NM_145580.2 | 1,001301847 |
| NM_145584.2 | 0,817416533 |
| NM_145587.2 | 0,96959999  |
| NM_145589.2 | 1,760589455 |
| NM_145595.2 | 1,119782114 |
| NM_145598.2 | 1,07723592  |
| NM_145599.4 | 1,839449191 |
| NM_145600.1 | 0,981669776 |
| NM_145606.3 | 0,977374947 |
| NM_145610.2 | 0,902836997 |
| NM_145611.4 | 0,871420979 |
| NM_145614.4 | 1,009580082 |
| NM_145615.4 | 1,036503586 |
| NM_145622.2 | 0,830302681 |
| NM_145624.4 | 0,837420269 |
| NM_145625.3 | 0,956790326 |
| NM_145630.2 | 0,762193075 |
| NM_145635.2 | 1,1009508   |
| NM_145700.2 | 0,931156201 |
| NM_145705.3 | 0,912153013 |
| NM_145706.2 | 0,874146637 |
| NM_145713.4 | 0,739649938 |
| NM_145741.2 | 0,474138942 |
| NM_145822.2 | 0,850793528 |
| NM_145824.4 | 1,496501037 |
| NM_145825.2 | 0,798133886 |
| NM_145828.3 | 1,083931828 |
| NM_145836.2 | 0,937943053 |
| NM_145837.3 | 0,974192832 |
| NM_145840.3 | 0,955880243 |
| NM_145852.2 | 0,786205255 |
| NM_145923.4 | 0,70854743  |
| NM_145925.2 | 2,494168394 |
| NM_145926.3 | 0,927933746 |
| NM_145930.2 | 1,012114987 |
| NM_145935.3 | 0,076743643 |



|             |             |
|-------------|-------------|
| NM_145937.3 | 0,905516403 |
| NM_145938.4 | 0,897900622 |
| NM_145940.2 | 0,919527272 |
| NM_145943.1 | 0,984696601 |
| NM_145944.4 | 0,970484963 |
| NM_145954.1 | 0,989079841 |
| NM_145955.3 | 0,90229168  |
| NM_145962.2 | 0,901833826 |
| NM_145969.4 | 0,744527879 |
| NM_145973.2 | 0,824159991 |
| NM_145983.2 | 1,022913739 |
| NM_145985.4 | 0,911435305 |
| NM_145986.2 | 0,770924776 |
| NM_145991.2 | 1,008674721 |
| NM_145997.2 | 0,913913639 |
| NM_145999.2 | 1,072899142 |
| NM_146002.2 | 0,947914917 |
| NM_146004.1 | 0,532089257 |
| NM_146007.2 | 0,429225241 |
| NM_146008.2 | 1,003959984 |
| NM_146024.1 | 0,570095633 |
| NM_146032.3 | 0,916151037 |
| NM_146033.3 | 1,163945251 |
| NM_146035.2 | 0,849235303 |
| NM_146036.1 | 1,425239082 |
| NM_146047.2 | 0,956559035 |
| NM_146051.3 | 1,140191266 |
| NM_146057.3 | 0,781462055 |
| NM_146063.1 | 0,983549423 |
| NM_146069.4 | 0,540403152 |
| NM_146074.1 | 1,145469929 |
| NM_146079.1 | 1,575264249 |
| NM_146091.4 | 1,102684974 |
| NM_146094.2 | 0,399066943 |
| NM_146103.2 | 0,955703059 |
| NM_146104.3 | 1,021141884 |
| NM_146105.3 | 1,085688889 |
| NM_146108.2 | 1,100872453 |
| NM_146115.4 | 0,736752579 |
| NM_146116.2 | 1,021040042 |
| NM_146119.2 | 0,472632655 |
| NM_146124.4 | 0,634879228 |
| NM_146125.2 | 1,334851156 |
| NM_146126.4 | 1,02336485  |
| NM_146129.3 | 0,810604728 |
| NM_146135.2 | 0,453485163 |
| NM_146145.2 | 0,730318589 |
| NM_146152.3 | 0,821608412 |
| NM_146157.4 | 1,373599985 |
| NM_146159.1 | 0,886170191 |
| NM_146167.3 | 0,230230929 |
| NM_146174.1 | 1,017851379 |
| NM_146175.3 | 0,935611493 |
| NM_146179.2 | 0,997667358 |
| NM_146193.2 | 0,996567848 |
| NM_146200.1 | 0,919336248 |

|             |             |
|-------------|-------------|
| NM_146202.1 | 0,955834787 |
| NM_146205.2 | 0,857884294 |
| NM_146208.2 | 0,285047816 |
| NM_146211.3 | 0,809503315 |
| NM_146214.3 | 1,299990799 |
| NM_146218.4 | 1,024154102 |
| NM_146219.1 | 0,878897434 |
| NM_146229.2 | 0,878563811 |
| NM_146234.3 | 0,938251764 |
| NM_146235.3 | 0,579290724 |
| NM_146240.4 | 0,781506097 |
| NM_146241.2 | 0,892649741 |
| NM_146253.5 | 0,89872514  |
| NM_146256.3 | 0,904393233 |
| NM_146261.2 | 0,893462256 |
| NM_146337.1 | 1,118596734 |
| NM_146410.1 | 0,623542099 |
| NM_146578.2 | 0,821608412 |
| NM_146787.2 | 0,517309    |
| NM_146923.2 | 0,728027531 |
| NM_147155.2 | 0,723308834 |
| NM_147219.2 | 1,019654517 |
| NM_147776.4 | 0,869761286 |
| NM_147778.3 | 1,053757412 |
| NM_148924.3 | 0,890479956 |
| NM_148932.2 | 0,984185366 |
| NM_148933.1 | 1,995334715 |
| NM_148934.2 | 1,076063178 |
| NM_148938.3 | 1,087844282 |
| NM_148941.2 | 1,249331196 |
| NM_148952.1 | 0,902772243 |
| NM_148953.2 | 0,997667358 |
| NM_152803.4 | 0,297343997 |
| NM_152804.2 | 0,609359572 |
| NM_152810.2 | 0,869815028 |
| NM_152811.1 | 0,477145258 |
| NM_152812.3 | 0,935313148 |
| NM_152814.2 | 1,104214357 |
| NM_152824.1 | 0,981795377 |
| NM_152839.3 | 1,636174467 |
| NM_152895.2 | 1,058500733 |
| NM_153053.4 | 0,929109703 |
| NM_153057.4 | 0,89880058  |
| NM_153063.3 | 0,902651419 |
| NM_153064.5 | 1,046467198 |
| NM_153074.3 | 0,421938369 |
| NM_153076.2 | 1,080806304 |
| NM_153083.5 | 0,961468808 |
| NM_153088.2 | 1,009390172 |
| NM_153098.3 | 0,316292518 |
| NM_153100.2 | 1,44822681  |
| NM_153104.3 | 0,922504661 |
| NM_153105.7 | 1,496501037 |
| NM_153107.2 | 0,748250518 |
| NM_153112.3 | 0,847532949 |
| NM_153117.2 | 0,948945681 |

|              |             |
|--------------|-------------|
| NM_153119.3  | 0,236289637 |
| NM_153121.2  | 0,792883005 |
| NM_153122.2  | 1,22686121  |
| NM_153127.3  | 0,833627821 |
| NM_153129.2  | 0,914832313 |
| NM_153133.2  | 1,219371215 |
| NM_153134.3  | 0,98073066  |
| NM_153136.4  | 0,851342812 |
| NM_153137.4  | 0,878897434 |
| NM_153139.4  | 1,25059711  |
| NM_153142.3  | 0,840516891 |
| NM_153143.4  | 0,801755781 |
| NM_153150.2  | 0,812136235 |
| NM_153151.3  | 1,140191266 |
| NM_153152.3  | 1,092939762 |
| NM_153159.2  | 0,887953205 |
| NM_153161.3  | 0,88854749  |
| NM_153170.3  | 0,69836715  |
| NM_153173.4  | 0,945336244 |
| NM_153175.3  | 0,898389675 |
| NM_153176.4  | 1,034327471 |
| NM_153177.3  | 1,01325591  |
| NM_153178.4  | 0,855934732 |
| NM_153388.4  | 1,592767185 |
| NM_153399.2  | 0,712619541 |
| NM_153405.2  | 0,769035255 |
| NM_153407.2  | 1,153552882 |
| NM_153416.2  | 0,89492251  |
| NM_153422.2  | 1,069248872 |
| NM_153502.4  | 1,662778929 |
| NM_153503.2  | 1,014868519 |
| NM_153505.4  | 0,331380677 |
| NM_153507.2  | 0,511304521 |
| NM_153510.3  | 0,476663293 |
| NM_153511.3  | 0,748250518 |
| NM_153514.5  | 0,820661859 |
| NM_153521.2  | 1,009867094 |
| NM_153525.5  | 0,981883563 |
| NM_153526.5  | 1,176551058 |
| NM_153528.2  | 0,872958938 |
| NM_153535.2  | 0,766066007 |
| NM_153546.4  | 0,399066943 |
| NM_153550.3  | 0,95981811  |
| NM_153552.3  | 0,818551265 |
| NM_153560.4  | 1,009007878 |
| NM_153562.4  | 0,574414539 |
| NM_153563.2  | 1,073275494 |
| NM_153564.2  | 1,227143121 |
| NM_153565.2  | 1,425239082 |
| NM_153566.2  | 1,026488859 |
| NM_153570.2  | 0,975032671 |
| NM_153574.2  | 1,24061309  |
| NM_153577.2  | 0,748250518 |
| NM_153578.2  | 1,055827338 |
| NM_153582.5  | 1,099286824 |
| NM_153583.10 | 0,665111572 |

|             |             |
|-------------|-------------|
| NM_153591.4 | 0,956097884 |
| NM_153596.3 | 1,310661039 |
| NM_153598.2 | 0,892649741 |
| NM_153762.3 | 0,916891534 |
| NM_153780.3 | 0,91897095  |
| NM_153781.1 | 1,006006002 |
| NM_153788.3 | 0,619241808 |
| NM_153789.3 | 0,96873564  |
| NM_153796.3 | 0,984517085 |
| NM_153798.2 | 0,971904482 |
| NM_153802.4 | 1,162961358 |
| NM_153806.1 | 0,920099036 |
| NM_153807.2 | 0,94890154  |
| NM_170591.1 | 0,795095305 |
| NM_170669.2 | 0,85813161  |
| NM_170758.3 | 0,419473775 |
| NM_170760.3 | 0,99893263  |
| NM_170777.3 | 0,712619541 |
| NM_170778.2 | 1,198329554 |
| NM_170779.1 | 1,214028953 |
| NM_170786.2 | 1,269758455 |
| NM_172049.2 | 1,001318473 |
| NM_172051.3 | 0,230230929 |
| NM_172054.4 | 0,924760897 |
| NM_172086.2 | 0,809144481 |
| NM_172116.4 | 1,152860058 |
| NM_172120.4 | 0,758227192 |
| NM_172124.2 | 0,997667358 |
| NM_172125.2 | 0,433768416 |
| NM_172126.2 | 0,904478648 |
| NM_172133.1 | 0,852844677 |
| NM_172134.2 | 0,938867015 |
| NM_172146.2 | 1,001835884 |
| NM_172151.4 | 0,934877104 |
| NM_172253.2 | 0,908112965 |
| NM_172255.3 | 0,727331687 |
| NM_172256.1 | 0,8953425   |
| NM_172260.3 | 1,033946171 |
| NM_172261.3 | 0,919848548 |
| NM_172268.2 | 1,496501037 |
| NM_172269.3 | 0,959716588 |
| NM_172282.2 | 0,570095633 |
| NM_172285.2 | 0,441663976 |
| NM_172288.2 | 0,946765962 |
| NM_172297.1 | 0,598600415 |
| NM_172300.3 | 0,859082025 |
| NM_172301.3 | 0,309136364 |
| NM_172307.3 | 0,81433965  |
| NM_172310.2 | 1,173187622 |
| NM_172338.2 | 0,975157538 |
| NM_172396.3 | 1,046381584 |
| NM_172397.3 | 0,772387632 |
| NM_172400.3 | 0,946458034 |
| NM_172405.3 | 2,59393513  |
| NM_172416.3 | 0,903240617 |
| NM_172422.3 | 0,877947275 |

|             |             |
|-------------|-------------|
| NM_172437.3 | 0,332555786 |
| NM_172442.3 | 0,594355022 |
| NM_172457.2 | 0,786494434 |
| NM_172462.4 | 1,006496272 |
| NM_172467.3 | 0,588787293 |
| NM_172468.2 | 1,108519286 |
| NM_172486.2 | 0,835765199 |
| NM_172488.2 | 0,556669468 |
| NM_172490.3 | 0,881272833 |
| NM_172499.2 | 1,096446304 |
| NM_172501.2 | 0,970072303 |
| NM_172503.3 | 0,970815027 |
| NM_172506.2 | 0,916225124 |
| NM_172507.5 | 1,006827272 |
| NM_172510.4 | 0,786040948 |
| NM_172514.3 | 0,592553946 |
| NM_172516.4 | 0,937202669 |
| NM_172518.3 | 0,946983722 |
| NM_172523.3 | 0,697790464 |
| NM_172527.2 | 1,41336209  |
| NM_172530.3 | 0,829130521 |
| NM_172532.3 | 1,090199101 |
| NM_172536.3 | 0,953216832 |
| NM_172541.2 | 0,955813552 |
| NM_172546.2 | 0,498833679 |
| NM_172550.4 | 1,150535743 |
| NM_172564.3 | 0,72557626  |
| NM_172567.3 | 1,047675747 |
| NM_172574.2 | 0,627640497 |
| NM_172578.2 | 0,29454941  |
| NM_172580.1 | 0,994238948 |
| NM_172584.3 | 1,08132814  |
| NM_172587.3 | 0,665111572 |
| NM_172588.2 | 0,816881998 |
| NM_172594.2 | 0,911918668 |
| NM_172599.4 | 1,01080786  |
| NM_172601.3 | 0,870835639 |
| NM_172607.3 | 1,10007083  |
| NM_172609.3 | 1,021479194 |
| NM_172612.3 | 0,809871149 |
| NM_172614.3 | 0,853473247 |
| NM_172621.2 | 0,79892884  |
| NM_172625.2 | 0,91126005  |
| NM_172630.2 | 0,897900622 |
| NM_172635.3 | 1,184729987 |
| NM_172647.2 | 0,943571984 |
| NM_172648.3 | 0,720090553 |
| NM_172656.5 | 0,917853969 |
| NM_172660.4 | 1,496501037 |
| NM_172666.3 | 0,942308252 |
| NM_172668.3 | 0,819512472 |
| NM_172671.2 | 1,007181897 |
| NM_172672.2 | 1,029093759 |
| NM_172678.3 | 0,980061463 |
| NM_172684.2 | 0,927961341 |
| NM_172685.3 | 0,575536631 |

|             |             |
|-------------|-------------|
| NM_172689.3 | 0,904692409 |
| NM_172693.3 | 1,304641929 |
| NM_172694.2 | 1,063043512 |
| NM_172695.2 | 0,939715723 |
| NM_172697.3 | 1,064284256 |
| NM_172705.2 | 0,906970325 |
| NM_172707.3 | 0,925324502 |
| NM_172709.3 | 0,996646303 |
| NM_172712.2 | 0,874877529 |
| NM_172713.2 | 0,881659525 |
| NM_172716.4 | 0,87951085  |
| NM_172719.2 | 0,987018718 |
| NM_172721.2 | 0,984483726 |
| NM_172733.1 | 0,902909264 |
| NM_172736.3 | 1,031980382 |
| NM_172738.3 | 0,988458121 |
| NM_172739.4 | 0,956097884 |
| NM_172742.2 | 0,932031347 |
| NM_172747.2 | 0,91766573  |
| NM_172748.2 | 1,054676921 |
| NM_172749.4 | 1,127797883 |
| NM_172757.3 | 0,825133864 |
| NM_172760.3 | 1,247084197 |
| NM_172761.3 | 0,865446383 |
| NM_172778.2 | 1,102115084 |
| NM_172780.3 | 1,330223144 |
| NM_172790.2 | 0,953834491 |
| NM_172793.2 | 0,828276285 |
| NM_172827.3 | 0,879783777 |
| NM_172832.4 | 1,179061423 |
| NM_172845.2 | 0,489240723 |
| NM_172854.2 | 0,726982416 |
| NM_172865.2 | 1,026062506 |
| NM_172866.3 | 0,915377114 |
| NM_172868.3 | 0,989311685 |
| NM_172871.2 | 0,918323848 |
| NM_172876.2 | 0,932246547 |
| NM_172879.3 | 0,731622729 |
| NM_172892.3 | 0,617603602 |
| NM_172893.3 | 0,912439493 |
| NM_172894.2 | 0,860373685 |
| NM_172904.2 | 0,983713968 |
| NM_172907.3 | 0,608746184 |
| NM_172916.2 | 0,812914143 |
| NM_172919.2 | 0,83804058  |
| NM_172920.4 | 0,97295733  |
| NM_172925.2 | 0,479890628 |
| NM_172928.5 | 1,053093322 |
| NM_172932.4 | 0,592364994 |
| NM_172935.4 | 0,86203785  |
| NM_172939.3 | 1,02510321  |
| NM_172943.4 | 0,950944303 |
| NM_172964.4 | 0,708623544 |
| NM_172980.2 | 1,795801244 |
| NM_173002.3 | 0,795437488 |
| NM_173006.1 | 1,073688244 |

|             |             |
|-------------|-------------|
| NM_173010.3 | 1,567762991 |
| NM_173011.2 | 1,002482576 |
| NM_173015.3 | 0,748250518 |
| NM_173027.2 | 0,647135583 |
| NM_173028.4 | 0,925347366 |
| NM_173037.1 | 0,932883763 |
| NM_173047.3 | 1,030024137 |
| NM_173180.3 | 0,895939605 |
| NM_173347.2 | 0,889913612 |
| NM_173363.5 | 0,852552106 |
| NM_173370.3 | 0,695343916 |
| NM_173371.4 | 0,249416839 |
| NM_173375.1 | 0,816273293 |
| NM_173376.3 | 0,797155781 |
| NM_173378.2 | 0,988991989 |
| NM_173379.2 | 0,766696137 |
| NM_173382.1 | 1,034681764 |
| NM_173383.2 | 0,928862712 |
| NM_173385.2 | 0,246225033 |
| NM_173391.3 | 0,323188017 |
| NM_173393.2 | 0,80580825  |
| NM_173394.3 | 0,536161369 |
| NM_173397.4 | 1,06991169  |
| NM_173398.3 | 0,840140933 |
| NM_173405.2 | 0,721286536 |
| NM_173413.3 | 0,653009833 |
| NM_173414.3 | 1,006342726 |
| NM_173416.3 | 1,247084197 |
| NM_173423.4 | 0,843587457 |
| NM_173425.3 | 0,460461857 |
| NM_173427.2 | 1,018291486 |
| NM_173429.2 | 1,242708463 |
| NM_173432.2 | 1,06680842  |
| NM_173439.2 | 0,931915994 |
| NM_173443.3 | 0,834807511 |
| NM_173449.3 | 0,153487286 |
| NM_173450.3 | 1,044007098 |
| NM_173451.3 | 0,945158549 |
| NM_173733.3 | 1,069119119 |
| NM_173740.3 | 0,749570184 |
| NM_173741.3 | 1,048093779 |
| NM_173742.3 | 0,923646876 |
| NM_173749.4 | 0,773027025 |
| NM_173752.4 | 0,563898941 |
| NM_173753.4 | 0,989018848 |
| NM_173756.4 | 1,172034445 |
| NM_173758.3 | 0,937202669 |
| NM_173761.3 | 0,948495685 |
| NM_173781.4 | 1,053873969 |
| NM_173862.2 | 0,762922097 |
| NM_173865.3 | 1,115529826 |
| NM_173866.3 | 0,841781833 |
| NM_173867.5 | 1,219371215 |
| NM_174848.3 | 0,676988564 |
| NM_174849.3 | 0,153487286 |
| NM_174851.3 | 0,997667358 |

|             |             |
|-------------|-------------|
| NM_174857.3 | 0,772004503 |
| NM_174876.3 | 1,829056822 |
| NM_174987.4 | 1,180880962 |
| NM_174989.4 | 1,030314798 |
| NM_174998.4 | 1,093802328 |
| NM_175013.2 | 0,854559335 |
| NM_175021.3 | 0,964684438 |
| NM_175022.2 | 0,933081523 |
| NM_175023.3 | 1,063088168 |
| NM_175026.3 | 0,623542099 |
| NM_175035.5 | 0,945158549 |
| NM_175036.4 | 0,881449515 |
| NM_175088.5 | 0,803131147 |
| NM_175091.3 | 0,8773328   |
| NM_175092.3 | 0,730000506 |
| NM_175093.2 | 0,726470456 |
| NM_175094.5 | 1,079088123 |
| NM_175095.4 | 0,957760663 |
| NM_175096.3 | 0,880407803 |
| NM_175101.3 | 0,959687449 |
| NM_175102.4 | 0,935158933 |
| NM_175103.3 | 0,853450096 |
| NM_175105.3 | 0,814134212 |
| NM_175106.3 | 1,069379624 |
| NM_175109.3 | 0,961147088 |
| NM_175116.4 | 1,001598621 |
| NM_175118.3 | 1,088444511 |
| NM_175121.3 | 1,496501037 |
| NM_175122.6 | 0,997667358 |
| NM_175123.4 | 1,496501037 |
| NM_175126.4 | 1,062330983 |
| NM_175127.2 | 0,947397297 |
| NM_175133.1 | 0,607275783 |
| NM_175145.3 | 0,920621336 |
| NM_175149.4 | 0,939516802 |
| NM_175150.3 | 1,048951338 |
| NM_175152.4 | 1,017620705 |
| NM_175155.4 | 0,176058945 |
| NM_175158.3 | 0,87286608  |
| NM_175163.3 | 0,97860365  |
| NM_175170.4 | 0,943739392 |
| NM_175175.4 | 0,950415975 |
| NM_175179.4 | 0,99607364  |
| NM_175194.2 | 1,752001213 |
| NM_175206.4 | 0,727113498 |
| NM_175207.4 | 0,976882621 |
| NM_175224.4 | 0,962406765 |
| NM_175226.4 | 1,065469994 |
| NM_175241.1 | 0,926405404 |
| NM_175242.1 | 0,793842844 |
| NM_175244.3 | 1,003708596 |
| NM_175245.4 | 0,92292669  |
| NM_175247.3 | 1,247084197 |
| NM_175251.4 | 0,880517024 |
| NM_175266.4 | 0,968062985 |
| NM_175271.4 | 0,897372756 |



|             |             |
|-------------|-------------|
| NM_175279.3 | 0,934523854 |
| NM_175283.3 | 0,766324202 |
| NM_175286.4 | 0,853128977 |
| NM_175290.4 | 1,227898286 |
| NM_175300.4 | 0,894083079 |
| NM_175307.6 | 0,370814416 |
| NM_175318.4 | 0,843037653 |
| NM_175324.3 | 1,034095177 |
| NM_175331.3 | 0,858490005 |
| NM_175332.3 | 0,598600415 |
| NM_175340.4 | 0,934656788 |
| NM_175349.2 | 0,821608412 |
| NM_175352.4 | 0,986947188 |
| NM_175360.2 | 0,831389465 |
| NM_175362.2 | 0,195744861 |
| NM_175364.4 | 0,996623773 |
| NM_175366.3 | 0,793227325 |
| NM_175374.3 | 0,798133886 |
| NM_175375.3 | 0,931207128 |
| NM_175380.5 | 0,997345114 |
| NM_175381.6 | 0,31505285  |
| NM_175382.4 | 1,035315182 |
| NM_175383.2 | 1,002124546 |
| NM_175386.3 | 0,784359763 |
| NM_175389.4 | 1,349785249 |
| NM_175399.4 | 1,017822254 |
| NM_175400.6 | 1,330223144 |
| NM_175402.4 | 0,964889785 |
| NM_175403.3 | 0,92384914  |
| NM_175406.3 | 0,23278905  |
| NM_175413.3 | 0,882330091 |
| NM_175423.3 | 0,793017643 |
| NM_175427.4 | 2,417424751 |
| NM_175438.4 | 1,281730893 |
| NM_175439.3 | 1,03956415  |
| NM_175440.4 | 0,931523665 |
| NM_175446.3 | 0,991858523 |
| NM_175449.4 | 0,997667358 |
| NM_175451.1 | 0,46305583  |
| NM_175456.4 | 0,27110526  |
| NM_175474.3 | 1,496501037 |
| NM_175478.2 | 1,037214532 |
| NM_175485.4 | 0,783881495 |
| NM_175486.3 | 0,818417431 |
| NM_175488.6 | 0,6301057   |
| NM_175494.4 | 0,467656574 |
| NM_175501.2 | 0,537718264 |
| NM_175507.3 | 1,073426055 |
| NM_175511.4 | 0,932246547 |
| NM_175512.2 | 0,77052425  |
| NM_175517.3 | 0,938981043 |
| NM_175520.4 | 1,023998754 |
| NM_175523.4 | 1,349202754 |
| NM_175526.3 | 0,641357587 |
| NM_175529.3 | 0,952727387 |
| NM_175531.4 | 0,855143449 |

|             |             |
|-------------|-------------|
| NM_175532.3 | 0,554259643 |
| NM_175534.3 | 0,727622058 |
| NM_175535.3 | 0,538067788 |
| NM_175537.3 | 0,427571725 |
| NM_175538.3 | 1,074986578 |
| NM_175560.3 | 1,043362046 |
| NM_175562.3 | 0,789819991 |
| NM_175563.5 | 0,424380891 |
| NM_175640.2 | 1,071568643 |
| NM_175643.3 | 0,716274    |
| NM_175645.3 | 0,493582798 |
| NM_175646.3 | 0,931929586 |
| NM_175649.5 | 1,030922936 |
| NM_175654.2 | 0,378425549 |
| NM_175656.3 | 1,02463134  |
| NM_175657.2 | 0,36278813  |
| NM_175661.2 | 0,586863152 |
| NM_175662.2 | 1,330223144 |
| NM_175664.3 | 1,197200829 |
| NM_175665.2 | 0,798133886 |
| NM_175667.4 | 0,995003359 |
| NM_175668.4 | 0,840140933 |
| NM_175692.3 | 0,931156201 |
| NM_175730.5 | 1,056440103 |
| NM_175749.2 | 0,981994845 |
| NM_175750.3 | 0,628886745 |
| NM_175770.4 | 1,034040647 |
| NM_175935.3 | 1,070753316 |
| NM_176785.3 | 1,03279649  |
| NM_176808.5 | 0,861621809 |
| NM_176828.4 | 0,902651419 |
| NM_176829.2 | 1,330223144 |
| NM_176830.2 | 0,910348241 |
| NM_176831.4 | 1,010296058 |
| NM_176834.2 | 1,70190314  |
| NM_176840.3 | 1,107788796 |
| NM_176843.3 | 1,013636759 |
| NM_176850.2 | 0,731622729 |
| NM_176902.3 | 0,849212442 |
| NM_176920.4 | 1,20604092  |
| NM_176921.3 | 0,97698401  |
| NM_176922.5 | 0,493228806 |
| NM_176928.1 | 1,081504951 |
| NM_176933.4 | 0,958203763 |
| NM_176958.3 | 1,006745598 |
| NM_176959.3 | 1,266270108 |
| NM_176963.4 | 1,037756917 |
| NM_176996.4 | 1,327604594 |
| NM_177001.3 | 0,896495457 |
| NM_177041.3 | 0,988846927 |
| NM_177047.3 | 0,626241415 |
| NM_177056.4 | 1,119830708 |
| NM_177074.2 | 1,304641929 |
| NM_177093.3 | 0,953278406 |
| NM_177130.3 | 1,078124403 |
| NM_177140.3 | 1,07643057  |

|             |             |
|-------------|-------------|
| NM_177152.5 | 1,039469063 |
| NM_177155.4 | 0,498833679 |
| NM_177157.4 | 0,911661551 |
| NM_177167.4 | 1,057527399 |
| NM_177182.4 | 0,665111572 |
| NM_177185.4 | 0,991056641 |
| NM_177200.4 | 1,118596734 |
| NM_177229.3 | 0,772759687 |
| NM_177240.3 | 0,935903251 |
| NM_177242.4 | 1,065463541 |
| NM_177244.3 | 1,016371533 |
| NM_177253.4 | 0,844180072 |
| NM_177260.2 | 0,530868869 |
| NM_177263.3 | 1,181935131 |
| NM_177271.3 | 1,067272057 |
| NM_177275.4 | 1,114061883 |
| NM_177282.5 | 0,874103052 |
| NM_177290.3 | 1,829056822 |
| NM_177305.4 | 0,643272087 |
| NM_177312.4 | 0,932933216 |
| NM_177319.3 | 0,942241393 |
| NM_177325.3 | 0,946447828 |
| NM_177326.3 | 1,396734301 |
| NM_177342.3 | 1,028130483 |
| NM_177344.3 | 0,904454641 |
| NM_177350.5 | 0,991631341 |
| NM_177351.4 | 0,714746764 |
| NM_177354.4 | 0,470238118 |
| NM_177358.4 | 0,997667358 |
| NM_177359.5 | 0,976882621 |
| NM_177366.3 | 1,031296594 |
| NM_177367.3 | 0,931002949 |
| NM_177374.4 | 0,613949143 |
| NM_177387.3 | 0,908589915 |
| NM_177389.3 | 0,835251665 |
| NM_177409.3 | 0,60153473  |
| NM_177429.3 | 1,396734301 |
| NM_177445.5 | 0,992365988 |
| NM_177464.4 | 0,790727622 |
| NM_177470.3 | 1,034913869 |
| NM_177473.3 | 1,057229588 |
| NM_177565.3 | 0,912439493 |
| NM_177572.4 | 1,293272501 |
| NM_177582.3 | 1,140191266 |
| NM_177586.5 | 0,617031217 |
| NM_177596.3 | 0,798133886 |
| NM_177600.4 | 1,07249241  |
| NM_177601.3 | 0,987155537 |
| NM_177603.3 | 0,95899808  |
| NM_177625.4 | 0,80457045  |
| NM_177630.3 | 0,644063737 |
| NM_177632.3 | 0,752370016 |
| NM_177647.4 | 1,051522546 |
| NM_177648.3 | 1,100582781 |
| NM_177660.3 | 1,027155063 |
| NM_177662.3 | 0,897499952 |

|             |             |
|-------------|-------------|
| NM_177663.4 | 0,798654182 |
| NM_177664.5 | 1,321652118 |
| NM_177667.4 | 0,522587664 |
| NM_177670.4 | 0,977247266 |
| NM_177682.3 | 0,798133886 |
| NM_177683.2 | 1,162675954 |
| NM_177688.4 | 0,86638215  |
| NM_177699.4 | 0,817882297 |
| NM_177708.5 | 0,509013958 |
| NM_177709.3 | 0,811898495 |
| NM_177715.4 | 0,94002016  |
| NM_177721.4 | 1,044301617 |
| NM_177725.4 | 0,878453669 |
| NM_177730.3 | 0,87684673  |
| NM_177733.7 | 0,638507109 |
| NM_177755.3 | 0,609685607 |
| NM_177764.4 | 0,405302364 |
| NM_177776.3 | 1,648319982 |
| NM_177782.3 | 0,742097921 |
| NM_177798.3 | 0,927863882 |
| NM_177846.3 | 1,178791491 |
| NM_177869.4 | 1,028062241 |
| NM_177876.4 | 1,016074505 |
| NM_177878.3 | 0,968749463 |
| NM_177897.3 | 1,496501037 |
| NM_177899.3 | 1,053043702 |
| NM_177900.4 | 0,933577378 |
| NM_177909.5 | 0,694529968 |
| NM_177993.3 | 1,102684974 |
| NM_178020.3 | 1,190130746 |
| NM_178027.4 | 0,926251601 |
| NM_178051.4 | 1,054676921 |
| NM_178060.4 | 1,137340788 |
| NM_178061.5 | 0,911661551 |
| NM_178070.4 | 0,733110199 |
| NM_178079.3 | 1,10462615  |
| NM_178086.3 | 0,623542099 |
| NM_178098.2 | 0,959295536 |
| NM_178182.2 | 0,886815429 |
| NM_178187.4 | 0,60572661  |
| NM_178188.4 | 0,332555786 |
| NM_178189.5 | 0,60572661  |
| NM_178193.2 | 0,748250518 |
| NM_178194.4 | 0,598600415 |
| NM_178196.4 | 0,997667358 |
| NM_178197.2 | 1,068929312 |
| NM_178198.2 | 0,51231567  |
| NM_178201.2 | 0,399066943 |
| NM_178204.2 | 0,570095633 |
| NM_178205.2 | 0,769035255 |
| NM_178207.2 | 1,396734301 |
| NM_178208.2 | 0,858457959 |
| NM_178210.2 | 0,577596891 |
| NM_178211.2 | 0,391940748 |
| NM_178212.3 | 0,902651419 |
| NM_178214.4 | 1,119550668 |

|             |             |
|-------------|-------------|
| NM_178215.2 | 0,332555786 |
| NM_178216.3 | 0,867536833 |
| NM_178242.2 | 1,396734301 |
| NM_178246.3 | 0,914528411 |
| NM_178258.5 | 1,995334715 |
| NM_178263.3 | 1,184729987 |
| NM_178347.4 | 0,929891043 |
| NM_178357.3 | 0,93698517  |
| NM_178375.2 | 1,130870901 |
| NM_178376.3 | 0,957462234 |
| NM_178379.3 | 1,025535161 |
| NM_178385.3 | 0,926085843 |
| NM_178386.3 | 4,703288972 |
| NM_178397.3 | 0,860898931 |
| NM_178399.4 | 0,798133886 |
| NM_178404.3 | 1,038035401 |
| NM_178405.3 | 1,142616367 |
| NM_178417.3 | 1,213379219 |
| NM_178418.4 | 0,884529822 |
| NM_178421.3 | 1,039236831 |
| NM_178589.3 | 0,916390995 |
| NM_178598.2 | 0,561003199 |
| NM_178600.2 | 0,894286494 |
| NM_178601.3 | 1,045915859 |
| NM_178602.3 | 0,741283567 |
| NM_178603.4 | 1,006610156 |
| NM_178605.4 | 0,914193174 |
| NM_178607.4 | 0,952942282 |
| NM_178608.4 | 0,861104525 |
| NM_178610.4 | 0,957398241 |
| NM_178612.4 | 0,710756484 |
| NM_178613.3 | 0,899008023 |
| NM_178614.4 | 1,097706748 |
| NM_178615.3 | 1,140191266 |
| NM_178619.4 | 1,051558293 |
| NM_178620.3 | 0,589530711 |
| NM_178624.6 | 1,995334715 |
| NM_178627.3 | 1,396734301 |
| NM_178628.5 | 0,997667358 |
| NM_178641.5 | 0,703273711 |
| NM_178643.5 | 0,781002224 |
| NM_178644.3 | 0,943988516 |
| NM_178645.4 | 1,054047676 |
| NM_178646.4 | 1,12372641  |
| NM_178648.2 | 0,726562097 |
| NM_178654.4 | 0,954238642 |
| NM_178668.3 | 0,955613218 |
| NM_178672.7 | 0,535333704 |
| NM_178675.4 | 0,960716715 |
| NM_178679.2 | 0,288215014 |
| NM_178680.4 | 0,866601254 |
| NM_178684.5 | 0,933677032 |
| NM_178685.5 | 0,544182195 |
| NM_178686.3 | 3,242418912 |
| NM_178691.4 | 0,779689616 |
| NM_178692.3 | 0,845334375 |

|             |             |
|-------------|-------------|
| NM_178693.4 | 0,910913674 |
| NM_178695.5 | 0,970944125 |
| NM_178699.4 | 1,289890291 |
| NM_178700.5 | 0,972409956 |
| NM_178703.4 | 0,7759635   |
| NM_178707.4 | 1,019610188 |
| NM_178708.3 | 0,984124362 |
| NM_178713.4 | 0,694029466 |
| NM_178715.3 | 0,702062215 |
| NM_178726.3 | 1,080119205 |
| NM_178749.3 | 0,665111572 |
| NM_178752.3 | 1,030437453 |
| NM_178753.4 | 0,748250518 |
| NM_178757.3 | 0,877673002 |
| NM_178764.3 | 0,778880656 |
| NM_178767.5 | 1,048425872 |
| NM_178778.3 | 0,995197884 |
| NM_178789.4 | 1,496501037 |
| NM_178791.4 | 0,937506512 |
| NM_178794.4 | 0,645549467 |
| NM_178802.4 | 0,759167754 |
| NM_178848.3 | 0,7759635   |
| NM_178856.1 | 0,598600415 |
| NM_178870.5 | 0,613949143 |
| NM_178873.3 | 1,061535687 |
| NM_178878.2 | 0,965414215 |
| NM_178890.3 | 0,976355371 |
| NM_178891.5 | 0,760127511 |
| NM_178892.5 | 1,029761436 |
| NM_178898.4 | 0,966811666 |
| NM_178900.4 | 1,219371215 |
| NM_178908.3 | 0,517309    |
| NM_178909.4 | 0,879265143 |
| NM_178911.4 | 0,57419704  |
| NM_178915.3 | 0,930122731 |
| NM_178916.5 | 0,765333863 |
| NM_178918.3 | 0,965903708 |
| NM_178919.4 | 0,808014937 |
| NM_178920.4 | 0,957320516 |
| NM_178922.3 | 0,920178631 |
| NM_178928.4 | 0,84626094  |
| NM_178933.2 | 0,889811427 |
| NM_178934.4 | 1,45115252  |
| NM_178939.2 | 0,986514819 |
| NM_180678.3 | 0,954670401 |
| NM_181040.4 | 1,087218617 |
| NM_181072.3 | 0,584000404 |
| NM_181075.3 | 0,598600415 |
| NM_181278.2 | 0,918026166 |
| NM_181315.4 | 0,883427691 |
| NM_181328.3 | 1,12639863  |
| NM_181344.5 | 1,012658966 |
| NM_181390.3 | 0,819580862 |
| NM_181392.3 | 0,889225254 |
| NM_181397.2 | 0,691121522 |
| NM_181401.3 | 0,94868369  |

|             |             |
|-------------|-------------|
| NM_181410.3 | 1,061382573 |
| NM_181416.3 | 0,381989754 |
| NM_181417.3 | 0,751407693 |
| NM_181418.3 | 1,151593179 |
| NM_181529.4 | 1,404124429 |
| NM_181547.3 | 0,778180539 |
| NM_181584.4 | 0,752626252 |
| NM_181586.3 | 0,623542099 |
| NM_181590.5 | 1,396734301 |
| NM_181593.2 | 0,956270372 |
| NM_181596.4 | 0,399066943 |
| NM_181729.2 | 0,855143449 |
| NM_181730.4 | 1,028270651 |
| NM_181732.4 | 0,791325878 |
| NM_181748.2 | 1,107871976 |
| NM_181752.1 | 1,214438014 |
| NM_181796.2 | 0,655743803 |
| NM_181820.2 | 0,755924883 |
| NM_181821.1 | 1,053388974 |
| NM_181849.3 | 0,906970325 |
| NM_181859.3 | 0,18706263  |
| NM_182783.2 | 0,72557626  |
| NM_182805.3 | 1,127341284 |
| NM_182806.1 | 0,153487286 |
| NM_182809.2 | 0,573658731 |
| NM_182939.4 | 0,840140933 |
| NM_182992.2 | 0,357453011 |
| NM_182994.2 | 0,980466196 |
| NM_183017.2 | 0,862171012 |
| NM_183019.2 | 0,812386277 |
| NM_183024.1 | 1,14089683  |
| NM_183025.2 | 1,013503347 |
| NM_183027.2 | 0,997667358 |
| NM_183029.2 | 0,749113552 |
| NM_183031.2 | 0,519194237 |
| NM_183034.1 | 0,938402204 |
| NM_183091.3 | 1,122375777 |
| NM_183112.3 | 0,964411779 |
| NM_183135.1 | 0,72557626  |
| NM_183140.3 | 1,049270842 |
| NM_183147.2 | 0,320678794 |
| NM_183150.2 | 1,02223726  |
| NM_183160.3 | 0,380063755 |
| NM_183170.2 | 1,043930159 |
| NM_183173.2 | 1,596267772 |
| NM_183175.4 | 0,757488179 |
| NM_183179.1 | 1,632546585 |
| NM_183180.2 | 1,063501803 |
| NM_183181.2 | 0,967435014 |
| NM_183185.3 | 0,581972625 |
| NM_183195.2 | 1,143618384 |
| NM_183216.3 | 4,323225217 |
| NM_183249.2 | 0,69457854  |
| NM_183250.2 | 0,899899433 |
| NM_183256.3 | 1,073952556 |
| NM_183261.3 | 0,920923715 |

|             |             |
|-------------|-------------|
| NM_183262.3 | 0,708623544 |
| NM_183276.2 | 0,987349755 |
| NM_183282.2 | 0,581972625 |
| NM_183283.2 | 0,609685607 |
| NM_183315.2 | 1,183279889 |
| NM_183316.2 | 1,045037223 |
| NM_183319.2 | 1,448993067 |
| NM_183358.4 | 1,067441588 |
| NM_183390.3 | 0,997667358 |
| NM_184053.3 | 0,302323442 |
| NM_194061.2 | 0,816273293 |
| NM_194335.2 | 0,745039143 |
| NM_194344.2 | 0,332555786 |
| NM_194345.1 | 1,995334715 |
| NM_194350.1 | 0,767436429 |
| NM_197940.2 | 2,993002073 |
| NM_197980.1 | 0,911529957 |
| NM_197985.3 | 1,018237819 |
| NM_197986.2 | 0,694029466 |
| NM_197988.1 | 0,498833679 |
| NM_197989.1 | 1,174714544 |
| NM_197990.3 | 0,756256491 |
| NM_197992.1 | 0,990437884 |
| NM_197993.2 | 1,044748289 |
| NM_197995.2 | 0,997667358 |
| NM_197996.2 | 1,010124044 |
| NM_198001.2 | 0,887216073 |
| NM_198004.3 | 0,845082938 |
| NM_198006.4 | 0,921022803 |
| NM_198017.3 | 0,94424388  |
| NM_198024.2 | 1,995334715 |
| NM_198027.2 | 0,980034167 |
| NM_198035.1 | 1,065207701 |
| NM_198037.1 | 0,715222718 |
| NM_198095.2 | 0,838916448 |
| NM_198100.2 | 0,798133886 |
| NM_198103.2 | 1,015836796 |
| NM_198105.2 | 0,817147247 |
| NM_198108.2 | 1,255129902 |
| NM_198113.2 | 0,958285751 |
| NM_198119.2 | 0,766914363 |
| NM_198163.1 | 0,959597677 |
| NM_198168.3 | 0,92977211  |
| NM_198170.4 | 0,985350477 |
| NM_198250.1 | 0,665111572 |
| NM_198292.3 | 0,945158549 |
| NM_198295.2 | 0,832054576 |
| NM_198303.2 | 0,921017156 |
| NM_198305.2 | 1,018350042 |
| NM_198322.3 | 1,084421041 |
| NM_198326.3 | 0,929644583 |
| NM_198409.3 | 0,682614508 |
| NM_198414.2 | 1,074959292 |
| NM_198415.2 | 0,364227766 |
| NM_198421.1 | 0,931357141 |
| NM_198424.3 | 1,128674182 |



|             |             |
|-------------|-------------|
| NM_198425.2 | 1,220496615 |
| NM_198606.2 | 0,905314838 |
| NM_198607.1 | 0,778743486 |
| NM_198609.2 | 0,963775014 |
| NM_198610.2 | 1,047729519 |
| NM_198617.2 | 0,580461008 |
| NM_198621.2 | 0,665111572 |
| NM_198622.1 | 0,932127166 |
| NM_198626.2 | 0,881272833 |
| NM_198630.2 | 0,928062658 |
| NM_198636.3 | 1,995334715 |
| NM_198652.2 | 0,443407715 |
| NM_198653.2 | 1,01767563  |
| NM_198657.2 | 0,984710639 |
| NM_198675.2 | 1,067728268 |
| NM_198858.1 | 0,877947275 |
| NM_198861.1 | 0,480358357 |
| NM_198886.3 | 0,306974572 |
| NM_198899.2 | 0,821608412 |
| NM_198931.3 | 0,812386277 |
| NM_198937.2 | 0,534253822 |
| NM_198967.5 | 0,94976611  |
| NM_199008.2 | 1,023404873 |
| NM_199015.4 | 0,69097034  |
| NM_199017.2 | 1,662778929 |
| NM_199025.2 | 0,99467136  |
| NM_199028.2 | 0,906970325 |
| NM_199035.2 | 1,473826778 |
| NM_199042.2 | 1,522755441 |
| NM_199068.2 | 0,850470534 |
| NM_199143.2 | 0,939765453 |
| NM_199149.3 | 1,146938453 |
| NM_199152.3 | 0,496137281 |
| NM_199195.1 | 0,620171601 |
| NM_199197.1 | 1,126709275 |
| NM_199199.3 | 1,036682282 |
| NM_199251.1 | 0,997667358 |
| NM_199301.2 | 3,192535545 |
| NM_199310.2 | 1,291098933 |
| NM_199311.2 | 0,463531603 |
| NM_199447.2 | 0,983277925 |
| NM_199449.2 | 0,453485163 |
| NM_199468.1 | 0,645549467 |
| NM_199470.2 | 1,130689672 |
| NM_201226.1 | 1,062510048 |
| NM_201232.2 | 0,938105127 |
| NM_201244.1 | 0,748250518 |
| NM_201256.4 | 1,039007165 |
| NM_201355.3 | 0,7759635   |
| NM_201358.2 | 1,208760703 |
| NM_201368.1 | 1,104017685 |
| NM_201369.3 | 1,125573429 |
| NM_201373.4 | 0,898913482 |
| NM_201375.2 | 1,136876756 |
| NM_201407.4 | 0,598600415 |
| NM_201410.3 | 0,603240728 |

|             |             |
|-------------|-------------|
| NM_201609.2 | 0,743690154 |
| NM_201610.2 | 0,737406308 |
| NM_201638.2 | 0,996386655 |
| NM_201639.2 | 0,546667045 |
| NM_201642.4 | 0,249416839 |
| NM_201645.2 | 0,332555786 |
| NM_203507.3 | 1,003717493 |
| NM_205810.4 | 0,817532974 |
| NM_205819.3 | 0,090697033 |
| NM_205820.1 | 0,404330416 |
| NM_206534.1 | 1,061328903 |
| NM_206924.2 | 1,067472343 |
| NM_206973.2 | 1,09178692  |
| NM_207105.3 | 0,676089141 |
| NM_207161.3 | 0,816273293 |
| NM_207176.3 | 0,612945958 |
| NM_207202.2 | 0,672112746 |
| NM_207206.2 | 0,784775997 |
| NM_207207.1 | 1,067563418 |
| NM_207223.1 | 0,767436429 |
| NM_207237.3 | 0,703711797 |
| NM_207239.1 | 0,987934018 |
| NM_207242.2 | 0,498833679 |
| NM_207255.2 | 0,956097884 |
| NM_207268.3 | 1,781548853 |
| NM_207281.3 | 2,194868187 |
| NM_207523.2 | 0,927824434 |
| NM_207525.3 | 0,973542404 |
| NM_207533.2 | 0,498833679 |
| NM_207541.1 | 1,115447532 |
| NM_207633.2 | 1,221633499 |
| NM_207648.1 | 1,312787354 |
| NM_207655.2 | 0,861890143 |
| NM_207671.4 | 1,022119989 |
| NM_211358.2 | 0,932883763 |
| NM_212433.1 | 1,035070625 |
| NM_212445.2 | 0,696878095 |
| NM_212473.1 | 0,855143449 |
| NM_213614.2 | 0,498833679 |
| NP_904328.1 | 1,098454832 |
| NP_904329.1 | 1,069380637 |
| NP_904330.1 | 1,053238151 |
| NP_904331.1 | 1,112351678 |
| NP_904332.1 | 0,909905748 |
| NP_904333.1 | 1,007858583 |
| NP_904334.1 | 0,980092029 |
| NP_904335.1 | 1,023669237 |
| NP_904336.1 | 1,015482846 |
| NP_904337.1 | 1,060637994 |
| NP_904338.1 | 1,013607193 |
| NP_904339.1 | 0,986256412 |
| NP_904340.1 | 1,068072285 |
| NR_001460.1 | 0,142523908 |
| NR_001461.5 | 0,885132211 |
| NR_002142.2 | 0,544182195 |
| NR_002321.2 | 0,911661551 |

|             |             |
|-------------|-------------|
| NR_002322.2 | 0,81884019  |
| NR_002445.2 | 1,134190259 |
| NR_002452.2 | 0,354010998 |
| NR_002688.1 | 0,973334007 |
| NR_002700.1 | 0,665111572 |
| NR_002840.2 | 0,914063948 |
| NR_002847.2 | 0,853455761 |
| NR_002858.1 | 0,230230929 |
| NR_002862.3 | 1,151154643 |
| NR_002864.1 | 0,990591703 |
| NR_002870.2 | 0,554259643 |
| NR_002875.2 | 0,863202509 |
| NR_002885.3 | 0,498833679 |
| NR_002888.2 | 0,436479469 |
| NR_002890.1 | 0,855143449 |
| NR_002891.1 | 0,607275783 |
| NR_002896.3 | 0,968568726 |
| NR_002898.2 | 0,674099566 |
| NR_002899.1 | 1,247084197 |
| NR_002900.1 | 0,816273293 |
| NR_002928.2 | 0,997667358 |
| NR_003145.3 | 2,494168394 |
| NR_003270.2 | 1,134550478 |
| NR_003292.1 | 0,976326879 |
| NR_003293.3 | 1,086348901 |
| NR_003363.1 | 0,843706346 |
| NR_003364.1 | 1,795801244 |
| NR_003372.1 | 1,097434093 |
| NR_003373.1 | 0,748250518 |
| NR_003507.1 | 0,78793047  |
| NR_003508.1 | 0,766628601 |
| NR_003517.1 | 0,87392567  |
| NR_003518.2 | 0,915298462 |
| NR_003519.3 | 0,940657794 |
| NR_003520.1 | 0,733578939 |
| NR_003522.1 | 1,627773057 |
| NR_003546.1 | 0,665111572 |
| NR_003552.1 | 0,498833679 |
| NR_003555.1 | 1,14295872  |
| NR_003568.1 | 0,675291851 |
| NR_003619.2 | 1,192863145 |
| NR_003623.1 | 1,144955296 |
| NR_003630.2 | 1,08836439  |
| NR_003632.2 | 0,904861092 |
| NR_003633.3 | 0,656293805 |
| NR_003634.2 | 0,966603506 |
| NR_003643.1 | 0,861621809 |
| NR_003946.2 | 0,762037379 |
| NR_003966.1 | 0,991462959 |
| NR_004052.1 | 0,926405404 |
| NR_004417.1 | 1,330223144 |
| NR_004418.1 | 1,157294135 |
| NR_004438.1 | 1,316071834 |
| NR_004442.1 | 0,931156201 |
| NR_004445.1 | 0,997667358 |
| NR_004446.1 | 0,905810517 |

|             |             |
|-------------|-------------|
| NR_004853.1 | 0,272091098 |
| NR_004857.1 | 0,609685607 |
| NR_015349.2 | 1,011719011 |
| NR_015455.2 | 0,453485163 |
| NR_015456.1 | 0,91677541  |
| NR_015457.1 | 0,995982109 |
| NR_015458.1 | 1,662778929 |
| NR_015459.1 | 1,182600819 |
| NR_015464.1 | 0,904136043 |
| NR_015465.2 | 0,511000354 |
| NR_015467.1 | 0,80457045  |
| NR_015470.1 | 0,936272443 |
| NR_015471.1 | 0,781192365 |
| NR_015472.1 | 0,841220805 |
| NR_015474.1 | 0,469490521 |
| NR_015475.1 | 1,28865367  |
| NR_015476.1 | 0,920973711 |
| NR_015477.1 | 0,306974572 |
| NR_015478.2 | 1,030922936 |
| NR_015479.1 | 0,939738285 |
| NR_015486.2 | 0,989456104 |
| NR_015491.1 | 0,880294727 |
| NR_015492.1 | 1,079828199 |
| NR_015493.2 | 0,618806336 |
| NR_015495.2 | 1,046848143 |
| NR_015498.2 | 1,023921762 |
| NR_015499.2 | 0,399066943 |
| NR_015502.1 | 0,681739361 |
| NR_015503.1 | 1,081084361 |
| NR_015505.2 | 1,121576933 |
| NR_015506.2 | 1,154443657 |
| NR_015507.2 | 0,997667358 |
| NR_015508.3 | 1,149211766 |
| NR_015510.1 | 0,997667358 |
| NR_015511.2 | 0,783881495 |
| NR_015514.2 | 0,906970325 |
| NR_015515.2 | 0,997667358 |
| NR_015519.1 | 0,491217897 |
| NR_015521.1 | 0,997667358 |
| NR_015523.2 | 0,937657291 |
| NR_015524.1 | 0,938865745 |
| NR_015525.1 | 1,795801244 |
| NR_015526.2 | 0,798133886 |
| NR_015528.1 | 1,029940704 |
| NR_015530.2 | 0,997667358 |
| NR_015531.1 | 0,920923715 |
| NR_015537.2 | 0,989811709 |
| NR_015538.1 | 1,918591072 |
| NR_015542.1 | 0,843841994 |
| NR_015543.2 | 1,084963251 |
| NR_015545.2 | 0,865446383 |
| NR_015548.1 | 0,206413936 |
| NR_015551.1 | 0,962089324 |
| NR_015555.1 | 0,997667358 |
| NR_015556.1 | 1,350688115 |
| NR_015558.3 | 0,478880332 |

|             |             |
|-------------|-------------|
| NR_015565.2 | 1,034383542 |
| NR_015566.2 | 0,962749    |
| NR_015567.2 | 0,798133886 |
| NR_015569.3 | 1,036039179 |
| NR_015572.2 | 0,99128569  |
| NR_015573.2 | 1,058749033 |
| NR_015574.2 | 0,369506429 |
| NR_015577.1 | 1,11919069  |
| NR_015579.1 | 0,997667358 |
| NR_015583.1 | 0,997667358 |
| NR_015585.3 | 0,525088083 |
| NR_015586.2 | 0,862269645 |
| NR_015587.2 | 0,831389465 |
| NR_015600.2 | 0,798133886 |
| NR_015601.1 | 1,035346779 |
| NR_015602.2 | 0,589530711 |
| NR_015603.1 | 0,798133886 |
| NR_015604.2 | 1,353977128 |
| NR_015605.1 | 1,080806304 |
| NR_015606.3 | 1,130689672 |
| NR_015618.2 | 1,007260313 |
| NR_023357.1 | 1,463245458 |
| NR_024067.2 | 1,077480746 |
| NR_024068.2 | 0,90998175  |
| NR_024078.1 | 0,721716812 |
| NR_024085.1 | 1,829056822 |
| NR_024097.1 | 1,172696719 |
| NR_024139.2 | 0,821312017 |
| NR_024201.3 | 0,665111572 |
| NR_024257.1 | 0,352117891 |
| NR_024323.1 | 0,748250518 |
| NR_024325.1 | 0,477145258 |
| NR_024328.1 | 0,982318629 |
| NR_024329.1 | 0,997667358 |
| NR_024331.1 | 0,938058302 |
| NR_024619.1 | 0,855854292 |
| NR_024720.1 | 0,498833679 |
| NR_026596.1 | 0,731622729 |
| NR_026688.1 | 1,051804346 |
| NR_026741.1 | 1,013503347 |
| NR_026798.1 | 1,214551566 |
| NR_026848.1 | 1,131500784 |
| NR_026853.1 | 0,945158549 |
| NR_026944.1 | 1,116034671 |
| NR_026990.1 | 0,554259643 |
| NR_027059.1 | 0,925652636 |
| NR_027137.1 | 0,544182195 |
| NR_027236.1 | 1,465245793 |
| NR_027290.1 | 1,127797883 |
| NR_027298.1 | 1,343013751 |
| NR_027316.1 | 0,864645043 |
| NR_027377.1 | 1,289293201 |
| NR_027380.1 | 0,678413803 |
| NR_027388.1 | 0,982524192 |
| NR_027448.1 | 1,036791568 |
| NR_027452.1 | 0,844180072 |

|             |             |
|-------------|-------------|
| NR_027637.1 | 0,453485163 |
| NR_027643.2 | 0,733578939 |
| NR_027652.1 | 0,767436429 |
| NR_027656.1 | 0,783881495 |
| NR_027772.1 | 1,029850176 |
| NR_027773.1 | 1,341690584 |
| NR_027800.1 | 0,957760663 |
| NR_027801.1 | 0,748250518 |
| NR_027810.1 | 0,649275582 |
| NR_027817.1 | 1,043015874 |
| NR_027818.1 | 0,997667358 |
| NR_027821.1 | 0,637852901 |
| NR_027827.1 | 0,689110443 |
| NR_027829.1 | 0,575125889 |
| NR_027831.1 | 0,899957668 |
| NR_027838.1 | 1,060567576 |
| NR_027851.1 | 1,229883036 |
| NR_027854.1 | 0,834062743 |
| NR_027860.1 | 6,983671504 |
| NR_027872.1 | 1,548104521 |
| NR_027874.1 | 0,962247215 |
| NR_027875.1 | 3,192535545 |
| NR_027879.1 | 0,864645043 |
| NR_027886.1 | 0,870145966 |
| NR_027890.1 | 1,125029148 |
| NR_027893.1 | 1,202317072 |
| NR_027894.1 | 0,80457045  |
| NR_027895.1 | 1,572081897 |
| NR_027897.1 | 1,032150143 |
| NR_027905.1 | 1,045428029 |
| NR_027913.1 | 1,153552882 |
| NR_027915.1 | 0,872958938 |
| NR_027919.1 | 1,042149342 |
| NR_027923.1 | 1,048975965 |
| NR_027930.1 | 1,344682091 |
| NR_027955.1 | 1,330223144 |
| NR_027956.1 | 0,948486572 |
| NR_027957.1 | 0,891058565 |
| NR_027958.1 | 1,140191266 |
| NR_027963.1 | 1,007223558 |
| NR_027966.1 | 1,140191266 |
| NR_027969.1 | 0,613949143 |
| NR_027974.1 | 0,51308607  |
| NR_027980.1 | 0,812386277 |
| NR_027984.1 | 0,909176119 |
| NR_027985.1 | 1,057343779 |
| NR_027987.1 | 1,496501037 |
| NR_028021.1 | 1,045632134 |
| NR_028042.1 | 0,840140933 |
| NR_028053.1 | 0,897900622 |
| NR_028061.1 | 0,964411779 |
| NR_028079.1 | 1,995334715 |
| NR_028086.1 | 1,144383146 |
| NR_028091.1 | 1,08836439  |
| NR_028101.1 | 0,821608412 |
| NR_028108.1 | 3,990669431 |

|             |             |
|-------------|-------------|
| NR_028114.1 | 3,135525981 |
| NR_028122.1 | 1,496501037 |
| NR_028124.1 | 0,938981043 |
| NR_028125.1 | 1,567762991 |
| NR_028129.1 | 1,155193783 |
| NR_028142.1 | 1,401485098 |
| NR_028261.1 | 0,552438667 |
| NR_028264.1 | 1,007377016 |
| NR_028265.1 | 0,592364994 |
| NR_028266.1 | 0,997667358 |
| NR_028273.1 | 1,151154643 |
| NR_028298.1 | 1,02563934  |
| NR_028299.1 | 1,282715174 |
| NR_028300.1 | 1,01402256  |
| NR_028304.1 | 0,872958938 |
| NR_028305.2 | 0,631855993 |
| NR_028307.1 | 2,59393513  |
| NR_028313.1 | 0,563898941 |
| NR_028329.1 | 1,108519286 |
| NR_028359.1 | 0,86630496  |
| NR_028360.1 | 1,349785249 |
| NR_028363.1 | 1,369347354 |
| NR_028364.1 | 1,08836439  |
| NR_028368.1 | 0,891854153 |
| NR_028376.1 | 0,814188303 |
| NR_028378.1 | 0,831389465 |
| NR_028380.1 | 1,199323526 |
| NR_028381.1 | 2,520422798 |
| NR_028382.1 | 1,81394065  |
| NR_028384.1 | 1,108519286 |
| NR_028385.1 | 0,469490521 |
| NR_028420.1 | 0,665111572 |
| NR_028421.1 | 1,338974612 |
| NR_028427.1 | 0,910913674 |
| NR_028428.1 | 0,908848111 |
| NR_028429.1 | 0,969651738 |
| NR_028434.1 | 0,824994161 |
| NR_028442.1 | 1,235207205 |
| NR_028481.1 | 0,897900622 |
| NR_028512.1 | 0,960716715 |
| NR_028513.1 | 0,816273293 |
| NR_028520.1 | 0,565344836 |
| NR_028523.1 | 0,498833679 |
| NR_028537.1 | 1,852810807 |
| NR_028538.1 | 0,760127511 |
| NR_028542.1 | 0,166277893 |
| NR_028546.1 | 0,443407715 |
| NR_028551.1 | 0,931156201 |
| NR_028555.2 | 0,685896308 |
| NR_028558.1 | 2,194868187 |
| NR_028560.1 | 1,205514724 |
| NR_028563.1 | 0,986066574 |
| NR_028564.1 | 0,460461857 |
| NR_028571.1 | 0,834412699 |
| NR_028572.1 | 1,216667509 |
| NR_028574.1 | 0,950845424 |

|             |             |
|-------------|-------------|
| NR_028578.1 | 2,82672418  |
| NR_028589.1 | 0,7759635   |
| NR_028590.1 | 1,995334715 |
| NR_028592.1 | 0,7759635   |
| NR_029382.1 | 0,902082461 |
| NR_029412.1 | 0,836753268 |
| NR_029432.1 | 1,326167585 |
| NR_029436.1 | 1,496501037 |
| NR_029437.1 | 0,562786715 |
| NR_029438.1 | 1,112153776 |
| NR_029440.1 | 0,999128071 |
| NR_029441.1 | 1,074411001 |
| NR_029443.1 | 0,861621809 |
| NR_029444.1 | 1,227898286 |
| NR_029446.1 | 0,673425466 |
| NR_029447.1 | 0,949393131 |
| NR_029450.1 | 0,874877529 |
| NR_029452.1 | 0,930028893 |
| NR_029456.1 | 1,070667408 |
| NR_029457.1 | 0,945158549 |
| NR_029459.1 | 1,062032994 |
| NR_029460.1 | 0,988035814 |
| NR_029463.1 | 1,385649108 |
| NR_029464.1 | 0,688046454 |
| NR_029468.1 | 1,147487712 |
| NR_029470.1 | 0,645549467 |
| NR_029471.2 | 0,7759635   |
| NR_029473.1 | 0,598600415 |
| NR_029474.1 | 0,469490521 |
| NR_029475.1 | 0,952318841 |
| NR_029527.1 | 1,829056822 |
| NR_029535.1 | 0,997667358 |
| NR_029557.1 | 2,369459974 |
| NR_029572.1 | 0,997667358 |
| NR_029580.1 | 1,425239082 |
| NR_029585.1 | 2,280382532 |
| NR_029656.1 | 0,586863152 |
| NR_029734.1 | 0,920923715 |
| NR_029741.1 | 0,938981043 |
| NR_029758.1 | 1,41336209  |
| NR_029768.1 | 1,551927001 |
| NR_029773.1 | 0,399066943 |
| NR_029784.1 | 1,060021568 |
| NR_029825.1 | 1,867428644 |
| NR_029855.1 | 0,882551893 |
| NR_029879.1 | 0,879930216 |
| NR_029959.1 | 1,567762991 |
| NR_030451.1 | 1,068929312 |
| NR_030479.1 | 1,567762991 |
| NR_030484.1 | 0,816273293 |
| NR_030669.1 | 0,8953425   |
| NR_030670.1 | 0,958389115 |
| NR_030671.1 | 1,160854583 |
| NR_030673.1 | 1,037574052 |
| NR_030675.1 | 0,785397707 |
| NR_030676.1 | 0,897900622 |



|             |             |
|-------------|-------------|
| NR_030677.1 | 1,00578948  |
| NR_030682.1 | 0,908133108 |
| NR_030683.1 | 0,665111572 |
| NR_030687.1 | 0,412369175 |
| NR_030688.1 | 1,122375777 |
| NR_030689.1 | 0,609685607 |
| NR_030690.1 | 1,029643876 |
| NR_030693.1 | 0,996193698 |
| NR_030694.1 | 0,990051576 |
| NR_030695.1 | 1,100117306 |
| NR_030696.1 | 1,053093322 |
| NR_030698.1 | 1,197200829 |
| NR_030699.1 | 1,005225444 |
| NR_030700.1 | 1,040968892 |
| NR_030701.1 | 0,313552598 |
| NR_030702.1 | 0,967886243 |
| NR_030704.1 | 0,554259643 |
| NR_030708.1 | 0,966392519 |
| NR_030709.2 | 1,092683297 |
| NR_030711.1 | 1,08377693  |
| NR_030718.1 | 0,430366311 |
| NR_030721.1 | 0,892649741 |
| NR_030738.1 | 0,82307557  |
| NR_030776.1 | 0,997667358 |
| NR_033145.1 | 1,108519286 |
| NR_033148.1 | 1,127797883 |
| NR_033168.1 | 1,080979872 |
| NR_033198.1 | 0,731622729 |
| NR_033199.1 | 1,282715174 |
| NR_033207.1 | 0,997667358 |
| NR_033214.1 | 1,017924563 |
| NR_033215.1 | 0,60153473  |
| NR_033219.1 | 1,256801736 |
| NR_033220.1 | 0,831389465 |
| NR_033221.1 | 1,012231845 |
| NR_033222.1 | 0,820915267 |
| NR_033225.1 | 0,801251597 |
| NR_033228.1 | 0,872958938 |
| NR_033261.1 | 0,486318139 |
| NR_033299.1 | 0,544182195 |
| NR_033301.1 | 0,683695572 |
| NR_033303.1 | 1,363478722 |
| NR_033305.1 | 0,867536833 |
| NR_033324.1 | 0,910913674 |
| NR_033332.1 | 0,898799421 |
| NR_033340.1 | 0,787632124 |
| NR_033355.1 | 0,895864566 |
| NR_033450.1 | 0,570095633 |
| NR_033451.1 | 0,665111572 |
| NR_033452.1 | 1,008752551 |
| NR_033455.1 | 1,140191266 |
| NR_033457.1 | 1,108519286 |
| NR_033459.1 | 0,913526737 |
| NR_033472.1 | 0,906970325 |
| NR_033484.1 | 0,285047816 |
| NR_033493.1 | 0,570095633 |

|             |             |
|-------------|-------------|
| NR_033498.1 | 0,431423722 |
| NR_033503.1 | 0,51603484  |
| NR_033509.1 | 0,628160929 |
| NR_033510.1 | 0,634879228 |
| NR_033513.1 | 1,662778929 |
| NR_033514.1 | 0,867269405 |
| NR_033520.1 | 0,822309443 |
| NR_033521.1 | 0,864645043 |
| NR_033523.1 | 0,665111572 |
| NR_033532.1 | 1,396734301 |
| NR_033536.1 | 0,917395271 |
| NR_033545.1 | 1,330223144 |
| NR_033548.1 | 0,69836715  |
| NR_033551.1 | 0,793017643 |
| NR_033552.1 | 0,942241393 |
| NR_033553.1 | 0,572734965 |
| NR_033554.1 | 1,053093322 |
| NR_033561.1 | 1,173726303 |
| NR_033564.1 | 0,633439592 |
| NR_033566.1 | 1,115039988 |
| NR_033571.1 | 1,282715174 |
| NR_033574.1 | 0,623542099 |
| NR_033581.1 | 1,247084197 |
| NR_033585.1 | 0,997667358 |
| NR_033586.1 | 0,875372649 |
| NR_033602.1 | 1,343013751 |
| NR_033609.2 | 0,728027531 |
| NR_033611.1 | 0,781506097 |
| NR_033621.1 | 0,498833679 |
| NR_033624.1 | 0,934751398 |
| NR_033625.1 | 0,7759635   |
| NR_033626.1 | 0,956097884 |
| NR_033628.1 | 0,961823021 |
| NR_033631.1 | 1,140191266 |
| NR_033639.1 | 0,770924776 |
| NR_033641.3 | 0,498833679 |
| NR_033642.1 | 1,216667509 |
| NR_033729.1 | 0,71924856  |
| NR_033736.1 | 0,631855993 |
| NR_033745.1 | 1,45115252  |
| NR_033780.1 | 1,032411992 |
| NR_033782.1 | 0,884777133 |
| NR_033802.1 | 1,272885939 |
| NR_033803.1 | 0,731622729 |
| NR_034038.1 | 0,883648231 |
| NR_034042.1 | 0,634879228 |
| NR_034045.1 | 0,498833679 |
| NR_034048.1 | 0,904136043 |
| NR_034049.2 | 2,556522604 |
| NR_034052.1 | 0,586863152 |
| NR_034155.1 | 1,21145322  |
| NR_035409.1 | 0,779427623 |
| NR_035412.1 | 0,690692786 |
| NR_035430.1 | 0,570095633 |
| NR_035443.1 | 0,954290516 |
| NR_035445.1 | 1,140191266 |

|             |             |
|-------------|-------------|
| NR_035453.1 | 0,383718214 |
| NR_035455.1 | 1,441075072 |
| NR_035462.1 | 1,795801244 |
| NR_035464.1 | 1,078559306 |
| NR_035472.1 | 0,554259643 |
| NR_035494.1 | 1,203069461 |
| NR_035501.1 | 0,903293418 |
| NR_036449.1 | 1,173726303 |
| NR_036450.1 | 1,099817599 |
| NR_036456.1 | 0,992524742 |
| NR_036469.2 | 1,151154643 |
| NR_036590.1 | 0,7759635   |
| NR_036602.1 | 0,965102548 |
| NR_036607.1 | 2,909863127 |
| NR_036613.1 | 1,163381597 |
| NR_036654.1 | 0,613949143 |
| NR_037145.1 | 0,852895438 |
| NR_037189.1 | 0,071261954 |
| NR_037206.1 | 0,977714011 |
| NR_037220.1 | 1,346850933 |
| NR_037221.1 | 0,791253422 |
| NR_037224.1 | 0,995013987 |
| NR_037237.1 | 0,581972625 |
| NR_037281.1 | 0,655873911 |
| NR_037569.1 | 0,831199433 |
| NR_037610.2 | 1,169309054 |
| NR_037666.1 | 1,011719011 |
| NR_037683.1 | 1,08836439  |
| NR_037854.1 | 0,766324202 |
| NR_037865.1 | 1,068929312 |
| NR_037906.1 | 1,088724299 |
| NR_037908.1 | 0,5372055   |
| NR_037954.1 | 1,285230302 |
| NR_037957.1 | 0,963139708 |
| NR_037958.1 | 1,094662795 |
| NR_037960.1 | 1,723243618 |
| NR_037961.1 | 1,190764266 |
| NR_037964.1 | 0,958455277 |
| NR_037965.1 | 0,997667358 |
| NR_037976.1 | 0,86939584  |
| NR_037988.1 | 0,592364994 |
| NR_037993.1 | 0,26026105  |
| NR_037996.1 | 0,647608636 |
| NR_037997.1 | 0,643058801 |
| NR_038011.1 | 0,997667358 |
| NR_038014.1 | 0,694029466 |
| NR_038015.1 | 0,306974572 |
| NR_038023.1 | 0,720537536 |
| NR_038025.1 | 0,356309771 |
| NR_038029.1 | 1,272885939 |
| NR_038032.1 | 1,143991903 |
| NR_038037.1 | 1,170816238 |
| NR_038038.1 | 0,720537536 |
| NR_038043.1 | 0,748250518 |
| NR_038047.1 | 1,282715174 |
| NR_038053.1 | 0,77465936  |

|             |             |
|-------------|-------------|
| NR_038055.1 | 0,7759635   |
| NR_038058.1 | 1,034135616 |
| NR_038067.1 | 1,106324199 |
| NR_038073.1 | 0,991866966 |
| NR_038077.1 | 0,743715667 |
| NR_038079.1 | 0,910913674 |
| NR_038089.1 | 1,379128406 |
| NR_038090.1 | 0,997667358 |
| NR_038091.1 | 1,017039539 |
| NR_038097.1 | 1,093096409 |
| NR_038101.2 | 0,570095633 |
| NR_038116.1 | 1,039236831 |
| NR_038126.1 | 0,835256392 |
| NR_038153.1 | 1,107000767 |
| NR_038156.1 | 1,197200829 |
| NR_038158.1 | 1,274797179 |
| NR_038162.1 | 1,995334715 |
| NR_038184.1 | 0,453485163 |
| NR_038186.1 | 0,780033658 |
| NR_038188.1 | 0,665111572 |
| NR_038349.1 | 0,897900622 |
| NR_039536.1 | 0,598600415 |
| NR_039559.1 | 1,157294135 |
| NR_039579.1 | 0,997667358 |
| NR_040272.1 | 0,730000506 |
| NR_040277.1 | 0,704235782 |
| NR_040278.1 | 0,648483782 |
| NR_040300.1 | 0,949534283 |
| NR_040303.1 | 0,958285751 |
| NR_040309.1 | 0,94778399  |
| NR_040316.1 | 0,997667358 |
| NR_040318.1 | 0,897423269 |
| NR_040321.1 | 0,9710834   |
| NR_040327.1 | 2,047843524 |
| NR_040328.1 | 0,886815429 |
| NR_040331.1 | 1,662778929 |
| NR_040333.1 | 1,151154643 |
| NR_040334.1 | 1,18064565  |
| NR_040337.1 | 0,356309771 |
| NR_040339.1 | 0,473891995 |
| NR_040343.1 | 0,249416839 |
| NR_040348.1 | 1,169678971 |
| NR_040353.1 | 0,997667358 |
| NR_040355.1 | 0,700489847 |
| NR_040361.1 | 0,892649741 |
| NR_040362.1 | 1,596267772 |
| NR_040363.1 | 1,995334715 |
| NR_040366.1 | 1,401785781 |
| NR_040371.1 | 1,082575218 |
| NR_040374.1 | 0,591210286 |
| NR_040375.1 | 0,909637885 |
| NR_040376.1 | 0,872958938 |
| NR_040387.1 | 1,149486303 |
| NR_040389.1 | 0,748250518 |
| NR_040398.1 | 1,296967565 |
| NR_040400.1 | 1,140191266 |

|             |             |
|-------------|-------------|
| NR_040401.1 | 1,214742233 |
| NR_040402.1 | 1,311747822 |
| NR_040403.1 | 0,726271257 |
| NR_040404.1 | 1,097434093 |
| NR_040409.1 | 1,183279889 |
| NR_040412.1 | 0,997667358 |
| NR_040414.1 | 1,496501037 |
| NR_040417.1 | 0,969747562 |
| NR_040418.1 | 0,787632124 |
| NR_040421.1 | 0,798133886 |
| NR_040422.1 | 0,997667358 |
| NR_040427.1 | 1,15583724  |
| NR_040429.1 | 1,111686484 |
| NR_040431.1 | 1,097434093 |
| NR_040432.1 | 0,371679996 |
| NR_040438.1 | 0,688865556 |
| NR_040439.1 | 0,735123316 |
| NR_040441.1 | 1,03148659  |
| NR_040442.1 | 2,120043135 |
| NR_040446.1 | 1,074781743 |
| NR_040447.1 | 0,65728673  |
| NR_040452.1 | 1,017444904 |
| NR_040453.1 | 0,872958938 |
| NR_040456.1 | 1,795801244 |
| NR_040462.1 | 1,034618001 |
| NR_040469.1 | 1,042318204 |
| NR_040504.1 | 0,581972625 |
| NR_040505.1 | 1,263711986 |
| NR_040520.1 | 0,753564554 |
| NR_040529.1 | 0,748250518 |
| NR_040534.1 | 0,960716715 |
| NR_040563.1 | 0,944220892 |
| NR_040577.1 | 0,508245635 |
| NR_040601.1 | 0,842689904 |
| NR_040608.1 | 1,745917876 |
| NR_040613.1 | 1,311219956 |
| NR_040616.1 | 0,427571725 |
| NR_040619.1 | 2,394401658 |
| NR_040621.1 | 1,122375777 |
| NR_040623.1 | 0,917853969 |
| NR_040628.1 | 0,932081134 |
| NR_040630.1 | 0,665111572 |
| NR_040637.1 | 1,022000708 |
| NR_040640.1 | 0,858457959 |
| NR_040642.1 | 1,101591041 |
| NR_040660.1 | 0,52733846  |
| NR_040667.1 | 0,857254915 |
| NR_040684.1 | 1,418904686 |
| NR_040686.1 | 0,674892624 |
| NR_040698.1 | 1,377731113 |
| NR_040706.1 | 0,598600415 |
| NR_040707.1 | 0,448950311 |
| NR_040708.1 | 0,944537143 |
| NR_040714.1 | 1,338781565 |
| NR_040717.1 | 0,972086143 |
| NR_040719.1 | 1,773630858 |

|             |             |
|-------------|-------------|
| NR_040721.1 | 0,999822147 |
| NR_040734.1 | 0,958285751 |
| NR_040736.1 | 0,621189109 |
| NR_040737.1 | 0,694029466 |
| NR_040761.1 | 1,396734301 |
| NR_040766.1 | 1,325403495 |
| NR_040767.1 | 0,598600415 |
| NR_040771.1 | 0,304842804 |
| NR_044986.1 | 1,146129762 |
| NR_045001.1 | 0,332555786 |
| NR_045007.1 | 1,037209052 |
| NR_045008.1 | 1,014002724 |
| NR_045032.1 | 1,431435774 |
| NR_045055.1 | 0,964411779 |
| NR_045056.1 | 1,335008119 |
| NR_045057.1 | 0,989686019 |
| NR_045065.1 | 0,822637997 |
| NR_045068.1 | 2,793468602 |
| NR_045069.1 | 0,908033181 |
| NR_045076.1 | 1,330223144 |
| NR_045078.1 | 0,498833679 |
| NR_045093.1 | 1,140191266 |
| NR_045098.1 | 0,598600415 |
| NR_045113.1 | 1,425239082 |
| NR_045146.1 | 1,033157501 |
| NR_045157.1 | 0,760127511 |
| NR_045161.1 | 1,115039988 |
| NR_045164.1 | 0,920716019 |
| NR_045171.1 | 0,720537536 |
| NR_045175.1 | 0,213785862 |
| NR_045176.1 | 1,417737824 |
| NR_045187.1 | 0,789819991 |
| NR_045190.2 | 0,199533472 |
| NR_045194.1 | 0,952318841 |
| NR_045195.1 | 0,7759635   |
| NR_045199.1 | 1,07806546  |
| NR_045266.1 | 0,774887268 |
| NR_045268.1 | 1,195632786 |
| NR_045269.2 | 1,576958081 |
| NR_045270.1 | 1,596267772 |
| NR_045273.1 | 1,274797179 |
| NR_045282.1 | 1,01649127  |
| NR_045289.1 | 0,94778399  |
| NR_045290.1 | 1,208354874 |
| NR_045294.1 | 0,973120182 |
| NR_045295.1 | 0,916225124 |
| NR_045299.1 | 1,020690451 |
| NR_045300.1 | 1,140191266 |
| NR_045301.1 | 1,140191266 |
| NR_045306.1 | 1,254210393 |
| NR_045320.1 | 1,662778929 |
| NR_045322.1 | 0,997667358 |
| NR_045323.1 | 0,973913373 |
| NR_045328.1 | 0,731622729 |
| NR_045329.1 | 1,282715174 |
| NR_045334.1 | 0,319253554 |

|             |             |
|-------------|-------------|
| NR_045335.1 | 0,997667358 |
| NR_045346.1 | 1,995334715 |
| NR_045347.1 | 1,011852202 |
| NR_045360.1 | 1,080806304 |
| NR_045365.1 | 2,244751555 |
| NR_045369.1 | 0,667313928 |
| NR_045372.1 | 0,798133886 |
| NR_045376.1 | 1,773630858 |
| NR_045392.1 | 2,59393513  |
| NR_045402.1 | 0,886429185 |
| NR_045403.1 | 1,241541601 |
| NR_045419.1 | 1,613276351 |
| NR_045420.2 | 0,816913507 |
| NR_045421.1 | 0,960564026 |
| NR_045422.1 | 0,938981043 |
| NR_045434.2 | 0,997667358 |
| NR_045444.1 | 1,513702198 |
| NR_045447.1 | 0,997667358 |
| NR_045448.1 | 0,781305762 |
| NR_045454.1 | 0,514422231 |
| NR_045458.1 | 1,238483616 |
| NR_045461.1 | 0,72557626  |
| NR_045473.1 | 1,377731113 |
| NR_045482.1 | 0,427571725 |
| NR_045499.1 | 0,63739859  |
| NR_045500.1 | 0,743359992 |
| NR_045519.1 | 1,130689672 |
| NR_045535.1 | 0,249416839 |
| NR_045537.1 | 1,330223144 |
| NR_045598.1 | 0,931156201 |
| NR_045606.1 | 1,444897553 |
| NR_045611.1 | 0,798133886 |
| NR_045614.1 | 1,12372641  |
| NR_045618.1 | 0,915101783 |
| NR_045619.1 | 0,825342996 |
| NR_045633.1 | 0,544182195 |
| NR_045643.1 | 1,07570899  |
| NR_045645.1 | 1,078559306 |
| NR_045668.1 | 2,494168394 |
| NR_045686.1 | 1,330223144 |
| NR_045687.1 | 1,204974861 |
| NR_045694.2 | 1,453743864 |
| NR_045696.1 | 1,043015874 |
| NR_045698.1 | 1,110370448 |
| NR_045701.1 | 1,068929312 |
| NR_045702.1 | 2,514121741 |
| NR_045708.1 | 0,765651693 |
| NR_045709.1 | 0,855866921 |
| NR_045710.1 | 0,739012858 |
| NR_045719.1 | 0,105017617 |
| NR_045746.1 | 1,496501037 |
| NR_045749.1 | 0,837547905 |
| NR_045750.1 | 0,864645043 |
| NR_045765.2 | 1,076847307 |
| NR_045766.1 | 0,928862712 |
| NR_045780.1 | 0,748250518 |

|             |             |
|-------------|-------------|
| NR_045783.1 | 0,80763548  |
| NR_045794.1 | 0,88542978  |
| NR_045798.1 | 0,927961341 |
| NR_045807.1 | 0,399066943 |
| NR_045809.1 | 0,954290516 |
| NR_045813.1 | 0,550437163 |
| NR_045820.1 | 0,69836715  |
| NR_045821.1 | 0,498833679 |
| NR_045827.1 | 1,396734301 |
| NR_045835.1 | 0,831389465 |
| NR_045836.1 | 0,997667358 |
| NR_045849.1 | 0,525088083 |
| NR_045850.1 | 0,818598858 |
| NR_045851.1 | 0,498833679 |
| NR_045852.1 | 1,928823558 |
| NR_045873.1 | 0,332555786 |
| NR_045875.1 | 1,330223144 |
| NR_045880.1 | 1,541849553 |
| NR_045884.1 | 0,478880332 |
| NR_045885.1 | 0,798133886 |
| NR_045886.1 | 0,931156201 |
| NR_045889.1 | 0,931156201 |
| NR_045893.1 | 0,934179435 |
| NR_045904.1 | 0,735123316 |
| NR_045905.2 | 1,282715174 |
| NR_045911.1 | 1,425239082 |
| NR_045914.1 | 0,665111572 |
| NR_045916.1 | 1,304641929 |
| NR_045932.1 | 0,886815429 |
| NR_045944.1 | 0,272091098 |
| NR_045945.1 | 1,157294135 |
| NR_045955.1 | 0,88854749  |
| NR_045961.1 | 0,498833679 |
| NR_045967.1 | 1,904637683 |
| NR_045991.1 | 1,197200829 |
| NR_045995.1 | 1,040250721 |
| NR_045997.1 | 1,039236831 |
| NR_046001.1 | 0,943739392 |
| NR_046007.1 | 0,869761286 |
| NR_046011.1 | 1,014364719 |
| NR_046013.1 | 1,179061423 |
| NR_046021.1 | 0,570095633 |
| NR_046022.1 | 1,496501037 |
| NR_046036.1 | 1,643216824 |
| NR_046046.1 | 1,247084197 |
| NR_046062.1 | 1,639024945 |
| NR_046069.1 | 0,498833679 |
| NR_046142.1 | 1,042894945 |
| NR_046157.1 | 1,995334715 |
| NR_046194.1 | 0,598600415 |
| NR_046277.1 | 1,496501037 |
| NR_046286.1 | 0,808236847 |
| NR_049205.1 | 0,997667358 |
| NR_051981.1 | 1,318346151 |
| NR_073027.1 | 0,544182195 |
| NR_073028.1 | 1,112399104 |



|             |             |
|-------------|-------------|
| NR_073181.1 | 1,710286899 |
| NR_073359.1 | 1,02563934  |
| NR_073370.1 | 0,925372622 |
| NR_073374.1 | 1,063628836 |
| NR_073429.1 | 1,077480746 |
| NR_073433.1 | 0,598600415 |
| NR_073442.1 | 0,748250518 |
| NR_075078.1 | 0,844180072 |
| NR_075087.1 | 0,399066943 |
| NR_077059.1 | 1,122375777 |
| NR_077219.1 | 0,771780409 |
| NR_077221.1 | 0,810604728 |
| NR_077223.1 | 0,930204806 |
| NR_077224.1 | 1,014852059 |
| NR_077233.1 | 0,943739392 |
| NR_077237.1 | 1,632546585 |
| NR_078345.1 | 1,520255021 |
| NR_102275.1 | 0,840140933 |
| NR_102276.1 | 1,130689672 |
| NR_102283.1 | 0,374125259 |
| NR_102284.1 | 2,59393513  |
| NR_102285.1 | 0,720537536 |
| NR_102315.1 | 0,532089257 |
| NR_102319.1 | 1,377731113 |
| NR_102329.1 | 0,272091098 |
| NR_102361.1 | 0,855143449 |
| NR_102366.1 | 1,008407796 |
| NR_102393.1 | 0,650652625 |
| NR_102396.1 | 0,779427623 |
| NR_102683.1 | 1,349785249 |
| NR_102704.1 | 2,793468602 |
| NR_102715.1 | 1,496501037 |
| NR_103487.1 | 2,609283859 |
| NR_103491.1 | 0,7759635   |
| NR_103513.1 | 2,793468602 |
| NR_103550.1 | 0,775047369 |
| NR_104044.1 | 0,311771049 |
| NR_104093.1 | 1,045941585 |
| NR_104306.1 | 0,825655744 |
| NR_104354.1 | 0,787632124 |
| NR_104358.1 | 1,151154643 |
| NR_104410.1 | 0,272091098 |
| NR_104433.1 | 1,282715174 |
| NR_104611.1 | 1,870626296 |
| NR_105744.1 | 0,383718214 |
| NR_105776.1 | 0,780783149 |
| NR_105784.1 | 1,710286899 |
| NR_105797.1 | 1,029172643 |
| NR_105806.1 | 1,496501037 |
| NR_105823.1 | 1,795801244 |
| NR_105853.1 | 0,756851099 |
| NR_105887.1 | 0,748250518 |
| NR_105920.1 | 2,194868187 |
| NR_105994.1 | 1,080806304 |
| NR_106012.1 | 0,886815429 |
| NR_106018.1 | 0,780783149 |

|             |             |
|-------------|-------------|
| NR_106047.1 | 0,997667358 |
| NR_106072.1 | 1,662778929 |
| NR_106109.1 | 0,748250518 |
| NR_106112.1 | 0,591210286 |
| NR_106141.1 | 0,554259643 |
| NR_106169.1 | 1,296967565 |
| NR_106171.1 | 1,050176166 |
| NR_106180.1 | 0,548717047 |
| NR_108026.1 | 0,665111572 |
| NR_108037.1 | 0,966969901 |
| NR_108041.1 | 1,118596734 |
| NR_110333.1 | 0,249416839 |
| NR_110354.1 | 1,81394065  |
| NR_110440.1 | 0,93051667  |
| NR_110448.1 | 0,415694732 |
| NR_110477.1 | 1,151718935 |
| NR_110483.1 | 0,770924776 |
| NR_110489.1 | 0,498833679 |
| NR_110496.1 | 0,626195469 |
| NR_110499.1 | 1,197200829 |
| NR_110510.1 | 0,383718214 |
| NR_110511.1 | 1,381385572 |
| NR_110986.1 | 1,080806304 |
| NR_111916.1 | 1,260211399 |
| NR_125720.1 | 1,425239082 |
| NR_125731.1 | 0,69836715  |
| NR_125904.1 | 0,864645043 |
| NR_126043.1 | 1,324093083 |
| NR_126066.1 | 1,207702591 |
| NR_126067.1 | 0,997667358 |
| NR_126079.1 | 1,151154643 |
| NR_126433.1 | 1,173182911 |
| NR_126474.1 | 2,993002073 |
| NR_126477.1 | 0,415694732 |
| NR_126484.1 | 1,108519286 |
| NR_126490.1 | 0,712619541 |
| NR_126495.1 | 0,374125259 |
| NR_126539.1 | 1,034157269 |
| NR_126552.1 | 1,496501037 |
| NR_126553.1 | 1,102684974 |
| NR_126558.1 | 0,897900622 |
| NR_128568.1 | 0,36278813  |
| NR_130128.1 | 0,805345939 |
| NR_130157.1 | 0,544182195 |
| NR_130166.1 | 1,176735858 |
| NR_130173.1 | 0,840140933 |
| NR_130177.1 | 0,825655744 |
| NR_130314.1 | 2,743585234 |
| NR_130345.1 | 0,623542099 |
| NR_130743.1 | 0,356309771 |
| NR_130956.1 | 1,00828084  |
| NR_130957.1 | 1,001383065 |
| NR_130958.1 | 0,914528411 |
| NR_130960.1 | 0,792667216 |
| NR_130962.1 | 1,017620705 |
| NR_130965.1 | 3,135525981 |

|                |             |
|----------------|-------------|
| NR_130981.1    | 1,330223144 |
| NR_130997.1    | 1,100368409 |
| NR_131001.1    | 1,169678971 |
| NR_131013.1    | 1,221144846 |
| NR_131014.1    | 0,665111572 |
| NR_131019.1    | 0,690692786 |
| NR_131021.1    | 0,623542099 |
| NR_131031.1    | 1,995334715 |
| NR_131033.1    | 1,639024945 |
| NR_131039.1    | 0,631855993 |
| NR_131042.1    | 1,052635256 |
| NR_131044.1    | 1,169678971 |
| NR_131059.1    | 0,869761286 |
| NR_131098.1    | 0,731622729 |
| NR_131111.1    | 0,85820848  |
| NR_131118.1    | 0,383718214 |
| NR_131123.1    | 1,53807051  |
| NR_131144.1    | 0,997667358 |
| NR_131150.1    | 2,244751555 |
| NR_131166.1    | 2,42290644  |
| NR_131181.1    | 0,955904538 |
| NR_131182.1    | 0,798133886 |
| NR_131195.1    | 0,332555786 |
| NR_131197.1    | 0,935313148 |
| NR_131206.1    | 1,19911942  |
| NR_131207.1    | 1,187699235 |
| NR_131212.1    | 0,74508533  |
| NR_131748.1    | 0,374125259 |
| NR_131758.1    | 0,951264225 |
| NR_131918.1    | 1,021141884 |
| NR_131930.1    | 2,897986134 |
| NR_131979.1    | 1,912195769 |
| NR_131983.1    | 0,885569902 |
| NR_132099.1    | 1,151154643 |
| NR_132129.1    | 0,743359992 |
| NR_132314.1    | 0,712619541 |
| NR_132424.1    | 0,72557626  |
| NR_132727.1    | 1,086568409 |
| NR_132747.1    | 0,453485163 |
| NR_133568.1    | 1,113250771 |
| NR_134309.1    | 0,831389465 |
| NR_135273.1    | 0,665111572 |
| NR_136901.1    | 0,970703375 |
| NR_136907.1    | 0,739991683 |
| NR_136916.1    | 0,598600415 |
| NR_136924.1    | 1,140191266 |
| NR_136925.1    | 0,615581987 |
| NR_137201.1    | 1,15965025  |
| NR_137274.1    | 0,453485163 |
| NR_137279.1    | 0,778667206 |
| NR_137282.1    | 1,464575681 |
| XM_001004454.3 | 0,554259643 |
| XM_001473434.6 | 0,997667358 |
| XM_001474178.5 | 1,496501037 |
| XM_001476571.4 | 1,143160514 |
| XM_001478256.5 | 1,21145322  |

|                |             |
|----------------|-------------|
| XM_001478443.6 | 0,754991514 |
| XM_001480144.5 | 0,748250518 |
| XM_001480984.6 | 1,45115252  |
| XM_003084522.6 | 0,591210286 |
| XM_003688869.3 | 0,758227192 |
| XM_003945446.4 | 1,080806304 |
| XM_003945557.2 | 0,581972625 |
| XM_006495433.3 | 0,72557626  |
| XM_006495524.3 | 1,268221217 |
| XM_006495550.3 | 0,786040948 |
| XM_006495607.2 | 0,549439994 |
| XM_006495630.3 | 0,854003258 |
| XM_006495695.3 | 1,829056822 |
| XM_006495763.1 | 0,420070466 |
| XM_006495798.3 | 0,625809524 |
| XM_006495799.2 | 0,814422333 |
| XM_006495881.2 | 1,147317461 |
| XM_006495882.3 | 0,840140933 |
| XM_006495902.3 | 1,156670593 |
| XM_006495933.3 | 0           |
| XM_006496028.3 | 0,544182195 |
| XM_006496096.3 | 0,659173076 |
| XM_006496135.2 | 0,920923715 |
| XM_006496152.2 | 0,764878308 |
| XM_006496170.1 | 0,682614508 |
| XM_006496175.3 | 0,617603602 |
| XM_006496191.2 | 2,549594359 |
| XM_006496257.3 | 1,425239082 |
| XM_006496391.3 | 0,665111572 |
| XM_006496540.2 | 0,285047816 |
| XM_006496541.2 | 1,349785249 |
| XM_006496600.3 | 0,677660847 |
| XM_006496639.3 | 0,31505285  |
| XM_006496671.3 | 0,377495757 |
| XM_006496702.1 | 0,997667358 |
| XM_006496703.3 | 0,469490521 |
| XM_006496739.3 | 0,987382127 |
| XM_006496741.3 | 1,371792617 |
| XM_006496775.3 | 2,494168394 |
| XM_006496780.3 | 1,282715174 |
| XM_006496789.1 | 0,835256392 |
| XM_006496816.3 | 1,036039179 |
| XM_006496849.1 | 1,282715174 |
| XM_006496866.3 | 1,341690584 |
| XM_006496903.3 | 0,834001159 |
| XM_006496910.3 | 0,460461857 |
| XM_006496926.1 | 0,997667358 |
| XM_006496949.3 | 0,918021644 |
| XM_006496950.3 | 1,344682091 |
| XM_006496961.2 | 2,244751555 |
| XM_006496963.3 | 1,08836439  |
| XM_006496969.3 | 1,02463134  |
| XM_006497040.3 | 1,064949456 |
| XM_006497198.2 | 1,496501037 |
| XM_006497200.2 | 0,911449191 |
| XM_006497207.2 | 1,051595323 |

|                |             |
|----------------|-------------|
| XM_006497237.3 | 1,296967565 |
| XM_006497309.2 | 0,36278813  |
| XM_006497312.3 | 0,436479469 |
| XM_006497368.2 | 0,872958938 |
| XM_006497369.2 | 0,955213428 |
| XM_006497430.3 | 0,928862712 |
| XM_006497477.2 | 0,823984376 |
| XM_006497505.3 | 0,997667358 |
| XM_006497517.3 | 0,796383593 |
| XM_006497520.3 | 2,194868187 |
| XM_006497531.2 | 0,586863152 |
| XM_006497547.3 | 1,408471564 |
| XM_006497644.3 | 0,383718214 |
| XM_006497646.3 | 1,893531924 |
| XM_006497647.1 | 1,006496272 |
| XM_006497648.2 | 1,16198904  |
| XM_006497698.3 | 0,791253422 |
| XM_006497776.1 | 0,266044629 |
| XM_006497777.3 | 0,874607067 |
| XM_006497829.1 | 0,613949143 |
| XM_006497853.1 | 0,856404723 |
| XM_006497922.2 | 0,066511157 |
| XM_006497924.3 | 1,995334715 |
| XM_006497943.3 | 0,783115238 |
| XM_006497947.1 | 2,743585234 |
| XM_006498054.2 | 0,864645043 |
| XM_006498071.2 | 1,260211399 |
| XM_006498159.3 | 1,19522525  |
| XM_006498237.3 | 0,886815429 |
| XM_006498252.1 | 1,639024945 |
| XM_006498255.1 | 0,721716812 |
| XM_006498256.3 | 0,872958938 |
| XM_006498317.3 | 0,973913373 |
| XM_006498323.3 | 0,997667358 |
| XM_006498372.1 | 2,194868187 |
| XM_006498386.3 | 0,731622729 |
| XM_006498391.2 | 0,598600415 |
| XM_006498511.2 | 1,147317461 |
| XM_006498513.3 | 0,80457045  |
| XM_006498545.3 | 1,027010515 |
| XM_006498562.3 | 1,377731113 |
| XM_006498563.3 | 1,41336209  |
| XM_006498612.2 | 1,05946976  |
| XM_006498680.3 | 1,045175327 |
| XM_006498794.3 | 1,621209456 |
| XM_006498860.3 | 0,821608412 |
| XM_006498901.3 | 0,908514104 |
| XM_006498923.3 | 1,119830708 |
| XM_006499026.2 | 1,995334715 |
| XM_006499059.3 | 1,115039988 |
| XM_006499100.3 | 1,190764266 |
| XM_006499113.3 | 0,997667358 |
| XM_006499196.2 | 1,041044199 |
| XM_006499210.3 | 0,997667358 |
| XM_006499217.3 | 1,073576831 |
| XM_006499319.2 | 0,374125259 |

|                |             |
|----------------|-------------|
| XM_006499342.3 | 1,144383146 |
| XM_006499352.3 | 0,638507109 |
| XM_006499381.3 | 0,641357587 |
| XM_006499419.1 | 1,884482787 |
| XM_006499433.3 | 1,371792617 |
| XM_006499465.2 | 0,256974925 |
| XM_006499466.3 | 0,923766072 |
| XM_006499474.3 | 0,803875857 |
| XM_006499476.3 | 0,762922097 |
| XM_006499537.2 | 1,089631109 |
| XM_006499557.2 | 1,175030443 |
| XM_006499616.3 | 0,748250518 |
| XM_006499691.3 | 1,632546585 |
| XM_006499707.3 | 1,043537121 |
| XM_006499838.3 | 0,886815429 |
| XM_006499909.1 | 0,448950311 |
| XM_006499919.2 | 0,80763548  |
| XM_006499925.1 | 1,123622031 |
| XM_006499956.2 | 0,967402259 |
| XM_006499991.3 | 1,08836439  |
| XM_006500001.2 | 1,611616501 |
| XM_006500002.2 | 0,825655744 |
| XM_006500072.3 | 0,825846868 |
| XM_006500123.3 | 0,997667358 |
| XM_006500125.2 | 0,826193281 |
| XM_006500172.3 | 0,943739392 |
| XM_006500207.2 | 1,330223144 |
| XM_006500244.3 | 0,798133886 |
| XM_006500245.3 | 0,67558577  |
| XM_006500254.3 | 1,087159114 |
| XM_006500255.3 | 0,199533472 |
| XM_006500260.3 | 1,425239082 |
| XM_006500329.3 | 0,831389465 |
| XM_006500388.1 | 1,496501037 |
| XM_006500389.1 | 0,399066943 |
| XM_006500398.3 | 0,902000625 |
| XM_006500428.3 | 1,371792617 |
| XM_006500439.1 | 0,712619541 |
| XM_006500443.1 | 0,789819991 |
| XM_006500444.3 | 0,937202669 |
| XM_006500452.1 | 1,25479812  |
| XM_006500514.2 | 1,115039988 |
| XM_006500526.2 | 0,8953425   |
| XM_006500528.3 | 1,330223144 |
| XM_006500535.3 | 0,96548454  |
| XM_006500537.2 | 1,214724727 |
| XM_006500545.1 | 0,534464656 |
| XM_006500549.3 | 0,872958938 |
| XM_006500587.3 | 1,296967565 |
| XM_006500616.3 | 1,014868519 |
| XM_006500627.3 | 1,052085577 |
| XM_006500710.3 | 1,068929312 |
| XM_006500711.3 | 0,69836715  |
| XM_006500713.2 | 1,309438407 |
| XM_006500766.3 | 0,915831049 |
| XM_006500806.1 | 1,022000708 |

|                |             |
|----------------|-------------|
| XM_006500925.2 | 0,72557626  |
| XM_006500993.3 | 0,997667358 |
| XM_006500998.1 | 1,187699235 |
| XM_006501073.1 | 0,249416839 |
| XM_006501089.2 | 1,282715174 |
| XM_006501094.3 | 1,247084197 |
| XM_006501106.2 | 4,988336788 |
| XM_006501152.2 | 1,330223144 |
| XM_006501162.3 | 2,194868187 |
| XM_006501185.3 | 0,31505285  |
| XM_006501187.2 | 0,826350741 |
| XM_006501213.2 | 0,525088083 |
| XM_006501253.3 | 0,997667358 |
| XM_006501317.3 | 1,098879988 |
| XM_006501318.3 | 0,755808604 |
| XM_006501346.3 | 0,858328341 |
| XM_006501355.3 | 1,795801244 |
| XM_006501356.3 | 0,876737981 |
| XM_006501377.1 | 0,816273293 |
| XM_006501393.1 | 1,197200829 |
| XM_006501395.3 | 1,404124429 |
| XM_006501426.3 | 0,932602095 |
| XM_006501450.3 | 1,123586539 |
| XM_006501475.2 | 0,367561658 |
| XM_006501478.3 | 0,959295536 |
| XM_006501526.3 | 0,544182195 |
| XM_006501553.3 | 1,304641929 |
| XM_006501577.1 | 1,187699235 |
| XM_006501583.3 | 1,995334715 |
| XM_006501652.3 | 1,064178515 |
| XM_006501692.2 | 2,137858624 |
| XM_006501710.3 | 0,956097884 |
| XM_006501767.3 | 0,94778399  |
| XM_006501790.3 | 0,554259643 |
| XM_006501839.2 | 0,754991514 |
| XM_006501847.2 | 1,197200829 |
| XM_006501885.3 | 0,758227192 |
| XM_006501899.3 | 1,012338936 |
| XM_006501918.3 | 1,140191266 |
| XM_006501943.2 | 0,814761675 |
| XM_006501964.2 | 0,399066943 |
| XM_006502020.3 | 1,163945251 |
| XM_006502051.3 | 0,554259643 |
| XM_006502123.3 | 0,964411779 |
| XM_006502128.2 | 0,581972625 |
| XM_006502212.3 | 0,698964556 |
| XM_006502219.3 | 0,570095633 |
| XM_006502287.1 | 3,990669431 |
| XM_006502348.3 | 0,420070466 |
| XM_006502396.2 | 1,304641929 |
| XM_006502475.3 | 1,122375777 |
| XM_006502503.3 | 1,047550726 |
| XM_006502554.1 | 0,509677889 |
| XM_006502768.3 | 0,708021996 |
| XM_006502842.3 | 1,995334715 |
| XM_006502846.1 | 3,990669431 |

|                |             |
|----------------|-------------|
| XM_006502863.3 | 0,97362718  |
| XM_006502917.3 | 1,621209456 |
| XM_006502957.3 | 0,997667358 |
| XM_006503006.3 | 0,897900622 |
| XM_006503011.3 | 0,920923715 |
| XM_006503016.3 | 0,894700294 |
| XM_006503017.3 | 3,192535545 |
| XM_006503035.3 | 0,823655609 |
| XM_006503079.3 | 1,193637732 |
| XM_006503092.3 | 0,997667358 |
| XM_006503119.3 | 0,963265035 |
| XM_006503225.3 | 0,544182195 |
| XM_006503233.2 | 0,760127511 |
| XM_006503322.3 | 3,27804989  |
| XM_006503349.3 | 0,831389465 |
| XM_006503381.3 | 0,88318094  |
| XM_006503390.1 | 0,997667358 |
| XM_006503392.2 | 0,448950311 |
| XM_006503423.2 | 1,199323526 |
| XM_006503424.3 | 1,247084197 |
| XM_006503439.2 | 0,778180539 |
| XM_006503479.2 | 0,410804206 |
| XM_006503563.2 | 1,496501037 |
| XM_006503569.2 | 1,662778929 |
| XM_006503610.3 | 1,299287722 |
| XM_006503665.3 | 0,36278813  |
| XM_006503670.3 | 0,997667358 |
| XM_006503733.3 | 0,942241393 |
| XM_006503778.3 | 1,122375777 |
| XM_006503799.2 | 0,623542099 |
| XM_006503827.3 | 0,634879228 |
| XM_006503939.3 | 1,097576821 |
| XM_006503970.3 | 1,247084197 |
| XM_006504003.2 | 1,154780327 |
| XM_006504004.3 | 1,579639983 |
| XM_006504034.3 | 0,931366679 |
| XM_006504046.2 | 0,525088083 |
| XM_006504056.2 | 0,997667358 |
| XM_006504076.3 | 6,484837825 |
| XM_006504081.1 | 0,783881495 |
| XM_006504086.3 | 1,080806304 |
| XM_006504087.3 | 0,744023114 |
| XM_006504091.3 | 0,920923715 |
| XM_006504111.3 | 2,086031748 |
| XM_006504133.2 | 0,997667358 |
| XM_006504135.3 | 0,867536833 |
| XM_006504136.3 | 0,767436429 |
| XM_006504163.2 | 0,80763548  |
| XM_006504182.3 | 1,080806304 |
| XM_006504191.3 | 1,108519286 |
| XM_006504240.1 | 2,394401658 |
| XM_006504261.3 | 0,427571725 |
| XM_006504276.2 | 0,374125259 |
| XM_006504308.2 | 0,997667358 |
| XM_006504348.3 | 1,691696824 |
| XM_006504360.3 | 1,184729987 |



|                |             |
|----------------|-------------|
| XM_006504398.1 | 0,272091098 |
| XM_006504401.3 | 1,371792617 |
| XM_006504422.2 | 0,586863152 |
| XM_006504510.3 | 0,460461857 |
| XM_006504551.2 | 1,037574052 |
| XM_006504553.3 | 0,819429802 |
| XM_006504558.3 | 0,585587362 |
| XM_006504563.3 | 0,997667358 |
| XM_006504584.3 | 0,997667358 |
| XM_006504626.3 | 0,513949851 |
| XM_006504631.1 | 1,080806304 |
| XM_006504632.1 | 0,980164422 |
| XM_006504633.3 | 1,036039179 |
| XM_006504653.3 | 1,018027916 |
| XM_006504659.3 | 0,795437488 |
| XM_006504667.3 | 1,028844463 |
| XM_006504674.3 | 0,816273293 |
| XM_006504712.1 | 0,133022314 |
| XM_006504752.3 | 1,078559306 |
| XM_006504775.3 | 1,086348901 |
| XM_006504819.3 | 1,097434093 |
| XM_006504845.2 | 2,494168394 |
| XM_006504859.3 | 0,554259643 |
| XM_006504867.3 | 1,247084197 |
| XM_006504870.3 | 0,824518477 |
| XM_006504872.3 | 0,892649741 |
| XM_006504971.3 | 0,892279961 |
| XM_006504975.1 | 0,657000455 |
| XM_006504976.1 | 0,886815429 |
| XM_006505008.2 | 0,754991514 |
| XM_006505040.3 | 1,080806304 |
| XM_006505045.2 | 0,872958938 |
| XM_006505191.3 | 1,349785249 |
| XM_006505199.3 | 1,140191266 |
| XM_006505248.3 | 0,893381571 |
| XM_006505359.3 | 0,877947275 |
| XM_006505401.2 | 0,399066943 |
| XM_006505450.3 | 1,130689672 |
| XM_006505495.3 | 0,897900622 |
| XM_006505496.3 | 0,899305787 |
| XM_006505519.3 | 1,053093322 |
| XM_006505531.3 | 1,282715174 |
| XM_006505539.3 | 0,844180072 |
| XM_006505542.3 | 1,074411001 |
| XM_006505571.3 | 1,219371215 |
| XM_006505578.2 | 0,544182195 |
| XM_006505607.2 | 1,339724737 |
| XM_006505617.3 | 0,861621809 |
| XM_006505757.3 | 1,207702591 |
| XM_006505810.3 | 2,630213943 |
| XM_006505824.3 | 0,879838186 |
| XM_006505879.3 | 0,066511157 |
| XM_006505895.2 | 1,247084197 |
| XM_006505955.1 | 1,353977128 |
| XM_006505969.3 | 0,824185387 |
| XM_006505984.3 | 1,102684974 |

|                |             |
|----------------|-------------|
| XM_006505987.3 | 0,665111572 |
| XM_006505992.2 | 0,997667358 |
| XM_006506007.3 | 0,570095633 |
| XM_006506008.3 | 1,013701297 |
| XM_006506013.3 | 0,811661579 |
| XM_006506014.2 | 1,621209456 |
| XM_006506061.2 | 1,073991636 |
| XM_006506062.2 | 0,824159991 |
| XM_006506063.2 | 1,296967565 |
| XM_006506084.3 | 1,003164148 |
| XM_006506138.3 | 1,192838187 |
| XM_006506188.3 | 1,094215812 |
| XM_006506190.3 | 1,371792617 |
| XM_006506314.3 | 1,039236831 |
| XM_006506340.3 | 0,628964204 |
| XM_006506360.3 | 0,850600855 |
| XM_006506369.3 | 1,133712906 |
| XM_006506373.3 | 0,823317722 |
| XM_006506416.3 | 0,80247157  |
| XM_006506418.1 | 1,039236831 |
| XM_006506444.1 | 1,520255021 |
| XM_006506461.3 | 0,563898941 |
| XM_006506468.3 | 0,498833679 |
| XM_006506472.3 | 1,624109652 |
| XM_006506478.2 | 0,528176836 |
| XM_006506480.3 | 0,570095633 |
| XM_006506485.3 | 0,822637997 |
| XM_006506533.2 | 0,728027531 |
| XM_006506538.2 | 0,554259643 |
| XM_006506541.2 | 1,884482787 |
| XM_006506545.3 | 1,163945251 |
| XM_006506550.3 | 0,628160929 |
| XM_006506611.1 | 1,496501037 |
| XM_006506673.3 | 0,866825737 |
| XM_006506674.3 | 0,692824554 |
| XM_006506701.3 | 1,282715174 |
| XM_006506703.3 | 0,906970325 |
| XM_006506711.3 | 2,59393513  |
| XM_006506723.3 | 1,360455488 |
| XM_006506829.3 | 0,687281958 |
| XM_006507026.3 | 1,117387441 |
| XM_006507029.3 | 0,166277893 |
| XM_006507047.3 | 1,051595323 |
| XM_006507154.3 | 0,886815429 |
| XM_006507187.3 | 0,567301047 |
| XM_006507189.3 | 1,795801244 |
| XM_006507265.3 | 0,665111572 |
| XM_006507269.3 | 0,959539943 |
| XM_006507337.3 | 1,175822243 |
| XM_006507388.1 | 0,72557626  |
| XM_006507481.3 | 2,565430348 |
| XM_006507482.1 | 0,332555786 |
| XM_006507498.3 | 0,733578939 |
| XM_006507499.3 | 1,247084197 |
| XM_006507533.2 | 0,906970325 |
| XM_006507538.3 | 1,251311601 |

|                |             |
|----------------|-------------|
| XM_006507543.3 | 1,852810807 |
| XM_006507555.3 | 0,897900622 |
| XM_006507556.1 | 1,140191266 |
| XM_006507575.3 | 1,036791568 |
| XM_006507579.2 | 0,433768416 |
| XM_006507585.3 | 0,7759635   |
| XM_006507606.2 | 0,613949143 |
| XM_006507644.3 | 2,743585234 |
| XM_006507646.2 | 1,45115252  |
| XM_006507657.3 | 1,0562779   |
| XM_006507768.3 | 1,371792617 |
| XM_006507844.1 | 0,798133886 |
| XM_006507952.2 | 1,472747052 |
| XM_006507953.3 | 2,327890501 |
| XM_006508049.1 | 0,665111572 |
| XM_006508133.3 | 0,787632124 |
| XM_006508152.2 | 0,48274227  |
| XM_006508164.2 | 1,343013751 |
| XM_006508180.3 | 0,897900622 |
| XM_006508200.3 | 1,050176166 |
| XM_006508319.1 | 0,69836715  |
| XM_006508351.3 | 0,399066943 |
| XM_006508373.3 | 1,556361078 |
| XM_006508415.3 | 0,593207618 |
| XM_006508416.3 | 0,734808892 |
| XM_006508451.2 | 1,458129215 |
| XM_006508478.1 | 0,997667358 |
| XM_006508517.2 | 1,260211399 |
| XM_006508694.3 | 0,572734965 |
| XM_006508710.3 | 1,662778929 |
| XM_006508751.3 | 1,130689672 |
| XM_006508761.2 | 1,03148659  |
| XM_006508800.1 | 0,873774026 |
| XM_006508812.3 | 0,306974572 |
| XM_006508815.3 | 0,634879228 |
| XM_006508850.3 | 1,231902303 |
| XM_006508853.3 | 1,034231083 |
| XM_006508868.3 | 0,997667358 |
| XM_006508884.3 | 0,654719203 |
| XM_006508935.3 | 2,327890501 |
| XM_006508954.3 | 0,739380787 |
| XM_006508980.3 | 1,408471564 |
| XM_006509025.3 | 0,825655744 |
| XM_006509026.3 | 2,161612608 |
| XM_006509043.2 | 1,551927001 |
| XM_006509132.3 | 0,712619541 |
| XM_006509143.3 | 1,260211399 |
| XM_006509167.3 | 0,460461857 |
| XM_006509179.3 | 0,557519994 |
| XM_006509198.3 | 1,829056822 |
| XM_006509202.3 | 1,097434093 |
| XM_006509206.1 | 0,772387632 |
| XM_006509221.3 | 0,997667358 |
| XM_006509227.2 | 0,598600415 |
| XM_006509242.3 | 1,639024945 |
| XM_006509249.3 | 0,605142496 |

|                |             |
|----------------|-------------|
| XM_006509262.3 | 1,995334715 |
| XM_006509264.3 | 0,820229875 |
| XM_006509265.2 | 0,748250518 |
| XM_006509289.3 | 0,570095633 |
| XM_006509307.3 | 1,027899702 |
| XM_006509312.2 | 0,480358357 |
| XM_006509465.2 | 0,066511157 |
| XM_006509487.2 | 1,029172643 |
| XM_006509492.3 | 0,317439614 |
| XM_006509498.2 | 1,330223144 |
| XM_006509529.2 | 0,831389465 |
| XM_006509538.3 | 1,575264249 |
| XM_006509550.2 | 1,179061423 |
| XM_006509553.2 | 0,82347147  |
| XM_006509586.2 | 0,712619541 |
| XM_006509591.3 | 0,735123316 |
| XM_006509592.2 | 0,7759635   |
| XM_006509600.3 | 0,731622729 |
| XM_006509603.3 | 1,227898286 |
| XM_006509606.1 | 0,882551893 |
| XM_006509654.3 | 2,161612608 |
| XM_006509655.3 | 0,827333906 |
| XM_006509671.3 | 0,99351041  |
| XM_006509675.3 | 0,914528411 |
| XM_006509678.3 | 1,170340554 |
| XM_006509685.3 | 1,074411001 |
| XM_006509715.3 | 0,711669382 |
| XM_006509721.2 | 0,623542099 |
| XM_006509799.3 | 0,808919479 |
| XM_006509884.3 | 0,735123316 |
| XM_006509889.3 | 0,890479956 |
| XM_006509895.3 | 1,330223144 |
| XM_006509900.2 | 0,285047816 |
| XM_006509904.3 | 0,391940748 |
| XM_006509935.2 | 0,69836715  |
| XM_006510000.3 | 0,897900622 |
| XM_006510009.2 | 0,926405404 |
| XM_006510038.3 | 0,960716715 |
| XM_006510077.3 | 1,067679102 |
| XM_006510093.1 | 0,498833679 |
| XM_006510111.3 | 0,997667358 |
| XM_006510187.3 | 0,625403418 |
| XM_006510193.3 | 1,467157879 |
| XM_006510253.2 | 0,874276553 |
| XM_006510258.2 | 1,887025262 |
| XM_006510269.1 | 0,690692786 |
| XM_006510292.2 | 1,005283139 |
| XM_006510329.3 | 0,580731746 |
| XM_006510397.2 | 0,848017254 |
| XM_006510399.2 | 0,744023114 |
| XM_006510405.3 | 0,683586893 |
| XM_006510442.2 | 1,184729987 |
| XM_006510578.3 | 0,72557626  |
| XM_006510622.2 | 0,653644131 |
| XM_006510632.2 | 0,480358357 |
| XM_006510663.2 | 1,247084197 |

|                |             |
|----------------|-------------|
| XM_006510672.3 | 1,058132046 |
| XM_006510684.3 | 0,914528411 |
| XM_006510702.3 | 0,554259643 |
| XM_006510704.3 | 1,247084197 |
| XM_006510765.3 | 1,173726303 |
| XM_006510767.3 | 1,109904935 |
| XM_006510768.3 | 0,72557626  |
| XM_006510789.3 | 0,997667358 |
| XM_006510796.2 | 1,45115252  |
| XM_006510855.1 | 2,244751555 |
| XM_006510862.3 | 0,808635648 |
| XM_006510922.3 | 0,821608412 |
| XM_006510937.3 | 1,330223144 |
| XM_006511061.1 | 1,135957883 |
| XM_006511110.3 | 0,31505285  |
| XM_006511116.2 | 1,219371215 |
| XM_006511120.2 | 0,886815429 |
| XM_006511140.3 | 0,743359992 |
| XM_006511195.3 | 0,575577322 |
| XM_006511198.3 | 0,760127511 |
| XM_006511226.1 | 0,770475781 |
| XM_006511292.3 | 0,954290516 |
| XM_006511302.3 | 1,147050705 |
| XM_006511334.3 | 0,554259643 |
| XM_006511335.3 | 2,327890501 |
| XM_006511368.2 | 0,960716715 |
| XM_006511374.3 | 1,84184743  |
| XM_006511398.3 | 2,993002073 |
| XM_006511443.3 | 1,611616501 |
| XM_006511444.3 | 0,792265255 |
| XM_006511456.3 | 3,741252591 |
| XM_006511459.2 | 1,095930072 |
| XM_006511482.3 | 1,575264249 |
| XM_006511491.3 | 1,140191266 |
| XM_006511516.2 | 0,906970325 |
| XM_006511593.2 | 0,928178089 |
| XM_006511625.2 | 0,886815429 |
| XM_006511635.1 | 2,695824562 |
| XM_006511645.3 | 0,528176836 |
| XM_006511653.2 | 0,586863152 |
| XM_006511712.3 | 0,620171601 |
| XM_006511724.3 | 0,772387632 |
| XM_006511730.2 | 1,995334715 |
| XM_006511779.3 | 0,561187889 |
| XM_006511780.1 | 0,963265035 |
| XM_006511789.3 | 1,596267772 |
| XM_006511807.3 | 0,581972625 |
| XM_006511845.3 | 1,330223144 |
| XM_006511848.3 | 1,621209456 |
| XM_006511858.3 | 0,892649741 |
| XM_006511951.3 | 1,662778929 |
| XM_006511971.3 | 2,21357445  |
| XM_006512019.3 | 0,498833679 |
| XM_006512058.2 | 0,949874909 |
| XM_006512116.3 | 1,01025622  |
| XM_006512132.2 | 0,7759635   |

|                |             |
|----------------|-------------|
| XM_006512139.3 | 1,080806304 |
| XM_006512207.3 | 1,092683297 |
| XM_006512212.3 | 0,306974572 |
| XM_006512253.3 | 0,12470842  |
| XM_006512456.3 | 1,282715174 |
| XM_006512482.3 | 0,810604728 |
| XM_006512565.3 | 0,648483782 |
| XM_006512589.3 | 0,598600415 |
| XM_006512715.3 | 0,778824195 |
| XM_006512739.3 | 0,997667358 |
| XM_006512758.3 | 1,10507668  |
| XM_006512770.3 | 1,204081294 |
| XM_006512774.3 | 1,995334715 |
| XM_006512776.2 | 0,735123316 |
| XM_006512783.3 | 0,968640398 |
| XM_006512789.1 | 1,047550726 |
| XM_006512790.1 | 1,122375777 |
| XM_006512791.3 | 0,748250518 |
| XM_006512806.1 | 0,877874119 |
| XM_006512809.3 | 1,219371215 |
| XM_006512811.3 | 1,010925396 |
| XM_006512829.3 | 0,938615396 |
| XM_006512836.3 | 1,077480746 |
| XM_006512840.2 | 0,853077886 |
| XM_006512846.3 | 0,899536142 |
| XM_006512848.3 | 1,765103787 |
| XM_006512853.3 | 1,388058932 |
| XM_006512857.3 | 1,330223144 |
| XM_006512918.3 | 1,108519286 |
| XM_006512957.1 | 0,498833679 |
| XM_006513013.2 | 1,227898286 |
| XM_006513060.3 | 0,427571725 |
| XM_006513092.2 | 0,5372055   |
| XM_006513096.1 | 0,525088083 |
| XM_006513162.2 | 0,803676483 |
| XM_006513177.2 | 0,605480879 |
| XM_006513239.3 | 2,42290644  |
| XM_006513269.3 | 1,458129215 |
| XM_006513270.2 | 0,886815429 |
| XM_006513278.2 | 0,997667358 |
| XM_006513281.3 | 0,498833679 |
| XM_006513371.3 | 0,794182728 |
| XM_006513374.3 | 1,662778929 |
| XM_006513378.3 | 0,586863152 |
| XM_006513395.3 | 0,821608412 |
| XM_006513401.2 | 1,567762991 |
| XM_006513439.3 | 1,031296594 |
| XM_006513443.3 | 1,632546585 |
| XM_006513444.3 | 0,875146805 |
| XM_006513454.2 | 0,929701411 |
| XM_006513508.3 | 1,349785249 |
| XM_006513517.3 | 0,415694732 |
| XM_006513537.3 | 0,616206309 |
| XM_006513568.3 | 0,986066574 |
| XM_006513590.3 | 1,441075072 |
| XM_006513592.2 | 1,143667459 |

|                |             |
|----------------|-------------|
| XM_006513632.3 | 0,857950266 |
| XM_006513707.3 | 1,219371215 |
| XM_006513720.1 | 0,849864786 |
| XM_006513728.2 | 0,997667358 |
| XM_006513833.3 | 1,296967565 |
| XM_006513878.2 | 1,047550726 |
| XM_006513888.3 | 0,8595288   |
| XM_006513889.2 | 1,89556798  |
| XM_006513894.3 | 0,938981043 |
| XM_006513913.3 | 0,748250518 |
| XM_006513954.1 | 0,570095633 |
| XM_006513962.3 | 1,525844194 |
| XM_006513963.3 | 1,496501037 |
| XM_006513988.3 | 0,954290516 |
| XM_006514011.3 | 2,494168394 |
| XM_006514013.3 | 1,054272598 |
| XM_006514026.2 | 1,187699235 |
| XM_006514028.3 | 1,353977128 |
| XM_006514066.3 | 0,634879228 |
| XM_006514067.2 | 0,641357587 |
| XM_006514078.3 | 1,408471564 |
| XM_006514105.3 | 0,634879228 |
| XM_006514131.3 | 0,609685607 |
| XM_006514148.1 | 5,986004146 |
| XM_006514168.3 | 1,470246632 |
| XM_006514192.3 | 1,829056822 |
| XM_006514214.2 | 1,080806304 |
| XM_006514216.3 | 1,890317099 |
| XM_006514219.3 | 0,628915024 |
| XM_006514222.3 | 1,282715174 |
| XM_006514270.1 | 0,914528411 |
| XM_006514276.3 | 0,706681045 |
| XM_006514300.3 | 0,798133886 |
| XM_006514341.3 | 0,698740809 |
| XM_006514419.1 | 1,197200829 |
| XM_006514441.2 | 0,443407715 |
| XM_006514447.3 | 1,662778929 |
| XM_006514450.3 | 0,561187889 |
| XM_006514456.3 | 0,892649741 |
| XM_006514458.3 | 1,272025881 |
| XM_006514496.3 | 6,734254664 |
| XM_006514529.1 | 2,161612608 |
| XM_006514531.3 | 1,122375777 |
| XM_006514570.2 | 0,69836715  |
| XM_006514575.3 | 0,997667358 |
| XM_006514599.3 | 0,532089257 |
| XM_006514600.3 | 0,634879228 |
| XM_006514710.2 | 0,498833679 |
| XM_006514724.2 | 0           |
| XM_006514748.2 | 1,627773057 |
| XM_006514781.2 | 0,94119562  |
| XM_006514782.3 | 1,044311546 |
| XM_006514787.1 | 0,266044629 |
| XM_006514842.3 | 1,068929312 |
| XM_006514874.3 | 0,928862712 |
| XM_006514892.3 | 0,762922097 |

|                |             |
|----------------|-------------|
| XM_006514913.3 | 1,884482787 |
| XM_006514956.3 | 0,738273845 |
| XM_006515024.3 | 5,986004146 |
| XM_006515149.3 | 1,184729987 |
| XM_006515152.3 | 1,496501037 |
| XM_006515158.3 | 1,108519286 |
| XM_006515166.2 | 0,748250518 |
| XM_006515176.3 | 1,021421342 |
| XM_006515203.2 | 0,609685607 |
| XM_006515206.1 | 1,632546585 |
| XM_006515318.3 | 1,154164198 |
| XM_006515345.3 | 1,310661039 |
| XM_006515347.3 | 1,226034687 |
| XM_006515399.2 | 0,924667307 |
| XM_006515404.2 | 0,581972625 |
| XM_006515524.3 | 1,041044199 |
| XM_006515603.3 | 1,102135144 |
| XM_006515605.3 | 0,806715971 |
| XM_006515632.3 | 0,997667358 |
| XM_006515690.3 | 0,831389465 |
| XM_006515701.3 | 0,586863152 |
| XM_006515708.3 | 1,995334715 |
| XM_006515758.2 | 14,96501037 |
| XM_006515760.3 | 0,921871167 |
| XM_006515781.3 | 0,910711137 |
| XM_006515820.3 | 0,819512472 |
| XM_006515981.3 | 1,710286899 |
| XM_006516029.3 | 0,650652625 |
| XM_006516055.3 | 0,374125259 |
| XM_006516084.3 | 1,394000966 |
| XM_006516117.2 | 1,140191266 |
| XM_006516123.3 | 1,010708761 |
| XM_006516139.3 | 1,870626296 |
| XM_006516154.3 | 1,696034508 |
| XM_006516156.3 | 0,948399834 |
| XM_006516174.3 | 1,208230318 |
| XM_006516181.3 | 1,247084197 |
| XM_006516186.2 | 1,710286899 |
| XM_006516207.3 | 1,269758455 |
| XM_006516214.3 | 1,381385572 |
| XM_006516260.3 | 0,922486722 |
| XM_006516266.2 | 0,997667358 |
| XM_006516267.2 | 0,153487286 |
| XM_006516270.1 | 1,282715174 |
| XM_006516273.2 | 1,439491473 |
| XM_006516283.2 | 0,760127511 |
| XM_006516336.3 | 0,825655744 |
| XM_006516359.2 | 0,903547796 |
| XM_006516378.3 | 1,381385572 |
| XM_006516452.2 | 0,532089257 |
| XM_006516509.3 | 1,140191266 |
| XM_006516573.3 | 0,641357587 |
| XM_006516660.3 | 0,498833679 |
| XM_006516707.3 | 1,044735845 |
| XM_006516752.2 | 1,08836439  |
| XM_006516792.2 | 0,811187478 |



|                |             |
|----------------|-------------|
| XM_006516794.3 | 0,798133886 |
| XM_006516846.3 | 1,053093322 |
| XM_006516850.3 | 1,621209456 |
| XM_006516853.3 | 0,991016242 |
| XM_006516856.3 | 0,554259643 |
| XM_006516932.3 | 0,872958938 |
| XM_006516937.2 | 0,586863152 |
| XM_006516983.2 | 0,86256657  |
| XM_006516985.2 | 0,927621159 |
| XM_006517017.3 | 0,266044629 |
| XM_006517074.3 | 1,007545252 |
| XM_006517148.3 | 0,383718214 |
| XM_006517150.3 | 1,419757394 |
| XM_006517151.3 | 0,757095087 |
| XM_006517172.3 | 1,632546585 |
| XM_006517175.2 | 1,45115252  |
| XM_006517253.3 | 1,060021568 |
| XM_006517275.3 | 1,203535225 |
| XM_006517306.3 | 0,89446039  |
| XM_006517322.2 | 0,591210286 |
| XM_006517362.3 | 0,748250518 |
| XM_006517396.3 | 0,665111572 |
| XM_006517418.3 | 0,581972625 |
| XM_006517419.3 | 1,22186227  |
| XM_006517420.3 | 1,102684974 |
| XM_006517475.2 | 0,921375148 |
| XM_006517476.3 | 1,236545457 |
| XM_006517479.3 | 1,140191266 |
| XM_006517521.3 | 1,254642283 |
| XM_006517569.3 | 0,997667358 |
| XM_006517610.2 | 0,844180072 |
| XM_006517617.1 | 1,995334715 |
| XM_006517646.3 | 1,219371215 |
| XM_006517647.2 | 2,993002073 |
| XM_006517649.3 | 1,309758172 |
| XM_006517671.3 | 1,084421041 |
| XM_006517722.2 | 1,534872858 |
| XM_006517751.3 | 0,704235782 |
| XM_006517794.1 | 0,98445322  |
| XM_006517803.3 | 0,782700358 |
| XM_006517940.1 | 0,5372055   |
| XM_006517946.3 | 0,453485163 |
| XM_006518017.2 | 1,122375777 |
| XM_006518073.2 | 1,995334715 |
| XM_006518075.3 | 1,296967565 |
| XM_006518100.3 | 1,108519286 |
| XM_006518103.3 | 0,892649741 |
| XM_006518105.3 | 1,118404172 |
| XM_006518383.2 | 0,628964204 |
| XM_006518384.1 | 0,997667358 |
| XM_006518429.2 | 0,581972625 |
| XM_006518441.3 | 3,27804989  |
| XM_006518442.3 | 0,076743643 |
| XM_006518470.3 | 0,899305787 |
| XM_006518547.3 | 1,194390499 |
| XM_006518564.3 | 0,831389465 |

|                |             |
|----------------|-------------|
| XM_006518622.2 | 0,69836715  |
| XM_006518715.3 | 1,676081161 |
| XM_006518732.2 | 0,798133886 |
| XM_006518735.1 | 1,263711986 |
| XM_006518767.1 | 0,872958938 |
| XM_006518792.1 | 0,72557626  |
| XM_006518821.3 | 0,922991657 |
| XM_006518824.3 | 1,296967565 |
| XM_006518836.3 | 2,078473662 |
| XM_006518904.3 | 1,110610832 |
| XM_006518910.3 | 0,703483393 |
| XM_006518911.3 | 0,807322928 |
| XM_006518922.1 | 1,058749033 |
| XM_006518975.3 | 1,371792617 |
| XM_006519016.3 | 1,117387441 |
| XM_006519080.2 | 0,584839486 |
| XM_006519121.3 | 1,108519286 |
| XM_006519124.3 | 1,115039988 |
| XM_006519202.2 | 2,494168394 |
| XM_006519291.3 | 0,685896308 |
| XM_006519309.3 | 0,997667358 |
| XM_006519321.3 | 1,045414662 |
| XM_006519330.2 | 0,825655744 |
| XM_006519434.2 | 2,225565644 |
| XM_006519455.3 | 0,997667358 |
| XM_006519461.1 | 0,980466196 |
| XM_006519470.2 | 1,208442152 |
| XM_006519478.1 | 0,665111572 |
| XM_006519505.1 | 1,269758455 |
| XM_006519507.2 | 0,720537536 |
| XM_006519531.1 | 1,688360144 |
| XM_006519620.3 | 1,227898286 |
| XM_006519698.2 | 0,72557626  |
| XM_006519699.3 | 0,878957571 |
| XM_006519927.2 | 1,12639863  |
| XM_006520030.3 | 1,207702591 |
| XM_006520046.3 | 1,128939378 |
| XM_006520143.1 | 0,997667358 |
| XM_006520168.3 | 1,01775462  |
| XM_006520173.2 | 0,892649741 |
| XM_006520177.3 | 1,033298335 |
| XM_006520237.3 | 0,542591019 |
| XM_006520261.2 | 0,997667358 |
| XM_006520314.3 | 1,995334715 |
| XM_006520351.3 | 1,446617669 |
| XM_006520352.3 | 1,106109462 |
| XM_006520385.3 | 0,238572629 |
| XM_006520405.2 | 1,135196269 |
| XM_006520455.1 | 3,990669431 |
| XM_006520458.1 | 1,829056822 |
| XM_006520459.3 | 1,080806304 |
| XM_006520468.3 | 0,949197688 |
| XM_006520469.2 | 1,140191266 |
| XM_006520531.3 | 0,855143449 |
| XM_006520551.1 | 1,45115252  |
| XM_006520552.3 | 0,570095633 |

|                |             |
|----------------|-------------|
| XM_006520601.3 | 1,947826746 |
| XM_006520621.3 | 0,767436429 |
| XM_006520622.3 | 1,564968404 |
| XM_006520623.3 | 0,701484861 |
| XM_006520660.3 | 3,491835752 |
| XM_006520665.3 | 1,330223144 |
| XM_006520671.3 | 0,895633196 |
| XM_006520685.1 | 1,278261302 |
| XM_006520758.2 | 1,713941358 |
| XM_006520772.3 | 1,202767842 |
| XM_006520807.3 | 0,356309771 |
| XM_006520810.3 | 1,03789588  |
| XM_006520822.3 | 0,5372055   |
| XM_006520833.2 | 1,031343893 |
| XM_006520884.3 | 0,598600415 |
| XM_006520926.3 | 1,465960199 |
| XM_006520927.2 | 0,436479469 |
| XM_006520947.3 | 1,115039988 |
| XM_006520986.3 | 0,997667358 |
| XM_006521017.3 | 0,399066943 |
| XM_006521036.1 | 0,754333856 |
| XM_006521088.3 | 1,330223144 |
| XM_006521151.3 | 1,138698869 |
| XM_006521170.2 | 1,282715174 |
| XM_006521173.3 | 0,7759635   |
| XM_006521191.1 | 0,997667358 |
| XM_006521196.3 | 0,374125259 |
| XM_006521207.3 | 0,767436429 |
| XM_006521209.2 | 0,650652625 |
| XM_006521221.2 | 0,900007021 |
| XM_006521266.3 | 0,690692786 |
| XM_006521277.3 | 0,498833679 |
| XM_006521281.2 | 1,995334715 |
| XM_006521284.1 | 0,901737804 |
| XM_006521307.3 | 1,128939378 |
| XM_006521310.3 | 0,593207618 |
| XM_006521319.3 | 0,992800688 |
| XM_006521333.3 | 0,32182818  |
| XM_006521336.2 | 1,643216824 |
| XM_006521366.3 | 0,665111572 |
| XM_006521385.3 | 1,072079011 |
| XM_006521389.1 | 1,301305249 |
| XM_006521390.3 | 1,680281866 |
| XM_006521448.1 | 0,443407715 |
| XM_006521450.3 | 1,496501037 |
| XM_006521487.3 | 0,701484861 |
| XM_006521493.3 | 0,748250518 |
| XM_006521553.3 | 1,247084197 |
| XM_006521582.3 | 0,886815429 |
| XM_006521617.1 | 1,065690132 |
| XM_006521622.2 | 0,498833679 |
| XM_006521646.3 | 0,634879228 |
| XM_006521671.3 | 0,973239935 |
| XM_006521750.3 | 0,937202669 |
| XM_006521782.3 | 0,983414967 |
| XM_006521797.2 | 1,467157879 |

|                |             |
|----------------|-------------|
| XM_006521837.1 | 1,757794868 |
| XM_006521906.3 | 0,872958938 |
| XM_006521932.3 | 0,695343916 |
| XM_006521952.3 | 1,140191266 |
| XM_006521997.3 | 1,496501037 |
| XM_006522041.3 | 0,645549467 |
| XM_006522071.1 | 1,368229519 |
| XM_006522095.3 | 0,820937711 |
| XM_006522200.2 | 1,567762991 |
| XM_006522217.2 | 0,665111572 |
| XM_006522235.2 | 0,997667358 |
| XM_006522250.3 | 0,94778399  |
| XM_006522410.3 | 1,005401213 |
| XM_006522467.1 | 1,496501037 |
| XM_006522468.1 | 1,179061423 |
| XM_006522479.3 | 1,330223144 |
| XM_006522489.2 | 0,939938831 |
| XM_006522498.2 | 1,83780829  |
| XM_006522567.3 | 0,902651419 |
| XM_006522569.1 | 1,995334715 |
| XM_006522570.3 | 0,906970325 |
| XM_006522614.2 | 1,247084197 |
| XM_006522653.2 | 0,819512472 |
| XM_006522655.2 | 0,894768931 |
| XM_006522664.3 | 1,214825237 |
| XM_006522668.3 | 1,147317461 |
| XM_006522669.3 | 1,596267772 |
| XM_006522687.3 | 1,010157716 |
| XM_006522764.3 | 1,745917876 |
| XM_006522765.3 | 1,282715174 |
| XM_006522805.3 | 1,257928408 |
| XM_006522873.2 | 0,805524015 |
| XM_006522879.3 | 0,706681045 |
| XM_006522904.3 | 0,533636029 |
| XM_006522940.2 | 0,783881495 |
| XM_006522973.2 | 1,071179689 |
| XM_006523005.1 | 0,885017053 |
| XM_006523018.3 | 0,864645043 |
| XM_006523069.3 | 1,884482787 |
| XM_006523223.3 | 0,712619541 |
| XM_006523240.3 | 0,356309771 |
| XM_006523247.3 | 1,116791818 |
| XM_006523407.3 | 0,882551893 |
| XM_006523409.2 | 0,665111572 |
| XM_006523445.2 | 0,816273293 |
| XM_006523462.2 | 0,249416839 |
| XM_006523509.2 | 1,031678745 |
| XM_006523510.2 | 0,586129573 |
| XM_006523553.3 | 1,060021568 |
| XM_006523641.3 | 1,235207205 |
| XM_006523651.3 | 1,068929312 |
| XM_006523652.2 | 1,282715174 |
| XM_006523653.3 | 0,690692786 |
| XM_006523684.3 | 0,886815429 |
| XM_006523730.2 | 1,080806304 |
| XM_006523787.3 | 1,567762991 |

|                |             |
|----------------|-------------|
| XM_006523790.3 | 0,55869372  |
| XM_006523819.2 | 1,596267772 |
| XM_006523873.3 | 0,7759635   |
| XM_006523887.3 | 1,343013751 |
| XM_006523888.3 | 1,41336209  |
| XM_006523890.3 | 0,997667358 |
| XM_006523910.1 | 1,073760631 |
| XM_006523922.1 | 0,598600415 |
| XM_006523990.3 | 1,238176453 |
| XM_006524001.3 | 1,05069951  |
| XM_006524004.1 | 0,166277893 |
| XM_006524032.2 | 0,598600415 |
| XM_006524083.3 | 1,069270278 |
| XM_006524086.2 | 0,902651419 |
| XM_006524091.3 | 1,151154643 |
| XM_006524095.3 | 0,735123316 |
| XM_006524126.3 | 0,862847444 |
| XM_006524144.3 | 0,80763548  |
| XM_006524157.2 | 0,816273293 |
| XM_006524189.3 | 0,840140933 |
| XM_006524202.3 | 0,810604728 |
| XM_006524203.3 | 1,16506121  |
| XM_006524238.3 | 0,5372055   |
| XM_006524239.3 | 0,142523908 |
| XM_006524240.1 | 0,906970325 |
| XM_006524255.3 | 0,383718214 |
| XM_006524295.3 | 0,997667358 |
| XM_006524329.3 | 1,025042377 |
| XM_006524357.2 | 0,939693626 |
| XM_006524390.3 | 1,197200829 |
| XM_006524496.3 | 0,737406308 |
| XM_006524498.2 | 0,690692786 |
| XM_006524499.2 | 1,745917876 |
| XM_006524505.2 | 0,272091098 |
| XM_006524600.3 | 0,634879228 |
| XM_006524612.3 | 0,554259643 |
| XM_006524647.2 | 0,554259643 |
| XM_006524652.3 | 0,681949839 |
| XM_006524661.3 | 0,952318841 |
| XM_006524662.3 | 1,073121191 |
| XM_006524695.3 | 0,957760663 |
| XM_006524723.2 | 1,03815241  |
| XM_006524764.2 | 1,037574052 |
| XM_006524822.1 | 0,438973637 |
| XM_006524824.1 | 1,45115252  |
| XM_006524825.3 | 1,484334361 |
| XM_006524844.3 | 1,080806304 |
| XM_006524926.3 | 0,613949143 |
| XM_006524965.3 | 1,745917876 |
| XM_006524982.1 | 1,852810807 |
| XM_006524994.3 | 1,00993376  |
| XM_006525015.3 | 1,330223144 |
| XM_006525077.3 | 1,805302838 |
| XM_006525080.3 | 1,365229016 |
| XM_006525081.3 | 0,523775363 |
| XM_006525092.3 | 1,496501037 |

|                |             |
|----------------|-------------|
| XM_006525142.2 | 1,522755441 |
| XM_006525172.3 | 1,291098933 |
| XM_006525175.3 | 0,835708371 |
| XM_006525176.2 | 1,015170294 |
| XM_006525485.3 | 1,148069472 |
| XM_006525487.3 | 1,349785249 |
| XM_006525496.3 | 0,873579378 |
| XM_006525499.3 | 0,249416839 |
| XM_006525524.3 | 1,08836439  |
| XM_006525526.2 | 0,870605949 |
| XM_006525694.3 | 0,720917166 |
| XM_006525698.2 | 1,190226255 |
| XM_006525714.3 | 1,551927001 |
| XM_006525794.3 | 0,472579275 |
| XM_006525810.2 | 0,935313148 |
| XM_006525811.3 | 0,850267048 |
| XM_006525842.1 | 0,306974572 |
| XM_006525845.3 | 1,785299482 |
| XM_006525846.3 | 1,293272501 |
| XM_006525855.3 | 0,671506875 |
| XM_006525899.2 | 0,554259643 |
| XM_006525931.3 | 1,140191266 |
| XM_006525940.3 | 0,581972625 |
| XM_006525943.2 | 1,08836439  |
| XM_006526063.3 | 0,886815429 |
| XM_006526085.3 | 1,097434093 |
| XM_006526090.3 | 1,042090394 |
| XM_006526104.2 | 1,042008129 |
| XM_006526130.3 | 0,399066943 |
| XM_006526137.3 | 1,330223144 |
| XM_006526149.1 | 0,890356332 |
| XM_006526157.3 | 0,352117891 |
| XM_006526178.3 | 0,613949143 |
| XM_006526180.2 | 1,122375777 |
| XM_006526188.3 | 1,100736874 |
| XM_006526221.3 | 0,880294727 |
| XM_006526273.3 | 0,977306799 |
| XM_006526291.3 | 0,872958938 |
| XM_006526374.3 | 0,72557626  |
| XM_006526406.3 | 1,496501037 |
| XM_006526433.3 | 1,097434093 |
| XM_006526460.3 | 1,247084197 |
| XM_006526465.3 | 1,282715174 |
| XM_006526564.3 | 0,903151503 |
| XM_006526574.3 | 1,330223144 |
| XM_006526598.3 | 1,068929312 |
| XM_006526656.3 | 1,163331679 |
| XM_006526675.2 | 1,247084197 |
| XM_006526691.1 | 1,103802183 |
| XM_006526715.3 | 0,869761286 |
| XM_006526722.3 | 0,872958938 |
| XM_006526733.2 | 1,458129215 |
| XM_006526769.2 | 0,473891995 |
| XM_006526774.3 | 0,997667358 |
| XM_006526831.3 | 1,053093322 |
| XM_006526921.2 | 1,516454384 |

|                |             |
|----------------|-------------|
| XM_006527004.3 | 1,152860058 |
| XM_006527005.3 | 0,811436118 |
| XM_006527114.3 | 0,855143449 |
| XM_006527116.3 | 1,163945251 |
| XM_006527126.3 | 1,143480279 |
| XM_006527183.3 | 1,995334715 |
| XM_006527194.2 | 1,140191266 |
| XM_006527196.3 | 1,496501037 |
| XM_006527222.3 | 0,872958938 |
| XM_006527271.3 | 1,136583066 |
| XM_006527283.3 | 1,282715174 |
| XM_006527284.2 | 0,897900622 |
| XM_006527292.3 | 1,021707535 |
| XM_006527317.1 | 0,914528411 |
| XM_006527334.1 | 2,707954257 |
| XM_006527352.3 | 1,108519286 |
| XM_006527361.3 | 1,019893871 |
| XM_006527381.3 | 0,831389465 |
| XM_006527427.3 | 1,496501037 |
| XM_006527439.3 | 0,831389465 |
| XM_006527472.3 | 0,412163735 |
| XM_006527488.3 | 1,870626296 |
| XM_006527489.3 | 1,696034508 |
| XM_006527490.3 | 1,463245458 |
| XM_006527616.3 | 0,922842306 |
| XM_006527630.3 | 0,654719203 |
| XM_006527652.1 | 0,878542897 |
| XM_006527698.3 | 0,864645043 |
| XM_006527807.2 | 0,967435014 |
| XM_006527939.2 | 1,008984701 |
| XM_006528003.3 | 0,997667358 |
| XM_006528007.1 | 1,140191266 |
| XM_006528114.3 | 0,862847444 |
| XM_006528136.3 | 1,330223144 |
| XM_006528139.1 | 1,257928408 |
| XM_006528316.3 | 0,712619541 |
| XM_006528501.3 | 0,475079694 |
| XM_006528503.3 | 0,399066943 |
| XM_006528599.3 | 0,332555786 |
| XM_006528682.1 | 0,926405404 |
| XM_006528741.3 | 1,061286725 |
| XM_006528756.3 | 1,179061423 |
| XM_006528757.3 | 1,260211399 |
| XM_006528839.3 | 0,855143449 |
| XM_006528863.3 | 0,38798175  |
| XM_006529083.3 | 1,074054882 |
| XM_006529084.3 | 0,847559608 |
| XM_006529085.3 | 0,944880725 |
| XM_006529238.3 | 0,272091098 |
| XM_006529293.3 | 0,672845427 |
| XM_006529317.2 | 0,712044848 |
| XM_006529345.3 | 1,070037011 |
| XM_006529357.2 | 0,924667307 |
| XM_006529396.3 | 0,36278813  |
| XM_006529400.1 | 0,31505285  |
| XM_006529416.2 | 1,396734301 |

|                |             |
|----------------|-------------|
| XM_006529456.3 | 0,997667358 |
| XM_006529670.3 | 1,216934909 |
| XM_006529685.3 | 0,816273293 |
| XM_006529688.3 | 0,798133886 |
| XM_006529689.3 | 0,272091098 |
| XM_006529759.1 | 3,491835752 |
| XM_006529766.3 | 1,787487349 |
| XM_006529776.3 | 0,931495543 |
| XM_006529852.3 | 1,282715174 |
| XM_006529890.3 | 0,5372055   |
| XM_006529960.3 | 1,529756615 |
| XM_006529975.3 | 1,239526111 |
| XM_006530035.3 | 0,906970325 |
| XM_006530048.3 | 0,905209769 |
| XM_006530053.2 | 0,831389465 |
| XM_006530114.3 | 0,938105127 |
| XM_006530170.3 | 0,712619541 |
| XM_006530180.1 | 0,997667358 |
| XM_006530207.3 | 1,122375777 |
| XM_006530215.3 | 1,282715174 |
| XM_006530227.1 | 1,21145322  |
| XM_006530275.3 | 1,130689672 |
| XM_006530284.3 | 0,38798175  |
| XM_006530292.3 | 0,5205221   |
| XM_006530427.3 | 1,033414397 |
| XM_006530436.3 | 1,496501037 |
| XM_006530503.3 | 0,961813687 |
| XM_006530504.1 | 0,598600415 |
| XM_006530515.3 | 0,607774367 |
| XM_006530559.2 | 0,997667358 |
| XM_006530560.1 | 0,872958938 |
| XM_006530571.3 | 0,731622729 |
| XM_006530578.2 | 0,675839178 |
| XM_006530650.3 | 0,833494248 |
| XM_006530673.3 | 1,264648763 |
| XM_006530766.3 | 1,122375777 |
| XM_006530768.3 | 1,551927001 |
| XM_006530771.3 | 0,684446211 |
| XM_006530784.3 | 0,950159388 |
| XM_006530812.3 | 1,21145322  |
| XM_006530828.3 | 1,122375777 |
| XM_006530840.2 | 0,345346393 |
| XM_006530851.3 | 0,718320498 |
| XM_006530878.1 | 0,36278813  |
| XM_006530883.3 | 1,168696048 |
| XM_006530957.3 | 0,928862712 |
| XM_006530970.2 | 0,838947551 |
| XM_006530977.3 | 1,381385572 |
| XM_006530983.2 | 0,453485163 |
| XM_006531018.3 | 1,133712906 |
| XM_006531020.3 | 0,960496443 |
| XM_006531084.3 | 1,0624638   |
| XM_006531160.2 | 1,190523528 |
| XM_006531200.3 | 0,613949143 |
| XM_006531219.3 | 1,795801244 |
| XM_006531226.3 | 1,201735681 |



|                |             |
|----------------|-------------|
| XM_006531242.3 | 0,472579275 |
| XM_006531277.3 | 0,943739392 |
| XM_006531291.3 | 1,062821144 |
| XM_006531315.3 | 0,680227744 |
| XM_006531324.3 | 0,858287359 |
| XM_006531330.1 | 1,043015874 |
| XM_006531337.3 | 1,043015874 |
| XM_006531442.2 | 0,36278813  |
| XM_006531461.3 | 0,944927233 |
| XM_006531462.3 | 1,662778929 |
| XM_006531477.2 | 0,532089257 |
| XM_006531491.2 | 0,463202702 |
| XM_006531513.3 | 0,69836715  |
| XM_006531533.2 | 1,425239082 |
| XM_006531565.3 | 0,855143449 |
| XM_006531610.3 | 1,080806304 |
| XM_006531622.3 | 1,496501037 |
| XM_006531631.3 | 1,710286899 |
| XM_006531674.2 | 0,38798175  |
| XM_006531684.3 | 0,803676483 |
| XM_006531722.3 | 0,692258983 |
| XM_006531753.3 | 0,886815429 |
| XM_006531776.3 | 1,247084197 |
| XM_006531777.1 | 0,997667358 |
| XM_006531778.3 | 2,042842685 |
| XM_006531786.3 | 1,696034508 |
| XM_006531787.3 | 0,816273293 |
| XM_006531918.3 | 1,417737824 |
| XM_006531932.3 | 2,161612608 |
| XM_006531966.3 | 0,80915463  |
| XM_006531982.3 | 0,94778399  |
| XM_006531986.2 | 0,914528411 |
| XM_006531987.2 | 0,332555786 |
| XM_006532030.3 | 0,770924776 |
| XM_006532031.3 | 1,330223144 |
| XM_006532036.3 | 1,296967565 |
| XM_006532041.3 | 1,119334109 |
| XM_006532057.3 | 0,704235782 |
| XM_006532059.3 | 1,247084197 |
| XM_006532095.3 | 1,167082569 |
| XM_006532120.2 | 1,282715174 |
| XM_006532125.2 | 0,272091098 |
| XM_006532130.3 | 0,748250518 |
| XM_006532137.3 | 1,45115252  |
| XM_006532157.3 | 0,997667358 |
| XM_006532160.3 | 0,598600415 |
| XM_006532161.3 | 1,094215812 |
| XM_006532162.3 | 0,980466196 |
| XM_006532169.3 | 0,997667358 |
| XM_006532229.2 | 1,247084197 |
| XM_006532284.3 | 2,42290644  |
| XM_006532292.3 | 0,872958938 |
| XM_006532335.3 | 1,227898286 |
| XM_006532383.2 | 0,410804206 |
| XM_006532397.3 | 2,549594359 |
| XM_006532398.3 | 0,897900622 |

|                |             |
|----------------|-------------|
| XM_006532399.2 | 1,360455488 |
| XM_006532400.3 | 1,046334058 |
| XM_006532403.2 | 0,986330229 |
| XM_006532406.3 | 0,570095633 |
| XM_006532410.3 | 1,375163115 |
| XM_006532429.3 | 0,589530711 |
| XM_006532455.3 | 5,320892574 |
| XM_006532481.3 | 1,995334715 |
| XM_006532497.2 | 1,163945251 |
| XM_006532542.3 | 0,249416839 |
| XM_006532549.3 | 0,511624286 |
| XM_006532654.1 | 1,11367519  |
| XM_006532692.2 | 1,179061423 |
| XM_006532714.3 | 1,115039988 |
| XM_006532717.2 | 1,133712906 |
| XM_006532721.1 | 0,166277893 |
| XM_006532738.3 | 0,737406308 |
| XM_006532759.3 | 0,780783149 |
| XM_006532765.3 | 1,028844463 |
| XM_006532825.3 | 0,816273293 |
| XM_006532869.3 | 1,496501037 |
| XM_006532878.3 | 1,371792617 |
| XM_006532887.3 | 2,993002073 |
| XM_006532889.1 | 2,161612608 |
| XM_006532976.2 | 0,831389465 |
| XM_006533112.3 | 0,199533472 |
| XM_006533143.3 | 1,097434093 |
| XM_006533150.3 | 0,554259643 |
| XM_006533151.3 | 2,120043135 |
| XM_006533157.3 | 1,446617669 |
| XM_006533229.3 | 1,179061423 |
| XM_006533235.3 | 0,488331917 |
| XM_006533244.3 | 1,918591072 |
| XM_006533265.3 | 0,920923715 |
| XM_006533274.1 | 1,029850176 |
| XM_006533347.1 | 0,962036381 |
| XM_006533414.3 | 1,042088167 |
| XM_006533421.2 | 1,419757394 |
| XM_006533436.1 | 1,084876043 |
| XM_006533467.1 | 0,756473051 |
| XM_006533482.2 | 1,282715174 |
| XM_006533514.3 | 1,04233903  |
| XM_006533584.3 | 0,857056522 |
| XM_006533589.2 | 0,783881495 |
| XM_006533626.2 | 1,795801244 |
| XM_006533714.1 | 0,577596891 |
| XM_006533715.2 | 1,458129215 |
| XM_006533729.3 | 1,130689672 |
| XM_006533742.1 | 0,979461749 |
| XM_006533744.1 | 0,63739859  |
| XM_006533808.3 | 0,72557626  |
| XM_006533811.3 | 0,498833679 |
| XM_006533814.3 | 0,859758171 |
| XM_006533927.3 | 1,247084197 |
| XM_006533939.3 | 0,61081675  |
| XM_006533943.3 | 1,219371215 |

|                |             |
|----------------|-------------|
| XM_006533964.3 | 0,969162576 |
| XM_006533982.2 | 0,634879228 |
| XM_006533988.2 | 0,230230929 |
| XM_006533995.3 | 1,353977128 |
| XM_006534005.3 | 0,469831721 |
| XM_006534034.1 | 0,69836715  |
| XM_006534035.1 | 0,990641531 |
| XM_006534037.3 | 1,282715174 |
| XM_006534038.2 | 1,047419798 |
| XM_006534047.3 | 1,021421342 |
| XM_006534054.2 | 0,980564489 |
| XM_006534057.3 | 2,120043135 |
| XM_006534063.3 | 0,427571725 |
| XM_006534084.2 | 0,798133886 |
| XM_006534085.1 | 1,118596734 |
| XM_006534103.3 | 0,682614508 |
| XM_006534113.3 | 1,496501037 |
| XM_006534205.3 | 0,748250518 |
| XM_006534231.3 | 0,89446039  |
| XM_006534254.1 | 1,035433945 |
| XM_006534256.1 | 1,995334715 |
| XM_006534262.3 | 1,723243618 |
| XM_006534298.3 | 0,64365636  |
| XM_006534303.2 | 1,21145322  |
| XM_006534333.3 | 1,674655922 |
| XM_006534336.2 | 0,867063631 |
| XM_006534337.2 | 1,558855246 |
| XM_006534338.2 | 0,984710639 |
| XM_006534360.2 | 1,330223144 |
| XM_006534380.3 | 0,872958938 |
| XM_006534399.3 | 0,665111572 |
| XM_006534408.3 | 0,842186731 |
| XM_006534410.3 | 0,829230012 |
| XM_006534450.3 | 1,339724737 |
| XM_006534504.1 | 0,900929778 |
| XM_006534517.2 | 0,521856772 |
| XM_006534522.3 | 1,130689672 |
| XM_006534529.2 | 0,812914143 |
| XM_006534540.1 | 1,048829786 |
| XM_006534564.3 | 2,344518291 |
| XM_006534567.2 | 0,942241393 |
| XM_006534579.2 | 0,892649741 |
| XM_006534735.3 | 0,691297067 |
| XM_006534762.2 | 0,4655781   |
| XM_006534778.3 | 0,997667358 |
| XM_006534788.3 | 0,886815429 |
| XM_006534846.3 | 0,986066574 |
| XM_006534852.2 | 0,897900622 |
| XM_006534875.3 | 1,496501037 |
| XM_006534891.3 | 0,906970325 |
| XM_006534939.2 | 0,641357587 |
| XM_006535160.3 | 0,704235782 |
| XM_006535162.1 | 0,166277893 |
| XM_006535208.2 | 0,810604728 |
| XM_006535256.3 | 1,41049523  |
| XM_006535375.3 | 0,573128057 |

|                |             |
|----------------|-------------|
| XM_006535409.3 | 0,729064608 |
| XM_006535459.1 | 0,410804206 |
| XM_006535503.3 | 0,5372055   |
| XM_006535583.2 | 0,36278813  |
| XM_006535626.2 | 0,959781255 |
| XM_006535707.3 | 0,914528411 |
| XM_006535737.3 | 0,879300044 |
| XM_006535758.3 | 0,987053875 |
| XM_006535771.3 | 0,680947562 |
| XM_006535785.3 | 1,224409939 |
| XM_006535797.3 | 1,282715174 |
| XM_006535812.1 | 1,45115252  |
| XM_006535822.2 | 1,829056822 |
| XM_006535833.3 | 0,521235444 |
| XM_006536224.3 | 0,864645043 |
| XM_006536229.1 | 1,219371215 |
| XM_006536232.1 | 0,720537536 |
| XM_006536267.3 | 0,94778399  |
| XM_006537531.3 | 2,394401658 |
| XM_006537557.1 | 0,844180072 |
| XM_006537596.3 | 1,140191266 |
| XM_006537619.2 | 0,748250518 |
| XM_006537785.3 | 0,153487286 |
| XM_006537808.2 | 0,897900622 |
| XM_006537847.3 | 1,032444433 |
| XM_006537851.3 | 0,234745261 |
| XM_006537875.2 | 0,942241393 |
| XM_006537885.3 | 1,108519286 |
| XM_006537892.3 | 1,205514724 |
| XM_006537963.3 | 1,140191266 |
| XM_006538034.3 | 1,185633671 |
| XM_006538042.3 | 1,012463272 |
| XM_006538068.3 | 1,183279889 |
| XM_006538070.3 | 0,997667358 |
| XM_006538173.3 | 0,757265585 |
| XM_006538194.3 | 1,674655922 |
| XM_006538197.2 | 0,997667358 |
| XM_006538203.3 | 0,349183575 |
| XM_006538295.3 | 1,022000708 |
| XM_006538319.3 | 0,641357587 |
| XM_006538357.3 | 0,498833679 |
| XM_006538423.3 | 1,001921803 |
| XM_006538459.3 | 1,173726303 |
| XM_006538462.3 | 1,03555346  |
| XM_006538517.1 | 0,886815429 |
| XM_006538541.3 | 1,133712906 |
| XM_006538568.3 | 1,117387441 |
| XM_006538609.3 | 0,880294727 |
| XM_006538618.3 | 0,665111572 |
| XM_006538628.3 | 0,742943777 |
| XM_006538679.3 | 0,929644583 |
| XM_006538686.3 | 2,394401658 |
| XM_006538693.3 | 2,327890501 |
| XM_006538698.3 | 1,097434093 |
| XM_006538733.3 | 0,682614508 |
| XM_006538741.3 | 0,544182195 |

|                |             |
|----------------|-------------|
| XM_006538742.1 | 1,247084197 |
| XM_006538747.3 | 1,287530171 |
| XM_006538825.2 | 0,873605096 |
| XM_006538847.1 | 0,838276715 |
| XM_006538917.3 | 0,675839178 |
| XM_006538953.3 | 1,723243618 |
| XM_006539036.1 | 1,122375777 |
| XM_006539082.3 | 0,742450127 |
| XM_006539098.3 | 0,4655781   |
| XM_006539104.2 | 0,886815429 |
| XM_006539105.3 | 0,781305762 |
| XM_006539112.2 | 1,046334058 |
| XM_006539134.3 | 1,330223144 |
| XM_006539144.2 | 1,140191266 |
| XM_006539147.3 | 0,897900622 |
| XM_006539195.2 | 0,997667358 |
| XM_006539197.2 | 0,997667358 |
| XM_006539198.2 | 0,460461857 |
| XM_006539200.2 | 1,330223144 |
| XM_006539249.3 | 1,795801244 |
| XM_006539258.2 | 1,621209456 |
| XM_006539279.3 | 0,904136043 |
| XM_006539327.3 | 0,718320498 |
| XM_006539351.2 | 0,598600415 |
| XM_006539477.1 | 0,856820201 |
| XM_006539478.1 | 1,230456408 |
| XM_006539480.1 | 1,140191266 |
| XM_006539481.3 | 1,260211399 |
| XM_006539483.1 | 1,022000708 |
| XM_006539486.3 | 2,194868187 |
| XM_006539488.2 | 1,995334715 |
| XM_006539503.3 | 0,634879228 |
| XM_006539534.1 | 1,151154643 |
| XM_006539545.3 | 0,763646619 |
| XM_006539565.3 | 0,952318841 |
| XM_006539566.3 | 0,886126908 |
| XM_006539571.2 | 1,042640403 |
| XM_006539578.3 | 0,598600415 |
| XM_006539580.2 | 0,914528411 |
| XM_006539581.1 | 0,665111572 |
| XM_006539615.3 | 0,851667257 |
| XM_006539637.2 | 0,636808952 |
| XM_006539663.3 | 0,997667358 |
| XM_006539675.1 | 0,584839486 |
| XM_006539730.2 | 0,700285741 |
| XM_006539733.3 | 0,924539907 |
| XM_006539738.3 | 0,824159991 |
| XM_006539757.3 | 2,173489601 |
| XM_006539770.3 | 0,915385514 |
| XM_006539804.2 | 0,665111572 |
| XM_006539819.3 | 0,285047816 |
| XM_006539829.3 | 0,997667358 |
| XM_006539833.1 | 1,08836439  |
| XM_006539852.3 | 0,997667358 |
| XM_006539902.3 | 0,306974572 |
| XM_006539904.3 | 1,548104521 |

|                |             |
|----------------|-------------|
| XM_006539922.1 | 2,095101451 |
| XM_006539923.3 | 5,320892574 |
| XM_006539936.2 | 0,997667358 |
| XM_006539957.3 | 1,995334715 |
| XM_006540028.2 | 1,116791818 |
| XM_006540048.3 | 0,748250518 |
| XM_006540127.3 | 0,997667358 |
| XM_006540188.2 | 1,371792617 |
| XM_006540200.2 | 0,478880332 |
| XM_006540287.3 | 0,565344836 |
| XM_006540311.3 | 1,046334058 |
| XM_006540312.2 | 0,451325709 |
| XM_006540313.3 | 1,108519286 |
| XM_006540325.3 | 1,203069461 |
| XM_006540333.2 | 0,918542016 |
| XM_006540335.3 | 0,750625917 |
| XM_006540367.1 | 0,949000657 |
| XM_006540371.3 | 0,634879228 |
| XM_006540420.3 | 1,383861174 |
| XM_006540474.3 | 0,712619541 |
| XM_006540475.1 | 1,313595354 |
| XM_006540538.3 | 0,453485163 |
| XM_006540551.3 | 0,573128057 |
| XM_006540577.3 | 1,07643057  |
| XM_006540587.3 | 0,997667358 |
| XM_006540597.1 | 1,008940435 |
| XM_006540678.3 | 0,457264206 |
| XM_006540721.2 | 2,771298216 |
| XM_006540723.3 | 1,129434745 |
| XM_006540821.3 | 1,325259624 |
| XM_006540855.3 | 0,720537536 |
| XM_006540906.2 | 0,938981043 |
| XM_006540911.3 | 1,399712412 |
| XM_006540958.3 | 1,212219478 |
| XM_006540959.3 | 1,795801244 |
| XM_006540996.2 | 1,014295147 |
| XM_006541114.3 | 1,745917876 |
| XM_006541118.3 | 1,153147985 |
| XM_006541121.3 | 1,068929312 |
| XM_006541122.2 | 1,122375777 |
| XM_006541153.2 | 0,92154013  |
| XM_006541154.2 | 1,953765242 |
| XM_006541156.1 | 1,168983975 |
| XM_006541169.3 | 1,247084197 |
| XM_006541175.1 | 0,748250518 |
| XM_006541199.3 | 1,05522509  |
| XM_006541267.3 | 0,551342487 |
| XM_006541322.3 | 0,877947275 |
| XM_006541409.3 | 1,189526465 |
| XM_006541410.3 | 1,50810182  |
| XM_006541526.2 | 0,311771049 |
| XM_011238388.2 | 0,7759635   |
| XM_011238417.2 | 1,370422195 |
| XM_011238451.2 | 1,097434093 |
| XM_011238499.2 | 0,648483782 |
| XM_011238557.2 | 1,282715174 |

|                |             |
|----------------|-------------|
| XM_011238560.2 | 0,814422333 |
| XM_011238581.2 | 0,748250518 |
| XM_011238584.2 | 1,171503337 |
| XM_011238648.2 | 1,773630858 |
| XM_011238652.1 | 0,559298367 |
| XM_011238675.2 | 1,097434093 |
| XM_011238736.2 | 1,153552882 |
| XM_011238775.2 | 1,662778929 |
| XM_011238776.2 | 1,296967565 |
| XM_011238782.2 | 1,235207205 |
| XM_011238805.2 | 1,496501037 |
| XM_011238854.2 | 2,59393513  |
| XM_011238875.2 | 0,399066943 |
| XM_011238889.2 | 1,080806304 |
| XM_011238890.2 | 0,7759635   |
| XM_011238892.2 | 0,34205738  |
| XM_011238899.1 | 1,567762991 |
| XM_011238959.2 | 1,116655208 |
| XM_011238971.2 | 1,371792617 |
| XM_011238972.2 | 0,486043072 |
| XM_011238977.2 | 0,883648231 |
| XM_011238978.1 | 1,084421041 |
| XM_011238984.2 | #DIV/0!     |
| XM_011238987.2 | 0,902651419 |
| XM_011239001.1 | 1,08836439  |
| XM_011239076.2 | 0,585587362 |
| XM_011239090.2 | 0,748250518 |
| XM_011239155.2 | 1,08836439  |
| XM_011239158.2 | 0,834412699 |
| XM_011239194.2 | 3,741252591 |
| XM_011239219.2 | 1,036791568 |
| XM_011239283.2 | 0,783881495 |
| XM_011239312.2 | 0,803676483 |
| XM_011239359.2 | 1,365229016 |
| XM_011239370.2 | 1,745917876 |
| XM_011239397.2 | 0,18706263  |
| XM_011239423.2 | 0,844180072 |
| XM_011239452.2 | 0,798133886 |
| XM_011239478.1 | 0,756851099 |
| XM_011239518.2 | 1,60042472  |
| XM_011239519.2 | 1,710286899 |
| XM_011239525.2 | 3,990669431 |
| XM_011239602.2 | 1,546384404 |
| XM_011239604.2 | 0,997667358 |
| XM_011239606.1 | 1,104560289 |
| XM_011239608.1 | 1,223416906 |
| XM_011239619.2 | 1,371792617 |
| XM_011239623.1 | 1,041044199 |
| XM_011239636.1 | 0,272091098 |
| XM_011239661.2 | 1,147317461 |
| XM_011239706.2 | 0,835546412 |
| XM_011239719.2 | 0,80580825  |
| XM_011239745.1 | 0,798133886 |
| XM_011239786.2 | 0,748250518 |
| XM_011239802.2 | 1,567762991 |
| XM_011239810.2 | 2,660446287 |

|                |             |
|----------------|-------------|
| XM_011239843.2 | 1,155193783 |
| XM_011239877.1 | 0,997667358 |
| XM_011239899.1 | 0,944898175 |
| XM_011239920.2 | 0,874146637 |
| XM_011239985.2 | 0,38798175  |
| XM_011240004.1 | 0,704235782 |
| XM_011240013.2 | 0,694029466 |
| XM_011240027.2 | 0,325326312 |
| XM_011240056.2 | 1,074411001 |
| XM_011240078.2 | 1,155120446 |
| XM_011240094.2 | 0,726562097 |
| XM_011240129.2 | 0,798133886 |
| XM_011240157.2 | 0,399066943 |
| XM_011240199.2 | 0,91724537  |
| XM_011240242.2 | 1,45115252  |
| XM_011240261.2 | 0,5205221   |
| XM_011240318.2 | 2,194868187 |
| XM_011240380.1 | 0,732330294 |
| XM_011240381.1 | 3,990669431 |
| XM_011240385.1 | 0,383718214 |
| XM_011240424.2 | 1,084421041 |
| XM_011240469.2 | 0,997667358 |
| XM_011240582.1 | 0,997667358 |
| XM_011240586.1 | 0,249416839 |
| XM_011240592.2 | 1,272885939 |
| XM_011240628.2 | 0,623542099 |
| XM_011240649.2 | 0,945158549 |
| XM_011240699.2 | 0,712619541 |
| XM_011240713.1 | 0,742264514 |
| XM_011240733.2 | 1,995334715 |
| XM_011240766.1 | 0,764170742 |
| XM_011240780.1 | 2,494168394 |
| XM_011240796.2 | 0,812914143 |
| XM_011240845.2 | 1,153552882 |
| XM_011240880.2 | 1,710286899 |
| XM_011240887.2 | 1,304641929 |
| XM_011240904.1 | 0,821608412 |
| XM_011240905.2 | 0,756851099 |
| XM_011240971.2 | 0,886815429 |
| XM_011240976.2 | 1,45115252  |
| XM_011240977.2 | 0,399066943 |
| XM_011241012.2 | 1,795801244 |
| XM_011241013.2 | 0,997667358 |
| XM_011241014.2 | 0,882551893 |
| XM_011241025.2 | 0,872958938 |
| XM_011241060.2 | 1,140191266 |
| XM_011241062.2 | 0,906970325 |
| XM_011241070.2 | 1,128674182 |
| XM_011241224.2 | 1,371792617 |
| XM_011241225.2 | 1,219371215 |
| XM_011241258.2 | 1,120836167 |
| XM_011241263.1 | 0,923766072 |
| XM_011241277.2 | 0,767436429 |
| XM_011241282.1 | 1,090043965 |
| XM_011241290.2 | 0,997667358 |
| XM_011241300.2 | 1,247084197 |



|                |             |
|----------------|-------------|
| XM_011241368.2 | 0,690692786 |
| XM_011241370.2 | 1,396734301 |
| XM_011241461.2 | 1,224409939 |
| XM_011241476.1 | 1,266270108 |
| XM_011241490.2 | 0,952318841 |
| XM_011241573.1 | 1,097434093 |
| XM_011241583.2 | 1,08836439  |
| XM_011241731.2 | 0,589530711 |
| XM_011241737.1 | 0,997667358 |
| XM_011241753.2 | 0,142523908 |
| XM_011241765.1 | 0,851667257 |
| XM_011241782.2 | 0,783881495 |
| XM_011241797.2 | 0,670845292 |
| XM_011241836.2 | 0,7759635   |
| XM_011241882.2 | 1,122375777 |
| XM_011241886.2 | 1,126994608 |
| XM_011241895.2 | 1,795801244 |
| XM_011242042.2 | 0,967435014 |
| XM_011242050.1 | 1,045941585 |
| XM_011242057.2 | 0,729064608 |
| XM_011242070.2 | 3,192535545 |
| XM_011242104.2 | 1,251538069 |
| XM_011242152.2 | 0,906970325 |
| XM_011242156.2 | 1,425239082 |
| XM_011242163.1 | 1,83780829  |
| XM_011242214.1 | 0,498833679 |
| XM_011242228.2 | 0,641357587 |
| XM_011242260.2 | 1,662778929 |
| XM_011242264.2 | 0,60572661  |
| XM_011242265.2 | 0,761225961 |
| XM_011242298.1 | 1,551927001 |
| XM_011242299.1 | 0,906970325 |
| XM_011242305.2 | 1,404124429 |
| XM_011242314.2 | 0,5372055   |
| XM_011242316.2 | 0,979077283 |
| XM_011242323.1 | 1,227898286 |
| XM_011242352.2 | 1,710286899 |
| XM_011242353.2 | 0,593207618 |
| XM_011242367.1 | 0,642941186 |
| XM_011242368.1 | 1,064178515 |
| XM_011242370.2 | 0,285047816 |
| XM_011242391.2 | 1,086844328 |
| XM_011242411.1 | 0,748250518 |
| XM_011242444.2 | 0,607275783 |
| XM_011242468.2 | 1,173726303 |
| XM_011242471.2 | 0,926405404 |
| XM_011242560.2 | 1,122375777 |
| XM_011242569.2 | 1,140191266 |
| XM_011242600.1 | 0,36278813  |
| XM_011242622.2 | 1,662778929 |
| XM_011242631.2 | 1,596267772 |
| XM_011242639.1 | 1,155193783 |
| XM_011242654.1 | 0,378425549 |
| XM_011242660.1 | 0,221703857 |
| XM_011242711.1 | 0,712619541 |
| XM_011242722.2 | 1,425239082 |

|                |             |
|----------------|-------------|
| XM_011242805.1 | 0,704235782 |
| XM_011242807.1 | 0,69836715  |
| XM_011242881.2 | 1,381385572 |
| XM_011242891.2 | 0,532089257 |
| XM_011242894.2 | 1,029339337 |
| XM_011242913.1 | 0,377495757 |
| XM_011242929.2 | 0,598600415 |
| XM_011242940.2 | 1,795801244 |
| XM_011242950.2 | 1,596267772 |
| XM_011242970.1 | 1,079294687 |
| XM_011242976.2 | 1,179061423 |
| XM_011242992.2 | 1,675328204 |
| XM_011243022.2 | 0,570095633 |
| XM_011243142.2 | 0,748250518 |
| XM_011243202.1 | 1,0727606   |
| XM_011243207.2 | 0,947152555 |
| XM_011243262.2 | 0,821608412 |
| XM_011243401.1 | 0,942241393 |
| XM_011243443.2 | 1,396734301 |
| XM_011243444.2 | 1,093870996 |
| XM_011243456.2 | 2,448819878 |
| XM_011243507.2 | 0,789819991 |
| XM_011243516.2 | 3,990669431 |
| XM_011243560.2 | 0,951264225 |
| XM_011243573.2 | 1,168142557 |
| XM_011243603.2 | 1,330223144 |
| XM_011243612.2 | 0,882551893 |
| XM_011243614.2 | 0,696046994 |
| XM_011243615.1 | 1,08836439  |
| XM_011243722.2 | 0,648483782 |
| XM_011243744.1 | 1,151154643 |
| XM_011243747.2 | 0,708021996 |
| XM_011243750.2 | 0,427571725 |
| XM_011243865.2 | 0,877729205 |
| XM_011243882.1 | 0,665111572 |
| XM_011243884.2 | 0,541590851 |
| XM_011243892.2 | 0,855143449 |
| XM_011243895.1 | 0,80763548  |
| XM_011244079.2 | 0,534464656 |
| XM_011244145.2 | 0,960716715 |
| XM_011244151.1 | 0,18706263  |
| XM_011244154.2 | 0,598600415 |
| XM_011244161.2 | 1,257334204 |
| XM_011244185.2 | 0,682614508 |
| XM_011244236.1 | 0,886815429 |
| XM_011244243.2 | 0,958914989 |
| XM_011244246.1 | 0,872958938 |
| XM_011244284.2 | 0,931156201 |
| XM_011244318.2 | 2,120043135 |
| XM_011244369.2 | 1,995334715 |
| XM_011244373.2 | 0,997667358 |
| XM_011244411.2 | 0,685896308 |
| XM_011244428.2 | 0,94778399  |
| XM_011244429.2 | 1,003002477 |
| XM_011244518.2 | 0,681333805 |
| XM_011244532.1 | 0,806624672 |

|                |             |
|----------------|-------------|
| XM_011244544.2 | 0,876737981 |
| XM_011244555.2 | 1,00113148  |
| XM_011244565.2 | 1,298551164 |
| XM_011244576.2 | 1,496501037 |
| XM_011244594.2 | 0,79259129  |
| XM_011244606.2 | 2,743585234 |
| XM_011244637.1 | 0,36278813  |
| XM_011244707.2 | 0,665111572 |
| XM_011244741.2 | 4,323225217 |
| XM_011244882.2 | 1,140191266 |
| XM_011244932.2 | 0,525088083 |
| XM_011244952.2 | 1,520255021 |
| XM_011245001.2 | 0,890639716 |
| XM_011245038.2 | 1,172583063 |
| XM_011245039.1 | 1,330223144 |
| XM_011245071.2 | 1,077480746 |
| XM_011245122.2 | 0,374125259 |
| XM_011245123.2 | 0,272091098 |
| XM_011245154.1 | 1,795801244 |
| XM_011245156.2 | 4,323225217 |
| XM_011245161.2 | 1,136232268 |
| XM_011245171.1 | 1,441075072 |
| XM_011245175.2 | 0,7759635   |
| XM_011245176.2 | 1,045175327 |
| XM_011245204.2 | 1,00931328  |
| XM_011245207.2 | 0,913653264 |
| XM_011245382.1 | 0,682614508 |
| XM_011245387.2 | 0,70918523  |
| XM_011245401.1 | 1,051305388 |
| XM_011245456.2 | 1,773630858 |
| XM_011245517.2 | 0,680227744 |
| XM_011245519.2 | 0,882551893 |
| XM_011245520.1 | 0,665111572 |
| XM_011245523.1 | 0,864645043 |
| XM_011245537.2 | 1,102684974 |
| XM_011245559.1 | 0,978105253 |
| XM_011245585.2 | 1,092468328 |
| XM_011245643.2 | 0,840140933 |
| XM_011245688.2 | 1,108519286 |
| XM_011245692.2 | 1,330223144 |
| XM_011245694.1 | 1,080371672 |
| XM_011245713.2 | 1,133712906 |
| XM_011245728.1 | 2,05076068  |
| XM_011245737.1 | 1,496501037 |
| XM_011245784.2 | 1,696034508 |
| XM_011245785.2 | 0,5205221   |
| XM_011245949.2 | 1,219371215 |
| XM_011245976.2 | 1,330223144 |
| XM_011245991.1 | 0,817760129 |
| XM_011245996.2 | 0,443407715 |
| XM_011246002.2 | 0,332555786 |
| XM_011246047.2 | 0,904136043 |
| XM_011246050.1 | 0,886815429 |
| XM_011246052.2 | 0,997667358 |
| XM_011246094.2 | 0,665111572 |
| XM_011246113.2 | 0,383718214 |

|                |             |
|----------------|-------------|
| XM_011246177.2 | 0,816273293 |
| XM_011246211.1 | 1,184729987 |
| XM_011246219.2 | 1,063344519 |
| XM_011246229.2 | 1,995334715 |
| XM_011246257.2 | 1,097434093 |
| XM_011246313.2 | 1,396734301 |
| XM_011246337.2 | 1,020341616 |
| XM_011246346.2 | 0,997667358 |
| XM_011246355.2 | 1,282715174 |
| XM_011246362.2 | 1,171174724 |
| XM_011246415.2 | 1,496501037 |
| XM_011246424.2 | 0,906970325 |
| XM_011246425.2 | 1,153147985 |
| XM_011246454.2 | 0,477145258 |
| XM_011246472.2 | 0,448950311 |
| XM_011246473.2 | 0,748250518 |
| XM_011246551.2 | 1,089602575 |
| XM_011246567.2 | 1,192613853 |
| XM_011246569.2 | 1,330223144 |
| XM_011246586.2 | 0,897900622 |
| XM_011246639.2 | 0,598600415 |
| XM_011246678.1 | 1,525844194 |
| XM_011246689.1 | 1,160807932 |
| XM_011246704.2 | 1,11529626  |
| XM_011246742.2 | 0,779427623 |
| XM_011246779.1 | 0,612204969 |
| XM_011246799.1 | 0,872958938 |
| XM_011246802.2 | 1,108519286 |
| XM_011246853.1 | 0,471120697 |
| XM_011246860.2 | 0,142523908 |
| XM_011246895.2 | 1,068929312 |
| XM_011246899.2 | 1,134602093 |
| XM_011246914.2 | 1,163945251 |
| XM_011246932.2 | 0,997667358 |
| XM_011246968.2 | 6,318559932 |
| XM_011246974.2 | 0,564157137 |
| XM_011246989.1 | 0,951479054 |
| XM_011246994.2 | 0,919724595 |
| XM_011246998.1 | 1,170694538 |
| XM_011247048.2 | 0,36278813  |
| XM_011247065.1 | 0,694029466 |
| XM_011247083.2 | 1,108519286 |
| XM_011247094.2 | 0,943739392 |
| XM_011247110.2 | 0,855143449 |
| XM_011247129.2 | 1,047550726 |
| XM_011247141.1 | 1,425239082 |
| XM_011247157.1 | 1,745917876 |
| XM_011247225.2 | 1,788920779 |
| XM_011247240.2 | 0,886815429 |
| XM_011247325.2 | 1,636174467 |
| XM_011247326.2 | 1,567762991 |
| XM_011247345.2 | 0,817855218 |
| XM_011247369.1 | 0,892649741 |
| XM_011247382.2 | 0,897900622 |
| XM_011247386.2 | 1,330223144 |
| XM_011247417.2 | 1,157294135 |

|                |             |
|----------------|-------------|
| XM_011247442.1 | 0,688865556 |
| XM_011247496.2 | 0,872958938 |
| XM_011247523.1 | 0,581972625 |
| XM_011247527.2 | 0,946063874 |
| XM_011247553.2 | 0,920923715 |
| XM_011247646.2 | 0,962036381 |
| XM_011247662.1 | 1,282715174 |
| XM_011247670.2 | 0,690692786 |
| XM_011247682.2 | 3,658113645 |
| XM_011247694.2 | 1,463245458 |
| XM_011247771.1 | 0,778667206 |
| XM_011247793.2 | 0,7759635   |
| XM_011247878.2 | 0,997667358 |
| XM_011247894.2 | 1,783708306 |
| XM_011247895.2 | 1,167483078 |
| XM_011247923.2 | 0,706681045 |
| XM_011247950.2 | 1,014295147 |
| XM_011247967.2 | 1,632546585 |
| XM_011248191.2 | 1,074411001 |
| XM_011248240.2 | 1,122375777 |
| XM_011248289.2 | 0,613949143 |
| XM_011248299.1 | 1,184729987 |
| XM_011248311.2 | 1,163945251 |
| XM_011248388.2 | 0,55869372  |
| XM_011248420.1 | 3,146489359 |
| XM_011248421.1 | 1,324489423 |
| XM_011248436.2 | 0,872958938 |
| XM_011248491.1 | 1,489849921 |
| XM_011248496.2 | 0,731622729 |
| XM_011248497.2 | 0,272091098 |
| XM_011248564.2 | 0,761107056 |
| XM_011248612.2 | 0,913653264 |
| XM_011248613.2 | 0,932836988 |
| XM_011248615.1 | 1,029850176 |
| XM_011248659.2 | 1,567762991 |
| XM_011248672.2 | 0,860058067 |
| XM_011248708.2 | 0,89222284  |
| XM_011248757.2 | 0,816273293 |
| XM_011248764.2 | 0,427571725 |
| XM_011248780.2 | 1,710286899 |
| XM_011248790.1 | 0,926405404 |
| XM_011248805.2 | 0,997667358 |
| XM_011248817.2 | 1,080806304 |
| XM_011248835.2 | 0,982103962 |
| XM_011248845.2 | 1,183279889 |
| XM_011248848.1 | 0,841170517 |
| XM_011248860.1 | 1,330223144 |
| XM_011248874.2 | 0,717423718 |
| XM_011248906.2 | 0,922086497 |
| XM_011248921.1 | 1,08836439  |
| XM_011248922.2 | 1,312720207 |
| XM_011248923.1 | 1,534872858 |
| XM_011248932.2 | 0,963265035 |
| XM_011248961.2 | 0,627105196 |
| XM_011248965.2 | 1,441075072 |
| XM_011248969.1 | 1,219371215 |

|                |             |
|----------------|-------------|
| XM_011249000.1 | 0,199533472 |
| XM_011249004.1 | 0,789819991 |
| XM_011249012.1 | 1,467157879 |
| XM_011249037.2 | 0,824564626 |
| XM_011249073.2 | 0,899150109 |
| XM_011249084.2 | 1,616221119 |
| XM_011249086.2 | 1,870626296 |
| XM_011249096.2 | 1,579639983 |
| XM_011249133.1 | 1,683563666 |
| XM_011249173.2 | 0,997667358 |
| XM_011249178.2 | 0,593207618 |
| XM_011249187.1 | 0,737557096 |
| XM_011249189.2 | 1,470246632 |
| XM_011249191.2 | 0,772387632 |
| XM_011249205.1 | 5,237753628 |
| XM_011249216.2 | 0,591210286 |
| XM_011249223.2 | 1,011028974 |
| XM_011249229.2 | 1,504955845 |
| XM_011249276.2 | 0,391242101 |
| XM_011249309.2 | 0,498833679 |
| XM_011249316.2 | 1,232412618 |
| XM_011249334.2 | 1,092183213 |
| XM_011249335.2 | 0,460461857 |
| XM_011249367.1 | 0,266044629 |
| XM_011249375.2 | 1,163945251 |
| XM_011249399.2 | 0,910913674 |
| XM_011249431.2 | 0,682614508 |
| XM_011249432.1 | 0,690692786 |
| XM_011249508.2 | 0,656394513 |
| XM_011249578.2 | 1,662778929 |
| XM_011249595.2 | 1,995334715 |
| XM_011249610.2 | 0,815553475 |
| XM_011249655.2 | 0,475079694 |
| XM_011249683.1 | 0,577596891 |
| XM_011249764.2 | 0,712619541 |
| XM_011249800.1 | 0,46846989  |
| XM_011249801.2 | 0,408136646 |
| XM_011249806.2 | 0,374125259 |
| XM_011249855.2 | 1,177141909 |
| XM_011249865.1 | 0,748250518 |
| XM_011249869.1 | 0,974542618 |
| XM_011249870.2 | 0,961715381 |
| XM_011249943.2 | 0,672845427 |
| XM_011249971.2 | 0,469490521 |
| XM_011250057.2 | 1,197200829 |
| XM_011250065.2 | 0,962036381 |
| XM_011250078.2 | 1,060021568 |
| XM_011250089.2 | 1,345690855 |
| XM_011250139.2 | 1,163945251 |
| XM_011250172.1 | 2,267425813 |
| XM_011250178.1 | 0,54221052  |
| XM_011250188.1 | 2,743585234 |
| XM_011250200.2 | 1,621209456 |
| XM_011250219.2 | 1,130689672 |
| XM_011250220.2 | 1,201272941 |
| XM_011250230.2 | 0,505859505 |

|                |             |
|----------------|-------------|
| XM_011250232.2 | 0,272091098 |
| XM_011250234.2 | 1,330223144 |
| XM_011250239.2 | 1,140191266 |
| XM_011250332.2 | 0,997667358 |
| XM_011250412.2 | 2,171393661 |
| XM_011250418.1 | 1,008877103 |
| XM_011250419.2 | 2,494168394 |
| XM_011250420.1 | 0,751329738 |
| XM_011250435.1 | 1,122375777 |
| XM_011250460.2 | 0,665111572 |
| XM_011250576.2 | 1,496501037 |
| XM_011250582.2 | 0,735578296 |
| XM_011250673.2 | 1,011149349 |
| XM_011250686.1 | 1,053093322 |
| XM_011250687.2 | 0,620171601 |
| XM_011250740.2 | 0,399066943 |
| XM_011250741.2 | 1,095798573 |
| XM_011250779.2 | 0,619241808 |
| XM_011250816.2 | 1,022114282 |
| XM_011250820.2 | 1,054676921 |
| XM_011250823.1 | 1,496501037 |
| XM_011250824.1 | 0,992800688 |
| XM_011250898.2 | 0,838618938 |
| XM_011250909.2 | 2,225565644 |
| XM_011250970.1 | 1,117387441 |
| XM_011250978.2 | 1,02672563  |
| XM_017312219.1 | 0,636808952 |
| XM_017312227.1 | 1,099199876 |
| XM_017312236.1 | 1,330223144 |
| XM_017312289.1 | 1,067191215 |
| XM_017312339.1 | 1,257928408 |
| XM_017312343.1 | 1,219371215 |
| XM_017312344.1 | 1,995334715 |
| XM_017312364.1 | 1,084421041 |
| XM_017312384.1 | 1,385649108 |
| XM_017312409.1 | 0,544182195 |
| XM_017312420.1 | 1,496501037 |
| XM_017312457.1 | 0,720537536 |
| XM_017312468.1 | 0,997667358 |
| XM_017312470.1 | 0,883648231 |
| XM_017312474.1 | 0,589530711 |
| XM_017312477.1 | 1,223330212 |
| XM_017312494.1 | 1,282715174 |
| XM_017312540.1 | 0,831389465 |
| XM_017312542.1 | 1,247084197 |
| XM_017312547.1 | 0,303637891 |
| XM_017312553.1 | 2,294634923 |
| XM_017312555.1 | 1,179061423 |
| XM_017312569.1 | 0,447230195 |
| XM_017312570.1 | 0,586863152 |
| XM_017312576.1 | 0,510434462 |
| XM_017312580.1 | 1,579639983 |
| XM_017312644.1 | 1,282715174 |
| XM_017312664.1 | 0,80457045  |
| XM_017312665.1 | 0,883351306 |
| XM_017312723.1 | 0,94860175  |

|                |             |
|----------------|-------------|
| XM_017312853.1 | 0,581972625 |
| XM_017312924.1 | 0,923766072 |
| XM_017312928.1 | 1,095883315 |
| XM_017312945.1 | 0,945158549 |
| XM_017312947.1 | 0,810604728 |
| XM_017312962.1 | 0,764616453 |
| XM_017312966.1 | 1,330223144 |
| XM_017312991.1 | 0,960716715 |
| XM_017312999.1 | 0,783881495 |
| XM_017313012.1 | 0,665111572 |
| XM_017313039.1 | 1,190764266 |
| XM_017313043.1 | 0,819512472 |
| XM_017313046.1 | 1,995334715 |
| XM_017313048.1 | 0,872958938 |
| XM_017313049.1 | 0,532089257 |
| XM_017313051.1 | 0,613949143 |
| XM_017313054.1 | 1,308052758 |
| XM_017313060.1 | 0,981575949 |
| XM_017313069.1 | 1,105523288 |
| XM_017313070.1 | 0,997667358 |
| XM_017313076.1 | 0,864645043 |
| XM_017313090.1 | 1,056353673 |
| XM_017313099.1 | 0,926405404 |
| XM_017313110.1 | 0,831389465 |
| XM_017313115.1 | 1,054139095 |
| XM_017313118.1 | 0,712619541 |
| XM_017313136.1 | 0,748250518 |
| XM_017313210.1 | 0,759094729 |
| XM_017313238.1 | 1,139296015 |
| XM_017313250.1 | 0,460461857 |
| XM_017313254.1 | 0,345346393 |
| XM_017313297.1 | 0,933301722 |
| XM_017313339.1 | 1,371792617 |
| XM_017313349.1 | 1,06273262  |
| XM_017313401.1 | 2,37905293  |
| XM_017313405.1 | 0,305408375 |
| XM_017313427.1 | 0,689297447 |
| XM_017313484.1 | 0,665111572 |
| XM_017313491.1 | 0,89620966  |
| XM_017313494.1 | 1,710286899 |
| XM_017313508.1 | 2,244751555 |
| XM_017313511.1 | 0,69836715  |
| XM_017313516.1 | 0,855143449 |
| XM_017313541.1 | 0,997667358 |
| XM_017313550.1 | 1,662778929 |
| XM_017313556.1 | 1,396734301 |
| XM_017313558.1 | 1,130689672 |
| XM_017313587.1 | 0,589530711 |
| XM_017313610.1 | 0,777997481 |
| XM_017313666.1 | 0,704235782 |
| XM_017313683.1 | 2,327890501 |
| XM_017313694.1 | 0,98170468  |
| XM_017313697.1 | 0,937807316 |
| XM_017313700.1 | 0,930061632 |
| XM_017313704.1 | 1,074534185 |
| XM_017313705.1 | 1,273617903 |



|                |             |
|----------------|-------------|
| XM_017313713.1 | 0,096548454 |
| XM_017313738.1 | 0,997667358 |
| XM_017313739.1 | 1,179061423 |
| XM_017313741.1 | 0,758556999 |
| XM_017313747.1 | 2,494168394 |
| XM_017313765.1 | 0,406457072 |
| XM_017313791.1 | 1,266879184 |
| XM_017313813.1 | 1,214551566 |
| XM_017313822.1 | 0,997667358 |
| XM_017313824.1 | 1,097434093 |
| XM_017313831.1 | 0,851667257 |
| XM_017313846.1 | 0,760127511 |
| XM_017313854.1 | 1,463245458 |
| XM_017313860.1 | 1,829056822 |
| XM_017313894.1 | 1,344682091 |
| XM_017313911.1 | 2,161612608 |
| XM_017313914.1 | 0,997667358 |
| XM_017313965.1 | 0,897900622 |
| XM_017314049.1 | 0,882551893 |
| XM_017314052.1 | 0,641357587 |
| XM_017314053.1 | 0,902651419 |
| XM_017314056.1 | 2,106186644 |
| XM_017314066.1 | 1,381385572 |
| XM_017314069.1 | 0,591836568 |
| XM_017314074.1 | 0,872958938 |
| XM_017314075.1 | 1,330223144 |
| XM_017314102.1 | 2,161612608 |
| XM_017314112.1 | 0,736373526 |
| XM_017314170.1 | 0,694029466 |
| XM_017314206.1 | 1,068929312 |
| XM_017314228.1 | 0,752626252 |
| XM_017314230.1 | 0,588787293 |
| XM_017314232.1 | 0,831389465 |
| XM_017314256.1 | 0,076743643 |
| XM_017314307.1 | 0,736373526 |
| XM_017314310.1 | 0,997667358 |
| XM_017314314.1 | 0,735123316 |
| XM_017314315.1 | 1,120836167 |
| XM_017314316.1 | 0,952318841 |
| XM_017314363.1 | 1,07643057  |
| XM_017314403.1 | 1,795801244 |
| XM_017314421.1 | 0,7759635   |
| XM_017314424.1 | 0,792265255 |
| XM_017314428.1 | 0,938981043 |
| XM_017314431.1 | 0,902651419 |
| XM_017314433.1 | 1,662778929 |
| XM_017314460.1 | 0,415694732 |
| XM_017314462.1 | 0,901118904 |
| XM_017314499.1 | 1,056353673 |
| XM_017314500.1 | 1,189000824 |
| XM_017314503.1 | 0,875504008 |
| XM_017314564.1 | 2,660446287 |
| XM_017314569.1 | 0,848017254 |
| XM_017314579.1 | 0,741855215 |
| XM_017314587.1 | 0,603851295 |
| XM_017314589.1 | 1,020341616 |

|                |             |
|----------------|-------------|
| XM_017314590.1 | 1,044727139 |
| XM_017314631.1 | 0,748250518 |
| XM_017314713.1 | 1,080806304 |
| XM_017314717.1 | 0,653442948 |
| XM_017314731.1 | 0,910913674 |
| XM_017314749.1 | 0,997667358 |
| XM_017314756.1 | 1,241541601 |
| XM_017314771.1 | 1,163945251 |
| XM_017314780.1 | 0,665111572 |
| XM_017314796.1 | 1,795801244 |
| XM_017314815.1 | 0,712619541 |
| XM_017314816.1 | 0,554259643 |
| XM_017314840.1 | 0,864645043 |
| XM_017314849.1 | 0,4886534   |
| XM_017314865.1 | 0,818156276 |
| XM_017314872.1 | 1,239526111 |
| XM_017314880.1 | 0,463202702 |
| XM_017314881.1 | 0,997667358 |
| XM_017314884.1 | 0,561187889 |
| XM_017314926.1 | 0,938981043 |
| XM_017314928.1 | 1,829056822 |
| XM_017314935.1 | 1,710286899 |
| XM_017314967.1 | 1,621209456 |
| XM_017314996.1 | 1,632546585 |
| XM_017315020.1 | 0,886815429 |
| XM_017315069.1 | 0,650652625 |
| XM_017315088.1 | 1,625828287 |
| XM_017315118.1 | 0,855143449 |
| XM_017315181.1 | 0,914933967 |
| XM_017315182.1 | 0,938870661 |
| XM_017315214.1 | 1,271536828 |
| XM_017315233.1 | 0,427571725 |
| XM_017315242.1 | 0,886815429 |
| XM_017315280.1 | 0,320678794 |
| XM_017315285.1 | 0,69836715  |
| XM_017315289.1 | 0,712619541 |
| XM_017315291.1 | 0,332555786 |
| XM_017315294.1 | 1,055503147 |
| XM_017315298.1 | 0,876000607 |
| XM_017315330.1 | 0,530696354 |
| XM_017315339.1 | 1,122375777 |
| XM_017315358.1 | 1,995334715 |
| XM_017315373.1 | 1,231355207 |
| XM_017315418.1 | 0,617603602 |
| XM_017315463.1 | 0,665111572 |
| XM_017315509.1 | 2,194868187 |
| XM_017315511.1 | 0,665111572 |
| XM_017315518.1 | 1,253825193 |
| XM_017315524.1 | 0,861621809 |
| XM_017315540.1 | 0,957760663 |
| XM_017315563.1 | 1,589503926 |
| XM_017315575.1 | 0,740204814 |
| XM_017315577.1 | 1,266270108 |
| XM_017315589.1 | 0,332555786 |
| XM_017315592.1 | 0,902651419 |
| XM_017315593.1 | 0,919418937 |

|                |             |
|----------------|-------------|
| XM_017315601.1 | 1,522755441 |
| XM_017315667.1 | 1,227898286 |
| XM_017315671.1 | 1,140191266 |
| XM_017315674.1 | 0,715717887 |
| XM_017315701.1 | 0,910152677 |
| XM_017315731.1 | 1,122375777 |
| XM_017315807.1 | 1,056353673 |
| XM_017315844.1 | 0,680227744 |
| XM_017315922.1 | 1,371792617 |
| XM_017315941.1 | 1,004363112 |
| XM_017315952.1 | 0,453485163 |
| XM_017315954.1 | 1,371792617 |
| XM_017315962.1 | 1,338974612 |
| XM_017315965.1 | 0,72557626  |
| XM_017315978.1 | 0,934179435 |
| XM_017315990.1 | 0,780783149 |
| XM_017316008.1 | 1,108519286 |
| XM_017316015.1 | 1,053093322 |
| XM_017316026.1 | 1,271751797 |
| XM_017316058.1 | 1,115039988 |
| XM_017316085.1 | 0,859102447 |
| XM_017316115.1 | 0,970054422 |
| XM_017316168.1 | 1,099470149 |
| XM_017316180.1 | 1,08836439  |
| XM_017316206.1 | 0,741855215 |
| XM_017316231.1 | 1,795801244 |
| XM_017316243.1 | 1,108519286 |
| XM_017316252.1 | 2,743585234 |
| XM_017316277.1 | 0,753962354 |
| XM_017316278.1 | 0,634879228 |
| XM_017316327.1 | 0,997667358 |
| XM_017316356.1 | 0,647608636 |
| XM_017316357.1 | 0,419309469 |
| XM_017316492.1 | 0,544182195 |
| XM_017316502.1 | 1,529756615 |
| XM_017316520.1 | 1,496501037 |
| XM_017316534.1 | 0,997667358 |
| XM_017316544.1 | 0,926405404 |
| XM_017316556.1 | 0,798133886 |
| XM_017316565.1 | 1,222947084 |
| XM_017316614.1 | 1,341690584 |
| XM_017316699.1 | 0,157526425 |
| XM_017316739.1 | 1,011719011 |
| XM_017316753.1 | 0,776627284 |
| XM_017316773.1 | 1,114061883 |
| XM_017316806.1 | 0,709878697 |
| XM_017316813.1 | 1,051595323 |
| XM_017316815.1 | 1,282715174 |
| XM_017316818.1 | 0,855143449 |
| XM_017316835.1 | 1,496501037 |
| XM_017316853.1 | 1,241994058 |
| XM_017316855.1 | 0,924578174 |
| XM_017316857.1 | 0,748250518 |
| XM_017316864.1 | 1,133712906 |
| XM_017316882.1 | 1,062450952 |
| XM_017316901.1 | 2,394401658 |

|                |             |
|----------------|-------------|
| XM_017316919.1 | 0,652196784 |
| XM_017316973.1 | 0,665111572 |
| XM_017317024.1 | 0,997667358 |
| XM_017317032.1 | 0,415694732 |
| XM_017317114.1 | 1,381385572 |
| XM_017317160.1 | 1,022924759 |
| XM_017317177.1 | 0,838947551 |
| XM_017317187.1 | 0,360268768 |
| XM_017317193.1 | 1,065619933 |
| XM_017317201.1 | 1,140191266 |
| XM_017317202.1 | 0,71762038  |
| XM_017317246.1 | 0,720537536 |
| XM_017317247.1 | 0,997667358 |
| XM_017317250.1 | 0,938981043 |
| XM_017317260.1 | 0,609685607 |
| XM_017317293.1 | 1,496501037 |
| XM_017317318.1 | 0,94119562  |
| XM_017317323.1 | 1,371792617 |
| XM_017317348.1 | 0,36278813  |
| XM_017317352.1 | 0,665111572 |
| XM_017317362.1 | 1,197200829 |
| XM_017317396.1 | 2,743585234 |
| XM_017317406.1 | 1,050176166 |
| XM_017317442.1 | 0,781506097 |
| XM_017317457.1 | 0,848017254 |
| XM_017317474.1 | 0,904136043 |
| XM_017317530.1 | 0,997667358 |
| XM_017317565.1 | 0,997667358 |
| XM_017317577.1 | 1,662778929 |
| XM_017317583.1 | 0,704235782 |
| XM_017317610.1 | 0,230230929 |
| XM_017317612.1 | 0,878623659 |
| XM_017317618.1 | 2,302309287 |
| XM_017317643.1 | 0,748250518 |
| XM_017317650.1 | 0,544182195 |
| XM_017317662.1 | 1,330223144 |
| XM_017317683.1 | 1,163945251 |
| XM_017317698.1 | 1,360455488 |
| XM_017317733.1 | 1,034279004 |
| XM_017317735.1 | 0,947152555 |
| XM_017317745.1 | 0,527069547 |
| XM_017317759.1 | 0,586863152 |
| XM_017317770.1 | 0,712619541 |
| XM_017317774.1 | 0,433768416 |
| XM_017317803.1 | 0,840140933 |
| XM_017317842.1 | 1,151154643 |
| XM_017317893.1 | 0,940109626 |
| XM_017317897.1 | 0,893433455 |
| XM_017317911.1 | 0,997667358 |
| XM_017317953.1 | 0,767436429 |
| XM_017317972.1 | 1,272025881 |
| XM_017317979.1 | 0,586863152 |
| XM_017317991.1 | 0,528176836 |
| XM_017318020.1 | 0,851854436 |
| XM_017318021.1 | 0,878796353 |
| XM_017318027.1 | 0,975211822 |

|                |             |
|----------------|-------------|
| XM_017318028.1 | 1,523710146 |
| XM_017318042.1 | 1,632546585 |
| XM_017318044.1 | 0,901118904 |
| XM_017318061.1 | 1,058132046 |
| XM_017318078.1 | 0,883648231 |
| XM_017318079.1 | 0,665111572 |
| XM_017318106.1 | 0,997667358 |
| XM_017318107.1 | 1,710286899 |
| XM_017318142.1 | 0,498833679 |
| XM_017318148.1 | 0,706681045 |
| XM_017318182.1 | 0,438973637 |
| XM_017318266.1 | 1,365229016 |
| XM_017318300.1 | 2,120043135 |
| XM_017318305.1 | 0,78885326  |
| XM_017318427.1 | 0,997667358 |
| XM_017318474.1 | 0,872958938 |
| XM_017318519.1 | 0,712619541 |
| XM_017318626.1 | 1,163945251 |
| XM_017318627.1 | 0,73043503  |
| XM_017318653.1 | 0,997667358 |
| XM_017318677.1 | 1,884482787 |
| XM_017318721.1 | 1,662778929 |
| XM_017318844.1 | 0,383718214 |
| XM_017318941.1 | 1,050176166 |
| XM_017318949.1 | 0,786323494 |
| XM_017319033.1 | 1,256321858 |
| XM_017319060.1 | 0,872958938 |
| XM_017319106.1 | 0,748250518 |
| XM_017319108.1 | 0,613949143 |
| XM_017319154.1 | 1,140191266 |
| XM_017319155.1 | 0,953392179 |
| XM_017319164.1 | 0,68411476  |
| XM_017319167.1 | 0,94778399  |
| XM_017319170.1 | 1,255129902 |
| XM_017319174.1 | 0,793017643 |
| XM_017319178.1 | 0,76137772  |
| XM_017319179.1 | 0,872356482 |
| XM_017319189.1 | 0,977025964 |
| XM_017319191.1 | 1,316920912 |
| XM_017319202.1 | 0,199533472 |
| XM_017319215.1 | 2,394401658 |
| XM_017319227.1 | 0,897900622 |
| XM_017319242.1 | 0,628667102 |
| XM_017319248.1 | 0,897900622 |
| XM_017319250.1 | 1,171174724 |
| XM_017319252.1 | 0,581972625 |
| XM_017319287.1 | 0,857782781 |
| XM_017319316.1 | 0,935550839 |
| XM_017319353.1 | 0,498833679 |
| XM_017319356.1 | 0,5372055   |
| XM_017319363.1 | 1,184729987 |
| XM_017319364.1 | 0,895633196 |
| XM_017319366.1 | 0,759587647 |
| XM_017319389.1 | 0,748250518 |
| XM_017319390.1 | 0,367561658 |
| XM_017319394.1 | 0,498833679 |

|                |             |
|----------------|-------------|
| XM_017319423.1 | 0,7759635   |
| XM_017319424.1 | 0,748250518 |
| XM_017319475.1 | 1,140191266 |
| XM_017319510.1 | 0,997667358 |
| XM_017319519.1 | 0,498833679 |
| XM_017319521.1 | 1,330223144 |
| XM_017319523.1 | 1,068929312 |
| XM_017319524.1 | 0,828750133 |
| XM_017319529.1 | 0,816273293 |
| XM_017319564.1 | 0,83804058  |
| XM_017319570.1 | 0,249416839 |
| XM_017319575.1 | 6,484837825 |
| XM_017319607.1 | 0,798133886 |
| XM_017319646.1 | 1,392093987 |
| XM_017319670.1 | 0,383718214 |
| XM_017319677.1 | 0,797049465 |
| XM_017319701.1 | 0,720537536 |
| XM_017319707.1 | 0,896892877 |
| XM_017319711.1 | 0,997667358 |
| XM_017319715.1 | 1,227898286 |
| XM_017319732.1 | 0,872958938 |
| XM_017319747.1 | 1,122375777 |
| XM_017319768.1 | 0,916517381 |
| XM_017319770.1 | 1,247084197 |
| XM_017319778.1 | 1,496501037 |
| XM_017319840.1 | 0,5372055   |
| XM_017319862.1 | 0,498833679 |
| XM_017319881.1 | 1,829056822 |
| XM_017319886.1 | 1,330223144 |
| XM_017319925.1 | 0,810604728 |
| XM_017319926.1 | 0,498833679 |
| XM_017319941.1 | 1,269758455 |
| XM_017319942.1 | 1,430763265 |
| XM_017319953.1 | 1,193637732 |
| XM_017319984.1 | 1,11900528  |
| XM_017319995.1 | 0,974732476 |
| XM_017320027.1 | 1,239038493 |
| XM_017320034.1 | 1,086928174 |
| XM_017320035.1 | 0,997667358 |
| XM_017320086.1 | 0,770924776 |
| XM_017320095.1 | 0,855143449 |
| XM_017320113.1 | 0,810604728 |
| XM_017320185.1 | 1,096672515 |
| XM_017320194.1 | 0,332555786 |
| XM_017320202.1 | 0,554259643 |
| XM_017320226.1 | 0,72557626  |
| XM_017320235.1 | 1,172933245 |
| XM_017320283.1 | 1,735073666 |
| XM_017320305.1 | 0,272091098 |
| XM_017320309.1 | 2,868293653 |
| XM_017320312.1 | 1,036791568 |
| XM_017320328.1 | 0,850470534 |
| XM_017320332.1 | 0,695343916 |
| XM_017320333.1 | 0,942241393 |
| XM_017320349.1 | 1,21376859  |
| XM_017320353.1 | 0,769938939 |

|                |             |
|----------------|-------------|
| XM_017320363.1 | 0,453485163 |
| XM_017320381.1 | 0,598600415 |
| XM_017320391.1 | 1,307288262 |
| XM_017320410.1 | 2,244751555 |
| XM_017320451.1 | 0,690692786 |
| XM_017320488.1 | 1,81394065  |
| XM_017320495.1 | 0,997667358 |
| XM_017320496.1 | 0,855143449 |
| XM_017320504.1 | 0,166277893 |
| XM_017320559.1 | 0,703306098 |
| XM_017320560.1 | 0,775381382 |
| XM_017320574.1 | 0,973334007 |
| XM_017320583.1 | 1,272025881 |
| XM_017320601.1 | 0,997667358 |
| XM_017320619.1 | 0,498833679 |
| XM_017320629.1 | 1,191658233 |
| XM_017320636.1 | 1,068929312 |
| XM_017320653.1 | 1,304641929 |
| XM_017320704.1 | 1,097434093 |
| XM_017320730.1 | 0,997667358 |
| XM_017320764.1 | 0,771780409 |
| XM_017320788.1 | 0,731622729 |
| XM_017320790.1 | 0,886815429 |
| XM_017320794.1 | 0,427571725 |
| XM_017320800.1 | 1,21145322  |
| XM_017320828.1 | 0,816273293 |
| XM_017320832.1 | 0,36278813  |
| XM_017320875.1 | 0,997667358 |
| XM_017320905.1 | 0,997667358 |
| XM_017320924.1 | 0,554259643 |
| XM_017320978.1 | 1,179061423 |
| XM_017320990.1 | 0,498833679 |
| XM_017321066.1 | 0,604646883 |
| XM_017321067.1 | 1,028523049 |
| XM_017321077.1 | 0,780783149 |
| XM_017321085.1 | 0,573658731 |
| XM_017321095.1 | 0,910691229 |
| XM_017321096.1 | 0,798133886 |
| XM_017321112.1 | 0,931156201 |
| XM_017321122.1 | 0,352117891 |
| XM_017321124.1 | 0,861621809 |
| XM_017321193.1 | 0,976212146 |
| XM_017321199.1 | 0,712619541 |
| XM_017321211.1 | 0,374125259 |
| XM_017321229.1 | 1,053093322 |
| XM_017321255.1 | 0,85095157  |
| XM_017321262.1 | 1,132487271 |
| XM_017321263.1 | 1,109650428 |
| XM_017321373.1 | 0,712619541 |
| XM_017321374.1 | 1,995334715 |
| XM_017321402.1 | 1,602314241 |
| XM_017321404.1 | 0,962661485 |
| XM_017321441.1 | 1,260211399 |
| XM_017321462.1 | 1,047550726 |
| XM_017321471.1 | 0,4655781   |
| XM_017321519.1 | 0,427571725 |

|                |             |
|----------------|-------------|
| XM_017321577.1 | 0,872958938 |
| XM_017321601.1 | 0,914528411 |
| XM_017321608.1 | 0,997667358 |
| XM_017321621.1 | 1,662778929 |
| XM_017321672.1 | 0,881904268 |
| XM_017321686.1 | 0,153487286 |
| XM_017321694.1 | 0,665111572 |
| XM_017321699.1 | 1,870626296 |
| XM_017321713.1 | 1,163945251 |
| XM_017321732.1 | 0,935313148 |
| XM_017321762.1 | 1,370129838 |
| XM_017321793.1 | 0,978105253 |
| XM_017321834.1 | 1,314387154 |
| XM_017321863.1 | 1,884482787 |
| XM_017321868.1 | 0,954290516 |
| XM_017321874.1 | 1,306037268 |
| XM_017321876.1 | 0,868936086 |
| XM_017321877.1 | 1,258421326 |
| XM_017321883.1 | 0,51308607  |
| XM_017321889.1 | 1,385649108 |
| XM_017321915.1 | 0,249416839 |
| XM_017321927.1 | 1,360455488 |
| XM_017321928.1 | 0,997667358 |
| XM_017321934.1 | 0,166277893 |
| XM_017321962.1 | 0,714746764 |
| XM_017321965.1 | 0,848204083 |
| XM_017322003.1 | 0,665111572 |
| XM_017322023.1 | 0,798133886 |
| XM_017322049.1 | 0,634879228 |
| XM_017322067.1 | 0,311771049 |
| XM_017322086.1 | 0,391940748 |
| XM_017322124.1 | 0,849864786 |
| XM_017322126.1 | 0,665111572 |
| XM_017322144.1 | 0,787632124 |
| XM_017322145.1 | 1,092041297 |
| XM_017322158.1 | 1,168696048 |
| XM_017322211.1 | 1,007644031 |
| XM_017322212.1 | 1,829056822 |
| XM_017322235.1 | 0,596306926 |
| XM_017322318.1 | 0,771392287 |
| XM_017322333.1 | 0,876000607 |
| XM_017322348.1 | 0,897900622 |
| XM_017322352.1 | 1,159451254 |
| XM_017322378.1 | 0,736373526 |
| XM_485502.8    | 1,299990799 |
| XM_889722.8    | 0,638507109 |
| XM_889893.7    | 0,399066943 |
| XM_983271.5    | 1,107301133 |
| XM_992714.7    | 0,578357889 |
| XR_001587.4    | 0,230230929 |
| XR_001777993.1 | 1,263711986 |
| XR_001777995.1 | 1,584530509 |
| XR_001778007.1 | 0,498833679 |
| XR_001778017.1 | 0,997667358 |
| XR_001778019.1 | 1,183673136 |
| XR_001778020.1 | 0,498833679 |



|                |             |
|----------------|-------------|
| XR_001778029.1 | 1,365229016 |
| XR_001778034.1 | 1,151154643 |
| XR_001778056.1 | 0,926405404 |
| XR_001778069.1 | 0,789819991 |
| XR_001778072.1 | 0,868936086 |
| XR_001778073.1 | 1,353977128 |
| XR_001778075.1 | 1,122375777 |
| XR_001778103.1 | 0,855143449 |
| XR_001778111.1 | 0,94778399  |
| XR_001778112.1 | 0,931156201 |
| XR_001778114.1 | 1,074411001 |
| XR_001778126.1 | 1,073248218 |
| XR_001778162.1 | 0,950159388 |
| XR_001778168.1 | 1,350291165 |
| XR_001778180.1 | 0,920923715 |
| XR_001778181.1 | 1,045341439 |
| XR_001778189.1 | 1,662778929 |
| XR_001778217.1 | 0,912759497 |
| XR_001778224.1 | 1,567762991 |
| XR_001778225.1 | 2,280382532 |
| XR_001778226.1 | 0,598600415 |
| XR_001778227.1 | 1,140191266 |
| XR_001778231.1 | 0,731622729 |
| XR_001778233.1 | 1,078430906 |
| XR_001778235.1 | 0,498833679 |
| XR_001778240.1 | 6,484837825 |
| XR_001778242.1 | 0,748250518 |
| XR_001778251.1 | 0,587129504 |
| XR_001778258.1 | 0,997667358 |
| XR_001778262.1 | 0,570095633 |
| XR_001778283.1 | 0,544182195 |
| XR_001778284.1 | 0,665111572 |
| XR_001778288.1 | 0,748250518 |
| XR_001778297.1 | 1,330223144 |
| XR_001778301.1 | 0,810604728 |
| XR_001778309.1 | 0,780783149 |
| XR_001778315.1 | 1,662778929 |
| XR_001778334.1 | 1,140191266 |
| XR_001778370.1 | 0,391940748 |
| XR_001778377.1 | 0,641357587 |
| XR_001778378.1 | 0,997667358 |
| XR_001778380.1 | 0,862390428 |
| XR_001778390.1 | 1,123809208 |
| XR_001778391.1 | 1,090834737 |
| XR_001778393.1 | 0,740692432 |
| XR_001778401.1 | 1,08924069  |
| XR_001778402.1 | 0,5372055   |
| XR_001778409.1 | 0,770924776 |
| XR_001778430.1 | 0,949000657 |
| XR_001778437.1 | 0,96548454  |
| XR_001778448.1 | 0,997087992 |
| XR_001778449.1 | 1,014295147 |
| XR_001778462.1 | 0,332555786 |
| XR_001778467.1 | 1,662778929 |
| XR_001778471.1 | 1,304076251 |
| XR_001778473.1 | 1,309438407 |

|                |             |
|----------------|-------------|
| XR_001778481.1 | 0,813224653 |
| XR_001778498.1 | 1,169955295 |
| XR_001778519.1 | 1,08836439  |
| XR_001778521.1 | 1,019355778 |
| XR_001778534.1 | 0,690692786 |
| XR_001778539.1 | 0,415694732 |
| XR_001778542.1 | 0,997667358 |
| XR_001778543.1 | 0,989353463 |
| XR_001778544.1 | 1,355526301 |
| XR_001778558.1 | 0,436479469 |
| XR_001778561.1 | 0,872958938 |
| XR_001778572.1 | 0,849864786 |
| XR_001778580.1 | 1,003450937 |
| XR_001778601.1 | 0,997667358 |
| XR_001778602.1 | 1,122375777 |
| XR_001778603.1 | 0,690692786 |
| XR_001778606.1 | 0,634879228 |
| XR_001778609.1 | 0,498833679 |
| XR_001778626.1 | 1,579639983 |
| XR_001778641.1 | 1,627773057 |
| XR_001778645.1 | 0,529374516 |
| XR_001778646.1 | 0,739012858 |
| XR_001778652.1 | 0,665111572 |
| XR_001778665.1 | 0,853268135 |
| XR_001778670.1 | 0,563898941 |
| XR_001778679.1 | 0,816273293 |
| XR_001778680.1 | 0,665111572 |
| XR_001778718.1 | 1,360455488 |
| XR_001778719.1 | 0,679660887 |
| XR_001778750.1 | 2,369459974 |
| XR_001778768.1 | 1,122375777 |
| XR_001778783.1 | 0,887253579 |
| XR_001778788.1 | 0,609685607 |
| XR_001778835.1 | 1,219371215 |
| XR_001778840.1 | 0,631855993 |
| XR_001778868.1 | 0,36278813  |
| XR_001778884.1 | 1,087746352 |
| XR_001778902.1 | 0,720537536 |
| XR_001778919.1 | 1,056353673 |
| XR_001778948.1 | 0,997667358 |
| XR_001778950.1 | 0,946504929 |
| XR_001778985.1 | 0,356309771 |
| XR_001778999.1 | 0,855143449 |
| XR_001779013.1 | 0,997667358 |
| XR_001779016.1 | 1,551927001 |
| XR_001779020.1 | 0,665111572 |
| XR_001779023.1 | 1,039236831 |
| XR_001779051.1 | 1,551927001 |
| XR_001779058.1 | 0,909637885 |
| XR_001779074.1 | 0,772759687 |
| XR_001779084.1 | 1,715987855 |
| XR_001779085.1 | 0,272091098 |
| XR_001779123.1 | 0,665111572 |
| XR_001779144.1 | 0,272091098 |
| XR_001779175.1 | 0,909637885 |
| XR_001779180.1 | 0,739012858 |

|                |             |
|----------------|-------------|
| XR_001779209.1 | 0,831389465 |
| XR_001779250.1 | 0,427571725 |
| XR_001779260.1 | 1,330223144 |
| XR_001779301.1 | 0,897900622 |
| XR_001779312.1 | 1,08836439  |
| XR_001779313.1 | 0,821608412 |
| XR_001779326.1 | 1,083181703 |
| XR_001779327.1 | 0,475079694 |
| XR_001779329.1 | 0,954290516 |
| XR_001779361.1 | 1,260211399 |
| XR_001779371.1 | 0,997667358 |
| XR_001779396.1 | 1,912195769 |
| XR_001779404.1 | 0,809428234 |
| XR_001779405.1 | 1,190199655 |
| XR_001779417.1 | 0,665111572 |
| XR_001779454.1 | 1,388058932 |
| XR_001779466.1 | 0,483717507 |
| XR_001779480.1 | 0,997667358 |
| XR_001779488.1 | 1,425239082 |
| XR_001779489.1 | 1,501344082 |
| XR_001779492.1 | 0,554259643 |
| XR_001779505.1 | 0,892649741 |
| XR_001779513.1 | 0,997667358 |
| XR_001779514.1 | 0,954290516 |
| XR_001779516.1 | 1,051595323 |
| XR_001779522.1 | 0,913526737 |
| XR_001779529.1 | 1,445894721 |
| XR_001779533.1 | 1,050176166 |
| XR_001779535.1 | 1,111146109 |
| XR_001779543.1 | 0,825342996 |
| XR_001779545.1 | 0,712619541 |
| XR_001779561.1 | 0,831389465 |
| XR_001779563.1 | 0,498833679 |
| XR_001779565.1 | 1,260211399 |
| XR_001779568.1 | 1,077480746 |
| XR_001779570.1 | 1,158581448 |
| XR_001779574.1 | 5,320892574 |
| XR_001779575.1 | 1,143160514 |
| XR_001779586.1 | 0,76137772  |
| XR_001779587.1 | 0,547107906 |
| XR_001779598.1 | 0,544182195 |
| XR_001779635.1 | 0,299300207 |
| XR_001779638.1 | 1,416687648 |
| XR_001779643.1 | 1,596267772 |
| XR_001779655.1 | 0,679262882 |
| XR_001779656.1 | 1,45115252  |
| XR_001779670.1 | 0,498833679 |
| XR_001779681.1 | 0,498833679 |
| XR_001779704.1 | 0,957357565 |
| XR_001779711.1 | 0,950159388 |
| XR_001779735.1 | 0,704235782 |
| XR_001779751.1 | 1,280026044 |
| XR_001779761.1 | 0,798133886 |
| XR_001779763.1 | 0,675839178 |
| XR_001779765.1 | 0,311771049 |
| XR_001779772.1 | 1,330223144 |

|                |             |
|----------------|-------------|
| XR_001779789.1 | 0,554259643 |
| XR_001779823.1 | 0,881915896 |
| XR_001779824.1 | 0,872958938 |
| XR_001779838.1 | 0,525088083 |
| XR_001779841.1 | 0,613949143 |
| XR_001779843.1 | 0,997667358 |
| XR_001779853.1 | 6,651115718 |
| XR_001779875.1 | 0,645549467 |
| XR_001779879.1 | 0,665111572 |
| XR_001779921.1 | 1,113384261 |
| XR_001779930.1 | 0,876000607 |
| XR_001779935.1 | 0,861602049 |
| XR_001779939.1 | 1,381385572 |
| XR_001779950.1 | 0,997667358 |
| XR_001779951.1 | 1,07643057  |
| XR_001779957.1 | 0,718816233 |
| XR_001779998.1 | 0,981176988 |
| XR_001780008.1 | 1,320985483 |
| XR_001780022.1 | 1,062032994 |
| XR_001780029.1 | 0,917075844 |
| XR_001780032.1 | 1,094619358 |
| XR_001780034.1 | 0,764878308 |
| XR_001780048.1 | 1,648319982 |
| XR_001780052.1 | 1,145469929 |
| XR_001780064.1 | 0,237539847 |
| XR_001780066.1 | 0,665111572 |
| XR_001780069.1 | 1,260211399 |
| XR_001780075.1 | 1,318346151 |
| XR_001780079.1 | 1,155193783 |
| XR_001780098.1 | 1,295427427 |
| XR_001780101.1 | 0,704235782 |
| XR_001780121.1 | 1,182948438 |
| XR_001780122.1 | 1,054676921 |
| XR_001780157.1 | 1,043015874 |
| XR_001780167.1 | 1,060021568 |
| XR_001780190.1 | 0,598600415 |
| XR_001780202.1 | 1,558855246 |
| XR_001780203.1 | 0,96548454  |
| XR_001780227.1 | 0,80763548  |
| XR_001780246.1 | 0,931156201 |
| XR_001780268.1 | 0,7759635   |
| XR_001780278.1 | 1,00954435  |
| XR_001780281.1 | 1,28865367  |
| XR_001780284.1 | 0,818598858 |
| XR_001780294.1 | 0,897900622 |
| XR_001780304.1 | 1,197200829 |
| XR_001780315.1 | 1,027301042 |
| XR_001780333.1 | 0,928862712 |
| XR_001780335.1 | 0,83804058  |
| XR_001780337.1 | 1,496501037 |
| XR_001780352.1 | 0,848017254 |
| XR_001780364.1 | 1,279060715 |
| XR_001780365.1 | 1,662778929 |
| XR_001780379.1 | 0,554259643 |
| XR_001780399.1 | 0,613949143 |
| XR_001780400.1 | 1,496501037 |

|                |             |
|----------------|-------------|
| XR_001780403.1 | 0,80763548  |
| XR_001780441.1 | 1,688360144 |
| XR_001780443.1 | 1,995334715 |
| XR_001780449.1 | 0,809219079 |
| XR_001780454.1 | 1,295217271 |
| XR_001780457.1 | 1,151154643 |
| XR_001780467.1 | 0,544182195 |
| XR_001780491.1 | 0,598600415 |
| XR_001780493.1 | 1,103976174 |
| XR_001780506.1 | 0,577596891 |
| XR_001780508.1 | 1,621209456 |
| XR_001780562.1 | 0,926405404 |
| XR_001780563.1 | 1,060021568 |
| XR_001780564.1 | 0,897900622 |
| XR_001780577.1 | 0,332555786 |
| XR_001780621.1 | 1,371792617 |
| XR_001780625.1 | 0,457264206 |
| XR_001780626.1 | 0,544182195 |
| XR_001780629.1 | 1,468788054 |
| XR_001780638.1 | 2,42290644  |
| XR_001780646.1 | 0,892649741 |
| XR_001780655.1 | 0,880294727 |
| XR_001780666.1 | 1,140191266 |
| XR_001780668.1 | 0,764878308 |
| XR_001780681.1 | 1,197200829 |
| XR_001780682.1 | 1,304641929 |
| XR_001780686.1 | 0,997667358 |
| XR_001780690.1 | 1,197200829 |
| XR_001780745.1 | 1,084421041 |
| XR_001780752.1 | 0,942241393 |
| XR_001780755.1 | 1,995334715 |
| XR_001780770.1 | 0,954290516 |
| XR_001780794.1 | 0,798133886 |
| XR_001780796.1 | 0,731622729 |
| XR_001780824.1 | 0,9683242   |
| XR_001780826.1 | 0,680227744 |
| XR_001780828.1 | 1,534872858 |
| XR_001780830.1 | 1,080806304 |
| XR_001780831.1 | 0,831389465 |
| XR_001780852.1 | 0,767436429 |
| XR_001780853.1 | 1,030922936 |
| XR_001780871.1 | 0,7759635   |
| XR_001780872.1 | 0,829230012 |
| XR_001780873.1 | 0,972249081 |
| XR_001780882.1 | 0,767436429 |
| XR_001780890.1 | 0,897900622 |
| XR_001780899.1 | 1,180912383 |
| XR_001780912.1 | 0,935313148 |
| XR_001780922.1 | 1,496501037 |
| XR_001780935.1 | 1,643216824 |
| XR_001780952.1 | 0,652320965 |
| XR_001780953.1 | 2,448819878 |
| XR_001780977.1 | 1,330223144 |
| XR_001780979.1 | 0,370562161 |
| XR_001780983.1 | 1,795801244 |
| XR_001781006.1 | 0,767436429 |

|                |             |
|----------------|-------------|
| XR_001781017.1 | 0,427571725 |
| XR_001781018.1 | 0,920923715 |
| XR_001781022.1 | 0,634879228 |
| XR_001781056.1 | 2,161612608 |
| XR_001781067.1 | 0,72557626  |
| XR_001781078.1 | 0,907713743 |
| XR_001781094.1 | 2,106186644 |
| XR_001781103.1 | 0,960254832 |
| XR_001781127.1 | 1,064178515 |
| XR_001781135.1 | 0,7759635   |
| XR_001781167.1 | 0,498833679 |
| XR_001781181.1 | 0,923766072 |
| XR_001781192.1 | 1,353977128 |
| XR_001781212.1 | 0,733578939 |
| XR_001781252.1 | 0,997667358 |
| XR_001781260.1 | 0,570095633 |
| XR_001781278.1 | 0,906970325 |
| XR_001781352.1 | 1,425239082 |
| XR_001781357.1 | 0           |
| XR_001781401.1 | 1,496501037 |
| XR_001781426.1 | 1,212549558 |
| XR_001781477.1 | 0,665111572 |
| XR_001781492.1 | 0,831389465 |
| XR_001781494.1 | 1,387857928 |
| XR_001781495.1 | 0,973913373 |
| XR_001781500.1 | 1,353977128 |
| XR_001781505.1 | 1,018452094 |
| XR_001781508.1 | 0,737406308 |
| XR_001781514.1 | 0,914528411 |
| XR_001781540.1 | 0,901118904 |
| XR_001781556.1 | 1,995334715 |
| XR_001781561.1 | 0,390391575 |
| XR_001781563.1 | 1,167509846 |
| XR_001781567.1 | 1,254210393 |
| XR_001781572.1 | 0,554259643 |
| XR_001781575.1 | 1,074411001 |
| XR_001781578.1 | 1,015170294 |
| XR_001781583.1 | 1,007952588 |
| XR_001781586.1 | 0,399066943 |
| XR_001781599.1 | 0,532089257 |
| XR_001781614.1 | 0,755808604 |
| XR_001781615.1 | 0,997667358 |
| XR_001781619.1 | 0,374125259 |
| XR_001781625.1 | 0,574414539 |
| XR_001781627.1 | 0,997667358 |
| XR_001781634.1 | 3,491835752 |
| XR_001781641.1 | 0,5372055   |
| XR_001781645.1 | 0,654719203 |
| XR_001781646.1 | 2,369459974 |
| XR_001781660.1 | 0,332555786 |
| XR_001781662.1 | 0,809428234 |
| XR_001781680.1 | 1,309438407 |
| XR_001781700.1 | 0,831389465 |
| XR_001781713.1 | 0,598600415 |
| XR_001781721.1 | 1,41336209  |
| XR_001781723.1 | 1,621209456 |

|                |             |
|----------------|-------------|
| XR_001781731.1 | 1,135276648 |
| XR_001781738.1 | 1,021421342 |
| XR_001781743.1 | 1,330223144 |
| XR_001781754.1 | 1,710286899 |
| XR_001781755.1 | 0,72557626  |
| XR_001781758.1 | 0,544182195 |
| XR_001781773.1 | 0,732232923 |
| XR_001781779.1 | 1,247084197 |
| XR_001781792.1 | 1,291098933 |
| XR_001781794.1 | 0,956097884 |
| XR_001781813.1 | 1,662778929 |
| XR_001781817.1 | 2,549594359 |
| XR_001781820.1 | 0,72557626  |
| XR_001781837.1 | 1,02463134  |
| XR_001781853.1 | 0,733578939 |
| XR_001781869.1 | 1,037123129 |
| XR_001781889.1 | 1,190764266 |
| XR_001781892.1 | 0,570095633 |
| XR_001781899.1 | 0,997667358 |
| XR_001781914.1 | 0,665111572 |
| XR_001781916.1 | 1,104893289 |
| XR_001781923.1 | 1,338941835 |
| XR_001781958.1 | 0,415694732 |
| XR_001781961.1 | 0,544182195 |
| XR_001781962.1 | 0,665111572 |
| XR_001781963.1 | 0,623542099 |
| XR_001781998.1 | 0,665111572 |
| XR_001782002.1 | 1,745917876 |
| XR_001782035.1 | 1,912195769 |
| XR_001782060.1 | 1,085300301 |
| XR_001782071.1 | 1,169678971 |
| XR_001782092.1 | 1,249180137 |
| XR_001782093.1 | 1,030922936 |
| XR_001782096.1 | 0,563898941 |
| XR_001782130.1 | 2,161612608 |
| XR_001782156.1 | 1,621209456 |
| XR_001782160.1 | 0,36278813  |
| XR_001782166.1 | 0,80763548  |
| XR_001782169.1 | 1,219371215 |
| XR_001782171.1 | 1,121499606 |
| XR_001782172.1 | 0,532089257 |
| XR_001782177.1 | 0,877259228 |
| XR_001782178.1 | 0,979919781 |
| XR_001782185.1 | 0,607275783 |
| XR_001782213.1 | 1,250409755 |
| XR_001782234.1 | 0,855143449 |
| XR_001782246.1 | 1,140191266 |
| XR_001782262.1 | 0,9749931   |
| XR_001782268.1 | 0,518787026 |
| XR_001782272.1 | 1,718204894 |
| XR_001782331.1 | 0,857499217 |
| XR_001782344.1 | 0,848017254 |
| XR_001782366.1 | 0,867536833 |
| XR_001782369.1 | 1,092683297 |
| XR_001782400.1 | 1,218204353 |
| XR_001782401.1 | 0,831389465 |

|                |             |
|----------------|-------------|
| XR_001782403.1 | 0,415694732 |
| XR_001782406.1 | 1,075499563 |
| XR_001782422.1 | 0,872958938 |
| XR_001782452.1 | 0,804242054 |
| XR_001782471.1 | 2,17857974  |
| XR_001782479.1 | 0,617603602 |
| XR_001782499.1 | 1,890317099 |
| XR_001782546.1 | 1,433013114 |
| XR_001782549.1 | 1,197200829 |
| XR_001782550.1 | 1,870626296 |
| XR_001782557.1 | 1,031082054 |
| XR_001782561.1 | 0,77405226  |
| XR_001782563.1 | 0,959781255 |
| XR_001782641.1 | 0,5372055   |
| XR_001782642.1 | 0,798133886 |
| XR_001782645.1 | 1,34713276  |
| XR_001782655.1 | 1,126994608 |
| XR_001782665.1 | 0,885027495 |
| XR_001782667.1 | 0,731622729 |
| XR_001782687.1 | 1,036411721 |
| XR_001782694.1 | 1,425239082 |
| XR_001782700.1 | 0,782484202 |
| XR_001782703.1 | 1,057527399 |
| XR_001782711.1 | 0,892649741 |
| XR_001782722.1 | 0,997667358 |
| XR_001782731.1 | 1,344682091 |
| XR_001782738.1 | 0,816273293 |
| XR_001782741.1 | 0,653339686 |
| XR_001782743.1 | 1,396734301 |
| XR_001782744.1 | 1,074411001 |
| XR_001782751.1 | 1,365229016 |
| XR_001782752.1 | 1,611616501 |
| XR_001782753.1 | 1,133712906 |
| XR_001782755.1 | 1,179061423 |
| XR_001782759.1 | 1,047909599 |
| XR_001782785.1 | 0,674099566 |
| XR_001782834.1 | 1,074411001 |
| XR_001782841.1 | 0,554259643 |
| XR_001782861.1 | 0,696046994 |
| XR_001782881.1 | 1,496501037 |
| XR_001782883.1 | 0,972725674 |
| XR_001782945.1 | 1,28148652  |
| XR_001783149.1 | 1,102684974 |
| XR_001783167.1 | 0,249416839 |
| XR_001783169.1 | 1,056552627 |
| XR_001783170.1 | 1,056934725 |
| XR_001783171.1 | 0,925281398 |
| XR_001783175.1 | 0,690692786 |
| XR_001783177.1 | 2,327890501 |
| XR_001783188.1 | 0,711019946 |
| XR_001783191.1 | 1,596267772 |
| XR_001783204.1 | 1,233956995 |
| XR_001783220.1 | 1,149486303 |
| XR_001783249.1 | 1,995334715 |
| XR_001783272.1 | 0,866395337 |
| XR_001783315.1 | 0,867536833 |



|                |             |
|----------------|-------------|
| XR_001783320.1 | 0,781305762 |
| XR_001783334.1 | 0,399066943 |
| XR_001783380.1 | 0,818980667 |
| XR_001783386.1 | 0,831389465 |
| XR_001783414.1 | 1,146924679 |
| XR_001783416.1 | 0,820865547 |
| XR_001783430.1 | 1,097434093 |
| XR_001783470.1 | 1,529756615 |
| XR_001783473.1 | 0,332555786 |
| XR_001783505.1 | 0,7759635   |
| XR_001783520.1 | 1,368229519 |
| XR_001783521.1 | 0,779427623 |
| XR_001783531.1 | 0,973033596 |
| XR_001783546.1 | 1,312720207 |
| XR_001783547.1 | 1,247084197 |
| XR_001783556.1 | 0,957760663 |
| XR_001783570.1 | 0,071261954 |
| XR_001783572.1 | 0,69836715  |
| XR_001783573.1 | 0,623542099 |
| XR_001783576.1 | 1,140191266 |
| XR_001783595.1 | 0,826638668 |
| XR_001783608.1 | 1,209198095 |
| XR_001783629.1 | 0,498833679 |
| XR_001783631.1 | 0,857993928 |
| XR_001783632.1 | 0,975496972 |
| XR_001783633.1 | 1,156958785 |
| XR_001783649.1 | 1,163945251 |
| XR_001783667.1 | 0,277129822 |
| XR_001783683.1 | 0,904136043 |
| XR_001783686.1 | 1,099074503 |
| XR_001783689.1 | 0,153487286 |
| XR_001783691.1 | 1,567762991 |
| XR_001783723.1 | 0,710981335 |
| XR_001783734.1 | 0,750183982 |
| XR_001783760.1 | 1,135556342 |
| XR_001783797.1 | 1,995334715 |
| XR_001783821.1 | 0,665111572 |
| XR_001783830.1 | 1,08836439  |
| XR_001783831.1 | 0,613949143 |
| XR_001783836.1 | 0,867536833 |
| XR_001783869.1 | 1,541849553 |
| XR_001783925.1 | 1,045175327 |
| XR_001783973.1 | 0,658035917 |
| XR_001783984.1 | 0,812054826 |
| XR_001783992.1 | 0,883648231 |
| XR_001784022.1 | 0,561187889 |
| XR_001784043.1 | 0,581972625 |
| XR_001784078.1 | 1,795801244 |
| XR_001784079.1 | 1,08836439  |
| XR_001784094.1 | 1,140191266 |
| XR_001784095.1 | 1,662778929 |
| XR_001784096.1 | 1,639024945 |
| XR_001784097.1 | 0,997667358 |
| XR_001784101.1 | 1,330223144 |
| XR_001784106.1 | 0,960019533 |
| XR_001784107.1 | 0,702062215 |

|                |             |
|----------------|-------------|
| XR_001784112.1 | 0,971939546 |
| XR_001784121.1 | 0,692824554 |
| XR_001784126.1 | 0,872958938 |
| XR_001784130.1 | 1,153552882 |
| XR_001784147.1 | 1,995334715 |
| XR_001784156.1 | 0,460461857 |
| XR_001784162.1 | 1,224409939 |
| XR_001784178.1 | 0,9749931   |
| XR_001784181.1 | 1,036664127 |
| XR_001784183.1 | 1,496501037 |
| XR_001784184.1 | 1,179061423 |
| XR_001784214.1 | 1,184729987 |
| XR_001784217.1 | 1,269758455 |
| XR_001784221.1 | 0,886815429 |
| XR_001784236.1 | 1,127797883 |
| XR_001784240.1 | 3,990669431 |
| XR_001784243.1 | 0,285047816 |
| XR_001784246.1 | 1,232412618 |
| XR_001784254.1 | 1,03148659  |
| XR_001784270.1 | 0,634879228 |
| XR_001784273.1 | 0,831389465 |
| XR_001784277.1 | 0,72557626  |
| XR_001784308.1 | 0,665111572 |
| XR_001784310.1 | 0,277129822 |
| XR_001784315.1 | 0,821608412 |
| XR_001784340.1 | 3,242418912 |
| XR_001784342.1 | 1,870626296 |
| XR_001784349.1 | 0,498833679 |
| XR_001784380.1 | 0,609685607 |
| XR_001784410.1 | 0,586863152 |
| XR_001784447.1 | 1,437814721 |
| XR_001784495.1 | 0,498833679 |
| XR_001784501.1 | 1,330223144 |
| XR_001784502.1 | 0,913119277 |
| XR_001784503.1 | 0,72557626  |
| XR_001784504.1 | 0,882551893 |
| XR_001784505.1 | 0,920923715 |
| XR_001784516.1 | 0,427571725 |
| XR_001784517.1 | 0,36278813  |
| XR_001784521.1 | 3,741252591 |
| XR_001784556.1 | 0,997667358 |
| XR_001784559.1 | 0,712619541 |
| XR_001784561.1 | 1,355804358 |
| XR_001784571.1 | 0,594763232 |
| XR_001784575.1 | 1,995334715 |
| XR_001784587.1 | 1,432548001 |
| XR_001784591.1 | 1,496501037 |
| XR_001784592.1 | 1,168000809 |
| XR_001784628.1 | 0,865832743 |
| XR_001784630.1 | 0,634879228 |
| XR_001784647.1 | 1,621209456 |
| XR_001784648.1 | 2,327890501 |
| XR_001784663.1 | 0,997667358 |
| XR_001784672.1 | 1,039236831 |
| XR_001784680.1 | 0,997667358 |
| XR_001784694.1 | 0,938981043 |

|                |             |
|----------------|-------------|
| XR_001784696.1 | 0,767436429 |
| XR_001784702.1 | 1,385649108 |
| XR_001784711.1 | 1,534872858 |
| XR_001784716.1 | 0,36278813  |
| XR_001784741.1 | 0,665111572 |
| XR_001784746.1 | 1,330223144 |
| XR_001784751.1 | 0,9749931   |
| XR_001784757.1 | 1,151154643 |
| XR_001784760.1 | 2,82672418  |
| XR_001784821.1 | 1,360455488 |
| XR_001784841.1 | 0,767436429 |
| XR_001784855.1 | 1,870626296 |
| XR_001784868.1 | 0,427571725 |
| XR_001784879.1 | 1,274797179 |
| XR_001784888.1 | 0,453485163 |
| XR_001784928.1 | 0,332555786 |
| XR_001784929.1 | 1,045175327 |
| XR_001784953.1 | 0,819512472 |
| XR_001784955.1 | 0,997667358 |
| XR_001784985.1 | 1,03206968  |
| XR_001784997.1 | 0,818230783 |
| XR_001785004.1 | 0,731622729 |
| XR_001785012.1 | 1,425239082 |
| XR_001785025.1 | 0,671696835 |
| XR_001785035.1 | 1,002086327 |
| XR_001785073.1 | 1,140191266 |
| XR_001785074.1 | 0,720537536 |
| XR_001785076.1 | 0,896454727 |
| XR_001785077.1 | 1,142056475 |
| XR_001785093.1 | 1,117387441 |
| XR_001785095.1 | 1,330223144 |
| XR_001785124.1 | 1,239958002 |
| XR_001785144.1 | 1,163945251 |
| XR_001785158.1 | 0,872958938 |
| XR_001785170.1 | 1,219371215 |
| XR_001785172.1 | 0,956097884 |
| XR_001785196.1 | 0,860732622 |
| XR_001785198.1 | 0,7759635   |
| XR_001785207.1 | 0,399066943 |
| XR_001785249.1 | 1,118596734 |
| XR_001785250.1 | 0,819739421 |
| XR_001785268.1 | 1,252390938 |
| XR_001785282.1 | 1,269758455 |
| XR_001785290.1 | 1,745917876 |
| XR_001785326.1 | 0,798133886 |
| XR_001785331.1 | 0,68411476  |
| XR_001785353.1 | 0,74255607  |
| XR_001785354.1 | 0,695004227 |
| XR_001785398.1 | 0,997667358 |
| XR_001785406.1 | 0,682614508 |
| XR_001785416.1 | 1,567762991 |
| XR_001785423.1 | 0,914528411 |
| XR_001785424.1 | 0,607275783 |
| XR_001785442.1 | 0,997667358 |
| XR_001785452.1 | 0,798133886 |
| XR_001785462.1 | 0,748250518 |

|                |             |
|----------------|-------------|
| XR_001785469.1 | 1,146256113 |
| XR_001785483.1 | 1,795801244 |
| XR_001785492.1 | 1,662778929 |
| XR_001785495.1 | 0,962351699 |
| XR_001785498.1 | 0,701063549 |
| XR_001785499.1 | 1,662778929 |
| XR_001785522.1 | 0,498833679 |
| XR_001785577.1 | 0,876000607 |
| XR_001785585.1 | 0,478880332 |
| XR_001785589.1 | 0,80580825  |
| XR_035095.4    | 1,870626296 |
| XR_035225.4    | 0,735123316 |
| XR_035255.4    | 1,279616828 |
| XR_104601.3    | 1,205514724 |
| XR_104651.5    | 0,997667358 |
| XR_104757.4    | 0,412827872 |
| XR_104759.2    | 0,787632124 |
| XR_104776.4    | 0,945158549 |
| XR_104789.3    | 1,330223144 |
| XR_104899.4    | 0,872958938 |
| XR_104924.4    | 0,864645043 |
| XR_105012.5    | 0,844180072 |
| XR_105027.4    | 1,188710043 |
| XR_105056.5    | 0,997667358 |
| XR_105447.4    | 0,665111572 |
| XR_105474.3    | 0,694029466 |
| XR_105498.4    | 0,787632124 |
| XR_105643.2    | 0,809904119 |
| XR_105750.1    | 1,458129215 |
| XR_105843.4    | 0,824159991 |
| XR_105990.4    | 1,596267772 |
| XR_106038.3    | 0,886815429 |
| XR_106106.3    | 0,932602095 |
| XR_106144.4    | 1,636174467 |
| XR_106151.3    | 0,72557626  |
| XR_106205.4    | 1,995334715 |
| XR_106299.2    | 2,494168394 |
| XR_106464.4    | 1,154164198 |
| XR_140462.4    | 0,740204814 |
| XR_140477.4    | 0,89007578  |
| XR_140622.5    | 1,140191266 |
| XR_140695.4    | 0,460461857 |
| XR_140756.5    | 0,956097884 |
| XR_140771.3    | 0,399066943 |
| XR_140792.4    | 0,997667358 |
| XR_140846.3    | 0,957760663 |
| XR_140937.2    | 0,873989586 |
| XR_140938.4    | 0,855143449 |
| XR_141051.5    | 1,765103787 |
| XR_141061.4    | 0,769035255 |
| XR_141138.4    | 0,399066943 |
| XR_141159.4    | 1,344682091 |
| XR_141234.3    | 1,01407636  |
| XR_141401.4    | 0,682614508 |
| XR_168405.4    | 0,234745261 |
| XR_168527.1    | 0,570095633 |

|             |             |
|-------------|-------------|
| XR_373281.2 | 0,906970325 |
| XR_373299.2 | 1,197200829 |
| XR_373388.3 | 0,498833679 |
| XR_373397.3 | 1,132184305 |
| XR_373428.1 | 0,589530711 |
| XR_373518.2 | 1,021421342 |
| XR_373533.2 | 0,997667358 |
| XR_373585.2 | 0,754333856 |
| XR_373614.3 | 0,702902002 |
| XR_373617.3 | 0,5372055   |
| XR_373663.2 | 1,03148659  |
| XR_373672.2 | 0,926405404 |
| XR_373689.2 | 1,074411001 |
| XR_373704.3 | 0,4655781   |
| XR_373747.2 | 1,330223144 |
| XR_373751.3 | 1,247084197 |
| XR_373778.2 | 1,100652375 |
| XR_373878.3 | 1,330223144 |
| XR_373879.3 | 1,723243618 |
| XR_373881.3 | 0,607014477 |
| XR_373886.2 | 0,997667358 |
| XR_373942.3 | 0,748250518 |
| XR_374059.3 | 1,795801244 |
| XR_374060.2 | 0,685896308 |
| XR_374118.3 | 0,580039161 |
| XR_374179.1 | 1,041044199 |
| XR_374187.3 | 0,755376714 |
| XR_374214.3 | 1,311219956 |
| XR_374271.3 | 0,72557626  |
| XR_374337.3 | 0,203605583 |
| XR_374396.3 | 0,332555786 |
| XR_374419.2 | 0,810604728 |
| XR_374480.3 | 0,872958938 |
| XR_374504.3 | 0,356309771 |
| XR_374515.2 | 0,399066943 |
| XR_374521.1 | 1,496501037 |
| XR_374547.3 | 0,783881495 |
| XR_374619.3 | 0,570095633 |
| XR_374739.1 | 0,522587664 |
| XR_374766.2 | 0,727465782 |
| XR_374768.3 | 3,658113645 |
| XR_374800.3 | 1,367492326 |
| XR_374846.3 | 1,330223144 |
| XR_374848.1 | 0,812054826 |
| XR_374937.1 | 0,498833679 |
| XR_374979.3 | 0,942241393 |
| XR_375000.3 | 1,080806304 |
| XR_375013.2 | 0,293431576 |
| XR_375015.2 | 0,940657794 |
| XR_375040.1 | 1,130689672 |
| XR_375050.1 | 0,897900622 |
| XR_375112.3 | 1,071568643 |
| XR_375123.2 | 0,498833679 |
| XR_375154.2 | 0,933003733 |
| XR_375175.1 | 1,360455488 |
| XR_375186.3 | 0,897900622 |

|             |             |
|-------------|-------------|
| XR_375211.3 | 0,928862712 |
| XR_375212.3 | 1,696034508 |
| XR_375242.2 | 0,997667358 |
| XR_375268.2 | 0,7759635   |
| XR_375287.1 | 0,589530711 |
| XR_375295.2 | 0,974465791 |
| XR_375322.2 | 2,394401658 |
| XR_375359.2 | 1,33616164  |
| XR_375370.2 | 1,312720207 |
| XR_375402.3 | 0,997667358 |
| XR_375442.2 | 0,997667358 |
| XR_375514.3 | 0,816273293 |
| XR_375565.2 | 1,371792617 |
| XR_375583.3 | 1,360455488 |
| XR_375649.3 | 1,019355778 |
| XR_375686.2 | 0,997667358 |
| XR_375712.3 | 0,917210313 |
| XR_375721.2 | 0,541590851 |
| XR_375773.3 | 1,355321693 |
| XR_375819.2 | 0,978105253 |
| XR_375820.1 | 1,330223144 |
| XR_375830.3 | 0,213785862 |
| XR_375854.3 | 1,484900253 |
| XR_375857.2 | 0,60153473  |
| XR_375880.1 | 3,242418912 |
| XR_375938.3 | 1,496501037 |
| XR_375960.2 | 0,498833679 |
| XR_375963.3 | 1,100874326 |
| XR_375985.1 | 2,137858624 |
| XR_376014.2 | 0,821608412 |
| XR_376015.2 | 1,330223144 |
| XR_376017.3 | 1,085462085 |
| XR_376051.2 | 1,151154643 |
| XR_376078.2 | 0,937202669 |
| XR_376293.2 | 0,99472872  |
| XR_376311.3 | 0,956097884 |
| XR_376358.3 | 1,496501037 |
| XR_376437.3 | 1,182420572 |
| XR_376494.2 | 1,696034508 |
| XR_376499.1 | 0,806624672 |
| XR_376552.2 | 1,163945251 |
| XR_376559.2 | 0,548717047 |
| XR_376626.2 | 0,875003338 |
| XR_376661.3 | 0,665111572 |
| XR_376887.2 | 0,909637885 |
| XR_376919.2 | 0,272091098 |
| XR_376931.2 | 0,285047816 |
| XR_376934.3 | 0,977714011 |
| XR_376977.2 | 1,496501037 |
| XR_377032.2 | 1,904637683 |
| XR_377125.3 | 1,064178515 |
| XR_377194.2 | 1,039236831 |
| XR_377246.2 | 1,151154643 |
| XR_377247.2 | 0,938981043 |
| XR_377254.2 | 0,967886243 |
| XR_377280.2 | 1,151154643 |

|             |             |
|-------------|-------------|
| XR_377294.3 | 2,59393513  |
| XR_377326.3 | 1,829056822 |
| XR_377380.2 | 0,3103854   |
| XR_377466.3 | 0,787632124 |
| XR_377467.3 | 1,396734301 |
| XR_377495.2 | 0,997667358 |
| XR_377539.3 | 0,906970325 |
| XR_377548.1 | 1,163945251 |
| XR_377572.3 | 0,498833679 |
| XR_377576.3 | 0,5372055   |
| XR_377732.3 | 0,627354146 |
| XR_377786.3 | 1,140191266 |
| XR_377865.1 | 1,349785249 |
| XR_377964.3 | 0,31505285  |
| XR_377972.2 | 0,897900622 |
| XR_377973.3 | 1,056353673 |
| XR_378022.3 | 0,689876364 |
| XR_378023.1 | 0,598600415 |
| XR_378024.3 | 0,498833679 |
| XR_378038.2 | 2,394401658 |
| XR_378049.3 | 0,770924776 |
| XR_378076.2 | 0,230230929 |
| XR_378118.3 | 0,737406308 |
| XR_378222.3 | 4,323225217 |
| XR_378347.2 | 0,997667358 |
| XR_378356.2 | 1,430390549 |
| XR_378423.1 | 1,496501037 |
| XR_378441.3 | 1,03267323  |
| XR_378488.2 | 1,45115252  |
| XR_378678.3 | 1,080361711 |
| XR_378684.3 | 0,880294727 |
| XR_378735.3 | 1,141216618 |
| XR_378815.3 | 1,437176827 |
| XR_378826.2 | 0,498833679 |
| XR_378845.3 | 0,948868411 |
| XR_378937.3 | 0,383718214 |
| XR_378953.2 | 0,548717047 |
| XR_379029.3 | 0,60572661  |
| XR_379036.1 | 0,748250518 |
| XR_379050.2 | 0,914528411 |
| XR_379064.2 | 0,920923715 |
| XR_379068.1 | 0,554259643 |
| XR_379082.3 | 1,224409939 |
| XR_379126.3 | 3,159279966 |
| XR_379151.2 | 0,731622729 |
| XR_379162.3 | 0,882891467 |
| XR_379174.1 | 0,623542099 |
| XR_379185.3 | 0,427571725 |
| XR_379197.1 | 3,242418912 |
| XR_379214.2 | 1,434146827 |
| XR_379270.2 | 1,102684974 |
| XR_379336.2 | 0,748250518 |
| XR_379340.3 | 2,120043135 |
| XR_379341.3 | 0,997667358 |
| XR_379369.2 | 1,541849553 |
| XR_379371.1 | 1,006342726 |

|             |             |
|-------------|-------------|
| XR_379388.2 | 0,838746894 |
| XR_379475.3 | 0,076743643 |
| XR_379493.3 | 0,399066943 |
| XR_379512.2 | 0,399066943 |
| XR_379541.3 | 3,990669431 |
| XR_379566.2 | 2,494168394 |
| XR_379583.3 | 0,586863152 |
| XR_379591.3 | 0,764878308 |
| XR_379645.3 | 1,235207205 |
| XR_379651.3 | 0,952318841 |
| XR_379717.3 | 0,831389465 |
| XR_379879.2 | 1,197200829 |
| XR_379891.3 | 1,28865367  |
| XR_379934.3 | 1,140191266 |
| XR_379937.3 | 0,498833679 |
| XR_379994.2 | 0,712619541 |
| XR_380005.1 | 1,12639863  |
| XR_380030.2 | 0,938981043 |
| XR_380033.3 | 1,03206968  |
| XR_380099.3 | 0,890774426 |
| XR_380106.3 | 0,665111572 |
| XR_380167.3 | 1,097434093 |
| XR_380253.2 | 0,554259643 |
| XR_380272.2 | 0,485351688 |
| XR_380326.2 | 1,118075487 |
| XR_380328.1 | 0,69836715  |
| XR_380349.3 | 0,848017254 |
| XR_380351.1 | 1,363478722 |
| XR_380395.3 | 0,36278813  |
| XR_380439.3 | 0,581972625 |
| XR_380453.1 | 1,071568643 |
| XR_380484.2 | 0,769629104 |
| XR_380486.1 | 1,349785249 |
| XR_380545.3 | 0,98294164  |
| XR_380564.2 | 0,816273293 |
| XR_380565.1 | 1,08836439  |
| XR_380597.2 | 1,140191266 |
| XR_380623.1 | 1,108519286 |
| XR_380624.3 | 0,69836715  |
| XR_380645.3 | 1,253479501 |
| XR_380684.2 | 0,902651419 |
| XR_380696.2 | 1,425239082 |
| XR_380738.3 | 0,926405404 |
| XR_380739.2 | 0,942241393 |
| XR_380881.2 | 1,852810807 |
| XR_380888.2 | 1,425239082 |
| XR_380932.2 | 0,631855993 |
| XR_380966.3 | 0,735123316 |
| XR_380980.3 | 1,116437281 |
| XR_381022.3 | 0,7759635   |
| XR_381046.2 | 0,839500581 |
| XR_381052.2 | 1,219371215 |
| XR_381070.3 | 0,498833679 |
| XR_381130.3 | 0,544182195 |
| XR_381186.3 | 1,023445076 |
| XR_381196.3 | 1,108519286 |



|             |             |
|-------------|-------------|
| XR_381213.2 | 0,415694732 |
| XR_381255.3 | 0,997667358 |
| XR_381325.3 | 0,940424149 |
| XR_381341.2 | 1,330223144 |
| XR_381396.2 | 2,161612608 |
| XR_381427.3 | 0,931156201 |
| XR_381537.3 | 0,739012858 |
| XR_381542.3 | 0,840140933 |
| XR_381555.2 | 1,474812616 |
| XR_381639.3 | 0,997667358 |
| XR_381644.3 | 0,719628914 |
| XR_381684.2 | 0,935313148 |
| XR_381688.3 | 0,647835947 |
| XR_381691.2 | 1,282715174 |
| XR_381696.3 | 1,575264249 |
| XR_381704.3 | 1,219371215 |
| XR_381738.2 | 1,282715174 |
| XR_381781.3 | 1,116140356 |
| XR_381796.3 | 1,060021568 |
| XR_381798.3 | 4,988336788 |
| XR_381803.3 | 0,383718214 |
| XR_381806.3 | 0,997667358 |
| XR_381823.3 | 0,819512472 |
| XR_381840.3 | 0,561187889 |
| XR_381914.2 | 0,613949143 |
| XR_381950.3 | 0,920923715 |
| XR_381975.3 | 0,367561658 |
| XR_381986.2 | 2,743585234 |
| XR_381990.2 | 1,02463134  |
| XR_381995.1 | 0,997667358 |
| XR_382012.3 | 0,997667358 |
| XR_382181.1 | 1,060021568 |
| XR_382204.2 | 1,745917876 |
| XR_382205.2 | 0,908616867 |
| XR_382215.3 | 0,570095633 |
| XR_382238.3 | 1,161219384 |
| XR_382246.3 | 0,997667358 |
| XR_382265.2 | 0,985451023 |
| XR_382382.3 | 0,641357587 |
| XR_382384.2 | 0,809701044 |
| XR_382427.3 | 0,855143449 |
| XR_382466.1 | 1,219371215 |
| XR_382470.1 | 1,81927577  |
| XR_382495.2 | 0,638507109 |
| XR_382594.1 | 0,685896308 |
| XR_382663.2 | 1,097434093 |
| XR_382678.2 | 1,309438407 |
| XR_382715.2 | 0,72557626  |
| XR_382731.3 | 1,089477237 |
| XR_382828.3 | 0,591917475 |
| XR_382830.1 | 5,986004146 |
| XR_382927.3 | 1,205025671 |
| XR_382931.2 | 0,688046454 |
| XR_382932.2 | 0,764878308 |
| XR_383133.3 | 0,607275783 |
| XR_383146.3 | 0,886815429 |

|             |             |
|-------------|-------------|
| XR_383170.2 | 0,748250518 |
| XR_383232.3 | 1,454931563 |
| XR_383310.3 | 1,247084197 |
| XR_383322.2 | 1,074411001 |
| XR_383329.3 | 1,122375777 |
| XR_383369.1 | 1,496501037 |
| XR_383395.2 | 0,969162576 |
| XR_383407.2 | 0,992046697 |
| XR_383461.3 | 3,658113645 |
| XR_383486.1 | 0,831389465 |
| XR_383495.3 | 0,997667358 |
| XR_383498.3 | 1,034618001 |
| XR_383507.3 | 1,064178515 |
| XR_383637.3 | 1,08836439  |
| XR_383758.2 | 1,683563666 |
| XR_383782.3 | 0,453485163 |
| XR_383841.3 | 1,829056822 |
| XR_383941.3 | 1,674655922 |
| XR_383965.1 | 0,332555786 |
| XR_383971.3 | 0,641357587 |
| XR_383977.3 | 0,909637885 |
| XR_383978.3 | 1,08836439  |
| XR_383979.3 | 0,935313148 |
| XR_384014.3 | 1,227898286 |
| XR_384128.2 | 0,850470534 |
| XR_384166.3 | 0,641357587 |
| XR_384203.2 | 0,816273293 |
| XR_384242.1 | 0,665111572 |
| XR_384254.2 | 1,282715174 |
| XR_384256.3 | 0,935313148 |
| XR_384266.3 | 0,656360104 |
| XR_384334.1 | 0,498833679 |
| XR_384335.3 | 0,932246547 |
| XR_384352.1 | 1,829056822 |
| XR_384439.2 | 0,931156201 |
| XR_384450.3 | 0,872958938 |
| XR_384451.3 | 0,972725674 |
| XR_384452.2 | 0,4655781   |
| XR_384460.3 | 1,053093322 |
| XR_384508.3 | 0,906970325 |
| XR_384520.3 | 1,24100086  |
| XR_384545.3 | 0,591210286 |
| XR_384581.3 | 7,183204975 |
| XR_384693.2 | 1,147317461 |
| XR_384699.2 | 0,997667358 |
| XR_384703.2 | 2,351644486 |
| XR_384704.2 | 0,498833679 |
| XR_384707.3 | 0,7201208   |
| XR_384751.2 | 1,163945251 |
| XR_384770.2 | 0,997667358 |
| XR_384773.2 | 0,748250518 |
| XR_384806.2 | 0,498833679 |
| XR_384807.2 | 0,586863152 |
| XR_384922.3 | 1,151154643 |
| XR_385187.3 | 0,634879228 |
| XR_385236.3 | 0,665111572 |

|             |             |
|-------------|-------------|
| XR_385254.3 | 0,575577322 |
| XR_385266.2 | 1,033298335 |
| XR_385267.3 | 0,931156201 |
| XR_385298.3 | 1,371792617 |
| XR_385346.2 | 0,415694732 |
| XR_385351.3 | 0,872958938 |
| XR_385369.2 | 0,476159421 |
| XR_385435.3 | 0,986743992 |
| XR_385436.2 | 0,831389465 |
| XR_385459.3 | 0,221703857 |
| XR_385491.3 | 1,862312401 |
| XR_385557.3 | 1,688360144 |
| XR_385566.3 | 1,829056822 |
| XR_385567.3 | 1,113468033 |
| XR_385595.1 | 0,748250518 |
| XR_385618.3 | 1,330223144 |
| XR_385638.3 | 0,285047816 |
| XR_385672.3 | 0,766324202 |
| XR_385719.1 | 1,073248218 |
| XR_385737.2 | 0,963265035 |
| XR_385775.2 | 1,080806304 |
| XR_385776.1 | 2,993002073 |
| XR_385829.3 | 0,412827872 |
| XR_385850.3 | 2,460912816 |
| XR_385899.1 | 0,702062215 |
| XR_385969.3 | 0,9519028   |
| XR_385970.3 | 0,920923715 |
| XR_385971.2 | 1,417737824 |
| XR_385979.3 | 1,319495538 |
| XR_385986.3 | 0,844180072 |
| XR_385990.3 | 1,433013114 |
| XR_386008.3 | 0,807101683 |
| XR_386163.1 | 0,886815429 |
| XR_386174.2 | 0,893616161 |
| XR_386182.2 | 1,995334715 |
| XR_386220.2 | 1,171174724 |
| XR_386237.1 | 0,676988564 |
| XR_386266.3 | 1,84184743  |
| XR_386302.2 | 1,031296594 |
| XR_386353.3 | 1,054676921 |
| XR_386361.2 | 0,498833679 |
| XR_386367.2 | 0,882891467 |
| XR_386399.2 | 0,532089257 |
| XR_386505.3 | 2,137858624 |
| XR_386512.3 | 0,954290516 |
| XR_386532.3 | 0,634879228 |
| XR_386557.3 | 0,285047816 |
| XR_386559.2 | 0,864645043 |
| XR_386561.3 | 5,986004146 |
| XR_386579.1 | 0,831389465 |
| XR_386610.3 | 0,997667358 |
| XR_386617.1 | 1,068612592 |
| XR_386661.3 | 0,96548454  |
| XR_386702.3 | 0,805408544 |
| XR_386705.3 | 1,102684974 |
| XR_386720.2 | 0,902651419 |

|             |             |
|-------------|-------------|
| XR_386771.2 | 1,551927001 |
| XR_386798.2 | 0,69836715  |
| XR_386823.2 | 0,240816259 |
| XR_386825.2 | 1,257928408 |
| XR_386926.2 | 1,353977128 |
| XR_387031.3 | 1,247084197 |
| XR_387059.2 | 2,743585234 |
| XR_387091.3 | 0,997667358 |
| XR_387093.1 | 1,027010515 |
| XR_387097.3 | 1,103480562 |
| XR_387160.3 | 0,712619541 |
| XR_387167.3 | 1,172016993 |
| XR_387186.3 | 0,306974572 |
| XR_387196.2 | 0,612740582 |
| XR_387265.3 | 0,463202702 |
| XR_387281.3 | 1,360455488 |
| XR_387294.2 | 1,158581448 |
| XR_387343.3 | 1,662778929 |
| XR_387360.2 | 0,748250518 |
| XR_387409.2 | 0,997667358 |
| XR_387416.2 | 0,810604728 |
| XR_387422.2 | 0,36278813  |
| XR_387481.2 | 1,551927001 |
| XR_387502.3 | 1,662778929 |
| XR_387522.3 | 0,861984597 |
| XR_387542.2 | 0,997667358 |
| XR_387546.2 | 1,269758455 |
| XR_387593.3 | 2,993002073 |
| XR_387599.3 | 1,247084197 |
| XR_387611.2 | 0,249416839 |
| XR_387634.3 | 0,415694732 |
| XR_387640.3 | 0,813631632 |
| XR_387677.3 | 1,304641929 |
| XR_387740.1 | 1,745917876 |
| XR_387744.2 | 0,942241393 |
| XR_387773.1 | 0,819512472 |
| XR_387774.3 | 1,330223144 |
| XR_387793.3 | 0,931156201 |
| XR_387811.1 | 1,168983975 |
| XR_387846.3 | 0,844180072 |
| XR_387847.3 | 1,135276648 |
| XR_387861.1 | 1,190199655 |
| XR_387984.3 | 0,997667358 |
| XR_387997.3 | 1,829056822 |
| XR_388017.3 | 0,758227192 |
| XR_388057.3 | 0,562786715 |
| XR_388058.2 | 1,330223144 |
| XR_388105.2 | 0,498833679 |
| XR_388136.2 | 0,770924776 |
| XR_388150.3 | 0,748250518 |
| XR_388154.1 | 0,702062215 |
| XR_388180.3 | 0,990591703 |
| XR_388210.1 | 0,302323442 |
| XR_388229.1 | 0,855143449 |
| XR_388254.3 | 1,567762991 |
| XR_388277.3 | 0,735123316 |

|             |             |
|-------------|-------------|
| XR_388303.3 | 0,782979445 |
| XR_388314.3 | 1,330223144 |
| XR_388324.3 | 1,781548853 |
| XR_388330.2 | 1,385649108 |
| XR_388372.3 | 0,990739112 |
| XR_388384.3 | 1,219371215 |
| XR_388499.3 | 1,162376591 |
| XR_388541.3 | 1,238483616 |
| XR_388603.2 | 0,498833679 |
| XR_388627.1 | 0,848017254 |
| XR_388628.1 | 0,460461857 |
| XR_388638.3 | 1,765103787 |
| XR_388653.2 | 0,915986989 |
| XR_388684.2 | 0,356309771 |
| XR_388700.1 | 1,795801244 |
| XR_388723.2 | 0,972086143 |
| XR_388775.2 | 0,831389465 |
| XR_388776.2 | 1,060021568 |
| XR_388840.1 | 1,057871422 |
| XR_388866.3 | 1,163945251 |
| XR_388972.1 | 0,522587664 |
| XR_388997.3 | 0,448950311 |
| XR_389006.1 | 0,80580825  |
| XR_389019.3 | 1,130689672 |
| XR_389060.3 | 0,634879228 |
| XR_389090.3 | 0,997667358 |
| XR_389161.3 | 0,770924776 |
| XR_389185.2 | 2,743585234 |
| XR_389218.3 | 1,829056822 |
| XR_389226.3 | 1,197200829 |
| XR_389232.3 | 0,69457854  |
| XR_389233.3 | 0,936585683 |
| XR_389234.3 | 0,997667358 |
| XR_389239.1 | 1,263711986 |
| XR_389269.3 | 0,997667358 |
| XR_389275.3 | 2,194868187 |
| XR_389296.2 | 0,665111572 |
| XR_389297.3 | 0,978105253 |
| XR_389309.3 | 0,631855993 |
| XR_389430.3 | 0,798133886 |
| XR_389431.1 | 0,827851637 |
| XR_389494.3 | 1,330223144 |
| XR_389508.3 | 0,680227744 |
| XR_389511.2 | 1,21145322  |
| XR_389609.3 | 0,864645043 |
| XR_389629.3 | 0,938981043 |
| XR_389733.3 | 0,598600415 |
| XR_389738.3 | 1,71938417  |
| XR_389962.3 | 0,787048693 |
| XR_389979.2 | 0,997667358 |
| XR_390022.3 | 1,408471564 |
| XR_390317.3 | 2,12835703  |
| XR_390320.2 | 0,997667358 |
| XR_390362.2 | 0,083138946 |
| XR_390562.2 | 1,151154643 |
| XR_390583.1 | 0,498833679 |

|             |             |
|-------------|-------------|
| XR_390676.2 | 0,912821747 |
| XR_390720.2 | 1,194609485 |
| XR_390724.1 | 0,886815429 |
| XR_390755.1 | 1,122375777 |
| XR_390775.3 | 1,795801244 |
| XR_390809.3 | 0,997667358 |
| XR_390814.2 | 0,982995779 |
| XR_390830.3 | 0,712619541 |
| XR_390831.3 | 1,330223144 |
| XR_390845.2 | 0,5372055   |
| XR_390879.2 | 0,544182195 |
| XR_390902.3 | 0,7759635   |
| XR_390931.2 | 0,821608412 |
| XR_390992.3 | 0,954290516 |
| XR_391036.1 | 0,481632518 |
| XR_391037.3 | 0,498833679 |
| XR_391064.3 | 1,360455488 |
| XR_391094.2 | 1,112782822 |
| XR_391099.3 | 0,679262882 |
| XR_391102.2 | 1,140191266 |
| XR_391128.2 | 1,534872858 |
| XR_391130.2 | 0,925021676 |
| XR_391131.2 | 1,453743864 |
| XR_391160.2 | 0,819512472 |
| XR_391164.2 | 0,789819991 |
| XR_391166.3 | 1,105523288 |
| XR_391253.3 | 0,367561658 |
| XR_391271.2 | 0,653644131 |
| XR_391315.3 | 1,557895951 |
| XR_391401.3 | 0,712619541 |
| XR_391441.3 | 0,7520877   |
| XR_391540.1 | 1,396734301 |
| XR_391564.3 | 1,245791882 |
| XR_391646.2 | 1,126994608 |
| XR_865170.1 | 2,106186644 |
| XR_865290.2 | 1,41336209  |
| XR_865295.1 | 1,282715174 |
| XR_865466.1 | 1,579639983 |
| XR_865478.1 | 0,923766072 |
| XR_865492.2 | 1,071961735 |
| XR_865521.2 | 1,282715174 |
| XR_865545.2 | 0,641357587 |
| XR_865569.2 | 0,293431576 |
| XR_865570.2 | 1,21145322  |
| XR_865575.2 | 1,384151109 |
| XR_865578.2 | 0,798133886 |
| XR_865726.1 | 0,917170969 |
| XR_865733.1 | 1,134052596 |
| XR_865773.2 | 0,748250518 |
| XR_865774.2 | 0,920923715 |
| XR_865779.1 | 1,745917876 |
| XR_865812.2 | 0,902000625 |
| XR_865818.2 | 0,96413232  |
| XR_865819.2 | 0,943739392 |
| XR_865878.2 | 1,130170054 |
| XR_865880.2 | 0,830986855 |

|             |             |
|-------------|-------------|
| XR_865881.2 | 0,5205221   |
| XR_865884.2 | 0,906970325 |
| XR_865896.2 | 0,5372055   |
| XR_865897.2 | 1,242603655 |
| XR_865917.1 | 0,952318841 |
| XR_865972.2 | 0,89531088  |
| XR_865973.1 | 0,8953425   |
| XR_865986.2 | 0,598600415 |
| XR_865987.2 | 1,396734301 |
| XR_866005.1 | 1,054676921 |
| XR_866057.2 | 1,179061423 |
| XR_866059.2 | 1,020564641 |
| XR_866070.1 | 1,84184743  |
| XR_866071.2 | 0,78885326  |
| XR_866106.2 | 0,657553486 |
| XR_866107.2 | 1,064178515 |
| XR_866114.2 | 0,554259643 |
| XR_866115.1 | 1,710286899 |
| XR_866158.1 | 1,839449191 |
| XR_866163.1 | 0,760127511 |
| XR_866168.1 | 1,122375777 |
| XR_866173.1 | 3,658113645 |
| XR_866175.1 | 0,6207708   |
| XR_866205.2 | 1,269758455 |
| XR_866359.2 | 0,872958938 |
| XR_866401.2 | 0,831389465 |
| XR_866447.1 | 0,7759635   |
| XR_866474.2 | 0,715308672 |
| XR_866494.2 | 1,155193783 |
| XR_866527.2 | 0,890226258 |
| XR_866562.1 | 0,90624764  |
| XR_866563.1 | 1,417737824 |
| XR_866564.1 | 1,688360144 |
| XR_866575.1 | 0,704235782 |
| XR_866576.2 | 0,133022314 |
| XR_866592.1 | 0,36278813  |
| XR_866610.2 | 2,095101451 |
| XR_866612.2 | 0,544182195 |
| XR_866644.2 | 1,795801244 |
| XR_866660.1 | 0,997667358 |
| XR_866699.2 | 0,938981043 |
| XR_866700.2 | 1,080806304 |
| XR_866701.1 | 1,496501037 |
| XR_866702.2 | 1,097434093 |
| XR_866724.1 | 0,997667358 |
| XR_866762.2 | 1,496501037 |
| XR_866764.2 | 1,995334715 |
| XR_866872.1 | 0,897900622 |
| XR_866878.1 | 0,690692786 |
| XR_866940.2 | 1,102684974 |
| XR_866948.1 | 0,933816647 |
| XR_866998.1 | 0,997667358 |
| XR_867022.1 | 1,173726303 |
| XR_867024.2 | 0,690692786 |
| XR_867035.1 | 0,688046454 |
| XR_867037.1 | 0,638507109 |

|             |             |
|-------------|-------------|
| XR_867193.2 | 0,712619541 |
| XR_867194.2 | 1,296967565 |
| XR_867198.1 | 0,798133886 |
| XR_867226.2 | 1,870626296 |
| XR_867236.2 | 0,920923715 |
| XR_867277.1 | 1,567762991 |
| XR_867446.1 | 1,995334715 |
| XR_867447.2 | 0,653644131 |
| XR_867490.2 | 0,688046454 |
| XR_867568.1 | 0,157526425 |
| XR_867593.1 | 1,710286899 |
| XR_867597.1 | 1,000242458 |
| XR_867605.2 | 1,036039179 |
| XR_867609.2 | 1,371792617 |
| XR_867638.1 | 1,4757163   |
| XR_867676.2 | 1,184729987 |
| XR_867759.2 | 0,36278813  |
| XR_867777.1 | 1,117387441 |
| XR_867804.2 | 0,634879228 |
| XR_867850.2 | 1,607352965 |
| XR_867886.2 | 0,955512399 |
| XR_867911.2 | 0,741855215 |
| XR_867944.2 | 0,5372055   |
| XR_867945.1 | 0,881659525 |
| XR_867954.1 | 1,137857996 |
| XR_868002.1 | 0,544182195 |
| XR_868005.2 | 0,872958938 |
| XR_868014.1 | 1,122375777 |
| XR_868016.2 | 0,230230929 |
| XR_868042.1 | 1,544009006 |
| XR_868182.1 | 0,712619541 |
| XR_868203.2 | 0,92389618  |
| XR_868282.2 | 0,634879228 |
| XR_868323.2 | 0,872958938 |
| XR_868340.1 | 1,596267772 |
| XR_868373.1 | 1,219371215 |
| XR_868455.2 | 0,623542099 |
| XR_868516.1 | 1,070667408 |
| XR_868592.1 | 1,171174724 |
| XR_868594.1 | 1,012126305 |
| XR_868599.1 | 0,548717047 |
| XR_868638.2 | 1,110610832 |
| XR_868665.2 | 0,554259643 |
| XR_868670.1 | 0,712619541 |
| XR_868679.2 | 1,007965859 |
| XR_868681.2 | 0,460461857 |
| XR_868683.2 | 0,748250518 |
| XR_868694.1 | 1,105848156 |
| XR_868740.1 | 0,855143449 |
| XR_868765.1 | 0,581972625 |
| XR_868808.1 | 0,997667358 |
| XR_868852.2 | 2,327890501 |
| XR_868863.2 | 0,969201305 |
| XR_868934.1 | 0,951264225 |
| XR_869053.2 | 1,115369686 |
| XR_869154.2 | 1,904637683 |



|             |             |
|-------------|-------------|
| XR_869172.2 | 1,423143143 |
| XR_869174.1 | 1,385649108 |
| XR_869182.2 | 1,219371215 |
| XR_869209.1 | 0,890262977 |
| XR_869220.1 | 1,567762991 |
| XR_869226.1 | 2,549594359 |
| XR_869243.2 | 0,767436429 |
| XR_869249.2 | 0,752339319 |
| XR_869345.2 | 0,640013022 |
| XR_869361.2 | 0,718320498 |
| XR_869397.2 | 0,7759635   |
| XR_869407.2 | 0,554259643 |
| XR_869413.2 | 1,197200829 |
| XR_869418.1 | 0,641357587 |
| XR_869424.2 | 1,710286899 |
| XR_869427.1 | 0,927409093 |
| XR_869481.1 | 2,244751555 |
| XR_869488.2 | 6,484837825 |
| XR_869496.1 | 0,409299429 |
| XR_869498.2 | 2,369459974 |
| XR_869501.2 | 1,163945251 |
| XR_869505.2 | 1,795801244 |
| XR_869515.1 | 0,993739533 |
| XR_869526.2 | 0,997667358 |
| XR_869642.2 | 0,812386277 |
| XR_869695.2 | 0,741855215 |
| XR_869713.2 | 0,767436429 |
| XR_869743.2 | 1,340615512 |
| XR_869796.2 | 1,163945251 |
| XR_869813.2 | 1,097434093 |
| XR_869814.1 | 0,498833679 |
| XR_869815.1 | 0,96565664  |
| XR_869836.1 | 3,990669431 |
| XR_869837.1 | 1,330223144 |
| XR_869849.1 | 6,983671504 |
| XR_869851.2 | 0,872958938 |
| XR_869867.1 | 1,08836439  |
| XR_869903.1 | 0,748250518 |
| XR_869914.2 | 0,997667358 |
| XR_869942.2 | 0,672341045 |
| XR_869948.2 | 0,930408884 |
| XR_869951.1 | 1,995334715 |
| XR_870010.1 | 0,959781255 |
| XR_870034.2 | 1,101591041 |
| XR_870093.1 | 1,541849553 |
| XR_870159.1 | 1,064178515 |
| XR_870180.1 | 0,665111572 |
| XR_870186.1 | 0,498833679 |
| XR_870187.2 | 1,230456408 |
| XR_870313.2 | 0,237539847 |
| XR_870342.1 | 0,920923715 |
| XR_870451.2 | 0,906970325 |
| XR_870491.1 | 0,940657794 |
| XR_870494.2 | 0,682614508 |
| XR_870504.1 | 0,748250518 |
| XR_870559.2 | 0,557519994 |

|             |             |
|-------------|-------------|
| XR_870576.2 | 1,662778929 |
| XR_870577.1 | 1,567762991 |
| XR_870578.2 | 1,745917876 |
| XR_870580.1 | 0,935313148 |
| XR_870628.1 | 0,997667358 |
| XR_870648.2 | 0,570095633 |
| XR_870723.2 | 0,715717887 |
| XR_870726.2 | 0,680227744 |
| XR_870738.2 | 0,997667358 |
| XR_870768.2 | 1,003194601 |
| XR_870786.1 | 1,496501037 |
| XR_870803.1 | 0,5288839   |
| XR_870825.2 | 0,857254915 |
| XR_870850.1 | 1,683563666 |
| XR_870867.2 | 0,469490521 |
| XR_870870.2 | 1,136876756 |
| XR_870879.1 | 1,995334715 |
| XR_870905.2 | 0,570095633 |
| XR_870917.1 | 1,360455488 |
| XR_870918.1 | 0,665111572 |
| XR_870919.1 | 1,200092619 |
| XR_870940.1 | 0,997667358 |
| XR_871039.2 | 0,872958938 |
| XR_871081.2 | 0,7759635   |
| XR_871130.1 | 0,665111572 |
| XR_871161.2 | 1,122375777 |
| XR_871211.2 | 1,181238151 |
| XR_871264.2 | 1,525844194 |
| XR_871276.2 | 1,004668532 |
| XR_871326.2 | 1,683563666 |
| XR_871439.2 | 0,729064608 |
| XR_871449.1 | 0,935313148 |
| XR_871470.2 | 0,374125259 |
| XR_871529.2 | 1,425239082 |
| XR_871530.1 | 0,816273293 |
| XR_871563.1 | 0,554259643 |
| XR_871565.1 | 1,330223144 |
| XR_871574.1 | 1,662778929 |
| XR_871622.2 | 0,36278813  |
| XR_871838.1 | 0,806624672 |
| XR_871845.1 | 0,598600415 |
| XR_871894.1 | 1,277014218 |
| XR_871932.2 | 1,524214019 |
| XR_871945.2 | 0,844180072 |
| XR_871946.1 | 0,523775363 |
| XR_871950.1 | 1,230456408 |
| XR_872000.1 | 0,82897964  |
| XR_872055.2 | 1,330223144 |
| XR_872169.2 | 0,969162576 |
| XR_872171.2 | 0,904136043 |
| XR_872173.1 | 1,080806304 |
| XR_872182.2 | 0,748250518 |
| XR_872211.2 | 1,446617669 |
| XR_872212.1 | 1,596267772 |
| XR_872231.2 | 0,886815429 |
| XR_872234.2 | 0,756222746 |

|             |             |
|-------------|-------------|
| XR_872235.2 | 0,570095633 |
| XR_872289.1 | 0,431979681 |
| XR_872333.1 | 0,475079694 |
| XR_872503.1 | 1,621209456 |
| XR_872527.1 | 0,920923715 |
| XR_872534.2 | 1,108519286 |
| XR_872537.2 | 0,922168206 |
| XR_872546.2 | 0,665111572 |
| XR_872575.2 | 0,69836715  |
| XR_872666.2 | 1,431080226 |
| XR_872687.1 | 0,838618938 |
| XR_872690.1 | 0,997667358 |
| XR_872723.2 | 1,496501037 |
| XR_872830.2 | 0,831389465 |
| XR_872842.2 | 1,551927001 |
| XR_872845.2 | 0,554259643 |
| XR_872846.2 | 0,96548454  |
| XR_872854.2 | 1,282715174 |
| XR_872872.2 | 0,7759635   |
| XR_872928.2 | 0,472579275 |
| XR_872935.1 | 0,570095633 |
| XR_872943.1 | 1,017942039 |
| XR_872946.2 | 0,855143449 |
| XR_872976.2 | 0,878897434 |
| XR_873020.1 | 1,219371215 |
| XR_873031.1 | 0,931156201 |
| XR_873139.1 | 0,892649741 |
| XR_873144.2 | 0,498833679 |
| XR_873148.2 | 1,645503304 |
| XR_873171.1 | 0,969564052 |
| XR_873226.1 | 0,748250518 |
| XR_873236.2 | 0,72557626  |
| XR_873237.2 | 1,157294135 |
| XR_873373.2 | 6,484837825 |
| XR_873431.2 | 1,296967565 |
| XR_873435.2 | 1,396734301 |
| XR_873437.2 | 1,148829079 |
| XR_873492.1 | 0,61081675  |
| XR_873570.1 | 0,672341045 |
| XR_873685.1 | 0,997667358 |
| XR_873690.2 | 0,498833679 |
| XR_873707.2 | 1,100874326 |
| XR_873816.2 | 0,665111572 |
| XR_873862.2 | 1,496501037 |
| XR_873868.1 | 1,441075072 |
| XR_873877.1 | 0,579290724 |
| XR_873962.1 | 0,753793115 |
| XR_873966.2 | 1,551927001 |
| XR_873980.1 | 0,906970325 |
| XR_874004.2 | 1,204730394 |
| XR_874006.2 | 0,385890204 |
| XR_874125.2 | 0,498833679 |
| XR_874150.2 | 0,731622729 |
| XR_874211.1 | 1,773630858 |
| XR_874326.2 | 0,478880332 |
| XR_874343.2 | 1,145469929 |

|             |             |
|-------------|-------------|
| XR_874375.2 | 0,810604728 |
| XR_874393.2 | 1,330223144 |
| XR_874396.2 | 1,119334109 |
| XR_874399.2 | 0,323567792 |
| XR_874471.2 | 1,852810807 |
| XR_874490.2 | 1,179061423 |
| XR_874580.2 | 0,908985815 |
| XR_874581.2 | 0,918487409 |
| XR_874599.2 | 0,785898343 |
| XR_874615.1 | 0,863652339 |
| XR_874638.2 | 1,097434093 |
| XR_874641.1 | 0,824159991 |
| XR_874656.2 | 0,153487286 |
| XR_874660.2 | 0,798133886 |
| XR_874705.2 | 0,598600415 |
| XR_874710.2 | 0,886815429 |
| XR_874728.2 | 1,140191266 |
| XR_874748.1 | 0,972725674 |
| XR_874819.1 | 1,579639983 |
| XR_874955.1 | 1,151154643 |
| XR_874990.1 | 1,257060871 |
| XR_874998.2 | 1,995334715 |
| XR_874999.2 | 1,396734301 |
| XR_875022.2 | 0,199533472 |
| XR_875092.2 | 0,5205221   |
| XR_875099.1 | 0,762922097 |
| XR_875101.2 | 1,216667509 |
| XR_875155.2 | 0,166277893 |
| XR_875169.1 | 1,995334715 |
| XR_875301.2 | 0,93051667  |
| XR_875304.1 | 1,108519286 |
| XR_875307.2 | 0,938282396 |
| XR_875316.2 | 1,330223144 |
| XR_875317.2 | 0,997667358 |
| XR_875335.1 | 2,494168394 |
| XR_875364.1 | 0,816273293 |
| XR_875365.2 | 0,641357587 |
| XR_875374.1 | 0,937202669 |
| XR_875429.2 | 0,878542897 |
| XR_875478.2 | 1,127797883 |
| XR_875480.1 | 0,554259643 |
| XR_875535.2 | 0,509447161 |
| XR_875560.1 | 1,272885939 |
| XR_875569.1 | 0,903151503 |
| XR_875570.1 | 0,931156201 |
| XR_875571.2 | 0,864645043 |
| XR_875643.2 | 0,972409956 |
| XR_875663.2 | 0,36278813  |
| XR_875666.1 | 1,567762991 |
| XR_875670.2 | 0,831389465 |
| XR_875671.1 | 0,7759635   |
| XR_875675.2 | 1,745917876 |
| XR_875677.1 | 1,067272057 |
| XR_875682.1 | 0,7759635   |
| XR_875706.1 | 1,260211399 |
| XR_875867.2 | 1,023921762 |

|             |             |
|-------------|-------------|
| XR_875871.2 | 0,997667358 |
| XR_875907.2 | 0,762922097 |
| XR_875921.1 | 1,091565462 |
| XR_875930.2 | 1,159681715 |
| XR_875942.2 | 0,9323439   |
| XR_875943.1 | 1,41336209  |
| XR_875944.1 | 0,923011977 |
| XR_875960.2 | 0,383718214 |
| XR_875977.1 | 2,194868187 |
| XR_876005.1 | 1,02538034  |
| XR_876056.2 | 0,380063755 |
| XR_876087.2 | 1,423143143 |
| XR_876191.2 | 0,641357587 |
| XR_876192.2 | 1,662778929 |
| XR_876241.2 | 0,528176836 |
| XR_876315.2 | 0,783881495 |
| XR_876357.1 | 0,920923715 |
| XR_876407.1 | 0,952318841 |
| XR_876526.1 | 0,878740123 |
| XR_876641.2 | 0,674099566 |
| XR_876654.1 | 0,525088083 |
| XR_876671.2 | 0,791253422 |
| XR_876673.2 | 1,330223144 |
| XR_876674.2 | 3,658113645 |
| XR_876675.2 | 0,957760663 |
| XR_876676.2 | 0,82307557  |
| XR_876677.2 | 1,441075072 |
| XR_876696.2 | 0,914625062 |
| XR_876712.2 | 1,551927001 |
| XR_876713.1 | 0,613949143 |
| XR_876749.2 | 1,330223144 |
| XR_876750.2 | 1,20240605  |
| XR_876756.2 | 0,498833679 |
| XR_876890.1 | 0,716274    |
| XR_876914.2 | 1,099199876 |
| XR_876915.1 | 1,41336209  |
| XR_876932.2 | 1,512592446 |
| XR_876983.1 | 1,632546585 |
| XR_877040.2 | 0,997667358 |
| XR_877041.2 | 0,872958938 |
| XR_877085.1 | 0,759418436 |
| XR_877087.2 | 0,648483782 |
| XR_877091.1 | 0,810604728 |
| XR_877095.1 | 0,399066943 |
| XR_877103.2 | 1,108519286 |
| XR_877120.2 | 0,489013643 |
| XR_877141.1 | 0,756851099 |
| XR_877159.1 | 0,946504929 |
| XR_877168.1 | 1,551927001 |
| XR_877174.2 | 1,056353673 |
| XR_877178.2 | 0,920923715 |
| XR_877190.2 | 0,415694732 |
| XR_877297.2 | 1,060021568 |
| XR_877307.1 | 0,720537536 |
| XR_877322.2 | 1,079667414 |
| XR_877324.2 | 1,525844194 |

|             |             |
|-------------|-------------|
| XR_877328.1 | 0,80763548  |
| XR_877341.2 | 0,295605143 |
| XR_877381.2 | 1,263711986 |
| XR_877472.2 | 1,038388474 |
| XR_877474.1 | 0,665111572 |
| XR_877482.2 | 1,425239082 |
| XR_877505.1 | 0,831389465 |
| XR_877520.1 | 2,161612608 |
| XR_877535.1 | 1,567762991 |
| XR_877549.2 | 0,953813847 |
| XR_877551.2 | 1,077939444 |
| XR_877578.2 | 0,563898941 |
| XR_877636.2 | 2,743585234 |
| XR_877677.2 | 1,064178515 |
| XR_877690.1 | 0,410804206 |
| XR_877702.2 | 1,209293767 |
| XR_877703.2 | 0,798133886 |
| XR_877772.2 | 1,696034508 |
| XR_877793.2 | 0,399066943 |
| XR_877802.1 | 1,425239082 |
| XR_877811.2 | 0,498833679 |
| XR_877814.2 | 0,681596018 |
| XR_877830.2 | 1,41336209  |
| XR_877839.2 | 0,665111572 |
| XR_877841.1 | 1,795801244 |
| XR_877896.2 | 1,031372336 |
| XR_877902.1 | 1,918591072 |
| XR_877903.1 | 0,544182195 |
| XR_877918.2 | 0,748250518 |
| XR_877919.2 | 1,059251762 |
| XR_877920.1 | 1,380106511 |
| XR_877933.2 | 0,748250518 |
| XR_877967.2 | 0,665111572 |
| XR_877975.1 | 0,902651419 |
| XR_878036.1 | 1,296967565 |
| XR_878039.2 | 1,496501037 |
| XR_878063.1 | 1,567762991 |
| XR_878072.1 | 1,030922936 |
| XR_878126.2 | 0,546341648 |
| XR_878184.1 | 0,69836715  |
| XR_878254.1 | 0,460461857 |
| XR_878264.2 | 1,795801244 |
| XR_878265.2 | 0,886815429 |
| XR_878274.1 | 0,920923715 |
| XR_878285.2 | 2,137858624 |
| XR_878288.1 | 0,748250518 |
| XR_878297.2 | 0,817330984 |
| XR_878314.1 | 0,645549467 |
| XR_878320.1 | 1,163945251 |
| XR_878327.1 | 0,528176836 |
| XR_878339.1 | 1,567762991 |
| XR_878352.2 | 1,078559306 |
| XR_878363.2 | 0,249416839 |
| XR_878401.1 | 1,122375777 |
| XR_878415.1 | 2,194868187 |
| XR_878509.2 | 0,977306799 |

|             |             |
|-------------|-------------|
| XR_878523.2 | 0,942241393 |
| XR_878527.1 | 0,623542099 |
| XR_878531.1 | 0,36278813  |
| XR_878546.2 | 1,060021568 |
| XR_878576.2 | 0,73043503  |
| XR_878599.2 | 0,844180072 |
| XR_878679.1 | 1,949986199 |
| XR_878684.2 | 0,391940748 |
| XR_878686.2 | 1,050523906 |
| XR_878689.1 | 0,706918585 |
| XR_878693.2 | 1,330223144 |
| XR_878704.1 | 0,997667358 |
| XR_878708.1 | 0,665111572 |
| XR_878709.2 | 0,665111572 |
| XR_878716.1 | 1,148829079 |
| XR_878747.2 | 1,441075072 |
| XR_878851.1 | 1,662778929 |
| XR_878934.1 | 0,798133886 |
| XR_878996.1 | 0,581972625 |
| XR_879009.2 | 1,041044199 |
| XR_879039.2 | 0,544182195 |
| XR_879048.1 | 0,696783551 |
| XR_879085.1 | 1,219371215 |
| XR_879086.2 | 0,36278813  |
| XR_879107.1 | 0,554259643 |
| XR_879129.1 | 0,554259643 |
| XR_879144.2 | 0,764878308 |
| XR_879194.2 | 0,383718214 |
| XR_879217.1 | 0,4655781   |
| XR_879249.2 | 0,460461857 |
| XR_879259.1 | 1,247084197 |
| XR_879285.2 | 1,122375777 |
| XR_879307.2 | 0,729571724 |
| XR_879319.1 | 0,623542099 |
| XR_879381.2 | 1,795801244 |
| XR_879406.1 | 1,12639863  |
| XR_879471.2 | 1,611616501 |
| XR_879485.2 | 0,913287531 |
| XR_879492.1 | 0,665111572 |
| XR_879493.2 | 1,621209456 |
| XR_879539.2 | 2,327890501 |
| XR_879612.2 | 0,844180072 |
| XR_879716.2 | 1,995334715 |
| XR_879736.2 | 0,69836715  |
| XR_879807.2 | 1,381385572 |
| XR_879897.2 | 0,83804058  |
| XR_879906.1 | 0,831389465 |
| XR_879908.1 | 0,737406308 |
| XR_879969.2 | 0,947152555 |
| XR_879994.2 | 1,662778929 |
| XR_880009.2 | 1,330223144 |
| XR_880037.1 | 0,554259643 |
| XR_880074.1 | 0,498833679 |
| XR_880100.1 | 1,053093322 |
| XR_880101.2 | 1,115039988 |
| XR_880138.1 | 1,122375777 |

|             |             |
|-------------|-------------|
| XR_880164.1 | 1,31718174  |
| XR_880173.2 | 1,104560289 |
| XR_880224.2 | 0,949290801 |
| XR_880240.2 | 0,598600415 |
| XR_880241.1 | 0,730176834 |
| XR_880261.1 | 1,296967565 |
| XR_880324.2 | 0,525088083 |
| XR_880325.2 | 0,383718214 |
| XR_880340.1 | 2,161612608 |
| XR_880343.1 | 1,140191266 |
| XR_880359.1 | 0,831389465 |
| XR_880363.2 | 0,240816259 |
| XR_880365.2 | 0,824159991 |
| XR_880371.1 | 1,015806764 |
| XR_880392.2 | 1,441075072 |
| XR_880414.2 | 0,997667358 |
| XR_880431.2 | 1,122375777 |
| XR_880475.1 | 1,200445276 |
| XR_880518.1 | 1,852810807 |
| XR_880563.2 | 1,353977128 |
| XR_880592.2 | 1,829056822 |
| XR_880610.1 | 0,880294727 |
| XR_880768.2 | 0,804180355 |
| XR_880770.2 | 1,026585252 |
| XR_880864.2 | 0,554259643 |
| XR_880870.1 | 1,745917876 |
| XR_880878.2 | 0,864645043 |
| XR_880915.1 | 1,371792617 |
| XR_880992.2 | 0,880294727 |
| XR_881001.2 | 0,427571725 |
| XR_881066.2 | 1,122375777 |
| XR_881068.2 | 0,931156201 |
| XR_881071.2 | 1,068929312 |
| XR_881078.1 | 1,454931563 |
| XR_881101.1 | 1,995334715 |
| XR_881132.2 | 0,318404476 |
| XR_881143.1 | 0,856970679 |
| XR_881194.1 | 0,748250518 |
| XR_881265.2 | 0,997667358 |
| XR_881303.2 | 0,383718214 |
| XR_881344.1 | 1,184729987 |
| XR_881351.1 | 0,848946758 |
| XR_881379.2 | 0,665111572 |
| XR_881403.1 | 0,69836715  |
| XR_881441.2 | 0,787632124 |
| XR_881491.2 | 0,306974572 |
| XR_881498.2 | 1,179061423 |
| XR_881499.2 | 0,971511285 |
| XR_881562.1 | 1,042674908 |
| XR_881580.2 | 0,665111572 |
| XR_881587.2 | 0,498833679 |
| XR_881589.2 | 1,309438407 |
| XR_881615.1 | 0,627105196 |
| XR_881620.1 | 0,708868912 |
| XR_881621.1 | 0,457945672 |
| XR_881633.1 | 1,107320887 |



|             |             |
|-------------|-------------|
| XR_881641.1 | 1,330223144 |
| XR_881642.1 | 0,782484202 |
| XR_881742.2 | 1,45115252  |
| XR_881802.2 | 0,453485163 |
| XR_881803.2 | 0,862390428 |
| XR_881807.2 | 0,634879228 |
| XR_881809.2 | 0,997667358 |
| XR_881829.2 | 0,904136043 |
| XR_881839.2 | 1,453743864 |
| XR_881864.2 | 0,748250518 |
| XR_881866.2 | 0,641357587 |
| XR_881874.1 | 0,844180072 |
| XR_881879.2 | 2,793468602 |
| XR_881899.2 | 1,108048863 |
| XR_881907.2 | 1,197200829 |
| XR_881916.2 | 1,44822681  |
| XR_881946.2 | 0,613949143 |
| XR_881947.2 | 0,522587664 |
| XR_881949.2 | 1,371792617 |
| XR_881956.2 | 1,353977128 |
| XR_881959.1 | 0,762922097 |
| XR_882029.2 | 0,958797201 |
| XR_882051.1 | 1,132617532 |
| XR_882064.2 | 0,691297067 |
| XR_882182.2 | 0,556837595 |
| XR_882206.1 | 1,662778929 |
| XR_882215.2 | 1,89556798  |
| XR_882236.1 | 1,773630858 |
| XR_882252.2 | 1,137690846 |
| XR_882286.2 | 0,997667358 |
| XR_882356.2 | 1,546384404 |
